# Supplementary material for: Transglutaminase 2 promotes tumorigenicity of colon cancer cells by inactivation of the tumor suppressor p53
Source: Oncogene. 2021 Jun 8;40(25):4352–67. doi: 10.1038/s41388-021-01847-w (PMC8225513; doi:10.1038/s41388-021-01847-w)
Supplement: Supplementary file 2 — Supplemental Table S2 [file 41388_2021_1847_MOESM2_ESM.xlsx]

## Sheet: SW480
			Supplementary table S2. List of differentially regulated genes upon TGM2 knock-down (shRNA-1) in SW480 and HCT116 cells
		Ensembl gene id	Cntrl1	Cntrl2	Cntrl3	Cntrl4	SH1_1	SH1_2	SH1_3	SH1_4	symbol	log2FoldChange_Sh1	pvalue_Sh1	padj_Sh1
		ENSG00000181143	48.6002	72.2223	78.6148	8.47522	0	1.04497	0.746365	2.1614	MUC16	-3.88874	7.50995e-18	2.7146e-16
		ENSG00000131435	146.793	105.691	135.982	37.0791	7.263	3.13492	5.97092	5.4035	PDLIM4	-3.72157	1.68094e-28	1.86749e-26
		ENSG00000147689	941.257	785.638	889.197	269.088	60.1791	53.2936	90.3102	31.3403	FAM83A	-3.39362	1.3519e-52	1.09427e-49
		ENSG00000169876	73.3963	71.3415	106.236	22.2474	1.03757	3.13492	3.73183	3.2421	MUC17	-3.35604	1.52295e-14	3.69551e-13
		ENSG00000212479	36.6981	32.5881	37.1827	7.41581	0	1.04497	2.2391	0		-3.25105	9.48864e-12	1.564e-10
		ENSG00000135702	32.7308	32.5881	32.9332	13.7722	2.07514	1.04497	0	2.1614	CHST5	-3.21175	8.10301e-15	2.05421e-13
		ENSG00000140835	206.303	154.133	176.352	260.613	12.4509	19.8545	18.6591	24.8561	CHST4	-3.20889	2.36058e-38	6.52442e-36
		ENSG00000086548	686.354	553.117	558.803	1148.39	60.1791	56.4285	44.0355	171.831	CEACAM6	-3.13602	4.1592e-60	4.7132e-57
		ENSG00000173269	1331.05	1043.7	1203.66	893.076	151.485	142.116	128.375	100.505	MMRN2	-3.04966	1.78833e-99	4.05308e-95
		ENSG00000100181	446.329	443.022	478.063	306.167	43.578	30.3042	31.3473	70.2455	TPTEP1	-3.04389	1.05092e-28	1.19689e-26
		ENSG00000169783	32.7308	24.6613	30.8085	56.1483	1.03757	4.17989	1.49273	3.2421	LINGO1	-2.96093	5.68558e-12	9.71047e-11
		ENSG00000103528	115.054	102.168	73.303	23.3068	8.30057	3.13492	6.71729	6.4842	SYT17	-2.92998	3.35228e-13	6.80789e-12
		ENSG00000128591	982.915	528.456	786.148	16.9504	32.1647	16.7196	10.4491	21.614	FLNC	-2.91748	1.13681e-08	1.14256e-07
		ENSG00000167780	67.4452	53.7263	66.9288	18.0098	5.18786	4.17989	2.98546	5.4035	SOAT2	-2.88734	4.0625e-13	8.14081e-12
		ENSG00000086696	3200.67	2991.94	2900.25	1096.48	295.708	290.502	220.178	355.55	HSD17B2	-2.87688	7.15536e-32	1.16668e-29
		ENSG00000101197	152.744	138.279	149.793	56.1483	15.5636	21.9444	14.9273	6.4842	BIRC7	-2.87025	2.42528e-28	2.62998e-26
		ENSG00000156966	251.928	189.363	224.158	184.336	24.9017	14.6296	7.46365	43.228	B3GNT7	-2.85173	5.78929e-16	1.69301e-14
		ENSG00000180861	148.776	155.014	148.731	206.583	19.7139	20.8994	7.46365	32.421	LINC01559	-2.84098	3.13595e-25	2.52033e-23
		ENSG00000260542	27.7716	22.019	16.9978	12.7128	0	3.13492	0	1.0807		-2.82424	5.50161e-10	6.89268e-09
		ENSG00000240694	40.6655	29.0651	41.4321	5.29701	4.15028	2.08994	1.49273	1.0807	PNMA2	-2.80065	2.96199e-10	3.87143e-09
		ENSG00000196562	7494.35	7367.55	7102.96	3951.57	729.413	717.896	367.212	1293.6	SULF2	-2.75645	7.76733e-17	2.50767e-15
		ENSG00000118849	698.256	761.857	763.839	439.652	97.5317	106.587	97.7738	71.3262	RARRES1	-2.75477	3.94167e-64	6.87185e-61
		ENSG00000163817	183.491	193.767	162.541	34.9603	7.263	4.17989	5.22456	18.3719	SLC6A20	-2.73074	6.73014e-09	7.05186e-08
		ENSG00000117983	317.389	269.512	351.642	60.3859	39.4277	50.1587	9.70275	12.9684	MUC5B	-2.72923	1.76899e-16	5.45475e-15
		ENSG00000100170	1249.72	1344.92	1241.9	759.591	172.237	155.701	136.585	165.347	SLC5A1	-2.7185	3.47289e-40	1.10859e-37
		ENSG00000186806	3492.27	2562.13	2952.31	3190.92	435.78	489.047	388.11	506.849	VSIG10L	-2.70517	1.56252e-96	8.85321e-93
		ENSG00000114698	232.091	280.962	265.591	170.564	22.8266	30.3042	45.5283	34.5824	PLSCR4	-2.65888	9.66951e-28	1.01458e-25
		ENSG00000171401	1440.15	1203.12	1423.57	370.791	87.156	96.1374	42.5428	117.796	KRT13	-2.64696	3.71875e-09	4.06373e-08
		ENSG00000073737	157.703	110.095	120.047	39.1979	11.4133	4.17989	21.6446	10.807	DHRS9	-2.63701	1.38273e-13	2.94808e-12
		ENSG00000240583	163.654	166.464	181.664	127.128	18.6763	15.6746	10.4491	41.0666	AQP1	-2.63475	8.49875e-20	3.68839e-18
		ENSG00000171431	25984.3	22761.5	24320.7	12831.5	2132.21	2080.54	3677.34	4683.76	KRT20	-2.6347	3.89439e-25	3.10783e-23
		ENSG00000215182	22883.8	26170.9	30341.1	4857.36	1673.6	2994.89	393.334	1082.86	MUC5AC	-2.63442	2.47079e-08	2.35187e-07
		ENSG00000229921	18.845	21.1382	22.3096	6.35641	0	3.13492	0.746365	1.0807	KIF25-AS1	-2.62143	3.12989e-08	2.93608e-07
		ENSG00000204949	32.7308	33.4689	32.9332	24.3662	2.07514	3.13492	2.2391	6.4842	FAM83A-AS1	-2.61407	9.58853e-11	1.35062e-09
		ENSG00000141744	53.5594	23.7805	36.1203	26.485	5.18786	4.17989	2.98546	3.2421	PNMT	-2.61082	3.31436e-12	5.86849e-11
		ENSG00000185467	109.103	95.122	110.486	33.9009	9.33814	9.40475	5.22456	18.3719	KPNA7	-2.59572	1.58902e-13	3.3626e-12
		ENSG00000124664	790.498	718.7	609.796	1032.92	131.772	157.791	38.811	124.281	SPDEF	-2.58853	1.63529e-21	8.52006e-20
		ENSG00000085741	620.893	288.889	481.25	146.197	34.2398	29.2592	11.1955	68.0841	WNT11	-2.56923	7.07556e-09	7.37628e-08
		ENSG00000159784	1153.51	1141.46	1121.85	589.027	141.11	182.87	154.498	143.733	FAM131B	-2.56714	1.29565e-43	5.64849e-41
		ENSG00000136859	19.8368	10.5691	19.1225	41.3167	0	1.04497	1.49273	6.4842	ANGPTL2	-2.55504	3.28348e-09	3.62125e-08
		ENSG00000075461	722.06	579.54	544.992	1682.33	93.3814	97.1824	112.701	282.063	CACNG4	-2.54395	5.94846e-80	1.92594e-76
		ENSG00000188487	130.923	120.664	156.167	7.41581	4.15028	5.22486	8.95638	17.2912	INSC	-2.5414	5.8612e-08	5.25675e-07
		ENSG00000123095	8354.28	7733.07	8498.9	6449.64	1468.16	1377.27	650.084	1510.82	BHLHE41	-2.53348	5.26429e-35	1.13629e-32
		ENSG00000134531	8485.2	7325.28	8363.98	2724.78	647.444	554.88	844.885	1101.23	EMP1	-2.52571	9.63033e-11	1.35566e-09
		ENSG00000081277	244.985	217.548	219.909	84.7522	37.3526	31.3492	8.95638	28.0982	PKP1	-2.51789	2.57086e-15	6.95297e-14
		ENSG00000105388	251.928	230.759	234.782	637.76	33.2023	32.3941	13.4346	179.396	CEACAM5	-2.51461	9.13073e-23	5.56287e-21
		ENSG00000173918	94.2249	64.2954	63.7418	67.8017	9.33814	3.13492	15.6737	11.8877	C1QTNF1	-2.50859	6.57053e-13	1.27277e-11
		ENSG00000106789	3808.67	3650.75	3779.89	3233.29	722.15	723.121	182.859	573.852	CORO2A	-2.50521	1.75717e-19	7.44383e-18
		ENSG00000196352	7650.07	6458.61	7080.65	3209.99	924.476	798.359	947.884	1200.66	CD55	-2.50089	9.93002e-28	1.03711e-25
		ENSG00000166396	56.535	55.4879	47.8063	11.6534	3.11271	1.04497	7.46365	1.0807	SERPINB7	-2.50002	1.05531e-07	9.0085e-07
		ENSG00000198074	24356.6	25630.1	24596.9	4235.49	2671.75	2580.04	1127.01	2262.99	AKR1B10	-2.49873	7.39019e-10	9.06339e-09
		ENSG00000129451	8239.23	5029.14	6100.09	1773.44	370.413	362.605	770.995	750.006	KLK10	-2.49392	5.51915e-09	5.89195e-08
		ENSG00000137673	8249.14	6699.94	7824.3	5163.53	747.051	763.874	1480.04	1604.84	MMP7	-2.48317	1.43255e-27	1.48933e-25
		ENSG00000196542	139.85	110.095	120.047	25.4256	19.7139	8.35978	14.1809	7.5649	SPTSSB	-2.46402	1.03242e-10	1.44526e-09
		ENSG00000173227	156.711	107.453	145.544	9.53462	7.263	8.35978	26.1228	5.4035	SYT12	-2.4634	1.04643e-09	1.2535e-08
		ENSG00000074410	16426.9	15459.1	15950.3	9317.44	2503.66	2331.33	2003.24	2917.89	CA12	-2.45163	1.05394e-39	3.18488e-37
		ENSG00000108387	45.6247	41.3957	37.1827	38.1385	4.15028	3.13492	7.46365	8.6456	2004-09-01	-2.44919	4.79898e-12	8.3026e-11
		ENSG00000173237	14.8776	25.542	18.0602	7.41581	2.07514	1.04497	0	2.1614	C11orf86	-2.44863	4.45875e-07	3.43251e-06
		ENSG00000124102	272.756	162.941	195.475	31.7821	12.4509	10.4497	37.3183	18.3719	PI3	-2.44787	1.60892e-10	2.19138e-09
		ENSG00000269985	12.8939	22.8997	12.7484	0	0	0	0	1.0807	LOC101927972	-2.44403	2.78425e-06	1.8451e-05
		ENSG00000168453	262.838	214.025	209.285	297.692	52.9161	49.1137	8.21002	39.9859	HR	-2.43625	4.94946e-14	1.11064e-12
		ENSG00000105971	4669.59	4480.42	4538.41	968.293	324.76	346.931	447.073	742.441	CAV2	-2.43211	7.85407e-10	9.60111e-09
		ENSG00000198574	57.5268	39.6342	52.0558	7.41581	1.03757	2.08994	7.46365	1.0807	SH2D1B	-2.42843	8.82862e-07	6.42349e-06
		ENSG00000260401	963.078	849.933	958.251	835.868	135.922	147.341	174.649	193.445		-2.42049	4.97675e-63	7.51954e-60
		ENSG00000213412	17.8531	6.16532	14.8731	9.53462	0	1.04497	0.746365	1.0807	HNRNPA1P33	-2.41825	2.79628e-06	1.85252e-05
		ENSG00000007306	30.7471	35.2304	29.7462	84.7522	2.07514	10.4497	0	9.72631	CEACAM7	-2.40565	1.25691e-09	1.48445e-08
		ENSG00000168077	352.104	243.97	263.466	90.0492	33.2023	35.529	40.3037	33.5017	SCARA3	-2.39878	5.4588e-14	1.2213e-12
		ENSG00000166897	41.6573	17.6152	39.3074	34.9603	3.11271	2.08994	2.2391	8.6456	ELFN2	-2.3981	7.07902e-08	6.27205e-07
		ENSG00000254521	20.8287	21.1382	18.0602	22.2474	2.07514	3.13492	1.49273	3.2421	SIGLEC12	-2.39713	1.87959e-09	2.17675e-08
		ENSG00000213822	41.6573	45.7995	38.2451	28.6039	3.11271	6.26983	4.47819	8.6456	CEACAM18	-2.3924	1.5399e-12	2.856e-11
		ENSG00000204882	43.641	31.7073	29.7462	13.7722	5.18786	4.17989	5.97092	1.0807	GPR20	-2.3862	9.60353e-10	1.15651e-08
		ENSG00000118194	160.678	118.022	144.481	47.6731	17.6387	7.3148	18.6591	28.0982	TNNT2	-2.36759	8.17557e-12	1.36344e-10
		ENSG00000142549	129.931	133.875	142.357	79.4551	25.9393	24.0344	12.6882	20.5333	IGLON5	-2.36689	4.48905e-19	1.81354e-17
		ENSG00000123096	99.1841	86.3144	118.985	50.8513	17.6387	15.6746	10.4491	16.2105	SSPN	-2.36227	7.06579e-18	2.55813e-16
		ENSG00000012171	1621.66	1058.67	1338.58	1390.99	267.693	283.187	223.91	242.077	SEMA3B	-2.35249	7.17868e-47	4.39723e-44
		ENSG00000115009	267.797	238.686	250.718	75.2175	18.6763	27.1693	53.7383	30.2596	CCL20	-2.33892	3.20396e-14	7.37203e-13
		ENSG00000204616	15693.9	14350.2	15596.5	5787.51	2210.03	2195.49	2127.89	2655.28	TRIM31	-2.33293	1.08275e-23	7.24291e-22
		ENSG00000189325	26.7797	22.8997	32.9332	50.8513	4.15028	6.26983	2.2391	7.5649	C6orf222	-2.30669	1.38029e-11	2.2108e-10
		ENSG00000198959	2495.47	2055.69	2171.47	5298.07	532.274	559.06	96.2811	304.758	TGM2	-2.30506	1.60893e-07	1.33236e-06
		ENSG00000158825	101.168	77.5068	82.8643	135.603	11.4133	9.40475	21.6446	29.1789	CDA	-2.29729	8.89518e-20	3.84001e-18
		ENSG00000227619	11.9021	14.0922	13.8107	25.4256	2.07514	0	0.746365	4.3228		-2.29291	1.27286e-07	1.06806e-06
		ENSG00000256234	18.845	4.4038	10.6236	2.1188	0	0	0	0		-2.2824	1.21667e-05	7.17899e-05
		ENSG00000261068	130.923	119.783	117.922	240.484	22.8266	27.1693	22.391	44.3087		-2.28161	2.38736e-28	2.61387e-26
		ENSG00000168481	16.8613	19.3767	19.1225	1.0594	0	1.04497	2.2391	1.0807	LGI3	-2.27564	4.48273e-06	2.86349e-05
		ENSG00000157368	111.086	95.122	108.361	136.663	18.6763	25.0793	25.3764	15.1298	IL34	-2.27195	2.61979e-21	1.33727e-19
		ENSG00000179546	386.818	333.808	324.021	118.653	47.7283	50.1587	35.0792	72.4069	HTR1D	-2.26712	2.88901e-14	6.70019e-13
		ENSG00000256894	344.169	317.073	311.272	257.435	65.367	71.0581	31.3473	71.3262		-2.25567	1.48196e-22	8.81551e-21
		ENSG00000179873	22.8124	29.0651	38.2451	19.0692	3.11271	5.22486	3.73183	4.3228	NLRP11	-2.25189	2.25884e-08	2.16192e-07
		ENSG00000129990	84.3065	89.8375	110.486	34.9603	4.15028	14.6296	7.46365	25.9368	SYT5	-2.24277	6.93065e-10	8.53212e-09
		ENSG00000007952	1370.72	1979.07	1630.73	1695.04	380.789	366.785	138.078	378.245	NOX1	-2.23493	1.63039e-17	5.70235e-16
		ENSG00000214049	289.618	190.244	265.591	1092.24	50.841	59.5634	71.651	113.474	UCA1	-2.23415	3.22966e-17	1.09413e-15
		ENSG00000187242	34.7144	44.038	55.2429	12.7128	3.11271	1.04497	6.71729	8.6456	KRT12	-2.23033	1.46956e-07	1.22539e-06
		ENSG00000069122	19.8368	20.2575	31.8709	11.6534	4.15028	3.13492	0.746365	3.2421	ADGRF5	-2.22587	9.36631e-07	6.77555e-06
		ENSG00000101198	28.7634	12.3306	30.8085	11.6534	3.11271	2.08994	2.2391	3.2421	NKAIN4	-2.21821	7.3554e-07	5.43006e-06
		ENSG00000189433	122.988	105.691	128.546	57.2077	10.3757	20.8994	26.1228	19.4526	GJB4	-2.21711	1.89562e-17	6.55912e-16
		ENSG00000135925	377.892	280.082	297.462	191.752	51.8786	51.2036	79.8611	48.6315	WNT10A	-2.21019	1.68333e-31	2.63111e-29
		ENSG00000104998	243.993	206.978	264.528	14.8316	15.5636	18.8095	23.8837	21.614	IL27RA	-2.20466	2.42301e-06	1.62374e-05
		ENSG00000076706	3238.36	2688.08	2848.19	1479.98	601.791	561.15	397.066	414.989	MCAM	-2.19934	6.98171e-20	3.0615e-18
		ENSG00000137868	429.467	375.204	369.702	490.503	92.3438	94.0475	97.7738	48.6315	STRA6	-2.19802	1.1892e-16	3.76426e-15
		ENSG00000267702	9.91841	7.92684	20.1849	4.23761	0	0	2.2391	0		-2.19424	2.42181e-05	0.000133873
		ENSG00000216197	5.95105	5.28456	12.7484	16.9504	1.03757	1.04497	0.746365	0		-2.19065	2.28793e-05	0.000127248
		ENSG00000196188	3434.75	3237.67	3196.65	2364.59	568.589	551.745	62.6947	460.378	CTSE	-2.18806	6.49053e-07	4.84204e-06
		ENSG00000088836	409.63	297.697	335.707	163.148	70.5548	66.8782	47.021	55.1157	SLC4A11	-2.18804	3.84018e-19	1.56255e-17
		ENSG00000099139	6792.13	6036.73	6486.79	2774.57	1044.83	1002.13	1079.99	1234.16	PCSK5	-2.17929	5.60588e-20	2.48076e-18
		ENSG00000002587	1956.9	1812.6	1796.46	3214.23	422.291	470.237	296.307	701.375	HS3ST1	-2.17861	3.10197e-52	2.42424e-49
		ENSG00000236056	10.9103	10.5691	14.8731	1.0594	0	0	0.746365	1.0807		-2.17179	3.26636e-05	0.000175673
		ENSG00000184194	51.5757	62.5339	61.617	18.0098	9.33814	8.35978	14.1809	2.1614	GPR173	-2.16735	2.14298e-09	2.45792e-08
		ENSG00000118257	52.5676	43.1572	53.1181	23.3068	1.03757	4.17989	10.4491	10.807	NRP2	-2.16623	1.45354e-07	1.21337e-06
		ENSG00000134827	202.336	283.605	240.094	250.019	29.052	27.1693	41.7964	96.1824	TCN1	-2.15745	4.85157e-13	9.56972e-12
		ENSG00000158786	55.5431	56.3686	31.8709	85.8116	10.3757	8.35978	2.98546	16.2105	PLA2G2F	-2.15503	1.49917e-08	1.47663e-07
		ENSG00000006534	2957.67	2232.73	2293.64	3411.27	720.074	630.118	350.045	591.143	ALDH3B1	-2.14812	1.04685e-23	7.0403e-22
		ENSG00000146192	83.3147	67.8185	86.0514	40.2573	2.07514	4.17989	16.42	22.6947	FGD2	-2.14135	3.14623e-07	2.48761e-06
		ENSG00000168631	72.4044	79.2684	66.9288	77.3363	9.33814	22.9894	8.95638	16.2105	DPCR1	-2.13948	1.07978e-11	1.76439e-10
		ENSG00000157150	165.638	136.518	131.733	92.168	25.9393	26.1243	31.3473	22.6947	TIMP4	-2.13569	4.22087e-16	1.24885e-14
		ENSG00000109686	4949.29	5318.91	5105.71	6015.28	1206.7	1061.69	746.365	1897.71	SH3D19	-2.13237	1.29598e-43	5.64849e-41
		ENSG00000118526	64.4697	63.4147	84.989	56.1483	14.526	13.5846	7.46365	19.4526	TCF21	-2.12827	2.31213e-15	6.3059e-14
		ENSG00000188015	51.5757	40.5149	50.9934	22.2474	11.4133	6.26983	8.95638	4.3228	S100A3	-2.1228	4.27125e-10	5.44146e-09
		ENSG00000113494	225.148	211.382	247.53	204.465	30.0896	49.1137	20.1519	90.7788	PRLR	-2.11964	7.76863e-15	1.98052e-13
		ENSG00000169116	284.658	317.954	273.027	103.821	60.1791	41.7989	46.2746	48.6315	PARM1	-2.11719	5.9714e-17	1.96139e-15
		ENSG00000241544	29.7552	18.496	20.1849	13.7722	1.03757	2.08994	3.73183	4.3228	LOC105374177	-2.10884	3.45866e-06	2.25042e-05
		ENSG00000177076	504.847	439.499	531.181	239.425	98.5693	98.2274	79.8611	95.1016	ACER2	-2.09303	6.79279e-23	4.21785e-21
		ENSG00000121743	43.641	18.496	29.7462	41.3167	1.03757	11.4947	2.98546	6.4842	GJA3	-2.0922	1.02076e-06	7.32798e-06
		ENSG00000122176	29.7552	26.4228	43.5569	20.1286	4.15028	3.13492	7.46365	5.4035	FMOD	-2.08969	5.83568e-08	5.23594e-07
		ENSG00000237070	275.732	338.212	333.582	299.811	75.7427	77.3279	65.6801	62.6806	LOC105375166	-2.08719	8.84226e-31	1.22945e-28
		ENSG00000270172	1431.23	1360.77	1527.68	1229.97	415.028	367.83	202.265	273.417		-2.08207	1.39061e-31	2.18867e-29
		ENSG00000136542	338.218	291.531	372.889	96.4056	23.8641	28.2142	96.2811	51.8736	GALNT5	-2.0817	2.61566e-09	2.94346e-08
		ENSG00000180767	54.5513	30.8266	24.4343	10.594	1.03757	3.13492	3.73183	9.72631	CHST13	-2.08116	4.78533e-06	3.03027e-05
		ENSG00000111328	1379.65	1248.92	1203.66	689.671	272.881	274.828	165.693	274.498	CDK2AP1	-2.07403	2.86424e-22	1.63927e-20
		ENSG00000066322	10316.1	8837.54	9235.12	3795.84	1488.91	1540.29	1968.91	1841.51	ELOVL1	-2.07065	7.17138e-24	4.91034e-22
		ENSG00000090534	15.8695	33.4689	29.7462	8.47522	6.22543	2.08994	1.49273	3.2421	THPO	-2.06973	1.84368e-06	1.26087e-05
		ENSG00000138207	588.162	523.171	536.493	191.752	96.4941	86.7327	87.3247	118.877	RBP4	-2.06758	5.21257e-15	1.35635e-13
		ENSG00000166143	86.2902	106.572	76.4901	61.4453	22.8266	10.4497	31.3473	5.4035	PPP1R14D	-2.05765	7.96775e-12	1.32976e-10
		ENSG00000065534	1119.79	962.67	1087.86	997.957	196.101	199.59	297.8	268.014	MYLK	-2.05689	3.45246e-34	6.92448e-32
		ENSG00000114455	1077.14	1029.61	965.688	2953.61	200.251	199.59	261.974	761.894	HHLA2	-2.05168	1.29559e-26	1.19363e-24
		ENSG00000095303	749.832	722.223	737.28	969.353	178.462	225.714	152.258	172.912	PTGS1	-2.0514	8.76227e-30	1.08518e-27
		ENSG00000052802	4315.5	3997.77	4344	1894.21	804.118	802.538	503.796	1062.33	MSMO1	-2.05086	2.00386e-16	6.14553e-15
		ENSG00000206538	36.6981	37.8727	33.9956	121.831	9.33814	5.22486	8.21002	24.8561	VGLL3	-2.04567	7.7444e-14	1.69584e-12
		ENSG00000174145	48.6002	46.6803	50.9934	32.8415	7.263	8.35978	9.70275	10.807	NWD2	-2.04168	2.26608e-09	2.58817e-08
		ENSG00000116014	7.93473	9.68835	9.56126	14.8316	0	1.04497	1.49273	2.1614	KISS1R	-2.03902	5.71255e-05	0.000290746
		ENSG00000115107	1609.76	1430.35	1454.37	892.016	299.858	381.415	222.417	331.775	STEAP3	-2.03876	2.87053e-30	3.76057e-28
		ENSG00000224559	14.8776	28.1843	42.4945	7.41581	1.03757	6.26983	0.746365	4.3228	LINC01087	-2.03735	8.53864e-06	5.17986e-05
		ENSG00000186188	5826.08	5279.27	5359.62	3760.88	1210.85	1229.93	716.51	1611.32	FFAR4	-2.03319	3.38207e-22	1.92108e-20
		ENSG00000230834	47.6084	46.6803	49.931	46.6137	18.6763	4.17989	7.46365	9.72631		-2.03082	9.71392e-11	1.36489e-09
		ENSG00000156453	5591.01	4621.35	4744.51	7411.58	1277.25	1372.05	1036.7	1666.44	PCDH1	-2.02829	1.18508e-61	1.49215e-58
		ENSG00000109790	1508.59	1334.35	1364.07	928.036	259.393	242.433	344.074	366.357	KLHL5	-2.02407	1.05632e-31	1.68595e-29
		ENSG00000188993	191.425	233.401	205.036	157.851	38.3901	60.6084	32.0937	54.035	LRRC66	-2.02101	5.82666e-25	4.55364e-23
		ENSG00000177697	13655.7	12387	11620.1	7343.77	3309.85	3480.8	1741.27	1958.23	CD151	-2.01786	6.56435e-28	6.95208e-26
		ENSG00000165626	10.9103	7.04608	10.6236	1.0594	0	0	0.746365	0	BEND7	-2.01548	0.000106082	0.000505836
		ENSG00000167306	3925.71	3743.23	3741.64	2717.37	867.41	839.112	650.084	1035.31	MYO5B	-2.01439	1.39246e-32	2.44641e-30
		ENSG00000173546	11785.1	11088.8	11117.6	1850.78	2085.52	2289.53	272.423	746.764	CSPG4	-2.01426	5.23336e-06	3.29012e-05
		ENSG00000165388	1509.58	1298.24	1299.27	1350.74	307.121	353.201	288.843	370.68		-2.012	7.79798e-47	4.65088e-44
		ENSG00000267764	27.7716	54.6071	38.2451	8.47522	10.3757	5.22486	8.21002	1.0807		-2.00432	3.52596e-08	3.27779e-07
		ENSG00000185585	12.8939	7.04608	10.6236	7.41581	1.03757	2.08994	0.746365	0	OLFML2A	-1.99401	3.52458e-05	0.000187867
		ENSG00000106688	3929.68	4123.72	4022.1	2966.33	960.791	837.023	665.011	1172.56	SLC1A1	-1.99346	8.7412e-30	1.08518e-27
		ENSG00000180672	17.8531	5.28456	7.43654	7.41581	2.07514	0	0	1.0807		-1.98923	9.37335e-05	0.000453152
		ENSG00000256043	115.054	97.7643	131.733	120.772	19.7139	36.574	17.9128	36.7438	CTSO	-1.98904	3.11784e-19	1.28245e-17
		ENSG00000181982	42.6492	42.2765	36.1203	40.2573	4.15028	3.13492	12.6882	12.9684	CCDC149	-1.9871	5.03373e-09	5.40941e-08
		ENSG00000257743	391.777	555.759	519.495	943.927	92.3438	83.5978	30.601	314.484	MGAM2	-1.98471	6.63667e-08	5.90088e-07
		ENSG00000250041	7.93473	12.3306	4.24945	3.17821	0	0	0	1.0807		-1.9825	0.000147858	0.000681941
		ENSG00000260912	329.291	306.504	320.833	104.881	75.7427	57.4735	62.6947	46.4701		-1.97923	5.18799e-21	2.55055e-19
		ENSG00000153292	3285.97	2806.98	3357.07	1939.76	598.679	597.724	932.21	627.887	ADGRF1	-1.97776	9.32706e-37	2.37515e-34
		ENSG00000149218	3232.41	2848.38	2898.12	4010.9	624.618	608.174	1072.53	856.996	ENDOD1	-1.96634	1.52698e-27	1.58025e-25
		ENSG00000135374	241.017	182.317	224.158	192.811	45.6531	43.8888	55.231	60.5192	ELF5	-1.96563	2.11368e-23	1.38053e-21
		ENSG00000264755	79.3473	64.2954	59.4923	12.7128	15.5636	17.7645	7.46365	4.3228	MIR3131	-1.96168	1.20043e-08	1.20112e-07
		ENSG00000198788	143.817	133.875	213.535	88.9898	28.0144	54.3385	20.8982	29.1789		-1.958	6.0261e-13	1.17132e-11
		ENSG00000249923	47.6084	46.6803	29.7462	36.0197	10.3757	11.4947	6.71729	5.4035	LOC284865	-1.95245	3.42742e-08	3.18879e-07
		ENSG00000119686	567.333	465.922	471.689	312.524	135.922	119.127	105.984	94.0209	FLVCR2	-1.94954	8.11123e-40	2.51826e-37
		ENSG00000130598	211.262	187.602	230.533	56.1483	47.7283	45.9788	32.0937	28.0982	TNNI2	-1.94931	1.41628e-14	3.4589e-13
		ENSG00000224649	36.6981	36.9919	38.2451	6.35641	4.15028	3.13492	10.4491	3.2421		-1.94866	2.91478e-06	1.91702e-05
		ENSG00000103723	19.8368	14.0922	33.9956	7.41581	3.11271	3.13492	3.73183	2.1614	AP3B2	-1.94758	8.01141e-06	4.88487e-05
		ENSG00000137648	1702.99	1496.41	1581.86	2883.69	485.583	527.711	340.342	521.978	TMPRSS4	-1.94368	7.57963e-33	1.36337e-30
		ENSG00000128268	224.156	181.436	201.849	172.683	50.841	49.1137	64.1874	30.2596	MGAT3	-1.94102	2.95762e-21	1.49959e-19
		ENSG00000260015	14.8776	7.04608	6.37418	12.7128	0	0	0.746365	2.1614		-1.93861	0.000207922	0.000931844
		ENSG00000136274	23.8042	23.7805	21.2473	12.7128	7.263	3.13492	1.49273	3.2421	NACAD	-1.93769	5.47634e-06	3.4324e-05
		ENSG00000070961	7118.45	8098.58	7713.81	4558.61	1851.03	1862.14	1147.16	1863.13	ATP2B1	-1.93694	1.21639e-22	7.29316e-21
		ENSG00000116833	886.706	988.212	898.759	579.493	188.838	169.285	171.664	300.435	NR5A2	-1.93537	7.68231e-18	2.77248e-16
		ENSG00000140297	18892.6	20039	18957.9	17451.5	5926.61	5466.25	3418.35	4426.55	GCNT3	-1.93171	1.62507e-40	5.41625e-38
		ENSG00000205978	5952.04	5451.02	5303.31	6880.82	1578.15	1737.79	793.386	1833.95	NYNRIN	-1.92666	9.67789e-25	7.33578e-23
		ENSG00000103056	2936.84	2053.93	2271.33	740.522	393.239	416.944	463.493	528.463	SMPD3	-1.92275	1.04867e-11	1.71603e-10
		ENSG00000213373	20.8287	22.019	20.1849	19.0692	6.22543	3.13492	2.2391	3.2421	LINC00671	-1.92185	1.30427e-05	7.63824e-05
		ENSG00000198910	12.8939	4.4038	12.7484	7.41581	2.07514	1.04497	0	1.0807	L1CAM	-1.91528	0.000125843	0.000590377
		ENSG00000088367	8100.37	6603.94	7305.87	5375.41	1657	1774.36	1338.23	2314.86	EPB41L1	-1.91321	4.53355e-26	4.0612e-24
		ENSG00000143153	25318.7	26443	24572.4	22985.8	7057.56	6824.71	3551.95	7825.35	ATP1B1	-1.91235	9.33833e-24	6.29892e-22
		ENSG00000187658	9.91841	5.28456	4.24945	12.7128	1.03757	0	0.746365	1.0807	C5orf52	-1.91065	0.000136801	0.0006356
		ENSG00000126878	786.53	701.965	668.226	223.534	171.199	143.161	134.346	112.393	AIF1L	-1.9078	1.99216e-17	6.86176e-16
		ENSG00000175591	1587.94	1263.89	1264.21	1152.63	253.167	257.063	372.436	460.378	P2RY2	-1.90729	3.71801e-20	1.67525e-18
		ENSG00000113231	61.4942	73.103	72.2407	50.8513	19.7139	12.5397	11.1955	17.2912	PDE8B	-1.90688	1.13999e-10	1.58705e-09
		ENSG00000253348	82.3228	73.9838	67.9912	28.6039	13.4884	14.6296	13.4346	16.2105		-1.90459	2.51979e-10	3.32026e-09
		ENSG00000101846	534.602	483.537	527.994	607.037	101.682	82.5528	170.918	183.719	STS	-1.90277	6.98979e-16	2.01805e-14
		ENSG00000069702	319.373	328.523	360.141	215.059	46.6907	49.1137	53.7383	90.7788	TGFBR3	-1.90108	1.63848e-06	1.12905e-05
		ENSG00000260792	26.7797	27.3035	35.058	7.41581	3.11271	5.22486	6.71729	3.2421	LOC101929634	-1.89893	1.86147e-06	1.27035e-05
		ENSG00000058668	4521.8	3808.4	4261.14	3292.62	1039.65	1159.92	525.441	1370.33	ATP2B4	-1.8973	1.05041e-18	4.12591e-17
		ENSG00000076641	644.697	787.399	764.901	748.997	144.222	152.566	188.83	306.919	PAG1	-1.89725	2.49196e-27	2.52133e-25
		ENSG00000102265	4063.57	3575	3519.61	2201.44	775.066	754.47	1110.59	748.925	TIMP1	-1.89711	9.44346e-26	8.16895e-24
		ENSG00000103342	10980.7	11712.3	11103.8	13634.5	3157.33	3071.17	2325.67	4125.03	GSPT1	-1.89398	8.97254e-65	1.69461e-61
		ENSG00000264491	9.91841	6.16532	11.686	7.41581	0	3.13492	0.746365	0		-1.8896	0.000253361	0.00111542
		ENSG00000095637	120.013	92.4798	101.987	72.0393	22.8266	20.8994	18.6591	33.5017	SORBS1	-1.88726	3.31223e-13	6.73863e-12
		ENSG00000105409	213.246	187.602	168.916	59.3265	40.4653	47.0237	37.3183	28.0982	ATP1A3	-1.88191	2.39774e-15	6.51587e-14
		ENSG00000232453	20.8287	37.8727	36.1203	21.188	3.11271	3.13492	9.70275	5.4035	LOC105378753	-1.88087	1.12398e-05	6.66856e-05
		ENSG00000183578	241.017	247.493	219.909	108.059	41.5028	40.7539	77.622	36.7438	TNFAIP8L3	-1.87592	8.99187e-13	1.7068e-11
		ENSG00000084234	25986.2	25202.9	24610.7	19930.5	6273.16	6137.12	5914.94	7393.07	APLP2	-1.87485	5.73678e-62	7.64814e-59
		ENSG00000203685	21.8205	4.4038	10.6236	0	0	1.04497	0.746365	0	STUM	-1.87458	0.000338669	0.00145481
		ENSG00000105711	20.8287	28.1843	19.1225	10.594	6.22543	5.22486	3.73183	1.0807	SCN1B	-1.87339	5.21767e-06	3.28208e-05
		ENSG00000121753	494.929	339.092	392.012	59.3265	70.5548	104.497	70.9047	37.8245	ADGRB2	-1.86875	1.02594e-08	1.04036e-07
		ENSG00000006210	132.907	101.287	116.86	24.3662	17.6387	12.5397	44.0355	3.2421	CX3CL1	-1.86804	1.85309e-06	1.26578e-05
		ENSG00000109956	503.855	405.149	488.687	132.425	79.893	84.6427	129.121	63.7613	B3GAT1	-1.86409	7.51593e-12	1.25992e-10
		ENSG00000251675	43.641	48.4418	44.6192	27.5445	12.4509	14.6296	6.71729	6.4842		-1.86403	9.50835e-10	1.14626e-08
		ENSG00000138131	552.456	369.038	524.807	206.583	104.795	104.497	102.998	95.1016	LOXL4	-1.86367	1.05461e-16	3.35228e-15
		ENSG00000205076	22.8124	21.1382	28.6838	4.23761	0	8.35978	1.49273	2.1614	LGALS7	-1.86251	6.57517e-05	0.000328744
		ENSG00000170373	78.3555	77.5068	45.6816	503.216	19.7139	11.4947	11.1955	132.926	CST1	-1.8586	2.64969e-10	3.48131e-09
		ENSG00000149177	2177.09	1978.19	2118.35	1771.32	485.583	475.462	550.071	689.487	PTPRJ	-1.85683	8.80702e-41	3.02428e-38
		ENSG00000214797	9.91841	3.52304	9.56126	22.2474	0	1.04497	0.746365	4.3228		-1.85682	0.0001766	0.000801775
		ENSG00000179058	13.8858	14.9729	25.4967	14.8316	2.07514	4.17989	2.2391	5.4035	C9orf50	-1.84311	5.15335e-06	3.24612e-05
		ENSG00000243232	37.69	29.9458	21.2473	12.7128	4.15028	5.22486	8.21002	2.1614	PCDHAC2	-1.84293	1.86099e-05	0.000105576
		ENSG00000152779	51.5757	57.2494	48.8687	14.8316	11.4133	6.26983	7.46365	11.8877	SLC16A12	-1.84237	3.48011e-07	2.73486e-06
		ENSG00000090539	295.569	212.263	246.468	121.831	86.1184	63.7433	32.0937	36.7438	CHRD	-1.84003	3.09575e-11	4.67436e-10
		ENSG00000255202	16.8613	13.2114	23.372	4.23761	1.03757	0	2.2391	4.3228	LOC105376617	-1.8375	0.000233352	0.00103376
		ENSG00000260023	63.4778	81.9106	97.7374	70.9799	9.33814	22.9894	20.8982	27.0175		-1.83737	8.39231e-12	1.39343e-10
		ENSG00000272142	34.7144	34.3496	42.4945	23.3068	6.22543	11.4947	7.46365	6.4842	LYRM4-AS1	-1.83618	1.35673e-08	1.34334e-07
		ENSG00000261379	26.7797	15.8537	36.1203	23.3068	5.18786	11.4947	0.746365	2.1614		-1.83616	3.5838e-05	0.00019062
		ENSG00000144647	828.188	718.7	662.914	423.761	164.974	216.309	155.99	164.266	POMGNT2	-1.8345	8.6451e-30	1.0825e-27
		ENSG00000158089	5831.04	5327.71	5401.05	3839.27	1357.14	1419.07	1337.49	1469.75	GALNT14	-1.82747	2.47493e-40	8.01312e-38
		ENSG00000092758	3569.64	2491.67	2637.85	929.096	489.734	606.084	740.394	542.512	COL9A3	-1.81579	7.17707e-13	1.37499e-11
		ENSG00000145901	8291.79	6841.74	6991.41	9338.63	2119.76	2198.62	1718.88	2844.4	TNIP1	-1.81484	3.92231e-63	6.34966e-60
		ENSG00000164237	3536.91	3856.85	3539.79	2602.95	1045.87	991.678	574.701	1070.97	CMBL	-1.8148	5.92331e-24	4.09286e-22
		ENSG00000234143	10.9103	17.6152	24.4343	5.29701	5.18786	1.04497	2.2391	1.0807		-1.8139	0.000120173	0.000566473
		ENSG00000112378	13196.4	12587.8	12658	7710.33	3631.5	3311.52	2102.51	3382.59	PERP	-1.81218	4.34011e-24	3.06431e-22
		ENSG00000235124	9.91841	17.6152	8.4989	46.6137	0	4.17989	2.2391	10.807		-1.81132	8.13426e-06	4.95311e-05
		ENSG00000204175	239.034	162.941	193.35	69.9205	49.8034	52.2486	22.391	34.5824	GPRIN2	-1.80911	3.32089e-08	3.09859e-07
		ENSG00000187123	30.7471	24.6613	20.1849	30.7227	4.15028	7.3148	8.95638	1.0807	LYPD6	-1.80849	5.9355e-05	0.000300945
		ENSG00000136938	10588.9	11555.6	10755.4	11170.3	3300.51	3207.02	1762.91	4004	ANP32B	-1.80756	1.65942e-25	1.41388e-23
		ENSG00000140254	12.8939	10.5691	19.1225	18.0098	2.07514	5.22486	2.98546	1.0807	DUOXA1	-1.8057	2.54574e-05	0.00014004
		ENSG00000039523	2789.06	2198.38	2432.81	1291.41	735.638	689.681	358.255	528.463	FAM65A	-1.80487	6.71553e-19	2.66551e-17
		ENSG00000186529	7.93473	21.1382	12.7484	22.2474	3.11271	2.08994	1.49273	4.3228	CYP4F3	-1.80347	0.000102315	0.000489729
		ENSG00000115705	48.6002	51.0841	61.617	48.7325	17.6387	13.5846	16.42	6.4842	TPO	-1.80171	6.26781e-10	7.77524e-09
		ENSG00000102854	269.781	224.594	230.533	109.118	59.1416	72.1031	26.8691	54.035	MSLN	-1.80074	1.63722e-10	2.22725e-09
		ENSG00000167117	12.8939	17.6152	18.0602	88.9898	6.22543	5.22486	3.73183	7.5649	LINC00483	-1.8006	5.37028e-05	0.000274931
		ENSG00000168913	20.8287	14.0922	7.43654	5.29701	1.03757	3.13492	2.2391	0	ENHO	-1.8001	0.000208771	0.000935465
		ENSG00000163501	1579.01	1623.24	1340.7	763.829	450.306	505.766	177.635	262.61	IHH	-1.7979	4.4514e-15	1.17174e-13
		ENSG00000182795	5203.2	4378.26	4751.95	3807.49	1060.4	1062.74	1430.78	1564.85	C1orf116	-1.79778	3.4466e-34	6.92448e-32
		ENSG00000105323	20755.3	20378.1	18952.5	25499.8	6424.64	6450.61	3310.88	7708.64	HNRNPUL1	-1.79752	2.15621e-25	1.81667e-23
		ENSG00000165548	299.536	236.924	269.84	179.039	53.9537	73.148	102.252	41.0666	TMEM63C	-1.79701	3.96769e-20	1.7842e-18
		ENSG00000130433	16.8613	17.6152	32.9332	1.0594	5.18786	1.04497	0.746365	1.0807	CACNG6	-1.79392	0.000419447	0.0017575
		ENSG00000170786	595.105	633.266	639.542	244.722	135.922	157.791	183.606	95.1016	SDR16C5	-1.79112	4.50804e-28	4.84219e-26
		ENSG00000135678	37.69	28.1843	29.7462	20.1286	5.18786	7.3148	4.47819	10.807	CPM	-1.78998	6.78758e-08	6.03033e-07
		ENSG00000099194	21226.4	22235.7	21043.3	48451.7	7296.2	7084.91	3036.96	13895.6	SCD	-1.78875	4.96784e-18	1.83972e-16
		ENSG00000088881	62.486	57.2494	90.3008	28.6039	7.263	12.5397	28.3619	8.6456	EBF4	-1.78867	6.27246e-08	5.59215e-07
		ENSG00000230847	147.784	119.783	133.858	112.297	34.2398	34.4841	28.3619	46.4701		-1.7881	3.31479e-18	1.24588e-16
		ENSG00000243775	5.95105	7.04608	4.24945	7.41581	0	1.04497	0	1.0807	OSTCP1	-1.78456	0.000567872	0.00231521
		ENSG00000203724	49.5921	44.9187	37.1827	6.35641	9.33814	5.22486	4.47819	7.5649	C1orf53	-1.78424	1.51687e-05	8.77669e-05
		ENSG00000183044	45.6247	41.3957	50.9934	18.0098	8.30057	7.3148	5.97092	16.2105	ABAT	-1.78379	5.68876e-07	4.29195e-06
		ENSG00000164120	440.378	546.071	443.005	465.077	114.133	94.0475	164.947	154.54	HPGD	-1.78362	2.69206e-22	1.54855e-20
		ENSG00000160179	346.153	376.084	294.274	743.7	146.298	118.082	70.1583	122.119	ABCG1	-1.78274	8.86307e-15	2.22944e-13
		ENSG00000164530	27.7716	17.6152	10.6236	8.47522	0	6.26983	2.2391	2.1614	PI16	-1.78082	0.00018806	0.000850059
		ENSG00000089356	642.713	700.204	643.792	520.166	203.364	247.658	97.0275	123.2	FXYD3	-1.7804	5.03951e-11	7.37825e-10
		ENSG00000101210	3688.66	2852.78	2995.86	417.404	619.43	635.343	514.245	408.505	EEF1A2	-1.77867	1.08357e-06	7.74456e-06
		ENSG00000163638	21.8205	18.496	14.8731	9.53462	1.03757	1.04497	4.47819	4.3228	ADAMTS9	-1.7785	0.000128147	0.000599694
		ENSG00000114812	1451.06	1245.39	1463.94	1256.45	367.3	416.944	376.168	392.294	VIPR1	-1.77518	2.57779e-43	1.06224e-40
		ENSG00000230067	19.8368	29.0651	22.3096	39.1979	9.33814	3.13492	4.47819	9.72631		-1.77435	3.78744e-07	2.95588e-06
		ENSG00000156222	14.8776	16.7344	12.7484	16.9504	0	4.17989	3.73183	3.2421	SLC28A1	-1.77158	0.000153755	0.000707123
		ENSG00000272549	23.8042	36.9919	29.7462	41.3167	6.22543	4.17989	6.71729	12.9684	LOC401286	-1.76867	8.17349e-06	4.97299e-05
		ENSG00000169903	48940.4	47598.9	47582.2	7860.76	8861.9	8692.08	11053.7	7315.26	TM4SF4	-1.76815	1.93537e-11	3.01881e-10
		ENSG00000176463	124.972	97.7643	112.61	63.5641	16.6011	12.5397	39.5573	32.421	SLCO3A1	-1.76701	8.43888e-08	7.37028e-07
		ENSG00000157193	8596.29	7560.44	8580.7	7731.52	2473.57	2330.29	1827.85	2696.35	LRP8	-1.76597	7.25407e-32	1.17433e-29
		ENSG00000214650	25.7879	37.8727	25.4967	25.4256	2.07514	9.40475	5.22456	10.807		-1.76582	2.04134e-06	1.38352e-05
		ENSG00000112293	18.845	28.1843	21.2473	7.41581	3.11271	3.13492	3.73183	4.3228	GPLD1	-1.76384	8.76316e-05	0.000426198
		ENSG00000256008	9.91841	21.1382	26.5591	8.47522	1.03757	4.17989	0.746365	5.4035		-1.75958	0.00019255	0.000868103
		ENSG00000111405	23.8042	20.2575	50.9934	9.53462	1.03757	5.22486	6.71729	6.4842	ENDOU	-1.75629	0.000128546	0.000601316
		ENSG00000091409	34062.8	32921	34876.3	26990.4	9186.66	8622.06	6508.3	13028.9	ITGA6	-1.75587	1.10612e-21	5.9023e-20
		ENSG00000143553	808.351	826.152	808.458	866.591	253.167	218.399	161.215	322.049	SNAPIN	-1.75559	1.88683e-22	1.11073e-20
		ENSG00000257241	22.8124	32.5881	37.1827	3.17821	6.22543	6.26983	5.22456	3.2421		-1.75233	7.86798e-06	4.80387e-05
		ENSG00000150593	2200.9	2362.2	2306.39	2771.4	809.306	701.176	367.958	891.578	PDCD4	-1.75087	4.8527e-21	2.3909e-19
		ENSG00000224259	9.91841	14.0922	10.6236	26.485	3.11271	1.04497	2.98546	4.3228	LINC01133	-1.75082	9.56079e-05	0.00046123
		ENSG00000267750	13.8858	9.68835	7.43654	3.17821	2.07514	1.04497	0.746365	0		-1.75049	0.000506543	0.00208809
		ENSG00000265893	31.7389	28.1843	27.6214	16.9504	6.22543	7.3148	1.49273	9.72631		-1.75047	9.6214e-06	5.781e-05
		ENSG00000120992	6219.84	6725.48	6667.39	4967.54	1979.69	1893.49	1690.52	1655.63	LYPLA1	-1.74771	4.57011e-91	2.07154e-87
		ENSG00000169896	367.973	236.044	337.831	105.94	28.0144	31.3492	75.3829	69.1648	ITGAM	-1.74734	7.90723e-05	0.000388488
		ENSG00000253125	10.9103	6.16532	6.37418	5.29701	1.03757	0	0	1.0807		-1.74666	0.000844167	0.00331121
		ENSG00000214269	3.96737	11.4499	8.4989	16.9504	1.03757	1.04497	1.49273	2.1614		-1.74479	0.000368274	0.00156596
		ENSG00000224950	52.5676	72.2223	56.3052	16.9504	6.22543	12.5397	16.42	11.8877		-1.74209	2.72076e-07	2.17048e-06
		ENSG00000205177	21.8205	18.496	24.4343	8.47522	2.07514	2.08994	4.47819	6.4842	C11orf91	-1.74176	7.28507e-05	0.000360028
		ENSG00000133027	429.467	376.965	378.201	280.742	116.208	128.532	72.3974	106.989	PEMT	-1.73834	2.45397e-24	1.78832e-22
		ENSG00000138100	163.654	169.106	155.105	117.594	25.9393	44.9338	41.0501	60.5192	TRIM54	-1.73726	1.97686e-13	4.14081e-12
		ENSG00000198643	208.287	214.905	206.098	740.522	74.7051	66.8782	54.4846	176.154	FAM3D	-1.73427	2.55793e-18	9.72699e-17
		ENSG00000164749	3649.98	4114.91	4086.91	2601.89	960.791	982.274	935.942	1273.07	HNF4G	-1.73421	3.88115e-22	2.17729e-20
		ENSG00000074527	4088.37	3197.16	3460.11	1692.92	608.017	600.859	994.158	1232	NTN4	-1.73347	6.71513e-10	8.28931e-09
		ENSG00000117143	2374.47	2656.37	2484.87	3096.63	874.673	808.808	499.318	928.322	UAP1	-1.72862	2.14934e-26	1.94851e-24
		ENSG00000230716	71.4126	37.8727	35.058	118.653	7.263	15.6746	10.4491	41.0666		-1.72858	1.10548e-08	1.11304e-07
		ENSG00000113722	38.6818	53.7263	44.6192	98.5244	9.33814	17.7645	5.22456	32.421	CDX1	-1.72805	2.56211e-09	2.88607e-08
		ENSG00000128567	20541	16571.5	18763.4	11265.7	4745.85	4538.31	3937.08	6365.33	PODXL	-1.72704	4.48865e-21	2.23094e-19
		ENSG00000254285	2648.22	2188.69	2312.76	2529.85	576.89	595.634	654.562	1132.57		-1.72643	3.11864e-25	2.51533e-23
		ENSG00000196622	11.9021	11.4499	11.686	3.17821	1.03757	1.04497	2.98546	1.0807		-1.72596	0.000427872	0.00178997
		ENSG00000136059	79.3473	63.4147	77.5525	60.3859	12.4509	26.1243	11.1955	25.9368	VILL	-1.72303	8.63628e-09	8.86069e-08
		ENSG00000223947	17.8531	17.6152	24.4343	5.29701	3.11271	1.04497	1.49273	6.4842		-1.72299	0.000193679	0.000872845
		ENSG00000180176	26.7797	16.7344	14.8731	12.7128	3.11271	4.17989	2.2391	6.4842	TH	-1.72295	3.37567e-05	0.000180994
		ENSG00000136689	1353.86	1123.85	1262.09	887.779	201.289	219.444	509.021	362.035	IL1RN	-1.72103	8.85019e-13	1.68414e-11
		ENSG00000169299	2164.2	2179	2195.9	2324.33	748.089	669.827	464.985	741.361	PGM2	-1.71878	2.75593e-27	2.77601e-25
		ENSG00000186204	59.5105	48.4418	48.8687	92.168	17.6387	18.8095	14.1809	15.1298	CYP4F12	-1.71726	5.24955e-08	4.74385e-07
		ENSG00000010292	12283	12702.3	11740.2	12268.9	3819.3	3738.91	3111.6	4067.76	NCAPD2	-1.717	2.44773e-61	2.91975e-58
		ENSG00000165507	1542.31	1259.49	1465	503.216	333.06	350.066	57.4701	278.821	C10orf10	-1.7169	4.96813e-05	0.000256487
		ENSG00000100031	439.386	358.469	389.887	336.89	135.922	144.206	50.0065	105.909	GGT1	-1.71418	9.91921e-14	2.13494e-12
		ENSG00000014914	1626.62	1697.22	1699.78	1330.61	554.063	560.105	385.124	410.666	MTMR11	-1.71125	4.70231e-44	2.17496e-41
		ENSG00000185477	1168.39	1484.08	1497.93	1061.52	377.676	399.179	241.076	533.866	GPRIN3	-1.70992	4.79812e-19	1.92468e-17
		ENSG00000080031	7717.52	6540.52	6894.73	4203.71	1951.67	1994.85	1591.25	1974.44	PTPRH	-1.7015	1.68538e-27	1.73625e-25
		ENSG00000158470	8201.54	8327.58	8092.02	6312.98	2266.06	2271.77	2577.94	2221.92	B4GALT5	-1.70124	5.88269e-49	4.16641e-46
		ENSG00000270930	8.92657	9.68835	10.6236	1.0594	0	0	2.2391	0		-1.70101	0.0011224	0.00428829
		ENSG00000266999	47.6084	71.3415	61.617	46.6137	4.15028	18.8095	12.6882	20.5333		-1.70081	7.14684e-06	4.39655e-05
		ENSG00000164379	6656.25	5674.73	5743.13	6856.45	1757.65	1745.1	1360.62	2936.26	FOXQ1	-1.69973	2.67109e-36	6.50941e-34
		ENSG00000140287	2.97552	3.52304	5.31181	10.594	0	0	0	1.0807	HDC	-1.69892	0.000935554	0.00363196
		ENSG00000166546	13.8858	4.4038	11.686	9.53462	2.07514	0	2.2391	0	BEAN1	-1.69743	0.00114704	0.00437285
		ENSG00000130700	6.94289	3.52304	7.43654	5.29701	0	1.04497	0	0	GATA5	-1.69706	0.00117147	0.00446221
		ENSG00000131620	4201.44	3457.86	3609.91	3481.19	974.279	1003.17	1316.59	1119.61	ANO1	-1.69474	1.6822e-25	1.42792e-23
		ENSG00000197291	15.8695	18.496	8.4989	1.0594	1.03757	1.04497	0	3.2421	RAMP2-AS1	-1.69413	0.00106837	0.00409151
		ENSG00000143515	190.434	171.748	198.662	133.485	54.9913	56.4285	26.8691	54.035	ATP8B2	-1.694	1.44461e-08	1.42474e-07
		ENSG00000140323	441.369	311.789	373.952	210.821	104.795	102.407	77.622	103.747	DISP2	-1.69384	5.314e-17	1.76031e-15
		ENSG00000103089	4693.39	3803.12	4032.73	3101.93	1246.12	1353.24	794.132	1241.72	FA2H	-1.69346	1.29411e-21	6.78927e-20
		ENSG00000136999	91.2494	77.5068	75.4277	20.1286	12.4509	8.35978	17.9128	18.3719	NOV	-1.69126	5.07404e-05	0.000261062
		ENSG00000132561	356.071	383.13	342.081	133.485	80.9306	89.8676	108.223	50.7929	MATN2	-1.68951	1.70171e-09	1.97884e-08
		ENSG00000188488	281.683	233.401	230.533	402.573	125.546	95.0924	29.1082	65.9227	SERPINA5	-1.68944	2.29421e-08	2.19207e-07
		ENSG00000172086	733.963	871.071	810.583	690.73	293.633	254.973	211.221	194.526	KRCC1	-1.68921	2.22489e-43	9.51413e-41
		ENSG00000157782	338.218	324.12	327.208	354.9	116.208	126.442	27.6155	104.828	CABP1	-1.68852	7.28826e-09	7.58756e-08
		ENSG00000249279	11.9021	3.52304	6.37418	3.17821	0	1.04497	0	1.0807		-1.68747	0.00124815	0.00470917
		ENSG00000224739	27.7716	30.8266	33.9956	49.7919	12.4509	9.40475	0.746365	9.72631		-1.68728	6.9349e-05	0.00034445
		ENSG00000149043	691.313	546.071	589.611	233.068	150.448	197.5	155.244	90.7788	SYT8	-1.68705	5.31291e-17	1.76031e-15
		ENSG00000110427	74.3881	52.8456	49.931	45.5543	23.8641	14.6296	16.42	8.6456	KIAA1549L	-1.68681	3.77206e-09	4.11801e-08
		ENSG00000229688	7.93473	7.92684	3.18709	2.1188	0	0	0	0	ISPD-AS1	-1.68555	0.00079647	0.00314098
		ENSG00000213713	139.85	150.61	123.234	193.871	37.3526	36.574	32.8401	78.8911		-1.6848	2.99527e-15	8.05277e-14
		ENSG00000146648	5030.62	4953.39	5207.7	7037.61	1414.21	1615.53	1544.98	2251.1	EGFR	-1.68205	4.98665e-40	1.56969e-37
		ENSG00000082781	14397.6	12481.2	12472.1	9678.7	3796.47	3807.88	3569.12	3804.07	ITGB5	-1.68019	6.20739e-55	5.41093e-52
		ENSG00000101843	1475.86	1644.38	1560.61	252.138	388.052	369.92	241.076	252.884	PSMD10	-1.67988	3.25171e-09	3.58796e-08
		ENSG00000163624	2363.56	2244.18	2377.57	1678.09	779.216	624.893	520.216	711.101	CDS1	-1.67973	3.33952e-30	4.34982e-28
		ENSG00000231226	142.825	171.748	168.916	30.7227	37.3526	21.9444	32.0937	34.5824	TRIM31-AS1	-1.67842	8.72149e-08	7.59494e-07
		ENSG00000148734	282.675	319.716	335.707	419.523	111.02	122.262	29.8546	121.038	NPFFR1	-1.67617	4.31993e-09	4.68006e-08
		ENSG00000156482	6878.42	6934.22	6497.41	10449.9	2428.95	2469.27	1011.32	3302.62	RPL30	-1.67374	2.76342e-15	7.46485e-14
		ENSG00000196420	43.641	49.3225	60.5547	56.1483	17.6387	17.7645	6.71729	18.3719	S100A5	-1.67309	2.89036e-09	3.22061e-08
		ENSG00000240668	361.03	268.632	244.343	140.9	78.8554	68.9681	97.0275	54.035		-1.67298	1.64053e-18	6.2912e-17
		ENSG00000162434	6122.64	5962.74	5933.29	5297.01	1837.54	1794.22	1380.78	2231.65	JAK1	-1.67094	9.80799e-34	1.8999e-31
		ENSG00000108846	25733.3	24280.8	26205.3	16185.5	7286.86	7428.71	5833.59	7591.92	ABCC3	-1.67081	1.22176e-30	1.65808e-28
		ENSG00000254978	10.9103	22.019	23.372	5.29701	3.11271	4.17989	3.73183	2.1614		-1.66994	0.000159385	0.000730497
		ENSG00000002933	54.5513	51.0841	55.2429	33.9009	7.263	7.3148	21.6446	14.0491	TMEM176A	-1.6698	1.13551e-06	8.09535e-06
		ENSG00000224520	310.446	262.466	274.09	484.147	65.367	63.7433	87.3247	223.705		-1.66927	1.18547e-17	4.18527e-16
		ENSG00000167600	2929.9	2707.45	2608.1	7484.67	1099.83	1151.56	325.415	1373.57	CYP2S1	-1.6686	8.76047e-07	6.38005e-06
		ENSG00000236253	11.9021	3.52304	7.43654	25.4256	0	5.22486	0.746365	1.0807	SLC25A3P1	-1.66827	0.000371565	0.00157847
		ENSG00000153246	1674.23	1801.15	1881.44	1011.73	505.297	496.362	429.906	486.315	PLA2R1	-1.66787	4.28156e-29	5.10723e-27
		ENSG00000205231	13.8858	27.3035	44.6192	18.0098	10.3757	5.22486	4.47819	5.4035	TTLL10-AS1	-1.6651	1.56293e-05	9.0179e-05
		ENSG00000112782	534.602	373.442	429.194	537.117	72.63	68.9681	233.612	158.863	CLIC5	-1.66485	6.93715e-09	7.24199e-08
		ENSG00000162571	99.1841	95.122	109.423	111.237	28.0144	30.3042	20.1519	47.5508	TTLL10	-1.6642	2.61774e-14	6.14802e-13
		ENSG00000264868	11.9021	19.3767	33.9956	7.41581	3.11271	1.04497	5.22456	5.4035		-1.66186	0.00026431	0.00116114
		ENSG00000183876	18.845	14.0922	10.6236	3.17821	2.07514	3.13492	1.49273	2.1614	ARSI	-1.66083	0.000180514	0.000818235
		ENSG00000166813	1250.71	942.413	999.683	354.9	241.754	272.738	350.792	161.024	KIF7	-1.65934	7.54859e-16	2.16285e-14
		ENSG00000116574	1617.69	1444.45	1504.31	2018.16	447.193	436.798	550.817	613.838	RHOU	-1.6593	1.68516e-47	1.09121e-44
		ENSG00000207607	61.4942	50.2033	52.0558	34.9603	12.4509	13.5846	14.1809	15.1298	MIR200A	-1.65831	9.36619e-09	9.56195e-08
		ENSG00000248568	48.6002	32.5881	35.058	51.9107	8.30057	5.22486	14.9273	18.3719		-1.65824	1.04344e-07	8.91384e-07
		ENSG00000111087	174.564	202.575	199.724	154.673	70.5548	83.5978	32.0937	34.5824	GLI1	-1.65728	5.90558e-12	1.00635e-10
		ENSG00000135362	3403.01	2851.02	3075.54	2290.43	631.881	630.118	1257.63	983.438	PRR5L	-1.65631	4.15092e-16	1.22976e-14
		ENSG00000127946	1287.41	1144.99	1200.47	502.157	287.407	236.164	388.856	292.87	HIP1	-1.65604	8.58665e-15	2.1641e-13
		ENSG00000102760	156.711	132.995	146.606	220.356	49.8034	39.7089	32.0937	78.8911	RGCC	-1.65494	1.58978e-11	2.51964e-10
		ENSG00000248445	5.95105	5.28456	7.43654	5.29701	0	0	0	2.1614	SEMA6A-AS1	-1.65437	0.00138701	0.0051745
		ENSG00000163293	4438.49	4456.64	4874.12	3331.82	1469.2	1274.87	982.963	1555.13	NIPAL1	-1.65418	1.84415e-23	1.215e-21
		ENSG00000162437	1683.15	1871.61	1818.76	2156.94	615.28	559.06	485.137	725.15	RAVER2	-1.65378	1.94626e-73	5.51375e-70
		ENSG00000197822	1427.26	1364.3	1327.95	1311.54	437.855	403.359	358.255	518.736	OCLN	-1.65327	1.63823e-55	1.48515e-52
		ENSG00000232352	8.92657	7.04608	6.37418	8.47522	1.03757	1.04497	2.2391	0	SEMA3B-AS1	-1.64996	0.000360941	0.00153824
		ENSG00000272198	24.796	17.6152	21.2473	12.7128	1.03757	2.08994	5.97092	7.5649		-1.64981	0.000167936	0.000765047
		ENSG00000170537	1859.7	1664.64	1826.2	1062.58	484.546	486.957	448.565	529.543	TMC7	-1.6493	1.84909e-21	9.6119e-20
		ENSG00000078967	561.382	521.41	586.424	675.898	190.913	188.095	134.346	229.109	UBE2D4	-1.6476	2.10917e-39	6.12849e-37
		ENSG00000185668	64.4697	49.3225	67.9912	67.8017	22.8266	26.1243	5.97092	17.2912	POU3F1	-1.64674	1.64579e-08	1.60985e-07
		ENSG00000110080	2762.28	2555.96	2639.97	3956.87	1029.27	1085.73	623.961	911.031	ST3GAL4	-1.64619	2.13503e-20	9.89536e-19
		ENSG00000144668	36.6981	18.496	31.8709	50.8513	10.3757	6.26983	5.97092	16.2105	ITGA9	-1.64559	1.31308e-06	9.23638e-06
		ENSG00000255438	15.8695	6.16532	5.31181	2.1188	0	0	1.49273	1.0807		-1.64398	0.00146994	0.00544182
		ENSG00000107738	1219.96	895.732	1040.05	975.709	250.055	299.907	346.313	392.294	C10orf54	-1.64358	3.01188e-25	2.44664e-23
		ENSG00000010438	1796.22	1654.07	1701.9	1143.09	385.976	442.023	453.79	694.89	PRSS3	-1.64235	2.05281e-17	7.04536e-16
		ENSG00000138623	1154.5	779.472	943.378	452.365	260.43	233.029	212.714	291.789	SEMA7A	-1.63971	9.79242e-14	2.11166e-12
		ENSG00000003989	2124.52	2333.13	2327.64	1007.49	619.43	630.118	385.871	681.922	SLC7A2	-1.63865	1.76269e-13	3.71625e-12
		ENSG00000175029	7438.81	7576.29	7150.76	6193.26	2376.04	2522.56	1764.41	2286.76	CTBP2	-1.63846	5.02932e-42	1.83846e-39
		ENSG00000089558	14.8776	9.68835	10.6236	2.1188	1.03757	3.13492	1.49273	0	KCNH4	-1.63788	0.00113045	0.00431394
		ENSG00000176532	1198.14	1012.87	998.621	1526.6	347.586	360.515	246.3	573.852	PRR15	-1.63755	2.9199e-33	5.46914e-31
		ENSG00000185303	127.948	117.141	108.361	103.821	36.315	31.3492	35.8255	34.5824	SFTPA2	-1.63698	1.34939e-11	2.16538e-10
		ENSG00000173175	45.6247	58.1301	75.4277	62.5047	24.9017	22.9894	12.6882	7.5649	ADCY5	-1.63441	2.81588e-06	1.86224e-05
		ENSG00000100600	3343.5	3374.19	3028.8	2444.04	1124.73	1003.17	787.415	934.806	LGMN	-1.63352	1.73701e-42	6.67249e-40
		ENSG00000132031	61.4942	71.3415	69.0536	19.0692	18.6763	21.9444	1.49273	8.6456	MATN3	-1.63258	0.000116103	0.000549001
		ENSG00000264215	17.8531	21.1382	18.0602	62.5047	8.30057	1.04497	3.73183	20.5333		-1.63257	2.39756e-06	1.60812e-05
		ENSG00000162897	5.95105	6.16532	6.37418	5.29701	1.03757	0	0.746365	1.0807	FCAMR	-1.6307	0.00179614	0.00651249
		ENSG00000100522	1712.91	1930.62	1939.87	1879.38	659.895	666.692	459.761	590.063	GNPNAT1	-1.62959	2.92723e-38	7.89795e-36
		ENSG00000078114	148.776	129.472	174.227	77.3363	20.7514	21.9444	60.4556	45.3894	NEBL	-1.62743	2.19291e-08	2.10326e-07
		ENSG00000250221	46.6165	33.4689	41.4321	86.871	8.30057	10.4497	11.1955	34.5824		-1.62725	2.0646e-09	2.37523e-08
		ENSG00000162896	49.5921	63.4147	48.8687	48.7325	9.33814	6.26983	30.601	6.4842	PIGR	-1.62653	3.49403e-05	0.000186435
		ENSG00000064195	25.7879	24.6613	29.7462	5.29701	5.18786	5.22486	9.70275	0	DLX3	-1.62629	0.00013434	0.000625705
		ENSG00000132911	1063.25	972.359	1040.05	729.928	228.266	251.838	370.943	337.179	NMUR2	-1.62433	2.57529e-22	1.49274e-20
		ENSG00000260807	79.3473	71.3415	67.9912	13.7722	20.7514	16.7196	15.6737	9.72631	LMF1	-1.6236	3.30819e-07	2.60698e-06
		ENSG00000108823	4.95921	9.68835	4.24945	1.0594	0	0	0	1.0807	SGCA	-1.62338	0.00189753	0.00683281
		ENSG00000251023	14.8776	14.9729	18.0602	12.7128	5.18786	1.04497	2.2391	6.4842		-1.6233	0.000154001	0.000708112
		ENSG00000196975	26400.8	28083	26242.5	12837.8	8022.5	7459.01	5029.01	7715.12	ANXA4	-1.62293	1.05008e-16	3.34256e-15
		ENSG00000230105	7.93473	6.16532	7.43654	4.23761	0	0	2.2391	0		-1.62277	0.00186878	0.00674965
		ENSG00000267221	50.5839	51.0841	52.0558	34.9603	19.7139	18.8095	8.95638	9.72631	ZNF385C	-1.62201	8.31649e-10	1.01064e-08
		ENSG00000132470	29022.3	23702.1	24574.6	19568.2	7729.91	8473.68	6223.94	8394.88	ITGB4	-1.62186	7.35923e-34	1.43784e-31
		ENSG00000250432	21.8205	18.496	31.8709	25.4256	4.15028	5.22486	7.46365	8.6456	LINC01598	-1.62123	6.68733e-06	4.13538e-05
		ENSG00000179750	1014.65	912.467	1032.62	459.78	215.815	223.624	351.538	240.996	APOBEC3B	-1.62098	1.58379e-13	3.35467e-12
		ENSG00000119125	4249.05	4490.11	4543.72	3251.3	1329.13	1227.84	1468.1	1234.16	GDA	-1.61987	2.52609e-44	1.19274e-41
		ENSG00000097021	1741.67	1566.87	1536.18	1570.03	517.748	578.914	337.357	601.95	ACOT7	-1.61896	2.8283e-22	1.6228e-20
		ENSG00000183186	32.7308	23.7805	32.9332	19.0692	5.18786	5.22486	8.21002	9.72631	C2CD4C	-1.61625	3.23164e-05	0.000174095
		ENSG00000144852	24.796	19.3767	23.372	9.53462	11.4133	3.13492	0	2.1614	NR1I2	-1.61425	0.000271631	0.00118961
		ENSG00000170421	427080	345440	350283	222973	81944.3	87764.1	106180	101550	KRT8	-1.61285	9.60476e-07	6.92814e-06
		ENSG00000179846	110.094	118.903	104.112	78.3957	41.5028	42.8438	13.4346	27.0175	NKPD1	-1.6101	2.47765e-09	2.79928e-08
		ENSG00000268093	9.91841	12.3306	6.37418	4.23761	4.15028	0	0	1.0807		-1.61003	0.00129436	0.00486087
		ENSG00000013588	40471.1	35547.5	37572.6	27436.4	8663.72	9187.39	10295.4	16440.7	GPRC5A	-1.6095	3.6277e-16	1.0804e-14
		ENSG00000259925	41.6573	43.1572	47.8063	18.0098	4.15028	4.17989	11.9418	17.2912		-1.60702	4.77364e-05	0.000247631
		ENSG00000002079	58.5186	38.7534	50.9934	28.6039	3.11271	8.35978	23.1373	9.72631		-1.60089	5.3844e-05	0.000275529
		ENSG00000072274	37564	40699.9	39621.9	19658.3	12476.8	12009.9	9394.5	8911.46	TFRC	-1.59927	5.79702e-23	3.62938e-21
		ENSG00000252419	8.92657	12.3306	3.18709	2.1188	2.07514	0	0	1.0807		-1.5975	0.00171912	0.00626199
		ENSG00000114654	49.5921	39.6342	52.0558	37.0791	11.4133	2.08994	17.1664	17.2912	EFCC1	-1.59237	4.03595e-05	0.000212278
		ENSG00000166391	12.8939	16.7344	12.7484	21.188	6.22543	4.17989	0.746365	1.0807	MOGAT2	-1.59172	0.00149971	0.00554114
		ENSG00000185803	4891.76	3900.88	3789.45	2718.43	1267.91	1378.32	979.977	1263.34	SLC52A2	-1.58956	4.39144e-24	3.09092e-22
		ENSG00000261762	157.703	192.006	163.604	159.97	53.9537	48.0687	67.1729	46.4701		-1.58838	2.10617e-18	8.03608e-17
		ENSG00000135773	239.034	213.144	210.348	104.881	83.0057	63.7433	35.0792	46.4701	CAPN9	-1.58824	1.38242e-08	1.36757e-07
		ENSG00000162433	2304.05	2418.57	2246.9	1197.12	742.901	671.917	568.73	596.547	AK4	-1.58806	4.34485e-29	5.15559e-27
		ENSG00000166002	461.206	434.214	411.134	263.791	117.246	114.947	136.585	111.312	SMCO4	-1.58728	1.22836e-10	1.70376e-09
		ENSG00000151715	2893.2	2812.27	2687.78	2451.46	849.771	816.123	867.276	1050.44	TMEM45B	-1.5871	4.52842e-42	1.68249e-39
		ENSG00000120875	3379.2	2610.57	3024.55	2431.33	914.1	943.61	719.496	1182.29	DUSP4	-1.58692	4.06371e-24	2.88714e-22
		ENSG00000139567	9.91841	10.5691	14.8731	19.0692	0	1.04497	2.98546	6.4842	ACVRL1	-1.58459	0.0013683	0.00511061
		ENSG00000104951	112.078	70.4608	78.6148	25.4256	11.4133	14.6296	23.8837	28.0982	IL4I1	-1.58413	1.3503e-05	7.88541e-05
		ENSG00000143337	1959.88	2101.49	2086.48	1920.7	723.187	634.298	534.397	770.54	TOR1AIP1	-1.58244	4.26439e-36	1.00675e-33
		ENSG00000181450	530.635	530.217	591.736	509.572	170.162	193.32	164.947	178.316	ZNF678	-1.58114	2.13902e-27	2.17394e-25
		ENSG00000129437	27.7716	20.2575	23.372	24.3662	2.07514	10.4497	5.97092	6.4842	KLK14	-1.58086	5.82764e-05	0.000296138
		ENSG00000202402	17.8531	22.019	13.8107	2.1188	1.03757	4.17989	1.49273	1.0807		-1.58013	0.00204654	0.00730554
		ENSG00000263829	18.845	11.4499	22.3096	20.1286	3.11271	4.17989	5.97092	5.4035		-1.57898	3.7607e-05	0.000199276
		ENSG00000188257	6.94289	7.92684	9.56126	30.7227	2.07514	4.17989	2.2391	3.2421	PLA2G2A	-1.57598	0.00031907	0.00137636
		ENSG00000138152	350.12	344.377	344.205	296.633	113.095	94.0475	132.853	97.2631	BTBD16	-1.57525	9.21465e-29	1.06551e-26
		ENSG00000160145	2850.55	2895.94	3048.98	1495.88	885.048	759.695	788.908	809.445	KALRN	-1.57384	2.94204e-16	8.86682e-15
		ENSG00000272711	156.711	132.995	165.729	61.4453	41.5028	48.0687	37.3183	34.5824		-1.57369	2.93295e-14	6.77597e-13
		ENSG00000200115	8.92657	3.52304	6.37418	3.17821	0	1.04497	0.746365	0		-1.5735	0.00233682	0.00823923
		ENSG00000196715	5081.2	5211.45	4953.8	2680.29	1607.2	1485.95	1084.47	1534.59	VKORC1L1	-1.57286	4.57975e-19	1.84168e-17
		ENSG00000169252	95.2168	74.8646	79.6772	43.4355	29.052	19.8545	21.6446	20.5333	ADRB2	-1.57189	3.67401e-10	4.7365e-09
		ENSG00000260633	12.8939	23.7805	13.8107	11.6534	3.11271	4.17989	0.746365	7.5649		-1.57028	0.000279676	0.00122201
		ENSG00000187902	5.95105	6.16532	9.56126	8.47522	0	2.08994	0	2.1614	SHISA7	-1.57015	0.00236758	0.00833213
		ENSG00000250050	9.91841	10.5691	9.56126	9.53462	1.03757	5.22486	0	2.1614		-1.56979	0.00121391	0.00459991
		ENSG00000106785	1557.19	1499.93	1486.25	3030.95	500.109	555.925	689.641	627.887	TRIM14	-1.56861	7.67299e-17	2.48075e-15
		ENSG00000198758	4464.28	4266.4	4055.04	4915.63	1509.67	1511.03	1310.62	1603.76	EPS8L3	-1.56843	1.64534e-97	1.243e-93
		ENSG00000185052	10.9103	4.4038	11.686	6.35641	0	3.13492	0	2.1614	SLC24A3	-1.56831	0.00197658	0.00708733
		ENSG00000177181	490.961	470.326	539.68	404.692	190.913	179.735	127.628	129.684	RIMKLA	-1.5678	5.75297e-23	3.61178e-21
		ENSG00000002834	36385.7	33564.9	32597.5	40257.3	11012.8	11067.3	10738.7	15075.8	LASP1	-1.56681	1.21854e-42	4.8451e-40
		ENSG00000215644	33.7226	40.5149	36.1203	25.4256	8.30057	12.5397	11.1955	8.6456	GCGR	-1.5664	6.19634e-08	5.53543e-07
		ENSG00000248213	22.8124	20.2575	32.9332	11.6534	5.18786	2.08994	11.1955	2.1614		-1.56489	0.000464259	0.00193028
		ENSG00000162878	5268.66	4690.93	4728.58	3386.91	1664.26	1662.55	1048.64	1522.71	PKDCC	-1.56407	5.44057e-24	3.79401e-22
		ENSG00000135917	110.094	91.599	144.481	272.266	57.0664	40.7539	37.3183	47.5508	SLC19A3	-1.56404	1.20471e-08	1.20439e-07
		ENSG00000240787	7.93473	2.64228	5.31181	23.3068	2.07514	0	0.746365	4.3228		-1.56394	0.00092026	0.0035824
		ENSG00000082269	5843.93	5704.68	5855.74	2975.86	1619.65	1398.17	1629.31	1917.16	FAM135A	-1.56303	6.09503e-18	2.23524e-16
		ENSG00000224863	24.796	24.6613	25.4967	5.29701	6.22543	4.17989	4.47819	5.4035	LINC01398	-1.56239	0.000189655	0.000856325
		ENSG00000205213	13879.8	15083	14921.9	8576.92	4602.67	4336.63	3319.09	4772.37	LGR4	-1.56154	1.13249e-19	4.87035e-18
		ENSG00000138678	1833.91	1828.46	1823.01	556.186	443.043	407.539	378.407	592.224	GPAT3	-1.56123	4.69417e-08	4.27951e-07
		ENSG00000163710	226.14	196.409	203.974	100.643	52.9161	62.6983	59.7092	54.035	PCOLCE2	-1.55966	2.76821e-13	5.70871e-12
		ENSG00000258828	64.4697	52.8456	76.4901	36.0197	15.5636	13.5846	21.6446	18.3719		-1.55956	8.44954e-08	7.37675e-07
		ENSG00000188037	146.793	150.61	137.045	100.643	42.5404	40.7539	40.3037	48.6315	CLCN1	-1.55795	8.38561e-12	1.39343e-10
		ENSG00000226549	12.8939	11.4499	9.56126	87.9304	2.07514	4.17989	2.98546	23.7754		-1.557	1.96333e-05	0.000110992
		ENSG00000145685	2366.53	2176.36	2377.57	942.868	573.777	596.679	539.622	751.087	LHFPL2	-1.55653	1.20023e-10	1.66679e-09
		ENSG00000242515	6230.75	6124.8	6150.02	3678.24	1843.76	1831.84	1585.28	2005.78	UGT1A10	-1.55588	1.20962e-22	7.27186e-21
		ENSG00000147168	158.695	118.022	161.479	130.306	16.6011	17.7645	38.811	151.298	IL2RG	-1.5555	1.53889e-05	8.89505e-05
		ENSG00000184232	3318.7	2459.96	2775.95	1700.34	813.456	964.509	620.229	949.936	OAF	-1.55346	5.10077e-15	1.32878e-13
		ENSG00000227507	151.752	103.049	121.109	47.6731	22.8266	17.7645	31.3473	56.1964	LTB	-1.55288	2.07567e-05	0.000116674
		ENSG00000137266	1254.68	1171.41	1189.85	983.125	395.315	420.079	265.706	461.459	SLC22A23	-1.55131	1.31436e-20	6.28455e-19
		ENSG00000168615	20311.9	20093.6	20110.5	11077.1	5776.16	5292.78	5758.95	6608.48	ADAM9	-1.55104	5.83995e-22	3.22035e-20
		ENSG00000035664	158.695	134.756	155.105	121.831	40.4653	51.2036	36.5719	59.4385	DAPK2	-1.55034	2.75848e-13	5.69383e-12
		ENSG00000267655	12.8939	12.3306	12.7484	25.4256	7.263	4.17989	0	3.2421		-1.54877	0.000905879	0.00353067
		ENSG00000049540	99.1841	139.16	74.3654	69.9205	35.2774	33.4391	26.1228	24.8561	ELN	-1.54838	9.00207e-08	7.81098e-07
		ENSG00000204930	5.95105	2.64228	4.24945	5.29701	0	1.04497	0	0	FAM221B	-1.54778	0.0030212	0.0103495
		ENSG00000117525	580.227	617.412	610.858	453.424	186.763	159.881	160.468	251.803	F3	-1.54654	7.40098e-17	2.39623e-15
		ENSG00000162552	58.5186	47.561	58.4299	15.891	8.30057	10.4497	20.8982	10.807	WNT4	-1.54565	2.87013e-06	1.89095e-05
		ENSG00000244515	15.8695	19.3767	19.1225	15.891	4.15028	0	5.22456	8.6456		-1.54254	0.000385641	0.00163184
		ENSG00000128274	1072.18	744.242	857.327	1716.23	351.737	381.415	179.128	513.333	A4GALT	-1.54205	4.70021e-14	1.05996e-12
		ENSG00000100079	192.417	187.602	176.352	127.128	48.7658	39.7089	87.3247	37.8245	LGALS2	-1.53954	5.30792e-08	4.79469e-07
		ENSG00000254429	382.851	349.662	365.453	163.148	103.757	115.992	88.8174	98.3438		-1.53945	8.0073e-16	2.28273e-14
		ENSG00000110888	7118.45	6724.6	7748.87	2047.82	1770.1	1715.84	1836.06	1811.25	CAPRIN2	-1.5394	4.33816e-10	5.5205e-09
		ENSG00000135698	1281.46	1330.83	1412.94	1211.96	447.193	409.629	411.247	511.171	MPHOSPH6	-1.53912	1.59903e-35	3.58816e-33
		ENSG00000163347	710.158	630.624	645.916	467.196	151.485	154.656	199.279	330.694	CLDN1	-1.53903	6.51994e-14	1.43883e-12
		ENSG00000229145	17.8531	16.7344	16.9978	8.47522	2.07514	2.08994	4.47819	6.4842		-1.53801	0.00029372	0.00127551
		ENSG00000224037	3.96737	6.16532	10.6236	3.17821	1.03757	0	0	1.0807		-1.53703	0.00331669	0.0112327
		ENSG00000101203	26.7797	23.7805	31.8709	9.53462	5.18786	15.6746	1.49273	2.1614	COL20A1	-1.53655	0.00012974	0.000606274
		ENSG00000270728	71.4126	58.1301	57.3676	38.1385	21.789	17.7645	14.9273	17.2912		-1.53449	5.83181e-09	6.18784e-08
		ENSG00000183778	234.075	234.282	223.096	304.048	74.7051	89.8676	42.5428	126.442	B3GALT5	-1.53402	9.47086e-12	1.56221e-10
		ENSG00000133067	47.6084	30.8266	40.3698	18.0098	4.15028	4.17989	3.73183	24.8561	LGR6	-1.53356	0.000576815	0.00234906
		ENSG00000060749	4517.84	5054.68	4938.92	5893.45	1709.92	1582.09	1610.66	2105.2	QSER1	-1.53242	4.30792e-62	6.10216e-59
		ENSG00000245848	12.8939	11.4499	9.56126	45.5543	1.03757	4.17989	0.746365	16.2105	CEBPA	-1.53147	0.000133992	0.000624469
		ENSG00000146216	41.6573	33.4689	33.9956	37.0791	18.6763	6.26983	7.46365	11.8877	TTBK1	-1.53118	4.67594e-06	2.9685e-05
		ENSG00000130707	1151.53	1046.34	963.563	318.88	272.881	272.738	333.625	206.414	ASS1	-1.53044	7.37214e-12	1.23771e-10
		ENSG00000182866	214.238	206.098	201.849	50.8513	47.7283	50.1587	12.6882	75.649	LCK	-1.52899	0.000105806	0.000504838
		ENSG00000136826	4454.36	3759.96	3990.23	1489.52	849.771	844.337	1594.98	960.743	KLF4	-1.52836	1.13445e-08	1.1417e-07
		ENSG00000261655	17.8531	24.6613	24.4343	10.594	8.30057	6.26983	3.73183	3.2421		-1.52779	0.000191357	0.000863241
		ENSG00000117862	3299.86	3373.31	2957.62	3073.33	1113.31	1122.3	795.625	1313.05	TXNDC12	-1.52756	9.68843e-29	1.11461e-26
		ENSG00000135750	1884.5	1627.64	1755.02	1113.43	484.546	474.417	535.89	657.066	KCNK1	-1.52632	6.33778e-18	2.32051e-16
		ENSG00000162636	2857.49	3224.46	3047.92	1839.12	1035.5	1006.31	596.346	965.066	FAM102B	-1.52598	6.20867e-15	1.60266e-13
		ENSG00000225329	132.907	156.775	196.537	186.455	46.6907	43.8888	24.63	116.716	LHFPL3-AS2	-1.52502	5.98757e-09	6.33531e-08
		ENSG00000069482	53.5594	49.3225	53.1181	2.1188	9.33814	3.13492	14.9273	4.3228	GAL	-1.52467	0.00220991	0.0078283
		ENSG00000108788	3157.03	3198.04	3087.23	2751.27	1122.65	1225.75	737.409	1072.05	MLX	-1.52358	1.81601e-27	1.86236e-25
		ENSG00000142623	121.996	96.8835	124.296	290.276	35.2774	37.619	47.7674	85.3753	PADI1	-1.52355	1.26135e-19	5.40402e-18
		ENSG00000167244	1418.33	1471.75	1304.58	2713.13	565.476	483.822	281.38	1105.56	IGF2	-1.5232	1.78068e-18	6.81711e-17
		ENSG00000121742	24.796	14.9729	18.0602	5.29701	2.07514	6.26983	3.73183	2.1614	GJB6	-1.52246	0.0007158	0.00285514
		ENSG00000255650	55.5431	61.6532	52.0558	7.41581	5.18786	6.26983	17.9128	14.0491	FAM222A-AS1	-1.52144	0.000331291	0.00142501
		ENSG00000130287	7.93473	10.5691	6.37418	0	0	0	1.49273	1.0807	NCAN	-1.52142	0.00363065	0.0121741
		ENSG00000154217	3227.45	2993.7	3112.72	4243.96	1080.11	1128.57	891.16	1625.37	PITPNC1	-1.52132	8.8447e-45	4.45458e-42
		ENSG00000116703	9.91841	13.2114	16.9978	1.0594	1.03757	2.08994	0.746365	3.2421	PDC	-1.52011	0.00273691	0.00947159
		ENSG00000173267	8397.92	6958.88	7658.57	8844.95	2401.98	2586.31	3357.9	2460.76	SNCG	-1.51972	6.75142e-18	2.45609e-16
		ENSG00000182004	3075.7	3117.01	3020.3	1377.22	1083.22	1057.51	736.662	626.806	SNRPE	-1.51934	5.87966e-28	6.28569e-26
		ENSG00000100311	2023.36	1437.4	1525.55	584.79	402.578	383.505	488.869	483.073	PDGFB	-1.51717	1.79875e-10	2.42824e-09
		ENSG00000137492	6125.61	6503.53	6567.53	3467.42	2081.37	1956.19	1579.31	1918.24	THAP12	-1.51689	9.85694e-23	5.9732e-21
		ENSG00000172339	384.834	455.353	410.072	232.009	149.41	134.801	88.8174	121.038	ALG14	-1.51537	1.08069e-16	3.42557e-15
		ENSG00000205086	5.95105	8.8076	10.6236	19.0692	4.15028	3.13492	1.49273	0	C2orf91	-1.51444	0.0020884	0.00743506
		ENSG00000049323	230.107	199.052	239.032	143.019	65.367	81.5078	30.601	78.8911	LTBP1	-1.51241	1.88132e-06	1.28274e-05
		ENSG00000075275	1007.71	798.849	881.761	722.512	251.092	247.658	364.226	300.435	CELSR1	-1.5122	9.21773e-24	6.23614e-22
		ENSG00000269113	40.6655	29.9458	33.9956	12.7128	11.4133	8.35978	2.2391	10.807	TRABD2B	-1.5121	0.000125429	0.000588677
		ENSG00000221949	12.8939	13.2114	8.4989	16.9504	4.15028	3.13492	4.47819	1.0807	LINC01465	-1.51201	0.00072058	0.00287067
		ENSG00000127412	10.9103	16.7344	9.56126	15.891	5.18786	0	3.73183	3.2421	TRPV5	-1.51156	0.000991932	0.00382658
		ENSG00000115053	80326.3	87165.2	82336.3	61487.7	27409.5	25960.2	21808.8	31117.7	NCL	-1.50999	4.8769e-20	2.16725e-18
		ENSG00000113555	32.7308	21.1382	30.8085	16.9504	10.3757	5.22486	8.95638	5.4035	PCDH12	-1.50904	1.18774e-05	7.02663e-05
		ENSG00000235884	1825.98	1697.22	1864.45	514.869	299.858	321.851	462.746	582.498	LINC00941	-1.50659	4.97758e-05	0.000256857
		ENSG00000116288	4780.68	4966.6	4644.65	5547.03	1930.92	1924.84	1159.85	1846.92	PARK7	-1.50628	2.12609e-23	1.38465e-21
		ENSG00000138356	7.93473	9.68835	9.56126	7.41581	2.07514	3.13492	2.2391	0	AOX1	-1.50614	0.00153365	0.00564907
		ENSG00000261357	16.8613	7.92684	10.6236	6.35641	2.07514	5.22486	0	1.0807		-1.50427	0.0026962	0.00934353
		ENSG00000181378	31.7389	24.6613	40.3698	10.594	7.263	9.40475	5.22456	8.6456	CFAP65	-1.50327	5.26537e-05	0.00027011
		ENSG00000118515	2045.18	1756.23	2031.24	2161.18	634.994	642.658	558.281	928.322	SGK1	-1.50254	1.51167e-17	5.30348e-16
		ENSG00000234155	381.859	378.727	364.39	240.484	88.1936	80.4628	153.005	137.249	LOC101928820	-1.5015	2.4265e-11	3.72338e-10
		ENSG00000241635	2210.81	2285.57	2342.51	1575.33	724.225	785.819	593.36	798.638	UGT1A1	-1.50127	8.03645e-26	7.00531e-24
		ENSG00000272088	40.6655	43.1572	39.3074	19.0692	10.3757	9.40475	9.70275	12.9684		-1.50034	3.63732e-05	0.000193059
		ENSG00000165959	2652.18	2469.65	2588.98	3146.42	886.086	904.946	850.11	1201.74	CLMN	-1.49887	5.14204e-98	5.82696e-94
		ENSG00000225028	6.94289	7.04608	9.56126	1.0594	1.03757	1.04497	0	1.0807		-1.49851	0.00382778	0.0127446
		ENSG00000165879	224.156	220.19	210.348	251.078	89.2311	86.7327	50.0065	88.6174	FRAT1	-1.49816	5.35003e-18	1.97803e-16
		ENSG00000188396	97.2005	94.2413	130.671	77.3363	26.9769	38.664	38.811	29.1789	TCTEX1D4	-1.4981	3.38751e-12	5.98398e-11
		ENSG00000148175	26.7797	15.8537	15.9354	20.1286	1.03757	1.04497	2.2391	18.3719	STOM	-1.49744	0.00286819	0.00987613
		ENSG00000085117	3772.96	3547.7	3421.87	4389.1	1092.56	1049.15	1730.82	1350.88	CD82	-1.49705	6.4385e-24	4.42188e-22
		ENSG00000094755	8005.15	8003.46	8038.9	4951.64	2617.79	2595.71	1853.22	2860.61	GABRP	-1.49625	4.11163e-17	1.37849e-15
		ENSG00000242779	1180.29	1196.07	1191.97	864.472	390.127	347.976	391.842	405.263	ZNF702P	-1.49554	1.18471e-32	2.09768e-30
		ENSG00000135074	2489.52	2102.37	2413.69	1934.47	740.826	774.324	697.105	903.466	ADAM19	-1.4952	1.03901e-21	5.59335e-20
		ENSG00000118777	2374.47	2829	2502.93	2859.33	922.401	937.34	747.858	1076.38	ABCG2	-1.49434	2.81568e-25	2.30378e-23
		ENSG00000230438	21.8205	11.4499	8.4989	11.6534	5.18786	1.04497	0	6.4842		-1.49411	0.00199007	0.00712866
		ENSG00000220378	17.8531	10.5691	18.0602	37.0791	1.03757	0	5.97092	18.3719		-1.494	0.000539899	0.00221271
		ENSG00000256269	3038.01	3137.27	2881.13	1704.58	1068.7	1000.04	764.278	825.655	HMBS	-1.49336	2.3918e-25	2.00029e-23
		ENSG00000146477	606.015	579.54	586.424	336.89	154.598	128.532	181.367	250.723	SLC22A3	-1.49325	1.45085e-10	1.98563e-09
		ENSG00000130164	10877.5	9741.2	9828.98	5761.03	2419.62	2375.22	3247.43	4292.54	LDLR	-1.49243	4.74426e-13	9.39073e-12
		ENSG00000102934	41.6573	34.3496	46.744	18.0098	11.4133	12.5397	7.46365	12.9684	PLLP	-1.49215	2.20713e-07	1.78907e-06
		ENSG00000147471	1254.68	1293.84	1217.47	1139.92	475.208	426.349	315.712	510.091	PROSC	-1.49172	1.3781e-28	1.5462e-26
		ENSG00000137193	3776.93	3302.85	3669.4	959.818	899.574	828.663	1000.88	980.195	PIM1	-1.4911	4.2321e-08	3.88955e-07
		ENSG00000159164	57.5268	74.8646	58.4299	28.6039	17.6387	16.7196	10.4491	24.8561	SV2A	-1.48818	1.01761e-05	6.08528e-05
		ENSG00000172818	1727.79	1533.4	1593.54	1028.68	501.147	563.24	464.985	509.01	OVOL1	-1.48611	3.22433e-24	2.30524e-22
		ENSG00000139946	517.741	491.464	509.934	312.524	159.786	158.836	115.687	194.526	PELI2	-1.48383	2.23835e-11	3.44867e-10
		ENSG00000129673	12.8939	7.92684	7.43654	4.23761	1.03757	0	2.98546	2.1614	AANAT	-1.48374	0.001516	0.00558949
		ENSG00000189280	10.9103	4.4038	5.31181	7.41581	1.03757	1.04497	0	3.2421	GJB5	-1.48316	0.00326499	0.0110742
		ENSG00000174791	824.22	702.846	734.093	601.74	210.627	234.074	326.908	220.463	RIN1	-1.48297	6.84333e-19	2.71149e-17
		ENSG00000164690	4640.83	4254.95	4153.84	3946.27	1715.11	1662.55	641.874	1809.09	SHH	-1.48273	1.13078e-10	1.57614e-09
		ENSG00000135480	216.221	168.225	183.789	118.653	33.2023	48.0687	95.5347	47.5508	KRT7	-1.4823	4.55472e-08	4.1641e-07
		ENSG00000184900	5571.17	5178.87	5158.83	3674.01	1605.12	1678.22	1539	2042.52	SUMO3	-1.48165	1.90536e-23	1.25168e-21
		ENSG00000214814	35.7063	43.1572	44.6192	28.6039	5.18786	16.7196	2.2391	18.3719	FER1L6	-1.48163	0.00052446	0.00215567
		ENSG00000259087	82.3228	96.8835	104.112	31.7821	17.6387	19.8545	32.0937	28.0982		-1.48157	4.41693e-07	3.40726e-06
		ENSG00000159399	4856.06	5275.75	5020.73	4650.77	1990.06	2043.97	1156.87	1733.44	HK2	-1.48031	3.81451e-21	1.9169e-19
		ENSG00000196091	6.94289	5.28456	8.4989	4.23761	1.03757	1.04497	0	1.0807	MYBPC1	-1.47898	0.00440651	0.0144091
		ENSG00000170477	16.8613	8.8076	10.6236	0	1.03757	2.08994	2.2391	1.0807	KRT4	-1.47841	0.00327013	0.0110883
		ENSG00000225969	102.16	66.057	93.4879	49.7919	20.7514	34.4841	20.8982	27.0175	ABHD11-AS1	-1.47808	1.90561e-08	1.8441e-07
		ENSG00000223979	13.8858	7.92684	13.8107	0	2.07514	1.04497	2.2391	0	SMCR2	-1.47803	0.00390245	0.0129545
		ENSG00000259790	25.7879	24.6613	26.5591	49.7919	9.33814	6.26983	4.47819	22.6947		-1.4776	2.00946e-06	1.36354e-05
		ENSG00000144136	7209.69	6743.1	6969.1	3926.14	2211.06	2191.31	2174.16	2023.07	SLC20A1	-1.47718	3.76509e-34	7.48526e-32
		ENSG00000165105	6406.3	6212	6706.69	5651.91	1944.41	1989.63	2414.49	2482.37	RASEF	-1.47564	4.80857e-26	4.25709e-24
		ENSG00000158055	396.737	347.019	343.143	684.374	151.485	119.127	148.527	188.042	GRHL3	-1.47354	2.38162e-22	1.39116e-20
		ENSG00000186832	14.8776	14.0922	15.9354	1.0594	2.07514	2.08994	3.73183	2.1614	KRT16	-1.47175	0.00261055	0.00907584
		ENSG00000065618	5107.98	4375.61	4618.09	3786.3	1483.73	1408.62	1789.04	1681.57	COL17A1	-1.46864	3.1211e-39	8.95399e-37
		ENSG00000100568	759.75	771.545	738.342	886.719	260.43	292.592	186.591	396.617	VTI1B	-1.46708	4.01427e-19	1.62754e-17
		ENSG00000105855	3015.2	3225.34	3381.5	652.592	652.632	635.343	798.611	849.431	ITGB8	-1.46597	3.5987e-05	0.000191225
		ENSG00000260196	224.156	203.455	231.595	162.088	32.1647	38.664	120.911	69.1648		-1.46523	3.45943e-06	2.25042e-05
		ENSG00000159921	1372.71	1392.48	1403.38	2552.1	654.707	552.79	416.472	700.294	GNE	-1.46497	6.5843e-22	3.61897e-20
		ENSG00000186648	80.3391	59.8916	76.4901	29.6633	24.9017	25.0793	9.70275	19.4526	CARMIL3	-1.46485	1.39145e-06	9.72706e-06
		ENSG00000146521	36.6981	30.8266	35.058	50.8513	8.30057	8.35978	17.1664	14.0491	LINC01558	-1.46477	1.27881e-05	7.50078e-05
		ENSG00000170899	805.375	782.114	774.462	312.524	243.829	213.174	143.302	286.386	GSTA4	-1.46153	2.62754e-09	2.95536e-08
		ENSG00000068615	8.92657	13.2114	14.8731	6.35641	0	5.22486	2.98546	0	REEP1	-1.4611	0.00402893	0.0133127
		ENSG00000255186	1.98368	7.04608	10.6236	3.17821	1.03757	0	1.49273	0		-1.46106	0.00525102	0.0168068
		ENSG00000013503	1133.67	1248.92	1127.17	770.185	404.653	376.19	300.039	424.715	POLR3B	-1.46012	1.69589e-20	7.97421e-19
		ENSG00000188211	1320.14	1241.87	1438.44	1071.06	282.219	250.793	662.772	516.575	NCR3LG1	-1.45938	6.4143e-08	5.70988e-07
		ENSG00000204434	55.5431	38.7534	67.9912	59.3265	15.5636	12.5397	9.70275	39.9859		-1.45878	2.26599e-06	1.5271e-05
		ENSG00000099256	1643.48	1819.65	1715.72	716.156	581.04	475.462	508.275	423.635	PRTFDC1	-1.45753	6.81685e-18	2.47195e-16
		ENSG00000203645	19.8368	26.4228	35.058	10.594	7.263	5.22486	2.2391	8.6456	LINC00501	-1.45672	0.00117716	0.00448087
		ENSG00000158352	890.674	880.76	948.69	1082.71	262.506	344.841	289.59	464.701	SHROOM4	-1.45644	3.19292e-17	1.0833e-15
		ENSG00000143195	27.7716	30.8266	40.3698	9.53462	3.11271	3.13492	14.9273	7.5649	ILDR2	-1.45554	0.000878432	0.00343433
		ENSG00000233381	3.96737	3.52304	1.06236	13.7722	0	0	0.746365	1.0807		-1.45527	0.0045817	0.0149259
		ENSG00000256229	18.845	17.6152	25.4967	20.1286	5.18786	3.13492	3.73183	14.0491	ZNF486	-1.4548	0.000188236	0.000850684
		ENSG00000103044	314.414	261.586	328.27	138.782	92.3438	79.4179	69.4119	115.635	HAS3	-1.45455	2.35354e-09	2.67506e-08
		ENSG00000228838	2.97552	4.4038	7.43654	9.53462	0	1.04497	0.746365	2.1614		-1.45449	0.00462	0.0150226
		ENSG00000157224	2803.94	2966.4	2892.81	3044.72	1152.74	1128.57	783.683	1080.7	CLDN12	-1.45412	2.77047e-16	8.372e-15
		ENSG00000025423	17.8531	15.8537	14.8731	7.41581	3.11271	4.17989	3.73183	4.3228	HSD17B6	-1.45379	0.000696731	0.00278545
		ENSG00000233217	27.7716	14.9729	20.1849	6.35641	6.22543	3.13492	4.47819	5.4035		-1.45274	0.000127035	0.000595108
		ENSG00000268157	29.7552	22.019	24.4343	15.891	8.30057	5.22486	3.73183	10.807		-1.45272	0.00016414	0.00074956
		ENSG00000204542	10.9103	11.4499	11.686	7.41581	0	0	1.49273	4.3228	C6orf15	-1.4505	0.00562832	0.0178806
		ENSG00000153294	403.679	293.293	359.079	146.197	88.1936	70.0131	185.099	56.1964	ADGRF4	-1.45043	1.26704e-07	1.06435e-06
		ENSG00000065717	66.4534	68.6992	64.8041	13.7722	10.3757	19.8545	21.6446	11.8877	TLE2	-1.44999	5.70379e-05	0.000290365
		ENSG00000104331	4941.35	5229.95	5198.14	4821.34	2084.48	1960.37	1328.53	1897.71	IMPAD1	-1.44922	7.14628e-28	7.53317e-26
		ENSG00000203688	104.143	83.6722	81.8019	119.712	37.3526	36.574	35.8255	25.9368	LOC441178	-1.44791	7.48655e-10	9.1766e-09
		ENSG00000115616	10.9103	14.0922	24.4343	43.4355	7.263	7.3148	6.71729	4.3228	SLC9A2	-1.44651	0.000254925	0.00112165
		ENSG00000270558	26.7797	19.3767	13.8107	11.6534	5.18786	3.13492	4.47819	7.5649		-1.44578	0.000878795	0.00343456
		ENSG00000142661	2056.09	2062.74	2030.17	1597.58	830.057	799.404	581.418	596.547	MYOM3	-1.44338	1.99583e-31	3.09819e-29
		ENSG00000236896	11.9021	7.92684	3.18709	10.594	0	4.17989	0.746365	1.0807		-1.44225	0.00491792	0.0158707
		ENSG00000131969	12.8939	25.542	30.8085	7.41581	4.15028	3.13492	5.97092	6.4842	ABHD12B	-1.44218	0.00157135	0.00577198
		ENSG00000261229	5.95105	7.92684	6.37418	1.0594	1.03757	0	0.746365	1.0807		-1.43945	0.00586886	0.0185227
		ENSG00000125844	12822.5	12467.2	12134.3	16063.7	4807.07	5026.32	3339.98	6499.33	RRBP1	-1.4359	4.20163e-32	7.05376e-30
		ENSG00000237476	128.939	102.168	112.61	117.594	29.052	44.9338	47.021	42.1473	LOC101928891	-1.43551	3.50997e-14	8.05162e-13
		ENSG00000260105	42.6492	51.0841	45.6816	48.7325	21.789	19.8545	6.71729	8.6456	AOC4P	-1.43528	0.000311572	0.00134644
		ENSG00000185250	49.5921	59.0109	49.931	43.4355	18.6763	13.5846	13.4346	24.8561	PPIL6	-1.43487	5.32445e-09	5.7002e-08
		ENSG00000168389	688.338	539.906	565.177	269.088	170.162	191.23	170.918	171.831	MFSD2A	-1.43313	7.83906e-11	1.11739e-09
		ENSG00000186642	14.8776	15.8537	19.1225	18.0098	2.07514	8.35978	5.22456	4.3228	PDE2A	-1.43299	0.00025145	0.00110743
		ENSG00000131238	7855.38	7739.23	8018.71	5028.98	2924.91	2690.8	1321.81	3100.53	PPT1	-1.43285	6.23568e-11	9.00736e-10
		ENSG00000160870	45.6247	40.5149	36.1203	13.7722	11.4133	11.4947	11.1955	9.72631	CYP3A7	-1.43265	9.69736e-06	5.82355e-05
		ENSG00000087245	13.8858	10.5691	4.24945	12.7128	1.03757	1.04497	0	8.6456	MMP2	-1.43195	0.00499378	0.0160857
		ENSG00000266972	47.6084	49.3225	58.4299	24.3662	13.4884	21.9444	5.22456	16.2105		-1.43072	8.3832e-05	0.000410272
		ENSG00000213771	105.135	79.2684	105.174	315.702	26.9769	25.0793	32.0937	163.186		-1.42912	1.27859e-11	2.05664e-10
		ENSG00000256304	50.5839	43.1572	36.1203	28.6039	14.526	9.40475	23.1373	4.3228		-1.42838	3.25338e-05	0.0001751
		ENSG00000176542	2586.72	2937.33	2865.19	3093.45	931.739	979.139	834.436	1576.74	USF3	-1.42825	1.16186e-29	1.41572e-27
		ENSG00000088002	796.449	599.797	652.291	1075.29	183.65	214.219	397.066	298.273	SULT2B1	-1.42727	7.62024e-11	1.08756e-09
		ENSG00000167914	2.97552	0.88076	8.4989	7.41581	0	1.04497	0	0	GSDMA	-1.427	0.00502723	0.0161728
		ENSG00000236296	18.845	12.3306	20.1849	11.6534	4.15028	0	7.46365	5.4035	GUSBP5	-1.42683	0.00154632	0.00569387
		ENSG00000099957	38.6818	29.9458	33.9956	18.0098	13.4884	15.6746	4.47819	6.4842	P2RX6	-1.42654	1.96519e-05	0.000111059
		ENSG00000167656	11.9021	2.64228	14.8731	4.23761	0	2.08994	2.2391	2.1614	LY6D	-1.42477	0.00581613	0.0183903
		ENSG00000227947	46.6165	31.7073	31.8709	20.1286	13.4884	11.4947	3.73183	8.6456		-1.42377	0.000764983	0.00302734
		ENSG00000164077	520.717	495.868	520.558	430.117	154.598	164.061	191.069	203.172	MON1A	-1.42366	1.31396e-16	4.14757e-15
		ENSG00000049656	8830.36	7434.49	7913.54	4719.64	2492.25	2592.58	2741.4	2538.57	CLPTM1L	-1.42211	3.68778e-21	1.85733e-19
		ENSG00000171992	117.037	66.057	92.4255	43.4355	7.263	7.3148	53.7383	23.7754	SYNPO	-1.42146	0.000366085	0.00155782
		ENSG00000108242	42.6492	69.58	63.7418	31.7821	15.5636	12.5397	21.6446	18.3719	CYP2C18	-1.42136	2.16324e-06	1.4622e-05
		ENSG00000181444	139.85	113.618	100.924	217.177	46.6907	48.0687	39.5573	71.3262	ZNF467	-1.41876	6.06878e-15	1.56833e-13
		ENSG00000148204	40.6655	34.3496	31.8709	25.4256	14.526	14.6296	9.70275	5.4035	CRB2	-1.418	1.42815e-05	8.30577e-05
		ENSG00000184058	41.6573	23.7805	40.3698	49.7919	11.4133	11.4947	17.9128	9.72631	TBX1	-1.41723	1.37319e-05	8.00666e-05
		ENSG00000134193	2375.46	3662.2	2761.08	475.671	775.066	702.221	102.252	331.775	REG4	-1.41689	0.00497755	0.0160403
		ENSG00000184428	2251.48	2094.45	2079.04	3202.57	849.771	843.292	524.695	1402.75	TOP1MT	-1.41556	5.49291e-21	2.6888e-19
		ENSG00000180549	10.9103	25.542	16.9978	41.3167	8.30057	5.22486	1.49273	10.807	FUT7	-1.41527	0.0014009	0.00521862
		ENSG00000079435	1377.67	1089.5	1102.73	1225.73	464.832	560.105	295.561	434.442	LIPE	-1.4147	1.55364e-17	5.4423e-16
		ENSG00000125998	22.8124	36.9919	38.2451	20.1286	12.4509	15.6746	1.49273	7.5649	FAM83C	-1.41404	0.000183074	0.000828678
		ENSG00000184831	206.303	241.328	234.782	103.821	95.4566	71.0581	51.4992	59.4385	APOO	-1.41216	1.39388e-11	2.23099e-10
		ENSG00000198780	282.675	288.889	275.152	47.6731	64.3294	66.8782	90.3102	58.3578	FAM169A	-1.4117	5.51759e-06	3.45539e-05
		ENSG00000131981	4561.48	4188.01	4327	2774.57	1101.9	1106.63	2170.43	1291.44	LGALS3	-1.41163	8.83995e-14	1.92273e-12
		ENSG00000075223	7175.97	7052.24	7382.36	4123.19	1973.46	1834.97	2883.21	2505.06	SEMA3C	-1.41081	2.67273e-14	6.27067e-13
		ENSG00000160326	416.573	319.716	317.646	313.583	80.9306	106.587	148.527	161.024	SLC2A6	-1.41032	7.27963e-12	1.22393e-10
		ENSG00000259162	40.6655	34.3496	47.8063	8.47522	7.263	14.6296	12.6882	6.4842		-1.40982	3.26218e-05	0.000175532
		ENSG00000165801	2201.89	2103.25	2006.8	2299.96	864.297	894.496	653.069	795.396	ARHGEF40	-1.40976	6.22397e-37	1.60296e-34
		ENSG00000175567	5191.3	4584.35	4293.01	3556.41	1503.44	1498.49	1411.38	1871.77	UCP2	-1.40744	3.26153e-11	4.91484e-10
		ENSG00000041353	1360.81	1325.54	1435.25	804.086	457.569	454.563	388.11	472.266	RAB27B	-1.40724	1.03223e-16	3.29035e-15
		ENSG00000188549	3921.74	2662.54	3432.49	2038.29	1094.64	1096.18	1030.73	1141.22	C15orf52	-1.40717	2.45698e-20	1.12722e-18
		ENSG00000159753	343.177	239.567	263.466	116.534	76.7803	100.317	70.9047	87.5367	CARMIL2	-1.4069	7.28411e-08	6.44619e-07
		ENSG00000145041	2542.09	2671.34	2634.66	2346.58	967.016	992.723	834.436	1008.29	DCAF1	-1.40653	2.60798e-36	6.4247e-34
		ENSG00000184828	994.817	752.169	884.948	746.878	282.219	297.817	330.64	344.743	ZBTB7C	-1.40412	9.30774e-22	5.03462e-20
		ENSG00000110057	2881.3	2137.6	2092.85	2189.78	802.043	843.292	868.023	940.209	UNC93B1	-1.40347	1.03146e-24	7.76646e-23
		ENSG00000226812	17.8531	30.8266	39.3074	20.1286	2.07514	5.22486	11.9418	12.9684		-1.4031	0.000479225	0.00198522
		ENSG00000250899	1149.54	1042.82	1028.37	860.234	359	345.886	400.798	410.666		-1.40259	1.66122e-32	2.89614e-30
		ENSG00000253919	17.8531	17.6152	19.1225	34.9603	4.15028	6.26983	2.98546	18.3719		-1.40182	9.46676e-05	0.00045718
		ENSG00000265820	4.95921	3.52304	4.24945	2.1188	0	0	0	0	MIR3177	-1.40154	0.00729862	0.0224964
		ENSG00000110422	4986.98	5296.01	5166.27	3866.82	1722.37	1627.02	1721.12	2104.12	HIPK3	-1.40129	8.59577e-27	8.08359e-25
		ENSG00000165916	7390.21	7286.52	7044.53	4341.43	2569.03	2436.87	2212.23	2318.1	PSMC3	-1.40117	5.98938e-23	3.73948e-21
		ENSG00000019186	244.985	206.098	246.468	502.157	74.7051	73.148	137.331	129.684	CYP24A1	-1.40058	3.36639e-10	4.35479e-09
		ENSG00000144820	7.93473	12.3306	5.31181	19.0692	2.07514	2.08994	2.98546	2.1614	ADGRG7	-1.399	0.00365549	0.0122484
		ENSG00000248705	15.8695	36.9919	33.9956	8.47522	7.263	4.17989	14.1809	2.1614		-1.39879	0.0006229	0.00251602
		ENSG00000186193	3580.55	3183.95	2971.43	4819.22	1326.02	1391.9	1135.22	1518.38	SAPCD2	-1.39813	5.57878e-24	3.87845e-22
		ENSG00000077348	2473.65	2263.55	2158.72	2128.34	899.574	988.543	813.538	708.94	EXOSC5	-1.39805	2.31213e-36	5.75847e-34
		ENSG00000169035	54.5513	25.542	49.931	22.2474	9.33814	12.5397	10.4491	18.3719	KLK7	-1.39705	0.000120385	0.000567189
		ENSG00000099797	4194.5	3672.77	3502.61	3795.84	1295.93	1451.47	1256.88	1719.39	TECR	-1.39692	8.86331e-39	2.47998e-36
		ENSG00000155158	396.737	428.049	426.007	414.226	119.321	90.9126	247.793	122.119	TTC39B	-1.39609	1.36737e-06	9.57667e-06
		ENSG00000164086	1262.61	992.616	1101.67	644.116	343.436	347.976	318.698	448.491	DUSP7	-1.3931	2.74725e-11	4.17596e-10
		ENSG00000133816	9909.49	9502.51	9528.33	15344.4	3319.19	3377.35	3776.61	5720.15	MICAL2	-1.39306	4.12911e-11	6.14459e-10
		ENSG00000145287	407.647	340.854	411.134	311.464	81.9681	65.8332	195.548	179.396	PLAC8	-1.39123	5.10664e-07	3.89162e-06
		ENSG00000146700	67.4452	49.3225	67.9912	25.4256	17.6387	13.5846	25.3764	14.0491	SSC4D	-1.39077	1.98693e-06	1.34988e-05
		ENSG00000143164	2104.69	2565.65	2334.01	3882.71	1056.25	987.498	653.816	1331.42	DCAF6	-1.3906	3.08153e-19	1.26982e-17
		ENSG00000172460	141.833	129.472	125.359	133.485	46.6907	65.8332	46.2746	35.6631	PRSS30P	-1.39035	8.35327e-10	1.01457e-08
		ENSG00000123983	12843.4	13650.9	13198.8	15085.9	4893.19	4512.19	4458.04	7172.61	ACSL3	-1.39032	3.05428e-37	8.0491e-35
		ENSG00000080371	1503.63	1558.94	1491.56	2314.79	644.332	619.668	538.129	778.104	RAB21	-1.38913	2.2664e-45	1.19455e-42
		ENSG00000247271	340.202	322.358	313.397	204.465	108.945	105.542	147.78	74.5683	ZBED5-AS1	-1.38851	6.6806e-16	1.93866e-14
		ENSG00000006128	3.96737	6.16532	3.18709	16.9504	1.03757	2.08994	0.746365	2.1614	TAC1	-1.38849	0.00474179	0.0153701
		ENSG00000109265	1418.33	1469.11	1384.26	937.571	526.049	560.105	178.381	612.757	KIAA1211	-1.38836	2.82107e-07	2.24734e-06
		ENSG00000186603	1305.26	1133.54	1152.66	922.739	450.306	479.642	396.32	372.842	HPDL	-1.38816	4.97331e-31	7.22532e-29
		ENSG00000141232	6117.68	5549.67	6274.31	4322.36	1951.67	1793.17	1510.64	3078.92	TOB1	-1.38809	9.73859e-09	9.91089e-08
		ENSG00000248265	65.4615	69.58	65.8665	22.2474	18.6763	25.0793	20.1519	14.0491	FLJ12825	-1.38809	2.43337e-08	2.32015e-07
		ENSG00000170775	519.725	495.868	417.508	273.326	101.682	134.801	209.729	166.428	GPR37	-1.38794	4.02657e-11	6.00778e-10
		ENSG00000100994	50084	45086.1	44375.9	37764.5	17685.4	18588	13306.9	17131.3	PYGB	-1.38784	6.81056e-30	8.62316e-28
		ENSG00000079308	1284.43	1244.51	1261.02	1360.27	600.754	593.544	335.864	400.94	TNS1	-1.38647	5.3204e-17	1.76031e-15
		ENSG00000198053	124.972	100.407	120.047	33.9009	23.8641	19.8545	38.0646	43.228	SIRPA	-1.38625	6.61632e-05	0.000330656
		ENSG00000253958	20.8287	16.7344	12.7484	22.2474	7.263	5.22486	4.47819	6.4842	CLDN23	-1.38375	0.000343943	0.00147439
		ENSG00000132507	12045.9	11154.8	10557.8	13121.8	4306.96	4622.96	3060.1	5840.11	EIF5A	-1.3834	1.59964e-22	9.44122e-21
		ENSG00000136636	4150.86	4198.58	4303.63	2779.87	1372.71	1251.88	1706.19	1388.7	KCTD3	-1.38337	1.08656e-23	7.24291e-22
		ENSG00000172292	6146.44	6218.16	6280.69	4678.32	2334.54	2344.92	1761.42	2329.99	CERS6	-1.38184	4.649e-24	3.26208e-22
		ENSG00000116396	214.238	162.941	145.544	117.594	47.7283	33.4391	70.9047	79.9718	KCNC4	-1.38134	7.45572e-08	6.57496e-07
		ENSG00000163915	10.9103	13.2114	20.1849	4.23761	1.03757	3.13492	4.47819	3.2421	IGF2BP2-AS1	-1.38121	0.00357033	0.0119966
		ENSG00000269155	72.4044	65.1762	63.7418	36.0197	10.3757	21.9444	43.2892	6.4842		-1.38094	2.63997e-05	0.000144732
		ENSG00000143107	7.93473	9.68835	7.43654	5.29701	1.03757	4.17989	0	1.0807	FNDC7	-1.38091	0.00598368	0.0188353
		ENSG00000145990	1275.51	1207.52	1297.14	1138.86	355.887	374.1	526.187	573.852	GFOD1	-1.38078	3.12275e-12	5.5509e-11
		ENSG00000264091	3.96737	7.92684	9.56126	1.0594	0	2.08994	1.49273	0		-1.37979	0.00802235	0.0243986
		ENSG00000133466	916.461	743.361	745.778	658.948	274.956	284.232	265.706	322.049	C1QTNF6	-1.37908	2.77345e-19	1.15335e-17
		ENSG00000183844	5.95105	9.68835	5.31181	7.41581	1.03757	1.04497	3.73183	0	FAM3B	-1.37903	0.00584185	0.0184478
		ENSG00000176761	15.8695	9.68835	9.56126	5.29701	2.07514	1.04497	3.73183	3.2421		-1.37825	0.00305889	0.0104613
		ENSG00000013288	3781.89	3191.87	3318.82	3279.91	1250.27	1418.03	1033.72	1478.4	MAN2B2	-1.37804	7.41794e-27	7.03431e-25
		ENSG00000100304	4841.18	4350.07	4125.15	5312.9	1456.75	1704.35	1550.2	2438.06	TTLL12	-1.37793	7.59907e-29	8.83207e-27
		ENSG00000090382	43428.8	47238.7	44191.1	39931	18408.6	17467.8	11541	18682.1	LYZ	-1.37679	3.64892e-22	2.05209e-20
		ENSG00000254604	8.92657	16.7344	13.8107	5.29701	4.15028	4.17989	1.49273	2.1614		-1.37648	0.00349168	0.011749
		ENSG00000091844	324.332	387.534	415.384	205.524	97.5317	80.4628	153.005	151.298	RGS17	-1.3764	2.20979e-09	2.52687e-08
		ENSG00000133056	2669.05	2553.32	2508.24	4216.42	1226.41	1275.91	620.976	1260.1	PIK3C2B	-1.37521	2.11898e-13	4.42623e-12
		ENSG00000261773	11.9021	20.2575	13.8107	18.0098	5.18786	5.22486	2.2391	7.5649		-1.37466	0.000831144	0.0032641
		ENSG00000166734	2418.11	2531.3	2537.98	3921.91	1107.09	996.903	783.683	1445.98	CASC4	-1.37449	7.57977e-31	1.07261e-28
		ENSG00000196533	2.97552	3.52304	4.24945	16.9504	2.07514	0	0.746365	2.1614		-1.37374	0.00503903	0.0162061
		ENSG00000227954	15.8695	17.6152	31.8709	30.7227	6.22543	11.4947	5.22456	7.5649	TARID	-1.37343	0.000209626	0.000938546
		ENSG00000213538	15.8695	11.4499	15.9354	42.3761	3.11271	6.26983	1.49273	19.4526	KRT8P41	-1.37309	0.000242967	0.00107299
		ENSG00000262884	6.94289	1.76152	8.4989	4.23761	1.03757	0	1.49273	0	LOC101927911	-1.37217	0.00874456	0.0263301
		ENSG00000262484	30.7471	22.8997	28.6838	9.53462	4.15028	13.5846	3.73183	6.4842	CCER2	-1.37138	0.000482538	0.00199858
		ENSG00000180776	2405.22	2622.9	2433.87	1613.47	1045.87	960.329	585.15	789.992	ZDHHC20	-1.36885	3.48899e-15	9.28104e-14
		ENSG00000205436	87.282	57.2494	79.6772	54.0295	20.7514	21.9444	29.8546	27.0175	EXOC3L4	-1.36708	4.38033e-08	4.01764e-07
		ENSG00000270101	135.882	120.664	145.544	60.3859	64.3294	47.0237	55.231	11.8877		-1.36693	7.85469e-09	8.12129e-08
		ENSG00000224854	9.91841	7.04608	19.1225	4.23761	3.11271	2.08994	2.98546	2.1614		-1.3665	0.00458396	0.0149311
		ENSG00000103121	933.323	1141.46	1077.24	548.77	423.329	329.166	313.473	303.677	CMC2	-1.36586	1.27279e-18	4.94794e-17
		ENSG00000111358	2602.59	2609.69	2616.6	1432.31	930.701	956.149	888.921	712.182	GTF2H3	-1.36521	6.64784e-32	1.09976e-29
		ENSG00000137486	2705.74	2809.62	2659.09	1966.25	1072.85	1098.27	730.691	949.936	ARRB1	-1.36505	8.36333e-21	4.05014e-19
		ENSG00000015475	2683.92	2197.5	2206.53	1018.09	761.577	769.099	635.903	774.862	BID	-1.36494	2.52114e-12	4.53125e-11
		ENSG00000106628	6245.62	5635.98	5352.18	7167.91	2335.57	2587.35	1493.48	2915.73	POLD2	-1.36426	4.82774e-20	2.14963e-18
		ENSG00000164713	2317.93	1960.57	2043.99	2380.48	876.748	917.485	597.092	942.371	BRI3	-1.36412	3.16007e-24	2.26645e-22
		ENSG00000172738	50.5839	47.561	35.058	18.0098	4.15028	10.4497	14.1809	19.4526	TMEM217	-1.36284	0.000384396	0.00162772
		ENSG00000251609	5.95105	7.04608	5.31181	10.594	3.11271	0	0.746365	1.0807		-1.36232	0.00889465	0.0267217
		ENSG00000205277	157.703	174.39	190.163	114.415	62.2543	65.8332	67.9192	44.3087	MUC12	-1.36178	6.48545e-16	1.89171e-14
		ENSG00000159640	10.9103	0	8.4989	3.17821	0	0	0.746365	1.0807	ACE	-1.36094	0.00811709	0.024657
		ENSG00000101079	2286.19	2479.34	2329.76	2624.14	1057.29	1008.4	697.851	948.855	NDRG3	-1.36092	8.57079e-20	3.70703e-18
		ENSG00000144230	3.96737	4.4038	6.37418	9.53462	1.03757	1.04497	1.49273	0	GPR17	-1.36089	0.00868295	0.0261655
		ENSG00000213606	5.95105	11.4499	8.4989	8.47522	1.03757	1.04497	0	7.5649		-1.36049	0.00570443	0.0180818
		ENSG00000180999	17.8531	14.9729	11.686	2.1188	4.15028	1.04497	5.97092	1.0807	C1orf105	-1.36009	0.0041178	0.0135924
		ENSG00000262745	467.157	331.166	384.575	93.2274	95.4566	106.587	99.2665	117.796		-1.35938	1.53713e-06	1.06487e-05
		ENSG00000249574	27.7716	22.019	26.5591	41.3167	8.30057	8.35978	10.4491	12.9684	LOC442497	-1.3582	3.18487e-05	0.000171821
		ENSG00000176454	3866.2	3441.13	3565.29	3965.34	1513.82	1608.21	892.653	1672.92	LPCAT4	-1.35705	5.44247e-18	2.00893e-16
		ENSG00000147804	1293.36	1024.32	969.937	1172.76	436.817	469.192	255.257	552.238	SLC39A4	-1.35703	1.30691e-14	3.21396e-13
		ENSG00000184574	32.7308	14.0922	16.9978	38.1385	2.07514	5.22486	12.6882	10.807	LPAR5	-1.35626	0.00125417	0.00472796
		ENSG00000186998	49.5921	27.3035	28.6838	6.35641	8.30057	11.4947	10.4491	5.4035	EMID1	-1.35608	0.000310354	0.00134157
		ENSG00000167971	11.9021	7.04608	8.4989	6.35641	2.07514	3.13492	0	3.2421	CASKIN1	-1.35594	0.00615937	0.0193346
		ENSG00000229167	157.703	151.491	167.853	105.94	71.5924	54.3385	49.2601	44.3087		-1.35534	2.2255e-11	3.43121e-10
		ENSG00000137845	9606.98	9891.81	9737.61	8700.87	3757.05	3807.88	3180.26	3959.69	ADAM10	-1.35528	1.53804e-47	1.02524e-44
		ENSG00000223394	8.92657	2.64228	5.31181	2.1188	1.03757	0	0	1.0807		-1.35394	0.00962748	0.028601
		ENSG00000179218	24383.4	23606.1	22980	23921.3	8808.98	8651.32	8274.95	11472.7	CALR	-1.35369	4.17213e-56	3.93988e-53
		ENSG00000231203	103.151	93.3605	95.6126	152.554	26.9769	28.2142	36.5719	81.0525		-1.35303	3.06697e-08	2.88422e-07
		ENSG00000099834	769.669	579.54	667.164	1127.2	240.717	279.008	344.074	311.242	CDHR5	-1.35287	1.52757e-18	5.88791e-17
		ENSG00000260139	13.8858	10.5691	8.4989	4.23761	5.18786	1.04497	0	2.1614		-1.35267	0.00735995	0.0226638
		ENSG00000155846	939.274	859.621	963.563	668.483	281.182	342.751	308.995	353.389	PPARGC1B	-1.35262	1.24772e-12	2.3487e-11
		ENSG00000268166	1.98368	6.16532	9.56126	8.47522	0	1.04497	1.49273	1.0807		-1.3519	0.00978031	0.0289791
		ENSG00000137285	152.744	145.325	133.858	67.8017	47.7283	37.619	67.9192	31.3403	TUBB2B	-1.3516	1.8133e-11	2.83816e-10
		ENSG00000259549	80.3391	75.7453	53.1181	32.8415	29.052	12.5397	26.8691	16.2105		-1.35138	2.82206e-06	1.86416e-05
		ENSG00000153885	2194.94	2023.1	1955.81	1064.7	706.586	699.086	588.136	728.392	KCTD15	-1.34937	1.52428e-13	3.23165e-12
		ENSG00000156675	1897.39	1731.57	1789.02	3061.67	893.349	912.261	473.942	888.336	RAB11FIP1	-1.34935	1.89161e-13	3.97327e-12
		ENSG00000156273	3751.14	3107.32	3553.6	1796.75	1143.4	1049.15	1434.51	965.066	BACH1	-1.34895	3.48897e-17	1.17495e-15
		ENSG00000135477	17.8531	14.0922	18.0602	3.17821	3.11271	4.17989	3.73183	3.2421		-1.34869	0.00454131	0.0148007
		ENSG00000173599	1227.9	1169.65	1167.54	1452.44	571.702	588.319	308.249	448.491	PC	-1.34858	1.94901e-14	4.64973e-13
		ENSG00000101695	158.695	140.922	149.793	237.306	56.0288	70.0131	26.8691	112.393	RNF125	-1.34774	3.60561e-09	3.95152e-08
		ENSG00000125247	1549.26	1514.03	1503.24	1115.55	575.852	616.533	423.189	576.013	TMTC4	-1.34681	7.37701e-23	4.53097e-21
		ENSG00000124006	62.486	53.7263	57.3676	28.6039	21.789	16.7196	7.46365	24.8561	OBSL1	-1.34591	7.83388e-05	0.000385134
		ENSG00000167779	4680.5	3568.84	3663.03	2261.82	1103.98	1248.74	1400.93	1650.23	IGFBP6	-1.34521	1.14242e-11	1.85871e-10
		ENSG00000144381	74753.1	81546	77224.2	39801.7	30292.9	28002.1	20755.7	22870.9	HSPD1	-1.34518	9.11567e-18	3.26378e-16
		ENSG00000106258	5177.41	5114.57	6044.84	3609.38	2064.77	2017.84	2074.89	1586.47	CYP3A5	-1.34342	1.02395e-46	5.95046e-44
		ENSG00000104361	286.642	290.651	305.96	157.851	57.0664	43.8888	161.961	94.0209	NIPAL2	-1.34294	3.47478e-05	0.000185693
		ENSG00000116771	1542.31	1650.54	1483.06	908.967	416.066	430.528	670.236	533.866	AGMAT	-1.34271	7.61539e-09	7.88826e-08
		ENSG00000207730	33.7226	16.7344	27.6214	10.594	2.07514	11.4947	8.95638	5.4035	MIR200B	-1.3419	0.000359145	0.00153203
		ENSG00000127364	8.92657	12.3306	12.7484	5.29701	2.07514	2.08994	5.97092	0	TAS2R4	-1.34165	0.00461714	0.0150176
		ENSG00000101353	25.7879	28.1843	21.2473	11.6534	5.18786	6.26983	8.95638	7.5649	MROH8	-1.34142	0.000843211	0.00330804
		ENSG00000214290	157.703	247.493	176.352	416.345	108.945	86.7327	33.5864	134.007	COLCA2	-1.34113	1.40758e-07	1.17631e-06
		ENSG00000139146	11215.7	11792.5	11236.6	8926.52	5237.66	4782.84	2919.03	3706.8	FAM60A	-1.3406	7.10095e-19	2.80865e-17
		ENSG00000218186	13.8858	16.7344	14.8731	99.5838	2.07514	5.22486	2.98546	47.5508		-1.34059	9.11938e-05	0.000441722
		ENSG00000197653	10.9103	5.28456	10.6236	2.1188	1.03757	3.13492	1.49273	1.0807	DNAH10	-1.33902	0.00620358	0.0194633
		ENSG00000104691	465.174	511.721	499.31	257.435	160.824	154.656	162.708	169.67	UBXN8	-1.33799	4.83383e-15	1.2636e-13
		ENSG00000165125	180.515	129.472	168.916	146.197	66.4046	90.9126	28.3619	28.0982	TRPV6	-1.33738	0.000384449	0.00162772
		ENSG00000186314	791.489	803.253	795.71	719.334	283.257	241.389	315.712	363.115	PRELID2	-1.33725	5.12712e-16	1.51107e-14
		ENSG00000215553	7.93473	13.2114	11.686	11.6534	1.03757	2.08994	2.98546	7.5649		-1.3364	0.00250258	0.00874206
		ENSG00000127947	7907.95	8189.3	8426.66	9054.71	3024.52	2711.7	3328.79	4253.64	PTPN12	-1.3357	9.23196e-45	4.54855e-42
		ENSG00000137501	2418.11	2359.55	2604.91	2597.65	826.944	846.427	1082.23	1181.21	SYTL2	-1.33531	1.30155e-36	3.2776e-34
		ENSG00000056998	291.601	325	292.15	62.5047	106.87	100.317	52.9919	70.2455	GYG2	-1.33488	2.48651e-05	0.000137048
		ENSG00000183831	50.5839	57.2494	57.3676	87.9304	22.8266	21.9444	20.1519	30.2596	ANKRD45	-1.33393	2.30151e-09	2.62382e-08
		ENSG00000235387	23.8042	22.8997	16.9978	21.188	9.33814	4.17989	2.98546	10.807	LINC00961	-1.33268	0.00215756	0.00766443
		ENSG00000205426	18.845	21.1382	21.2473	15.891	3.11271	5.22486	9.70275	6.4842	KRT81	-1.33261	0.00104447	0.00400448
		ENSG00000259475	4.95921	12.3306	7.43654	5.29701	2.07514	1.04497	0.746365	3.2421		-1.33132	0.00847835	0.0256068
		ENSG00000215333	15.8695	20.2575	19.1225	31.7821	4.15028	4.17989	4.47819	19.4526		-1.33096	0.000383615	0.00162509
		ENSG00000229108	3.96737	7.92684	2.12473	0	0	0	0	0		-1.33079	0.00859505	0.0259178
		ENSG00000165511	53.5594	59.0109	53.1181	58.2671	23.8641	17.7645	20.8982	21.614		-1.32749	1.16986e-07	9.89687e-07
		ENSG00000169067	3.96737	6.16532	6.37418	1.0594	0	0	0.746365	0	ACTBL2	-1.32724	0.00911532	0.0273086
		ENSG00000242841	24.796	36.1111	33.9956	69.9205	11.4133	9.40475	18.6591	16.2105		-1.32527	4.81448e-05	0.000249402
		ENSG00000114646	126.956	129.472	124.296	82.6334	41.5028	39.7089	50.0065	45.3894	CSPG5	-1.32474	1.33751e-10	1.84276e-09
		ENSG00000115718	87.282	72.2223	53.1181	70.9799	34.2398	20.8994	23.8837	27.0175	PROC	-1.32466	5.10553e-07	3.89162e-06
		ENSG00000251396	1.98368	8.8076	11.686	6.35641	1.03757	2.08994	2.2391	1.0807		-1.3227	0.00784525	0.0239468
		ENSG00000188124	10.9103	5.28456	6.37418	5.29701	1.03757	1.04497	2.2391	2.1614	OR2AG2	-1.3222	0.00861415	0.025972
		ENSG00000221491	6.94289	3.52304	9.56126	5.29701	2.07514	0	1.49273	1.0807	SNORA2C	-1.32077	0.0107082	0.031331
		ENSG00000129009	4.95921	0.88076	3.18709	6.35641	0	0	0.746365	0	ISLR	-1.32067	0.0106208	0.0311154
		ENSG00000136783	473.108	445.664	418.571	391.979	188.838	163.016	172.41	138.33	NIPSNAP3A	-1.31899	4.29582e-08	3.94332e-07
		ENSG00000143167	45.6247	72.2223	58.4299	46.6137	18.6763	24.0344	26.1228	15.1298	GPA33	-1.31795	3.29569e-07	2.59804e-06
		ENSG00000122574	181.507	221.071	212.473	242.603	95.4566	98.2274	46.2746	95.1016	WIPF3	-1.31788	2.81826e-11	4.2753e-10
		ENSG00000262468	22.8124	23.7805	12.7484	12.7128	2.07514	4.17989	5.97092	11.8877	LINC01569	-1.31703	0.000803582	0.00316651
		ENSG00000100906	2180.07	1892.75	1999.37	1701.4	618.392	573.69	1006.85	808.364	NFKBIA	-1.31698	5.36854e-11	7.82965e-10
		ENSG00000115604	15.8695	20.2575	14.8731	4.23761	0	1.04497	3.73183	8.6456	IL18R1	-1.31643	0.00671518	0.0208884
		ENSG00000171345	29972.5	23803.4	24643.6	29942.9	10592.6	11134.2	7826.38	13592	KRT19	-1.316	1.11377e-22	6.71341e-21
		ENSG00000127954	643.705	561.925	649.104	480.968	96.4941	104.497	435.877	154.54	STEAP4	-1.3159	0.000685422	0.00274362
		ENSG00000124249	7.93473	7.04608	8.4989	3.17821	0	2.08994	2.2391	0	KCNK15	-1.31498	0.011927	0.0344305
		ENSG00000107957	1581	1586.25	1575.48	2730.08	839.395	839.112	444.834	720.827	SH3PXD2A	-1.31449	3.9863e-12	6.96036e-11
		ENSG00000267573	4.95921	11.4499	10.6236	27.5445	2.07514	2.08994	3.73183	8.6456		-1.31441	0.00191024	0.00687207
		ENSG00000198976	179.523	165.583	155.105	65.6829	49.8034	71.0581	44.7819	46.4701	MIR429	-1.31286	2.37331e-10	3.1437e-09
		ENSG00000128849	194.401	195.529	209.285	509.572	86.1184	91.9575	86.5783	151.298	CGNL1	-1.31262	3.13188e-16	9.38902e-15
		ENSG00000110811	1092.02	946.817	1013.49	510.632	299.858	338.571	413.486	296.112	P3H3	-1.31258	1.0126e-13	2.17532e-12
		ENSG00000105523	176.548	163.821	160.417	253.197	71.5924	109.722	41.7964	59.4385	FAM83E	-1.3125	7.40945e-07	5.46818e-06
		ENSG00000221625	22.8124	17.6152	26.5591	12.7128	5.18786	7.3148	2.2391	11.8877		-1.31202	0.00206509	0.00736478
		ENSG00000267759	21.8205	15.8537	26.5591	7.41581	7.263	6.26983	6.71729	3.2421		-1.31195	0.000735853	0.00292585
		ENSG00000124155	5732.84	5621.01	5185.39	7616.04	2211.06	2223.7	1939.8	3375.03	PIGT	-1.31193	9.65453e-40	2.95689e-37
		ENSG00000171903	108.111	71.3415	79.6772	4.23761	28.0144	28.2142	14.1809	7.5649	CYP4F11	-1.31169	0.00321373	0.0109232
		ENSG00000272320	7.93473	8.8076	22.3096	16.9504	6.22543	5.22486	2.2391	3.2421		-1.3107	0.00198153	0.00710143
		ENSG00000154511	80.3391	85.4337	79.6772	29.6633	20.7514	24.0344	37.3183	17.2912	FAM69A	-1.31036	2.81318e-06	1.86193e-05
		ENSG00000225950	50.5839	59.8916	59.4923	21.188	9.33814	15.6746	30.601	10.807	NTF4	-1.30966	8.1131e-05	0.00039774
		ENSG00000145882	103.151	104.81	121.109	127.128	60.1791	47.0237	33.5864	37.8245	PCYOX1L	-1.30958	1.57725e-11	2.50152e-10
		ENSG00000167755	6458.87	5123.38	5715.51	6466.59	1572.96	1599.85	2757.82	3439.87	KLK6	-1.30926	1.55202e-08	1.52483e-07
		ENSG00000160181	10.9103	14.0922	9.56126	0	3.11271	1.04497	0	1.0807	TFF2	-1.30925	0.0124714	0.035806
		ENSG00000271602	68.4371	43.1572	41.4321	103.821	14.526	15.6746	14.1809	63.7613		-1.30864	2.90487e-06	1.91162e-05
		ENSG00000271270	38.6818	64.2954	80.7396	23.3068	23.8641	25.0793	15.6737	10.807	TMCC1-AS1	-1.3085	1.09289e-05	6.49427e-05
		ENSG00000271452	20.8287	11.4499	14.8731	19.0692	3.11271	7.3148	5.22456	6.4842		-1.3076	0.00118453	0.00450364
		ENSG00000134874	12.8939	14.9729	12.7484	8.47522	3.11271	1.04497	3.73183	7.5649	DZIP1	-1.30716	0.00316969	0.0108011
		ENSG00000268816	33.7226	20.2575	35.058	42.3761	6.22543	8.35978	13.4346	19.4526		-1.30665	5.02941e-05	0.000259119
		ENSG00000197586	9518.7	8520.47	8277.93	8246.38	3801.66	3840.27	2663.03	3505.79	ENTPD6	-1.3064	1.36069e-28	1.53741e-26
		ENSG00000140682	127.948	87.1952	115.798	103.821	43.578	34.4841	38.0646	52.9543	TGFB1I1	-1.30633	1.17456e-07	9.93292e-07
		ENSG00000157064	8.92657	7.04608	19.1225	0	0	0	0	3.2421	NMNAT2	-1.30625	0.00972354	0.0288448
		ENSG00000135253	91.2494	67.8185	91.3632	75.2175	24.9017	38.664	30.601	31.3403	KCP	-1.30624	3.25297e-08	3.04147e-07
		ENSG00000211455	4090.35	4432.86	4545.85	4524.71	2105.23	2070.09	1094.92	1678.33	STK38L	-1.30567	6.46047e-15	1.66576e-13
		ENSG00000257576	141.833	122.426	130.671	261.672	46.6907	39.7089	47.7674	141.572		-1.30501	2.72945e-13	5.63905e-12
		ENSG00000234743	45.6247	34.3496	22.3096	171.623	10.3757	16.7196	11.1955	63.7613		-1.30432	1.26254e-06	8.92573e-06
		ENSG00000170485	660.566	835.841	724.531	1078.47	304.008	323.941	241.822	461.459	NPAS2	-1.30391	1.37534e-26	1.26197e-24
		ENSG00000121316	257.879	327.643	280.464	190.692	91.3063	105.542	122.404	96.1824	PLBD1	-1.30275	2.69905e-18	1.02122e-16
		ENSG00000255964	16.8613	7.04608	13.8107	58.2671	4.15028	5.22486	1.49273	22.6947		-1.30241	0.000888979	0.00347137
		ENSG00000140391	26386	26043.2	24962.3	17683.5	8783.04	8613.7	9976.66	10446.1	TSPAN3	-1.30205	2.32712e-20	1.07417e-18
		ENSG00000112541	2794.02	2928.53	3062.79	1883.62	1028.23	1097.22	1006.85	1059.09	PDE10A	-1.30108	6.78284e-18	2.46356e-16
		ENSG00000171747	31638.7	33079.6	29336.1	23846.1	13501.9	13366.2	9037.73	10860	LGALS4	-1.29962	1.61328e-19	6.88578e-18
		ENSG00000140279	21.8205	14.9729	26.5591	8.47522	5.18786	11.4947	3.73183	3.2421	DUOX2	-1.29962	0.00138541	0.00516939
		ENSG00000159618	1156.49	1063.96	958.251	681.195	396.352	389.775	393.334	353.389	ADGRG5	-1.29904	1.06097e-30	1.44854e-28
		ENSG00000068489	1729.77	1944.72	1774.15	2765.04	734.6	793.134	725.467	1042.88	PRR11	-1.29847	4.34227e-39	1.23016e-36
		ENSG00000130309	6051.22	5207.93	5336.25	5110.55	2087.59	2082.63	1892.04	2688.78	COLGALT1	-1.29832	1.39546e-24	1.04035e-22
		ENSG00000238279	68.4371	63.4147	61.617	97.465	13.4884	35.529	30.601	30.2596		-1.29798	6.2414e-08	5.5691e-07
		ENSG00000164764	1643.48	1630.29	1632.85	2340.22	627.731	589.364	646.352	1113.12	SBSPON	-1.29796	4.2643e-45	2.1965e-42
		ENSG00000236682	348.136	347.019	346.33	166.326	112.058	85.6877	175.396	85.3753		-1.2979	2.11267e-08	2.03233e-07
		ENSG00000213430	170.597	159.417	213.535	357.018	54.9913	75.238	45.5283	221.544		-1.29737	2.2886e-10	3.04216e-09
		ENSG00000102879	351.112	284.485	275.152	377.147	121.396	122.262	79.8611	206.414	CORO1A	-1.29647	2.97343e-13	6.09312e-12
		ENSG00000272079	107.119	85.4337	110.486	75.2175	37.3526	32.3941	38.811	37.8245		-1.29622	2.18041e-09	2.4958e-08
		ENSG00000215481	5.95105	8.8076	10.6236	6.35641	1.03757	3.13492	2.2391	2.1614		-1.29579	0.00569507	0.0180648
		ENSG00000040199	3154.06	3314.3	3396.37	2156.94	957.678	965.554	1591.25	1190.93	PHLPP2	-1.29566	2.60201e-14	6.11741e-13
		ENSG00000100596	5835	5511.79	6176.58	5962.31	2114.57	2003.21	2727.96	2570.99	SPTLC2	-1.29517	2.91671e-20	1.3274e-18
		ENSG00000189120	2389.35	2119.11	2135.35	1499.05	991.918	994.813	606.048	612.757	SP6	-1.29431	3.62197e-11	5.42195e-10
		ENSG00000064199	231.099	239.567	257.092	107	78.8554	70.0131	71.651	89.6981	SPA17	-1.29354	1.95549e-08	1.88833e-07
		ENSG00000244649	989.858	885.163	1025.18	310.405	271.844	253.928	294.814	324.21		-1.29268	1.96908e-07	1.60935e-06
		ENSG00000019102	3064.79	2897.7	2927.87	1975.78	1429.77	1295.77	741.887	821.332	VSIG2	-1.29142	8.69197e-12	1.43897e-10
		ENSG00000116983	12.8939	14.0922	9.56126	4.23761	5.18786	3.13492	2.2391	0	HPCAL4	-1.2913	0.0105852	0.0310194
		ENSG00000132334	209.279	200.813	181.664	212.94	42.5404	54.3385	88.0711	145.895	PTPRE	-1.29129	3.97278e-08	3.66907e-07
		ENSG00000158711	3398.05	3651.63	3813.88	3471.66	1374.78	1393.99	1371.07	1691.3	ELK4	-1.28978	2.57511e-43	1.06224e-40
		ENSG00000138449	4607.1	4658.34	4805.07	4310.71	2060.62	1875.72	1551.69	1975.52	SLC40A1	-1.28894	1.13755e-39	3.39228e-37
		ENSG00000171476	83.3147	89.8375	89.2385	83.6928	32.1647	41.7989	12.6882	38.9052	HOPX	-1.28819	0.000166318	0.000758591
		ENSG00000141542	717.101	659.689	644.854	645.176	296.745	306.177	118.672	332.856	RAB40B	-1.28784	2.51797e-08	2.39275e-07
		ENSG00000178934	60.5023	36.9919	52.0558	8.47522	14.526	15.6746	11.9418	9.72631	LGALS7	-1.28746	0.000668916	0.00268562
		ENSG00000143140	9.91841	12.3306	16.9978	15.891	6.22543	5.22486	2.2391	2.1614		-1.28709	0.00680639	0.0211402
		ENSG00000162512	880.755	739.838	842.453	237.306	246.942	253.928	392.588	127.523	SDC3	-1.28647	4.08251e-09	4.4377e-08
		ENSG00000174938	1889.46	1633.81	1582.92	1479.98	672.346	681.322	516.485	804.041	SEZ6L2	-1.28631	1.20903e-21	6.37244e-20
		ENSG00000040608	2007.49	1103.59	1242.96	1477.87	471.057	625.938	406.023	900.224	RTN4R	-1.28597	1.67578e-09	1.95069e-08
		ENSG00000164300	1073.17	960.028	1118.67	1157.93	395.315	411.719	384.378	570.61	SERINC5	-1.28592	2.06899e-26	1.8832e-24
		ENSG00000271828	14.8776	22.8997	26.5591	14.8316	4.15028	6.26983	8.95638	7.5649		-1.28535	0.000713163	0.00284512
		ENSG00000260461	44.6329	51.9648	63.7418	85.8116	23.8641	15.6746	19.4055	36.7438		-1.28529	1.74259e-06	1.1957e-05
		ENSG00000265121	5.95105	7.04608	7.43654	8.47522	2.07514	0	2.98546	2.1614		-1.2848	0.0101885	0.0299886
		ENSG00000255120	37.69	38.7534	56.3052	14.8316	13.4884	17.7645	11.1955	10.807	OVOL1-AS1	-1.28474	8.58281e-05	0.000418685
		ENSG00000214691	6.94289	2.64228	4.24945	3.17821	1.03757	0	1.49273	0	LOC388942	-1.28366	0.0140476	0.0396826
		ENSG00000213937	336.234	233.401	274.09	147.257	86.1184	80.4628	121.657	92.9402	CLDN9	-1.28297	1.14613e-10	1.5946e-09
		ENSG00000237489	8.92657	10.5691	8.4989	9.53462	3.11271	3.13492	2.98546	2.1614		-1.28284	0.00450845	0.0147063
		ENSG00000260833	426.492	447.426	499.31	520.166	214.777	237.209	171.664	135.088		-1.2826	3.93065e-07	3.05711e-06
		ENSG00000263089	17.8531	35.2304	21.2473	19.0692	7.263	11.4947	3.73183	10.807		-1.28221	0.000577757	0.00235128
		ENSG00000138758	7392.19	7614.17	7436.54	6286.49	2922.84	2994.89	2481.66	3310.19	2011-09-01	-1.28218	2.16106e-32	3.73879e-30
		ENSG00000253330	51.5757	52.8456	90.3008	11.6534	11.4133	5.22486	32.0937	15.1298		-1.28193	0.00196257	0.00704237
		ENSG00000179292	26.7797	13.2114	16.9978	3.17821	3.11271	2.08994	5.22456	6.4842	TMEM151A	-1.28155	0.00834589	0.0252538
		ENSG00000227620	10.9103	8.8076	20.1849	4.23761	4.15028	5.22486	2.98546	1.0807		-1.28064	0.00733637	0.0226004
		ENSG00000249193	20.8287	14.9729	11.686	55.0889	4.15028	6.26983	3.73183	24.8561		-1.27953	0.000171987	0.000782399
		ENSG00000125538	20.8287	23.7805	21.2473	16.9504	4.15028	4.17989	2.98546	19.4526	IL1B	-1.2789	0.00220258	0.00780475
		ENSG00000116663	5.95105	9.68835	14.8731	4.23761	3.11271	1.04497	2.2391	3.2421	FBXO6	-1.27741	0.00691951	0.0214504
		ENSG00000139626	237.05	188.483	247.53	205.524	88.1936	99.2723	58.2165	102.667	ITGB7	-1.27715	1.27067e-08	1.26562e-07
		ENSG00000178996	1207.07	1131.78	1110.17	1340.14	491.809	490.092	430.653	555.48	SNX18	-1.27673	2.75119e-46	1.55882e-43
		ENSG00000163082	1955.91	1810.84	1828.33	2426.03	812.418	740.885	669.489	1068.81	SGPP2	-1.27668	4.21308e-27	4.13356e-25
		ENSG00000249375	21.8205	29.0651	30.8085	5.29701	14.526	6.26983	4.47819	4.3228	CASC11	-1.27639	0.00087773	0.00343217
		ENSG00000140479	2431	2370.12	2245.83	2016.04	931.739	893.451	832.943	1062.33	PCSK6	-1.27488	1.09794e-31	1.74011e-29
		ENSG00000231845	1.98368	7.92684	6.37418	1.0594	0	1.04497	0	1.0807		-1.27438	0.0137479	0.0389382
		ENSG00000228445	21.8205	21.1382	23.372	4.23761	3.11271	6.26983	6.71729	5.4035		-1.27418	0.00478034	0.0154818
		ENSG00000129667	2294.13	1764.16	1954.75	1321.07	646.407	754.47	725.467	831.059	RHBDF2	-1.27315	1.03663e-14	2.58178e-13
		ENSG00000120057	9.91841	21.1382	16.9978	1.0594	4.15028	1.04497	4.47819	3.2421	SFRP5	-1.27307	0.00737665	0.0227091
		ENSG00000161395	1085.07	1045.46	1014.56	475.671	382.864	376.19	359.748	302.596	PGAP3	-1.2729	2.29081e-19	9.59685e-18
		ENSG00000131037	8027.96	6103.66	6486.79	6532.27	2268.13	2588.4	2835.44	3458.24	EPS8L1	-1.27254	2.70423e-19	1.12663e-17
		ENSG00000232406	7.93473	11.4499	15.9354	0	1.03757	1.04497	3.73183	2.1614		-1.27243	0.0100694	0.0297186
		ENSG00000149418	34140.2	27714	27610.8	29987.4	10490.9	10846.8	12995.7	14981.8	ST14	-1.27143	1.14575e-23	7.61506e-22
		ENSG00000259470	32.7308	19.3767	23.372	37.0791	7.263	2.08994	13.4346	18.3719		-1.2684	0.000386961	0.00163682
		ENSG00000112320	3.96737	2.64228	3.18709	9.53462	0	2.08994	0	0	SOBP	-1.26688	0.013156	0.0374913
		ENSG00000110944	115.054	100.407	109.423	20.1286	22.8266	30.3042	45.5283	21.614	IL23A	-1.26667	0.000271747	0.00118989
		ENSG00000074416	10210	8744.18	9140.57	5843.66	2976.79	3039.82	3919.91	3627.91	MGLL	-1.26663	5.26311e-14	1.17985e-12
		ENSG00000197461	510.798	499.391	462.128	582.671	190.913	194.365	185.099	279.901	PDGFA	-1.26601	1.7994e-17	6.23573e-16
		ENSG00000137822	2343.72	2430.9	2449.81	2339.16	1010.59	1002.13	869.515	1049.36	TUBGCP4	-1.26451	6.53606e-26	5.76394e-24
		ENSG00000133475	7.93473	1.76152	5.31181	0	1.03757	0	0	0	GGT2	-1.26444	0.0155843	0.0434176
		ENSG00000263400	3.96737	8.8076	5.31181	2.1188	1.03757	0	0.746365	2.1614	TMEM220-AS1	-1.26276	0.0122689	0.0352691
		ENSG00000267905	12.8939	8.8076	30.8085	4.23761	5.18786	7.3148	2.98546	1.0807		-1.26257	0.00687219	0.0213183
		ENSG00000165795	950.184	1098.31	881.761	808.324	434.742	470.237	315.712	322.049	NDRG2	-1.26195	3.90405e-22	2.18473e-20
		ENSG00000011422	4401.79	3625.21	3957.3	1843.36	1029.27	1011.53	1992.05	1306.57	PLAUR	-1.25838	8.26497e-09	8.51443e-08
		ENSG00000267010	11.9021	9.68835	14.8731	11.6534	5.18786	2.08994	3.73183	4.3228		-1.25832	0.00419387	0.0138053
		ENSG00000164626	2042.2	1941.19	1944.12	1300.95	654.707	723.121	871.754	677.599	KCNK5	-1.25808	2.22024e-16	6.77248e-15
		ENSG00000236914	30.7471	38.7534	29.7462	26.485	13.4884	13.5846	14.9273	6.4842		-1.25779	5.91331e-05	0.000299956
		ENSG00000224928	31.7389	29.0651	24.4343	11.6534	6.22543	9.40475	7.46365	11.8877		-1.25758	0.000596496	0.00241886
		ENSG00000250659	12.8939	7.92684	16.9978	1.0594	2.07514	2.08994	5.97092	0		-1.25744	0.00995978	0.0294262
		ENSG00000141441	1644.47	1467.35	1553.17	880.363	505.297	539.206	615.751	582.498	GAREM1	-1.25728	9.15786e-14	1.98616e-12
		ENSG00000111907	481.043	490.583	478.063	504.275	211.665	212.129	205.25	180.477	TPD52L1	-1.25722	1.19164e-35	2.70074e-33
		ENSG00000234382	11.9021	3.52304	9.56126	4.23761	3.11271	2.08994	1.49273	1.0807		-1.25711	0.013303	0.0378529
		ENSG00000225193	33.7226	37.8727	56.3052	10.594	10.3757	20.8994	12.6882	5.4035		-1.25695	0.000437429	0.00182846
		ENSG00000128242	74.3881	66.057	69.0536	139.841	24.9017	22.9894	41.0501	39.9859	GAL3ST1	-1.25668	0.000143462	0.000664098
		ENSG00000102554	21699.5	23241.5	22123.7	23707.3	9815.42	9191.57	7028.52	11967.7	KLF5	-1.2565	8.85566e-27	8.29358e-25
		ENSG00000070404	475.092	286.247	373.952	148.316	134.884	131.666	100.759	129.684	FSTL3	-1.25638	6.46769e-07	4.82891e-06
		ENSG00000224452	0.991841	12.3306	7.43654	3.17821	0	2.08994	0.746365	1.0807		-1.25632	0.0162075	0.0449165
		ENSG00000234928	14.8776	14.0922	6.37418	11.6534	6.22543	3.13492	0	3.2421	LOC101929374	-1.25631	0.0106828	0.0312769
		ENSG00000251102	6.94289	6.16532	5.31181	51.9107	4.15028	2.08994	2.2391	10.807		-1.25593	0.00394068	0.0130687
		ENSG00000077063	56.535	53.7263	44.6192	72.0393	17.6387	22.9894	12.6882	37.8245	CTTNBP2	-1.25585	1.40201e-06	9.79205e-06
		ENSG00000155465	312.43	222.832	261.341	203.405	68.4797	88.8226	152.258	88.6174	SLC7A7	-1.25462	8.05451e-09	8.32409e-08
		ENSG00000116194	2.97552	6.16532	11.686	3.17821	0	0	1.49273	3.2421	ANGPTL1	-1.25436	0.0162995	0.0451218
		ENSG00000073067	78.3555	58.1301	76.4901	34.9603	30.0896	31.3492	14.1809	20.5333	CYP2W1	-1.25404	8.62352e-06	5.22576e-05
		ENSG00000255992	3.96737	11.4499	9.56126	8.47522	2.07514	3.13492	2.2391	2.1614		-1.2536	0.00953177	0.0283613
		ENSG00000269427	21.8205	58.1301	29.7462	19.0692	11.4133	13.5846	14.9273	7.5649		-1.25356	0.000367435	0.00156298
		ENSG00000235529	54.5513	73.9838	65.8665	55.0889	26.9769	32.3941	19.4055	20.5333	AGAP1-IT1	-1.25294	3.81452e-06	2.46584e-05
		ENSG00000272622	61.4942	47.561	56.3052	58.2671	23.8641	24.0344	23.1373	17.2912		-1.25271	2.97e-07	2.35852e-06
		ENSG00000197013	69.4289	73.103	52.0558	72.0393	18.6763	22.9894	17.1664	54.035	ZNF429	-1.2519	7.02145e-07	5.20557e-06
		ENSG00000182489	175.556	213.144	189.101	355.959	104.795	88.8226	45.5283	138.33	XKRX	-1.25143	1.50598e-09	1.76117e-08
		ENSG00000081059	2435.96	2352.51	2270.27	2293.61	907.875	963.464	733.677	1306.57	TCF7	-1.25053	2.07066e-17	7.08903e-16
		ENSG00000243566	1329.07	888.686	1002.87	720.393	324.76	370.965	493.347	376.084	UPK3B	-1.24788	1.52208e-08	1.49789e-07
		ENSG00000167105	613.95	465.922	515.246	387.741	215.815	217.354	194.055	193.445	TMEM92	-1.24783	6.59475e-22	3.61897e-20
		ENSG00000127152	436.41	524.933	433.444	548.77	218.928	191.23	86.5783	305.838	BCL11B	-1.24666	3.02029e-07	2.39677e-06
		ENSG00000154822	661.558	694.919	676.725	318.88	269.769	239.299	219.431	212.898	PLCL2	-1.24619	2.50393e-12	4.5039e-11
		ENSG00000124107	37.69	42.2765	23.372	23.3068	2.07514	4.17989	28.3619	2.1614	SLPI	-1.24556	0.0116861	0.0338254
		ENSG00000143502	10.9103	10.5691	14.8731	9.53462	7.263	0	0	4.3228	SUSD4	-1.24507	0.0157474	0.0438289
		ENSG00000006042	61.4942	73.9838	57.3676	22.2474	28.0144	33.4391	5.97092	8.6456	TMEM98	-1.24477	0.00157716	0.00579238
		ENSG00000236095	3.96737	1.76152	2.12473	8.47522	0	1.04497	0.746365	0		-1.24469	0.0172805	0.0474262
		ENSG00000228294	13.8858	12.3306	9.56126	3.17821	3.11271	1.04497	2.2391	4.3228	BMS1P17	-1.24431	0.0113179	0.0328985
		ENSG00000140678	26.7797	12.3306	20.1849	23.3068	2.07514	3.13492	1.49273	29.1789	ITGAX	-1.24387	0.00696742	0.0215871
		ENSG00000164761	23.8042	19.3767	20.1849	5.29701	5.18786	5.22486	5.22456	7.5649	TNFRSF11B	-1.24331	0.00194867	0.00699362
		ENSG00000224592	15.8695	11.4499	9.56126	11.6534	3.11271	5.22486	3.73183	4.3228		-1.24327	0.00369979	0.0123822
		ENSG00000227285	14.8776	11.4499	13.8107	32.8415	3.11271	5.22486	8.21002	6.4842		-1.24317	0.00527114	0.0168664
		ENSG00000149260	3570.63	3414.7	3184.96	3794.78	1367.52	1478.64	1524.08	1464.35	CAPN5	-1.24303	4.55736e-30	5.83548e-28
		ENSG00000236065	5.95105	5.28456	5.31181	1.0594	0	0	0	2.1614		-1.24097	0.0165025	0.0456112
		ENSG00000173389	10.9103	12.3306	9.56126	5.29701	4.15028	1.04497	4.47819	0	IQCF1	-1.24092	0.0134714	0.0382554
		ENSG00000136842	23.8042	21.1382	23.372	12.7128	9.33814	9.40475	5.22456	5.4035	TMOD1	-1.24084	0.00136738	0.00510801
		ENSG00000179674	1329.07	1270.06	1537.24	207.643	344.474	337.526	555.296	284.224	ARL14	-1.24035	2.14572e-05	0.000120165
		ENSG00000090776	13873.9	11049.1	11432.1	7652.06	4463.63	4686.7	4073.66	4879.36	EFNB1	-1.24005	8.48995e-15	2.14511e-13
		ENSG00000264109	15.8695	28.1843	36.1203	13.7722	9.33814	9.40475	10.4491	5.4035		-1.23934	0.000172576	0.000784762
		ENSG00000207697	11.9021	11.4499	12.7484	3.17821	3.11271	3.13492	3.73183	2.1614	MIR573	-1.2382	0.00551848	0.0175735
		ENSG00000261338	59.5105	59.8916	67.9912	61.4453	21.789	34.4841	19.4055	23.7754		-1.23767	7.29765e-06	4.48222e-05
		ENSG00000149136	17596.3	17944.6	16763	19368	6779.49	6465.24	7749.51	9207.57	SSRP1	-1.23754	8.42111e-30	1.06031e-27
		ENSG00000232354	37.69	46.6803	57.3676	31.7821	16.6011	17.7645	14.9273	18.3719		-1.23658	3.11181e-05	0.0001684
		ENSG00000165156	7327.72	7953.26	7821.11	7351.19	2741.26	2761.86	3685.55	3586.85	ZHX1	-1.23599	4.08116e-23	2.57647e-21
		ENSG00000230638	22.8124	21.1382	27.6214	9.53462	4.15028	4.17989	11.1955	6.4842		-1.23582	0.00513919	0.0164955
		ENSG00000128596	70.4207	96.8835	97.7374	21.188	22.8266	31.3492	14.9273	34.5824	CCDC136	-1.2353	0.00190764	0.00686485
		ENSG00000215208	6.94289	6.16532	4.24945	18.0098	1.03757	3.13492	0	6.4842		-1.23489	0.0114154	0.0331562
		ENSG00000123838	22.8124	14.0922	12.7484	23.3068	5.18786	4.17989	5.97092	10.807	C4BPA	-1.23444	0.000586172	0.00238125
		ENSG00000113303	4.95921	5.28456	7.43654	6.35641	1.03757	0	2.98546	0	BTNL8	-1.23428	0.017811	0.0486857
		ENSG00000221914	3749.16	3714.16	3905.24	2880.51	1452.6	1535.06	1603.19	1393.02	PPP2R2A	-1.23413	9.95119e-50	7.51779e-47
		ENSG00000125753	11436.9	10209.8	9716.37	11717	4809.14	4847.62	3228.78	5191.69	VASP	-1.23406	3.98952e-20	1.79047e-18
		ENSG00000139832	2505.39	2224.8	2031.24	2391.07	1011.63	1040.79	849.363	960.743	RAB20	-1.23403	3.2194e-36	7.76218e-34
		ENSG00000170442	62.486	57.2494	64.8041	39.1979	15.5636	21.9444	33.5864	15.1298	KRT86	-1.2339	4.36271e-05	0.000228194
		ENSG00000143061	5932.2	5253.73	5379.8	4561.78	1967.23	2076.36	2190.58	2712.56	IGSF3	-1.23356	2.04531e-23	1.33974e-21
		ENSG00000172216	1690.1	1255.96	1334.33	2612.49	487.658	510.991	697.105	1269.82	CEBPB	-1.23324	6.61582e-17	2.16053e-15
		ENSG00000248375	18.845	7.04608	9.56126	5.29701	2.07514	1.04497	1.49273	6.4842		-1.23285	0.00819434	0.0248517
		ENSG00000229835	29.7552	24.6613	24.4343	30.7227	10.3757	7.3148	8.21002	17.2912		-1.2327	1.75628e-05	0.000100187
		ENSG00000133818	2650.2	2749.73	2669.72	2294.66	1127.84	1028.25	931.464	1283.87	RRAS2	-1.23163	2.94493e-25	2.40086e-23
		ENSG00000244459	26.7797	25.542	32.9332	24.3662	14.526	7.3148	8.95638	10.807		-1.2316	0.000275526	0.00120504
		ENSG00000134954	3259.19	2545.4	2984.18	1608.17	665.083	660.422	1231.5	1829.63	ETS1	-1.23074	4.76409e-06	3.01947e-05
		ENSG00000069275	8799.62	9854.82	9314.79	10233.8	4126.42	3905.06	3144.44	5062	NUCKS1	-1.2305	5.10769e-29	5.99796e-27
		ENSG00000134247	3291.92	3086.18	3022.42	3234.35	1403.83	1286.36	1087.45	1525.95	PTGFRN	-1.22956	1.88364e-15	5.18723e-14
		ENSG00000204876	2629.37	2558.61	2699.46	1125.08	914.1	908.081	856.827	920.757		-1.22904	2.01521e-11	3.124e-10
		ENSG00000089723	349.128	338.212	329.332	323.118	140.072	136.891	103.745	186.961	OTUB2	-1.22863	1.49988e-12	2.78861e-11
		ENSG00000101441	3.96737	2.64228	6.37418	20.1286	2.07514	1.04497	0	4.3228	CST4	-1.22857	0.0178475	0.0487696
		ENSG00000101076	4625.95	4441.67	4378	3166.55	1816.79	1757.64	1501.69	1824.22	HNF4A	-1.22837	1.972e-13	4.13445e-12
		ENSG00000253309	106.127	111.856	110.486	133.485	50.841	34.4841	50.7528	55.1157	SERPINE3	-1.22682	3.25569e-11	4.90931e-10
		ENSG00000185565	31.7389	30.8266	48.8687	26.485	3.11271	3.13492	14.1809	31.3403	LSAMP	-1.22677	0.00570212	0.0180796
		ENSG00000181038	251.928	243.09	237.969	215.059	104.795	94.0475	90.3102	106.989	METTL23	-1.22662	5.61614e-14	1.25527e-12
		ENSG00000103888	7169.03	6747.5	7413.17	6879.76	3750.82	3799.52	834.436	2313.78	CEMIP	-1.22584	0.000381909	0.00161908
		ENSG00000163435	6158.34	5740.79	5840.87	6003.63	2877.18	2761.86	2130.13	2300.81	ELF3	-1.22565	4.52785e-31	6.66359e-29
		ENSG00000212242	9.91841	4.4038	4.24945	4.23761	1.03757	2.08994	1.49273	1.0807		-1.2234	0.0163364	0.0452127
		ENSG00000169247	543.529	459.756	506.747	626.107	241.754	254.973	240.33	164.266	SH3TC2	-1.22292	5.79764e-08	5.20387e-07
		ENSG00000111816	1077.14	1202.24	1204.72	1210.9	484.546	517.261	485.137	515.494	FRK	-1.22277	2.40732e-54	2.02072e-51
		ENSG00000198142	3575.59	3792.55	3712.96	3489.67	1580.22	1513.12	1194.93	1927.97	SOWAHC	-1.22227	6.1754e-24	4.25408e-22
		ENSG00000070614	1979.72	1761.52	1701.9	1367.69	716.962	828.663	594.107	702.455	NDST1	-1.22101	2.33176e-14	5.50489e-13
		ENSG00000196754	405.663	361.992	449.379	99.5838	104.795	85.6877	178.381	105.909	S100A2	-1.22027	1.63234e-05	9.38254e-05
		ENSG00000113721	6.94289	7.92684	6.37418	4.23761	4.15028	1.04497	0.746365	1.0807	PDGFRB	-1.22021	0.0137169	0.0388599
		ENSG00000172992	861.91	857.86	733.03	698.146	320.61	376.19	306.01	330.694	DCAKD	-1.2201	2.81958e-20	1.28837e-18
		ENSG00000107618	12.8939	20.2575	20.1849	13.7722	9.33814	3.13492	3.73183	6.4842		-1.22009	0.00639702	0.019992
		ENSG00000124253	21.8205	29.0651	33.9956	38.1385	13.4884	14.6296	2.98546	11.8877	PCK1	-1.22007	0.00279598	0.00965359
		ENSG00000171310	111.086	87.1952	93.4879	131.366	24.9017	20.8994	37.3183	99.4245	CHST11	-1.21979	4.88228e-05	0.000252284
		ENSG00000173210	3671.8	3302.85	3420.81	4332.95	1467.13	1492.22	1337.49	2029.56	ABLIM3	-1.21868	1.01277e-35	2.34219e-33
		ENSG00000106991	1300.3	1242.75	1194.1	704.502	343.436	337.526	637.396	490.638	ENG	-1.21669	5.92015e-09	6.27275e-08
		ENSG00000150667	106.127	64.2954	109.423	43.4355	32.1647	20.8994	52.2456	20.5333	FSIP1	-1.21604	1.7792e-05	0.000101316
		ENSG00000142677	3377.22	3040.38	3064.92	2171.77	1255.46	1289.5	1083.72	1291.44	IL22RA1	-1.21587	1.58054e-20	7.49399e-19
		ENSG00000270109	21.8205	21.1382	31.8709	8.47522	11.4133	9.40475	9.70275	1.0807		-1.21507	0.00128443	0.00482599
		ENSG00000055163	364.998	394.58	376.076	566.78	156.673	121.217	169.425	287.466	CYFIP2	-1.21462	3.67579e-18	1.37472e-16
		ENSG00000068078	4521.8	4133.4	3932.87	1675.97	1751.42	1845.42	928.478	1145.54	FGFR3	-1.21449	2.18048e-08	2.09223e-07
		ENSG00000131771	672.468	777.711	618.295	491.563	355.887	310.357	258.989	166.428	PPP1R1B	-1.2139	3.99228e-09	4.34378e-08
		ENSG00000077585	308.463	305.624	338.894	150.435	121.396	105.542	79.8611	142.652	GPR137B	-1.21386	5.1273e-07	3.90606e-06
		ENSG00000232729	21.8205	18.496	16.9978	8.47522	3.11271	6.26983	5.22456	8.6456	LOC101926943	-1.21374	0.00282676	0.00974532
		ENSG00000228638	104.143	96.8835	91.3632	60.3859	33.2023	38.664	39.5573	34.5824		-1.21369	9.54624e-10	1.15022e-08
		ENSG00000139505	1190.21	1253.32	1275.9	939.69	587.265	509.946	473.942	421.473	MTMR6	-1.21367	7.8276e-35	1.65799e-32
		ENSG00000177096	306.479	273.035	242.219	193.871	115.17	121.217	102.252	90.7788	FAM109B	-1.21348	2.50609e-15	6.78591e-14
		ENSG00000188177	206.303	195.529	169.978	259.553	71.5924	71.0581	117.926	81.0525	ZC3H6	-1.21292	9.67499e-11	1.36026e-09
		ENSG00000167191	44.6329	44.9187	41.4321	18.0098	16.6011	16.7196	8.95638	16.2105	GPRC5B	-1.21285	8.87687e-05	0.000430988
		ENSG00000267804	20.8287	28.1843	20.1849	30.7227	8.30057	14.6296	5.22456	10.807		-1.2118	0.000222785	0.0009906
		ENSG00000227115	5.95105	10.5691	11.686	19.0692	4.15028	3.13492	5.97092	1.0807	LINC01630	-1.21117	0.00816515	0.0247797
		ENSG00000139800	100.176	88.9567	93.4879	25.4256	35.2774	17.7645	30.601	31.3403	ZIC5	-1.21066	5.44376e-05	0.000278379
		ENSG00000179295	9847.99	10406.2	10017	10603.6	4871.4	4421.28	3329.53	4880.44	PTPN11	-1.20997	2.24758e-23	1.45541e-21
		ENSG00000078369	16850.4	16458.8	15604	15827.5	6493.12	6469.42	5923.15	9125.44	GNB1	-1.20977	2.8107e-24	2.04172e-22
		ENSG00000154065	448.312	347.019	413.259	405.751	128.659	154.656	140.317	275.579	ANKRD29	-1.20949	8.35804e-09	8.59468e-08
		ENSG00000186891	22.8124	21.1382	36.1203	5.29701	4.15028	8.35978	8.21002	7.5649	TNFRSF18	-1.20931	0.00396927	0.0131462
		ENSG00000069399	1325.1	1063.08	1085.73	1053.05	448.231	483.822	481.405	529.543	BCL3	-1.2085	4.81731e-29	5.68644e-27
		ENSG00000120705	11079.9	11459.6	10684.2	7667.95	4761.41	4377.39	3858.71	4316.32	ETF1	-1.20737	1.49812e-22	8.88831e-21
		ENSG00000256968	3.96737	9.68835	12.7484	5.29701	2.07514	2.08994	0.746365	4.3228		-1.20681	0.0129825	0.0370621
		ENSG00000257043	8.92657	10.5691	9.56126	14.8316	1.03757	6.26983	2.2391	5.4035		-1.20671	0.00611171	0.0191957
		ENSG00000260273	15.8695	12.3306	21.2473	8.47522	4.15028	5.22486	5.97092	4.3228		-1.2067	0.00444769	0.0145227
		ENSG00000177993	27.7716	14.9729	14.8731	12.7128	6.22543	7.3148	5.97092	6.4842	ZNRF3-AS1	-1.20585	0.00178698	0.00648521
		ENSG00000176153	22298.6	21074.8	19861.9	17002.3	9184.58	9216.65	5399.95	10449.3	GPX2	-1.2051	5.75675e-12	9.81723e-11
		ENSG00000057704	379.875	408.672	463.19	297.692	163.936	171.375	101.506	224.786	TMCC3	-1.20444	4.89984e-09	5.28055e-08
		ENSG00000227401	17.8531	24.6613	19.1225	8.47522	3.11271	6.26983	6.71729	8.6456		-1.20444	0.00231306	0.00816562
		ENSG00000223855	18.845	6.16532	11.686	16.9504	2.07514	6.26983	5.97092	2.1614	HRAT92	-1.20403	0.00729509	0.0224886
		ENSG00000140280	409.63	365.515	431.319	244.722	77.8178	70.0131	243.315	128.603	LYSMD2	-1.20395	0.00238408	0.00838238
		ENSG00000139793	5252.79	5006.24	5218.32	5300.19	1900.83	1892.44	2233.87	3086.48	MBNL2	-1.20382	1.32957e-25	1.14575e-23
		ENSG00000189221	1620.67	1769.45	1659.41	1542.49	846.658	840.157	507.528	624.645	MAOA	-1.20375	1.12954e-15	3.15657e-14
		ENSG00000145113	40.6655	44.9187	64.8041	29.6633	11.4133	24.0344	10.4491	25.9368	MUC4	-1.20132	0.000709951	0.0028338
		ENSG00000259645	8.92657	24.6613	26.5591	9.53462	6.22543	11.4947	3.73183	3.2421		-1.19994	0.00435389	0.0142596
		ENSG00000225345	46.6165	82.7914	78.6148	18.0098	15.5636	16.7196	37.3183	14.0491		-1.19924	0.000173602	0.000788956
		ENSG00000112499	13.8858	9.68835	8.4989	5.29701	3.11271	5.22486	0.746365	2.1614	SLC22A2	-1.19898	0.0128526	0.0367373
		ENSG00000050405	15154.3	15771.8	15789.9	15603.9	6611.4	6256.25	6220.95	8006.91	LIMA1	-1.19894	2.80549e-31	4.23891e-29
		ENSG00000116667	1799.2	1865.45	1785.83	1810.52	743.939	670.872	816.523	864.56	C1orf21	-1.19882	9.48842e-14	2.05196e-12
		ENSG00000273113	12.8939	18.496	18.0602	47.6731	10.3757	10.4497	3.73183	10.807		-1.19826	0.000728322	0.00289794
		ENSG00000124207	16164	17417	16415.6	14305.1	6750.44	6328.35	6894.17	7529.24	CSE1L	-1.19723	2.01162e-20	9.34251e-19
		ENSG00000266278	24.796	22.019	19.1225	13.7722	5.18786	7.3148	9.70275	7.5649	LOC101060542	-1.19706	0.00126262	0.00475588
		ENSG00000108175	7842.49	6876.97	7329.24	7553.54	3448.89	3863.26	1660.66	3598.73	ZMIZ1	-1.19704	1.38863e-09	1.62814e-08
		ENSG00000196275	40.6655	36.1111	26.5591	19.0692	11.4133	13.5846	17.9128	5.4035	GTF2IRD2	-1.19627	6.86017e-05	0.000341262
		ENSG00000232756	20.8287	31.7073	8.4989	15.891	5.18786	10.4497	8.21002	4.3228		-1.19533	0.00300232	0.0102926
		ENSG00000244482	20.8287	22.8997	24.4343	25.4256	10.3757	5.22486	8.95638	11.8877	LILRB3	-1.19491	0.000465137	0.00193322
		ENSG00000143374	1343.95	1329.95	1280.15	1245.86	594.528	589.364	507.528	570.61	TARS2	-1.19484	2.67791e-42	1.01154e-39
		ENSG00000259985	20.8287	19.3767	13.8107	19.0692	3.11271	6.26983	10.4491	6.4842		-1.19479	0.00251697	0.00878556
		ENSG00000131711	10.9103	18.496	20.1849	2.1188	4.15028	3.13492	5.97092	3.2421	MAP1B	-1.19477	0.00485369	0.0156883
		ENSG00000230255	5.95105	8.8076	10.6236	2.1188	1.03757	2.08994	2.2391	2.1614		-1.19404	0.0157803	0.0439042
		ENSG00000019505	1268.57	1011.11	1154.79	767.007	297.783	327.076	590.375	509.01	SYT13	-1.19392	1.22271e-05	7.20526e-05
		ENSG00000119547	11091.8	12170.3	13093.6	6213.39	3707.24	4710.73	4039.33	5254.37	ONECUT2	-1.19382	2.27656e-10	3.02971e-09
		ENSG00000164010	180.515	219.309	180.602	244.722	92.3438	99.2723	77.622	84.2946	ERMAP	-1.19381	7.77108e-16	2.22098e-14
		ENSG00000196730	10106.9	9164.3	9711.06	6297.09	4263.38	4415.01	2480.17	3753.27	DAPK1	-1.19347	9.16925e-11	1.29397e-09
		ENSG00000188760	189.442	155.014	134.92	99.5838	46.6907	60.6084	90.3102	39.9859	TMEM198	-1.19314	3.3291e-06	2.17124e-05
		ENSG00000218350	13.8858	11.4499	19.1225	48.7325	13.4884	4.17989	3.73183	10.807		-1.193	0.00205234	0.00732507
		ENSG00000135363	10.9103	7.92684	12.7484	22.2474	5.18786	0	0.746365	15.1298	LMO2	-1.19274	0.0105012	0.030805
		ENSG00000172367	118.029	110.976	103.049	127.128	71.5924	63.7433	13.4346	36.7438	PDZD3	-1.19089	0.000196315	0.000883847
		ENSG00000126861	21.8205	22.8997	42.4945	4.23761	1.03757	4.17989	15.6737	5.4035	OMG	-1.1908	0.0146154	0.0410717
		ENSG00000140511	82.3228	62.5339	73.303	39.1979	29.052	39.7089	20.1519	16.2105	HAPLN3	-1.19058	2.71218e-05	0.000148296
		ENSG00000176834	1338.99	1387.2	1307.77	1505.41	532.274	539.206	679.192	644.098	VSIG10	-1.1901	1.80616e-20	8.42281e-19
		ENSG00000126106	211.262	208.74	198.662	311.464	127.621	102.407	57.4701	104.828	TMEM53	-1.19009	4.88173e-09	5.26605e-08
		ENSG00000162344	1225.92	1021.68	1136.73	793.492	439.93	505.766	382.885	364.196	FGF19	-1.1895	2.16151e-05	0.000120959
		ENSG00000267141	32.7308	51.9648	50.9934	18.0098	8.30057	17.7645	17.9128	12.9684		-1.1877	0.000746702	0.00296379
		ENSG00000133250	216.221	170.867	129.608	336.89	60.1791	97.1824	65.6801	140.491	ZNF414	-1.18562	1.00287e-09	1.20386e-08
		ENSG00000245573	12.8939	15.8537	15.9354	4.23761	3.11271	6.26983	2.2391	5.4035	BDNF-AS	-1.1849	0.0029205	0.0100486
		ENSG00000261374	9.91841	9.68835	5.31181	7.41581	3.11271	1.04497	3.73183	2.1614		-1.184	0.0133358	0.0379321
		ENSG00000197217	2145.35	2217.75	2241.58	1775.56	970.129	962.419	792.64	931.564	ENTPD4	-1.1836	1.55972e-28	1.74135e-26
		ENSG00000012779	436.41	355.827	410.072	349.603	136.959	170.33	188.83	165.347	ALOX5	-1.18335	1.13526e-09	1.35134e-08
		ENSG00000138757	13377	13930.1	13591.9	12791.2	6656.02	6191.46	4986.46	5656.39	G3BP2	-1.18167	6.30316e-32	1.0504e-29
		ENSG00000116685	4107.21	3746.75	3610.97	3259.78	1614.46	1732.56	1188.96	1872.85	KIAA2013	-1.18134	6.78497e-16	1.96643e-14
		ENSG00000136068	48754	42786.4	45535	28768.1	16168.5	17602.6	15938.6	22094.9	FLNB	-1.18109	4.81925e-13	9.52254e-12
		ENSG00000102924	55.5431	56.3686	56.3052	56.1483	18.6763	32.3941	11.9418	32.421	CBLN1	-1.18106	1.55e-05	8.95239e-05
		ENSG00000233041	47.6084	52.8456	46.744	68.8611	25.9393	24.0344	15.6737	24.8561	PHGR1	-1.17926	3.21366e-06	2.09716e-05
		ENSG00000187796	1954.92	1715.72	1734.84	1724.71	676.496	798.359	950.123	691.648	CARD9	-1.17902	6.27681e-19	2.50013e-17
		ENSG00000151694	2373.48	2326.09	2413.69	2249.11	1130.95	1073.19	753.829	1142.3	ADAM17	-1.17885	1.77701e-20	8.30394e-19
		ENSG00000151348	5532.49	5077.58	5283.13	2736.44	2142.58	2363.73	2044.29	1455.7	EXT2	-1.17839	2.51268e-22	1.46019e-20
		ENSG00000134490	372.932	352.304	355.891	309.345	151.485	135.846	132.107	191.284	TMEM241	-1.17835	2.49074e-17	8.46327e-16
		ENSG00000125454	445.337	449.187	460.003	439.652	190.913	179.735	189.577	213.979	SLC25A19	-1.17833	4.11911e-11	6.13374e-10
		ENSG00000132640	2927.92	3075.61	2974.62	1706.7	1233.67	1153.65	1014.31	1143.38	BTBD3	-1.17778	5.3148e-17	1.76031e-15
		ENSG00000169429	929.355	745.123	830.767	286.039	233.454	211.084	306.756	365.277	CXCL8	-1.17768	4.33375e-05	0.000226827
		ENSG00000121797	134.89	133.875	158.292	148.316	67.4421	50.1587	73.1438	55.1157	CCRL2	-1.17766	2.90835e-11	4.40453e-10
		ENSG00000106003	4891.76	4594.04	4323.82	1700.34	2030.53	2250.87	660.533	1196.34	LFNG	-1.17759	1.66851e-05	9.57101e-05
		ENSG00000071967	57.5268	48.4418	50.9934	63.5641	9.33814	11.4947	29.1082	44.3087	CYBRD1	-1.17685	0.00015732	0.000721909
		ENSG00000141150	569.317	509.079	513.121	216.118	200.251	197.5	125.389	219.382		-1.17626	4.56034e-06	2.90406e-05
		ENSG00000231826	281.683	270.393	235.844	676.958	154.598	174.51	73.1438	104.828	LOC102723854	-1.17584	0.00420513	0.0138384
		ENSG00000094975	7724.46	7416.88	8110.08	3761.94	2448.67	2242.51	4131.88	2480.21	SUCO	-1.17574	9.07686e-10	1.09775e-08
		ENSG00000135324	558.407	619.174	603.422	493.681	268.731	272.738	199.279	256.126	MRAP2	-1.17537	1.24589e-21	6.55149e-20
		ENSG00000171823	835.13	634.147	695.847	544.533	260.43	298.862	317.205	302.596	FBXL14	-1.17412	3.42809e-17	1.15789e-15
		ENSG00000118094	17.8531	16.7344	19.1225	9.53462	3.11271	4.17989	9.70275	5.4035	TREH	-1.17392	0.00590614	0.0186233
		ENSG00000146021	324.332	300.339	314.459	366.553	156.673	148.386	128.375	138.33	KLHL3	-1.17337	6.58835e-18	2.40062e-16
		ENSG00000073756	528.651	598.916	583.237	483.087	269.769	276.918	185.845	218.302	PTGS2	-1.17309	1.51636e-11	2.41339e-10
		ENSG00000254027	9.91841	10.5691	5.31181	8.47522	1.03757	0	3.73183	5.4035		-1.17253	0.016174	0.0448346
		ENSG00000204128	681.395	731.03	661.852	255.316	312.309	322.896	116.433	186.961	C2orf72	-1.17244	4.6953e-06	2.97912e-05
		ENSG00000086200	2043.19	2264.43	2228.84	1668.56	710.736	678.187	1195.68	918.595	IPO11	-1.17235	1.21487e-10	1.68609e-09
		ENSG00000253368	11018.4	9499.87	9902.28	7690.2	3709.32	3855.95	3703.46	5514.81	TRNP1	-1.17206	2.13186e-14	5.07525e-13
		ENSG00000103154	18.845	28.1843	19.1225	4.23761	7.263	9.40475	7.46365	2.1614	NECAB2	-1.17179	0.00298678	0.0102464
		ENSG00000127125	1128.72	1286.79	1144.16	1367.69	555.101	478.597	515.738	631.129	PPCS	-1.17114	1.36706e-40	4.62434e-38
		ENSG00000257829	29.7552	20.2575	28.6838	24.3662	2.07514	10.4497	13.4346	12.9684		-1.17107	0.0026426	0.00917742
		ENSG00000121481	1651.42	1694.58	1631.79	1645.25	701.398	719.986	653.069	865.641	RNF2	-1.17085	1.70397e-41	5.94135e-39
		ENSG00000111269	1174.34	1172.29	1088.92	978.887	558.213	528.756	419.457	434.442	CREBL2	-1.17072	1.45198e-21	7.58239e-20
		ENSG00000246308	11.9021	15.8537	14.8731	6.35641	5.18786	0	8.21002	2.1614	LOC101928053	-1.1695	0.0103796	0.0304955
		ENSG00000267040	18.845	18.496	27.6214	15.891	6.22543	5.22486	11.1955	7.5649		-1.1691	0.00192877	0.00692986
		ENSG00000119514	2762.28	2672.22	2680.34	1871.96	974.279	892.406	1358.38	1062.33	GALNT12	-1.1691	1.29391e-09	1.52418e-08
		ENSG00000133687	114.062	104.81	89.2385	60.3859	47.7283	50.1587	38.811	23.7754	TMTC1	-1.16852	3.34184e-09	3.67846e-08
		ENSG00000107829	885.714	839.364	825.456	925.917	406.728	412.764	347.806	370.68	FBXW4	-1.16846	2.529e-31	3.84679e-29
		ENSG00000243896	17.8531	13.2114	18.0602	5.29701	1.03757	8.35978	7.46365	0	OR2A7	-1.16748	0.0155558	0.0433489
		ENSG00000131724	5212.13	5531.17	5336.25	4143.32	2438.29	2209.07	2158.49	2116.01	IL13RA1	-1.16743	8.97854e-46	4.84499e-43
		ENSG00000072071	1641.5	1360.77	1434.19	805.145	587.265	710.581	423.189	515.494	ADGRL1	-1.16709	6.79707e-12	1.1479e-10
		ENSG00000105974	1372.71	1143.23	1262.09	273.326	235.529	217.354	400.052	639.775	CAV1	-1.16459	0.00528166	0.0168953
		ENSG00000239345	5.95105	6.16532	12.7484	26.485	1.03757	3.13492	2.2391	11.8877		-1.16434	0.0049354	0.0159158
		ENSG00000250506	25.7879	18.496	22.3096	7.41581	10.3757	7.3148	4.47819	5.4035	CDK3	-1.16393	0.00324286	0.0110123
		ENSG00000206044	8.92657	8.8076	13.8107	6.35641	4.15028	2.08994	2.98546	3.2421		-1.16383	0.00762832	0.0233822
		ENSG00000235636	31.7389	34.3496	37.1827	67.8017	16.6011	4.17989	16.42	35.6631		-1.16375	3.33503e-05	0.000179051
		ENSG00000185022	1545.29	1229.54	1348.14	1334.85	452.381	457.698	871.754	573.852	MAFF	-1.16324	8.09056e-09	8.35374e-08
		ENSG00000177202	26.7797	27.3035	38.2451	20.1286	14.526	12.5397	8.21002	10.807	SPACA4	-1.1629	0.000246902	0.00108952
		ENSG00000002726	2550.02	2303.19	2245.83	1786.15	810.343	883.001	1283	891.578	AOC1	-1.16275	4.50291e-12	7.81423e-11
		ENSG00000173597	27.7716	10.5691	18.0602	4.23761	2.07514	5.22486	0.746365	10.807	SULT1B1	-1.16271	0.0148574	0.0416434
		ENSG00000215156	17.8531	21.1382	27.6214	1.0594	1.03757	6.26983	11.9418	1.0807	LOC646652	-1.16255	0.0130545	0.0372536
		ENSG00000010610	113.07	76.6261	105.174	54.0295	30.0896	31.3492	44.7819	39.9859	CD4	-1.16104	8.4845e-06	5.1553e-05
		ENSG00000163581	26.7797	36.1111	32.9332	21.188	9.33814	16.7196	11.9418	9.72631	SLC2A2	-1.16098	0.000139475	0.000646701
		ENSG00000146281	3539.88	3716.81	3579.1	3300.04	1686.05	1487	1285.24	1785.32	PM20D2	-1.15991	2.21984e-19	9.31674e-18
		ENSG00000148120	1256.66	1208.4	1171.79	805.145	511.523	442.023	509.021	487.396	C9orf3	-1.15958	1.19858e-21	6.3321e-20
		ENSG00000189337	396.737	325	399.448	359.137	183.65	141.071	164.2	165.347	KAZN	-1.15791	6.60636e-19	2.62678e-17
		ENSG00000270168	222.172	238.686	191.225	334.771	129.696	154.656	62.6947	73.4876		-1.15789	6.48602e-05	0.000325004
		ENSG00000130208	361.03	321.477	360.141	115.475	128.659	144.206	117.179	91.8595	APOC1	-1.15757	4.88154e-08	4.4414e-07
		ENSG00000125968	2782.11	2497.83	2347.82	1750.13	1052.1	1165.14	776.22	1070.97	ID1	-1.15714	2.35961e-13	4.90626e-12
		ENSG00000250591	5.95105	6.16532	9.56126	11.6534	2.07514	0	0.746365	8.6456		-1.15654	0.0107375	0.0314087
		ENSG00000248318	9.91841	18.496	16.9978	7.41581	3.11271	2.08994	8.21002	2.1614	LOC101927543	-1.15595	0.0169773	0.046713
		ENSG00000204983	74.3881	87.1952	86.0514	38.1385	25.9393	16.7196	23.8837	55.1157	PRSS1	-1.15543	0.000236854	0.00104825
		ENSG00000224818	46.6165	28.1843	47.8063	26.485	12.4509	12.5397	20.1519	15.1298		-1.1552	0.000355872	0.00151924
		ENSG00000112299	547.496	583.063	564.115	271.207	135.922	125.397	359.002	186.961	VNN1	-1.15489	2.21477e-05	0.000123574
		ENSG00000144355	46.6165	47.561	43.5569	13.7722	10.3757	10.4497	17.1664	20.5333	DLX1	-1.15458	0.00142617	0.00530229
		ENSG00000100346	33.7226	33.4689	24.4343	19.0692	16.6011	11.4947	5.97092	10.807	CACNA1I	-1.15336	0.000776943	0.00307145
		ENSG00000224276	46.6165	22.019	45.6816	24.3662	18.6763	18.8095	13.4346	6.4842	LOC107985210	-1.15173	0.000449866	0.0018743
		ENSG00000148346	5203.2	4961.32	4699.89	3895.42	1762.83	1903.94	2615.26	2009.02	LCN2	-1.15085	3.42435e-16	1.02387e-14
		ENSG00000197046	51.5757	51.0841	31.8709	93.2274	26.9769	34.4841	5.22456	19.4526	SIGLEC15	-1.15077	0.00360662	0.0121025
		ENSG00000234290	52.5676	52.8456	60.5547	33.9009	20.7514	19.8545	27.6155	16.2105	LOC105379175	-1.14962	4.61037e-06	2.93345e-05
		ENSG00000147852	672.468	674.662	582.175	289.217	194.026	177.645	353.777	195.607	VLDLR	-1.1491	3.42076e-07	2.68915e-06
		ENSG00000106327	152.744	128.591	125.359	99.5838	49.8034	44.9338	52.9919	72.4069	TFR2	-1.14794	4.53171e-07	3.48749e-06
		ENSG00000104611	3417.89	3514.23	3567.41	2459.93	1157.93	1177.68	1608.42	1815.58	SH2D4A	-1.1462	6.42456e-12	1.0915e-10
		ENSG00000074660	52.5676	45.7995	61.617	34.9603	34.2398	17.7645	13.4346	17.2912	SCARF1	-1.14611	3.60865e-05	0.000191672
		ENSG00000198580	15.8695	19.3767	24.4343	10.594	1.03757	8.35978	11.9418	3.2421		-1.14571	0.0115009	0.0333362
		ENSG00000243629	17.8531	24.6613	20.1849	8.47522	2.07514	4.17989	8.21002	11.8877	LINC00880	-1.14478	0.00764467	0.0234289
		ENSG00000228834	5.95105	10.5691	10.6236	20.1286	2.07514	2.08994	4.47819	7.5649		-1.14407	0.00901282	0.0270415
		ENSG00000249388	14.8776	13.2114	9.56126	10.594	4.15028	3.13492	3.73183	6.4842	LOC100240734	-1.14384	0.0085099	0.0256884
		ENSG00000174206	299.536	314.431	275.152	323.118	139.035	127.487	157.483	116.716	C12orf66	-1.14376	6.80653e-13	1.31288e-11
		ENSG00000172977	1310.22	1278.86	1266.34	1265.99	537.462	579.959	542.607	655.985	KAT5	-1.14282	6.93917e-42	2.49634e-39
		ENSG00000233270	18.845	16.7344	25.4967	37.0791	16.6011	8.35978	6.71729	6.4842		-1.14258	0.0013922	0.00519045
		ENSG00000075142	2656.15	2691.6	2619.79	2093.38	1238.86	1093.04	979.231	1195.25	SRI	-1.14193	2.66845e-25	2.1947e-23
		ENSG00000130202	16358.4	14234	14136.9	15816.9	6678.85	6955.33	5873.89	7811.3	NECTIN2	-1.14135	6.63791e-31	9.52162e-29
		ENSG00000254862	8.92657	8.8076	18.0602	7.41581	7.263	1.04497	5.22456	1.0807	LOC105376671	-1.13894	0.0139384	0.0394186
		ENSG00000213963	17.8531	22.019	22.3096	14.8316	10.3757	2.08994	7.46365	9.72631	LOC100130691	-1.13891	0.00358551	0.0120388
		ENSG00000136237	1318.16	1443.56	1370.45	753.235	612.167	547.565	560.52	438.764	RAPGEF5	-1.138	4.54873e-17	1.5183e-15
		ENSG00000267742	12.8939	19.3767	19.1225	41.3167	4.15028	11.4947	1.49273	22.6947		-1.13716	0.00219553	0.00778222
		ENSG00000147234	125.964	103.93	93.4879	43.4355	18.6763	7.3148	91.8029	18.3719	FRMPD3	-1.13616	0.0072366	0.0223386
		ENSG00000149600	1325.1	1285.03	1224.9	973.59	571.702	466.057	579.179	541.431	COMMD7	-1.13595	1.23849e-24	9.28324e-23
		ENSG00000260588	16.8613	13.2114	13.8107	5.29701	2.07514	3.13492	4.47819	7.5649		-1.1346	0.00950599	0.0282995
		ENSG00000156642	6099.82	5920.47	5629.46	4073.4	2741.26	2591.53	1721.12	2598	NPTN	-1.13437	3.68903e-12	6.47122e-11
		ENSG00000270010	13.8858	14.0922	14.8731	11.6534	4.15028	5.22486	2.2391	9.72631		-1.13396	0.00512568	0.0164591
		ENSG00000104904	17748	17351	15985.4	10376.8	7504.75	7893.72	4773.75	6811.66	OAZ1	-1.13287	6.38247e-12	1.08516e-10
		ENSG00000272636	19.8368	15.8537	5.31181	6.35641	7.263	3.13492	0.746365	4.3228	DOC2B	-1.13211	0.0151676	0.0424342
		ENSG00000008513	23684.2	20468	21907	19908.3	9075.64	8858.23	10105.8	11014.5	ST3GAL1	-1.13109	2.40784e-33	4.5476e-31
		ENSG00000179387	856.951	869.31	1012.43	584.79	470.02	407.539	279.887	320.968	ELMOD2	-1.13103	3.77589e-13	7.62038e-12
		ENSG00000128050	19947.9	21429.8	20384.6	17844.6	9483.4	8877.04	8643.65	9013.04	PAICS	-1.13086	4.05732e-32	6.86232e-30
		ENSG00000269988	22.8124	27.3035	13.8107	9.53462	2.07514	13.5846	5.22456	6.4842		-1.13063	0.00726183	0.0223982
		ENSG00000101311	12778.9	13998.8	12753.7	13692.8	6514.91	6228.03	3621.36	7683.78	FERMT1	-1.13027	5.44168e-12	9.31699e-11
		ENSG00000073598	15.8695	26.4228	27.6214	2.1188	5.18786	6.26983	6.71729	6.4842	FNDC8	-1.1298	0.010113	0.0298205
		ENSG00000218073	21.8205	22.8997	8.4989	12.7128	2.07514	7.3148	2.98546	11.8877		-1.1298	0.0136595	0.0387264
		ENSG00000165730	67.4452	73.9838	62.6794	46.6137	24.9017	20.8994	41.7964	15.1298	STOX1	-1.12964	0.000736787	0.00292906
		ENSG00000221955	1279.48	1399.53	1274.84	1243.74	601.791	629.073	485.137	643.017	SLC12A8	-1.12917	1.2411e-24	9.28324e-23
		ENSG00000083937	1930.12	2077.71	2022.74	1595.46	978.43	936.295	643.367	878.61	CHMP2B	-1.12775	9.09386e-17	2.91106e-15
		ENSG00000137819	6828.83	6515.86	6740.69	4657.13	2714.29	2696.03	2673.48	2926.54	PAQR5	-1.12768	3.68528e-16	1.09467e-14
		ENSG00000166446	82.3228	84.5529	93.4879	31.7821	24.9017	40.7539	39.5573	18.3719	CDYL2	-1.12732	2.01236e-05	0.000113481
		ENSG00000126562	782.563	838.483	721.344	419.523	361.075	375.145	170.171	280.982	WNK4	-1.12729	1.83066e-06	1.2531e-05
		ENSG00000128564	50.5839	29.9458	31.8709	49.7919	13.4884	7.3148	25.3764	18.3719	VGF	-1.12705	0.00145622	0.00539984
		ENSG00000215807	19.8368	19.3767	10.6236	20.1286	4.15028	1.04497	7.46365	16.2105		-1.12694	0.00596823	0.0187945
		ENSG00000268812	19.8368	19.3767	26.5591	23.3068	6.22543	8.35978	11.1955	9.72631	MGC20647	-1.12686	0.00235286	0.00828675
		ENSG00000152056	2413.15	2309.35	2480.62	2049.94	991.918	949.879	885.935	1424.36	AP1S3	-1.12535	1.692e-12	3.11768e-11
		ENSG00000128039	142.825	169.987	173.165	179.039	58.104	75.238	77.622	88.6174	SRD5A3	-1.12391	3.63501e-13	7.34914e-12
		ENSG00000134779	2951.72	2938.21	2966.12	3986.53	1211.88	1196.49	1630.81	1678.33	TPGS2	-1.12384	5.5417e-09	5.91323e-08
		ENSG00000101849	1593.89	1435.64	1579.73	1322.13	631.881	713.716	570.223	793.234	TBL1X	-1.12339	8.04443e-20	3.51289e-18
		ENSG00000226044	31.7389	21.1382	23.372	6.35641	6.22543	10.4497	8.21002	6.4842		-1.12312	0.00580821	0.0183723
		ENSG00000236305	34.7144	29.9458	40.3698	36.0197	15.5636	22.9894	12.6882	9.72631		-1.12282	9.10953e-05	0.000441339
		ENSG00000159128	948.2	908.944	816.957	978.887	404.653	364.695	326.908	610.596	IFNGR2	-1.12148	8.23842e-16	2.34273e-14
		ENSG00000150867	1351.88	1233.94	1418.25	1076.35	505.297	489.047	582.165	731.634	PIP4K2A	-1.12126	2.43323e-12	4.38369e-11
		ENSG00000168476	1750.6	1572.16	1434.19	1241.62	734.6	770.144	557.535	645.178	REEP4	-1.12111	8.59376e-15	2.1641e-13
		ENSG00000152784	545.513	525.813	482.313	370.791	177.425	179.735	197.787	322.049	PRDM8	-1.12096	9.2501e-09	9.46048e-08
		ENSG00000183935	31.7389	11.4499	16.9978	6.35641	3.11271	8.35978	6.71729	5.4035	HTR7P1	-1.12093	0.0104196	0.0306051
		ENSG00000184163	39.6737	39.6342	35.058	25.4256	21.789	22.9894	8.21002	7.5649	FAM132A	-1.12042	0.000421673	0.00176618
		ENSG00000176022	1356.84	1277.98	1168.6	1495.88	590.378	639.523	439.609	761.894	B3GALT6	-1.12031	2.20323e-18	8.39228e-17
		ENSG00000135111	2957.67	2688.08	2724.96	3197.28	1480.61	1518.34	700.09	1487.04	TBX3	-1.11929	1.3098e-08	1.30085e-07
		ENSG00000232093	14.8776	9.68835	20.1849	16.9504	6.22543	7.3148	5.22456	5.4035		-1.11901	0.00489927	0.0158173
		ENSG00000152213	44.6329	33.4689	48.8687	26.485	14.526	13.5846	20.1519	16.2105	ARL11	-1.11836	0.000596723	0.00241934
		ENSG00000169105	711.15	608.605	666.101	400.454	247.98	249.748	283.619	279.901	CHST14	-1.11827	5.029e-13	9.87671e-12
		ENSG00000173706	91.2494	66.057	82.8643	61.4453	19.7139	16.7196	33.5864	64.842	HEG1	-1.11772	0.000321043	0.0013841
		ENSG00000163069	1100.94	1069.24	1204.72	1010.67	505.297	504.721	452.297	543.592	SGCB	-1.11757	1.42559e-21	7.46181e-20
		ENSG00000059377	715.118	718.7	677.787	803.027	383.901	365.74	166.439	393.375	TBXAS1	-1.1175	3.65177e-08	3.38364e-07
		ENSG00000198648	18183.4	18056.5	18306.6	11800.7	7608.51	6872.78	7449.47	8078.24	STK39	-1.11702	4.83067e-15	1.2636e-13
		ENSG00000150907	2621.44	2329.61	2570.92	1700.34	829.019	954.059	1117.31	1224.43	FOXO1	-1.11643	7.35225e-11	1.0513e-09
		ENSG00000102034	6721.71	5822.7	6157.45	4414.53	2283.69	2402.39	2697.36	3103.77	ELF4	-1.11525	1.12538e-14	2.79361e-13
		ENSG00000254531	92.2412	61.6532	65.8665	75.2175	33.2023	31.3492	26.8691	41.0666	FLJ20021	-1.11513	3.89697e-07	3.033e-06
		ENSG00000158856	589.154	579.54	592.798	1085.89	318.534	337.526	266.452	336.098	DMTN	-1.11492	2.45554e-10	3.24125e-09
		ENSG00000092200	16.8613	18.496	24.4343	21.188	6.22543	9.40475	12.6882	4.3228	RPGRIP1	-1.11417	0.00237928	0.00836678
		ENSG00000146411	310.446	292.412	327.208	275.445	149.41	142.116	95.5347	162.105	SLC2A12	-1.11347	5.64251e-10	7.05749e-09
		ENSG00000180198	8552.65	8550.41	8123.89	7248.43	3760.16	3726.37	3419.84	3965.09	RCC1	-1.11314	4.77532e-26	4.24423e-24
		ENSG00000268041	20.8287	22.019	13.8107	22.2474	8.30057	8.35978	8.21002	7.5649		-1.11263	0.00131455	0.00492935
		ENSG00000230055	4709.26	4353.59	4107.09	3642.22	1627.95	1740.92	1927.11	2408.88		-1.11262	2.08073e-16	6.36846e-15
		ENSG00000149798	2553	2097.97	2158.72	2246.99	833.17	873.597	1122.53	1342.23	CDC42EP2	-1.11204	6.11978e-14	1.35979e-12
		ENSG00000133424	1205.09	1067.48	1174.97	816.799	547.838	564.285	331.386	471.185	LARGE1	-1.1118	2.17115e-09	2.48771e-08
		ENSG00000197147	2850.55	3073.85	2881.13	1734.24	1118.5	1145.29	1219.56	1222.27	LRRC8B	-1.11115	1.54865e-16	4.85457e-15
		ENSG00000113649	5233.95	5515.32	5441.42	4835.11	2388.49	2262.36	2127.89	2884.39	TCERG1	-1.11099	1.51655e-24	1.12692e-22
		ENSG00000260269	24.796	19.3767	13.8107	5.29701	1.03757	5.22486	5.22456	11.8877		-1.11062	0.0162388	0.0449922
		ENSG00000187492	61.4942	51.9648	62.6794	26.485	28.0144	31.3492	20.1519	8.6456	CDHR4	-1.11052	0.000156046	0.000716788
		ENSG00000092969	523.692	487.941	507.809	548.77	166.011	177.645	276.155	333.936	TGFB2	-1.11031	1.29498e-11	2.08152e-10
		ENSG00000174514	123.98	101.287	94.5503	50.8513	46.6907	54.3385	35.8255	28.0982	MFSD4A	-1.11023	2.30943e-07	1.86665e-06
		ENSG00000225946	364.998	357.588	308.085	134.544	129.696	175.555	118.672	89.6981		-1.10854	3.41769e-12	6.0279e-11
		ENSG00000196083	595.105	525.813	568.364	740.522	247.98	241.389	306.756	312.322	IL1RAP	-1.10811	3.33337e-23	2.14016e-21
		ENSG00000091436	3331.6	3578.53	3612.03	4260.91	1791.89	1525.66	1557.66	1952.83	ZAK	-1.10647	5.32387e-37	1.3869e-34
		ENSG00000108352	1259.64	1094.78	1093.17	810.442	555.101	612.354	393.334	373.922	RAPGEFL1	-1.10489	3.28379e-10	4.25279e-09
		ENSG00000130958	1665.3	1724.53	1572.3	2335.98	850.808	770.144	656.055	1105.56	SLC35D2	-1.10314	1.08679e-26	1.01362e-24
		ENSG00000135185	999.776	1066.6	973.124	654.71	509.447	437.843	431.399	322.049	TMEM243	-1.10298	8.44446e-25	6.44395e-23
		ENSG00000163291	861.91	804.133	956.126	657.889	388.052	394.999	417.218	312.322	PAQR3	-1.1023	4.01169e-26	3.60797e-24
		ENSG00000109511	10312.2	11156.6	11018.8	2800	3771.57	3327.19	3261.62	4275.25	ANXA10	-1.10179	4.17682e-05	0.000219027
		ENSG00000180801	2113.61	2400.07	2168.28	1701.4	939.002	899.721	869.515	1174.72	ARSJ	-1.10083	1.05084e-15	2.95486e-14
		ENSG00000102471	4786.63	4877.65	4986.73	2881.57	2144.66	2096.21	1843.52	1877.18	NDFIP2	-1.09943	9.82327e-17	3.1357e-15
		ENSG00000109084	3592.45	3829.54	3482.42	4532.12	1818.86	1710.62	1333.01	2349.44	TMEM97	-1.09868	4.72878e-25	3.71681e-23
		ENSG00000039139	213.246	214.025	197.599	170.564	88.1936	85.6877	88.8174	103.747	DNAH5	-1.09808	9.69668e-14	2.09301e-12
		ENSG00000117859	3469.46	3508.07	3617.34	2895.35	1642.48	1629.11	1277.03	1701.02	OSBPL9	-1.09789	7.26541e-21	3.54878e-19
		ENSG00000122126	3269.11	3554.75	3445.24	2699.36	1657	1602.99	1285.99	1454.62	OCRL	-1.09741	6.71669e-27	6.4503e-25
		ENSG00000174840	1188.23	1187.26	1228.09	1031.86	560.288	548.61	507.528	528.463	PDE12	-1.09725	2.41052e-21	1.23323e-19
		ENSG00000172954	1859.7	1960.57	1942	1409	914.1	900.766	576.94	892.659	LCLAT1	-1.09692	1.67705e-11	2.64869e-10
		ENSG00000001461	2302.06	2305.83	2270.27	1590.16	844.583	810.898	1170.3	1008.29	NIPAL3	-1.09674	4.66554e-12	8.07791e-11
		ENSG00000255474	9.91841	14.9729	13.8107	30.7227	6.22543	8.35978	3.73183	9.72631	LOC101929549	-1.09643	0.0019206	0.00690488
		ENSG00000144935	17.8531	15.8537	23.372	27.5445	5.18786	5.22486	11.1955	12.9684	TRPC1	-1.09558	0.00321025	0.0109179
		ENSG00000234737	22.8124	11.4499	15.9354	133.485	5.18786	3.13492	6.71729	73.4876		-1.09524	0.00198315	0.00710611
		ENSG00000196081	14.8776	21.1382	22.3096	26.485	8.30057	6.26983	6.71729	14.0491		-1.09455	0.00305141	0.0104372
		ENSG00000215089	58.5186	44.038	45.6816	92.168	21.789	15.6746	23.1373	49.7122		-1.0944	1.69819e-05	9.71667e-05
		ENSG00000162496	2823.77	2646.68	2527.36	2494.89	1223.3	1196.49	926.239	1554.05	DHRS3	-1.09348	4.59317e-14	1.03788e-12
		ENSG00000255277	4.95921	7.04608	11.686	7.41581	3.11271	3.13492	2.2391	2.1614	ABCC6P2	-1.09345	0.0148441	0.0416163
		ENSG00000196878	12213.5	8817.28	9966.02	5858.49	3737.33	3942.68	5202.16	3780.29	LAMB3	-1.09306	4.62121e-11	6.81426e-10
		ENSG00000250742	84.3065	73.103	96.675	48.7325	24.9017	48.0687	31.3473	30.2596	LOC400043	-1.09287	1.89975e-06	1.29453e-05
		ENSG00000227404	7.93473	8.8076	9.56126	52.9701	0	7.3148	1.49273	20.5333		-1.09258	0.0160556	0.0445281
		ENSG00000174839	666.517	769.784	701.159	1014.91	416.066	406.494	205.997	406.343	DENND6A	-1.09195	5.13905e-09	5.51563e-08
		ENSG00000130402	88862	73904.5	75721	67753	30281.5	31574.9	34412.7	48115	ACTN4	-1.09145	3.27495e-14	7.52773e-13
		ENSG00000144677	3404.99	3286.99	3445.24	2548.92	1100.86	1121.25	1806.2	1640.5	CTDSPL	-1.09097	8.09613e-07	5.93821e-06
		ENSG00000186889	43.641	51.9648	60.5547	30.7227	24.9017	20.8994	18.6591	18.3719	TMEM17	-1.09048	1.74587e-05	9.96687e-05
		ENSG00000209042	13.8858	21.1382	21.2473	2.1188	4.15028	9.40475	5.22456	3.2421	SNORD12C	-1.08978	0.00796583	0.0242462
		ENSG00000204252	60.5023	58.1301	61.617	59.3265	16.6011	21.9444	30.601	36.7438	HLA-DOA	-1.08963	0.000516764	0.00212635
		ENSG00000141696	1196.16	1063.96	1045.36	1191.83	504.26	506.811	453.79	653.824	P3H4	-1.08948	9.3954e-30	1.15676e-27
		ENSG00000236526	5.95105	14.9729	33.9956	14.8316	4.15028	10.4497	4.47819	7.5649		-1.08915	0.0101583	0.0299191
		ENSG00000170647	277.716	251.897	271.965	153.613	61.2167	103.452	155.244	100.505	TMEM133	-1.08911	1.63273e-06	1.12577e-05
		ENSG00000272091	169.605	167.344	171.04	292.395	107.907	83.5978	65.6801	98.3438		-1.08759	5.72435e-07	4.31736e-06
		ENSG00000130962	906.543	880.76	999.683	631.404	283.257	263.333	562.759	420.393	PRRG1	-1.08664	5.43358e-07	4.11999e-06
		ENSG00000168490	28.7634	21.1382	22.3096	8.47522	6.22543	10.4497	5.22456	10.807	PHYHIP	-1.08539	0.00743308	0.0228611
		ENSG00000261123	69.4289	80.1491	76.4901	114.415	32.1647	29.2592	34.3328	62.6806		-1.084	1.83954e-08	1.78626e-07
		ENSG00000186567	393.761	320.596	400.511	167.386	162.899	128.532	170.918	113.474	CEACAM19	-1.08375	3.75578e-09	4.10222e-08
		ENSG00000166920	11.9021	10.5691	11.686	11.6534	4.15028	3.13492	5.97092	4.3228	C15orf48	-1.08245	0.00904245	0.0271154
		ENSG00000260948	31.7389	45.7995	43.5569	19.0692	10.3757	10.4497	16.42	20.5333		-1.08156	0.00167034	0.00610097
		ENSG00000179862	215.23	150.61	155.105	234.128	71.5924	93.0025	85.0856	96.1824	CITED4	-1.08154	1.8042e-09	2.09158e-08
		ENSG00000153989	4131.02	4500.68	4450.24	3518.27	2234.93	2037.7	1487.51	1966.88	NUS1	-1.08148	9.95201e-18	3.54642e-16
		ENSG00000173926	441.369	428.93	433.444	307.227	172.237	194.365	177.635	205.333	MARCH3	-1.08146	1.4631e-14	3.55791e-13
		ENSG00000251322	48.6002	29.0651	16.9978	37.0791	5.18786	14.6296	5.22456	35.6631	SHANK3	-1.08103	0.00783989	0.0239336
		ENSG00000083290	109.103	103.049	103.049	56.1483	35.2774	51.2036	34.3328	44.3087	ULK2	-1.08099	0.000216873	0.000967561
		ENSG00000132142	22152.8	23859.8	22718.6	24662.9	9740.72	10881.3	9902.77	13727.1		-1.08073	7.66694e-31	1.07261e-28
		ENSG00000175294	64.4697	58.1301	53.1181	31.7821	20.7514	10.4497	35.0792	20.5333	CATSPER1	-1.08048	0.00199057	0.0071293
		ENSG00000272144	18.845	22.8997	20.1849	20.1286	4.15028	5.22486	11.9418	11.8877		-1.08044	0.00459869	0.0149692
		ENSG00000107679	4403.78	4556.17	4627.65	3218.46	1973.46	1986.49	1780.08	2057.65	PLEKHA1	-1.07962	1.85834e-16	5.71471e-15
		ENSG00000169991	6963.72	6298.31	6516.53	5935.83	2729.85	2590.49	2610.04	4324.96	IFFO2	-1.07934	1.78679e-10	2.41622e-09
		ENSG00000180061	68.4371	53.7263	63.7418	63.5641	21.789	31.3492	30.601	29.1789	TMEM150B	-1.07815	3.93047e-07	3.05711e-06
		ENSG00000111321	5799.3	5338.28	5087.65	5787.51	2437.25	2503.75	2550.33	2912.49	LTBR	-1.07791	6.37216e-48	4.37632e-45
		ENSG00000256436	19.8368	18.496	16.9978	9.53462	10.3757	5.22486	4.47819	6.4842	TAS2R31	-1.07758	0.00655189	0.0204309
		ENSG00000148143	121.996	125.949	77.5525	93.2274	10.3757	22.9894	75.3829	63.7613	ZNF462	-1.07681	0.00716351	0.0221371
		ENSG00000205084	248.952	228.117	240.094	67.8017	104.795	96.1374	96.2811	47.5508	TMEM231	-1.07645	5.53335e-07	4.18584e-06
		ENSG00000204653	12.8939	12.3306	16.9978	11.6534	2.07514	5.22486	8.95638	4.3228	ASPDH	-1.07623	0.00470649	0.0152666
		ENSG00000078401	2232.63	2282.93	2291.52	2351.87	1290.74	1306.21	694.119	871.045	EDN1	-1.07534	2.52606e-05	0.000139059
		ENSG00000254837	346.153	395.461	404.76	390.919	169.124	189.14	174.649	188.042		-1.07502	1.11493e-15	3.11961e-14
		ENSG00000049860	5352.97	5137.47	5207.7	5414.6	2416.5	2185.04	2746.62	2602.33	HEXB	-1.07409	2.98407e-24	2.16073e-22
		ENSG00000124813	405.663	327.643	356.954	785.017	181.575	175.555	223.163	238.835	RUNX2	-1.07392	3.00435e-06	1.96908e-05
		ENSG00000147676	32654.4	32729.9	32312.8	35414.7	15562.5	14418.5	14628.8	18665.9	MAL2	-1.07296	2.09219e-49	1.52959e-46
		ENSG00000073605	513.774	539.906	624.669	674.839	289.482	287.367	215.699	315.565	GSDMB	-1.07269	1.6868e-16	5.22976e-15
		ENSG00000074695	6118.67	6702.58	6508.03	3244.95	2732.96	2782.76	2035.34	2570.99	LMAN1	-1.07249	1.26392e-09	1.48963e-08
		ENSG00000248409	38.6818	37.8727	31.8709	48.7325	34.2398	17.7645	4.47819	9.72631		-1.0712	0.00747445	0.0229696
		ENSG00000102870	1607.77	1452.37	1459.69	1921.76	826.944	808.808	498.572	889.417	ZNF629	-1.07114	5.69861e-14	1.2687e-12
		ENSG00000226887	542.537	565.448	508.872	480.968	168.087	237.209	286.604	286.386	ERVMER34-1	-1.07111	1.22814e-09	1.45128e-08
		ENSG00000141384	840.09	794.445	857.327	724.631	347.586	360.515	430.653	370.68	TAF4B	-1.0706	1.23153e-17	4.34079e-16
		ENSG00000241878	2093.78	1986.11	1824.08	1430.19	935.889	912.261	807.567	794.315	PISD	-1.0698	2.0409e-28	2.24539e-26
		ENSG00000196535	8131.12	7067.21	7599.08	7828.98	3195.72	3478.71	3375.81	4535.7	MYO18A	-1.06945	1.68481e-16	5.22976e-15
		ENSG00000106070	3024.12	2566.53	2680.34	943.927	762.615	733.57	1664.39	850.511	GRB10	-1.0687	0.000106545	0.000507831
		ENSG00000123329	22.8124	29.9458	19.1225	48.7325	8.30057	5.22486	10.4491	33.5017	ARHGAP9	-1.06827	0.0012609	0.00475098
		ENSG00000180398	8332.46	7861.66	8218.44	5978.21	3564.06	3472.44	3605.69	3631.15	MCFD2	-1.06776	5.68808e-16	1.66556e-14
		ENSG00000184254	1571.08	963.551	1282.27	388.801	274.956	267.513	824.733	303.677	ALDH1A3	-1.06774	0.00666972	0.0207645
		ENSG00000255468	48.6002	81.9106	54.1805	61.4453	29.052	34.4841	17.1664	31.3403	LOC102724064	-1.06758	7.66255e-05	0.000377531
		ENSG00000154743	1141.61	1246.27	1293.96	676.958	568.589	532.936	414.233	478.75	TSEN2	-1.06737	6.93671e-13	1.33458e-11
		ENSG00000111863	27.7716	22.019	31.8709	3.17821	11.4133	3.13492	8.95638	7.5649	ADTRP	-1.06737	0.0138494	0.0391865
		ENSG00000163932	2188.99	2081.23	1974.93	2475.82	1183.87	1101.4	847.124	984.518	PRKCD	-1.06719	1.6105e-20	7.62011e-19
		ENSG00000172819	3863.22	3410.3	3493.05	3091.33	1665.3	1809.89	1629.31	1484.88	RARG	-1.06696	6.52234e-46	3.60542e-43
		ENSG00000131910	1534.38	1581.84	1378.95	705.562	725.262	733.57	247.793	580.336	NR0B2	-1.06689	5.65475e-05	0.000287934
		ENSG00000263718	47.6084	61.6532	32.9332	33.9009	10.3757	26.1243	17.1664	22.6947	LOC105371907	-1.06686	0.0012492	0.00471159
		ENSG00000160188	372.932	403.388	402.635	386.682	209.589	218.399	79.1147	216.14	RSPH1	-1.06654	8.75166e-06	5.29633e-05
		ENSG00000064651	28440.1	31941.6	30034.1	29075.3	15460.8	15078.9	8480.2	17125.9	SLC12A2	-1.0664	2.36989e-10	3.14101e-09
		ENSG00000241416	11.9021	8.8076	16.9978	15.891	6.22543	2.08994	5.22456	7.5649		-1.06634	0.0107006	0.0313169
		ENSG00000183091	174.564	258.063	241.156	174.801	65.367	91.9575	123.15	96.1824	NEB	-1.06629	0.000119199	0.000562349
		ENSG00000119698	46.6165	53.7263	49.931	15.891	17.6387	10.4497	23.1373	16.2105	PPP4R4	-1.06602	0.00583242	0.0184283
		ENSG00000084636	1992.61	1441.8	1761.4	925.917	581.04	643.703	1102.38	486.315	COL16A1	-1.06601	9.10867e-08	7.90046e-07
		ENSG00000120156	98.1923	123.306	103.049	65.6829	69.5173	59.5634	7.46365	28.0982	TEK	-1.06496	0.00375463	0.0125342
		ENSG00000257298	15.8695	9.68835	28.6838	13.7722	5.18786	7.3148	5.97092	8.6456		-1.06452	0.00748639	0.0229938
		ENSG00000063177	30267	28446.8	27559.8	27430	14588.3	15771.8	9634.08	13318.6	RPL18	-1.06386	1.50763e-10	2.05836e-09
		ENSG00000261613	45.6247	36.1111	36.1203	16.9504	12.4509	19.8545	12.6882	11.8877		-1.06375	0.00309166	0.0105606
		ENSG00000145569	1145.58	1402.17	1253.59	1089.07	658.858	566.375	436.624	613.838	FAM105A	-1.06228	4.54756e-08	4.16091e-07
		ENSG00000204991	1153.51	1026.08	1028.37	1442.91	567.551	592.499	447.073	578.175	SPIRE2	-1.06227	1.0755e-15	3.02046e-14
		ENSG00000179950	10850.7	10119	9309.48	7795.08	4702.27	4887.33	3607.18	4741.03	PUF60	-1.06189	1.07589e-16	3.41511e-15
		ENSG00000116209	5140.71	5216.74	5043.03	3876.35	2821.16	2566.45	1959.21	1797.21	TMEM59	-1.06168	2.74574e-16	8.30833e-15
		ENSG00000176125	42.6492	29.9458	26.5591	34.9603	10.3757	18.8095	15.6737	14.0491	UFSP1	-1.06119	0.000589553	0.00239307
		ENSG00000165480	1343.95	1488.48	1426.75	1404.77	670.271	649.973	647.098	700.294	SKA3	-1.06096	2.64263e-11	4.02503e-10
		ENSG00000198270	157.703	156.775	168.916	61.4453	59.1416	59.5634	73.8901	51.8736	TMEM116	-1.06089	8.48014e-07	6.18782e-06
		ENSG00000115648	4669.59	4155.42	4298.32	3590.31	2038.83	1966.64	1662.15	2224.08	MLPH	-1.06081	3.53795e-11	5.29968e-10
		ENSG00000107731	43.641	28.1843	43.5569	12.7128	9.33814	10.4497	21.6446	8.6456	UNC5B	-1.06077	0.00783946	0.0239336
		ENSG00000165868	55.5431	66.057	58.4299	22.2474	29.052	24.0344	17.9128	14.0491	HSPA12A	-1.05919	0.00424826	0.013958
		ENSG00000119048	1807.13	1824.05	1777.33	1615.59	903.725	803.583	738.155	913.192	UBE2B	-1.05901	8.26396e-25	6.32752e-23
		ENSG00000166188	190.434	140.041	151.918	230.95	73.6676	94.0475	62.6947	102.667	ZNF319	-1.05893	7.56507e-08	6.66361e-07
		ENSG00000159263	648.664	545.19	611.921	808.324	293.633	317.671	238.837	390.133	SIM2	-1.05889	3.98599e-13	8.00164e-12
		ENSG00000250295	18.845	32.5881	18.0602	34.9603	11.4133	14.6296	11.1955	7.5649	RDH10-AS1	-1.05873	0.00101625	0.00390775
		ENSG00000182700	202.336	242.209	240.094	148.316	80.9306	84.6427	117.926	100.505	IGIP	-1.05863	1.04159e-09	1.24836e-08
		ENSG00000264098	23.8042	32.5881	41.4321	33.9009	20.7514	7.3148	11.1955	16.2105		-1.05804	0.00570037	0.0180766
		ENSG00000095539	2360.58	2239.77	2308.51	2415.44	1250.27	1262.33	689.641	1201.74	SEMA4G	-1.05711	1.25418e-10	1.73639e-09
		ENSG00000075420	8035.9	7708.41	8245	6699.66	3157.33	3101.48	3322.07	5325.69	FNDC3B	-1.05694	3.39014e-11	5.09173e-10
		ENSG00000167553	12319.7	12102.5	11227	9624.67	5396.41	5294.87	5212.61	5494.28	TUBA1C	-1.05682	2.72752e-14	6.39261e-13
		ENSG00000058085	6357.7	4514.77	5535.97	1285.05	1226.41	1248.74	2574.21	2124.66	LAMC2	-1.05647	0.00516081	0.016555
		ENSG00000172508	210.27	139.16	212.473	82.6334	93.3814	89.8676	66.4265	47.5508	CARNS1	-1.05622	1.69625e-07	1.39897e-06
		ENSG00000165215	3039.99	2151.7	1977.06	5677.34	1078.04	1382.5	1035.21	2461.84	CLDN3	-1.05606	1.63856e-11	2.59151e-10
		ENSG00000265415	193.409	262.466	250.718	155.732	122.433	115.992	113.447	61.5999		-1.05577	1.04258e-11	1.70729e-10
		ENSG00000085831	376.9	293.293	338.894	416.345	167.049	183.915	149.273	171.831	TTC39A	-1.05566	2.91137e-10	3.80966e-09
		ENSG00000064225	136.874	133.875	174.227	48.7325	57.0664	41.7989	72.3974	44.3087	ST3GAL6	-1.05556	3.433e-05	0.000183851
		ENSG00000269165	44.6329	38.7534	33.9956	15.891	17.6387	9.40475	14.9273	16.2105		-1.05499	0.000610656	0.00247097
		ENSG00000175911	61.4942	43.1572	56.3052	37.0791	15.5636	13.5846	28.3619	30.2596		-1.05439	0.00121246	0.00459518
		ENSG00000198522	1877.56	1999.32	1931.38	1465.15	956.641	977.049	819.509	722.989	GPN1	-1.05395	4.68928e-25	3.70306e-23
		ENSG00000108379	171.589	146.206	139.169	27.5445	40.4653	51.2036	64.9338	44.3087	WNT3	-1.05226	0.00202269	0.00722949
		ENSG00000153363	202.336	192.006	197.599	151.494	95.4566	80.4628	93.2956	83.2139		-1.05183	6.33771e-14	1.40134e-12
		ENSG00000270599	16.8613	12.3306	27.6214	6.35641	7.263	8.35978	6.71729	3.2421		-1.05089	0.00628891	0.0197003
		ENSG00000239443	7.93473	8.8076	11.686	36.0197	2.07514	3.13492	1.49273	25.9368		-1.05014	0.0107905	0.0315515
		ENSG00000111266	1514.54	1249.8	1319.45	1670.68	553.025	568.465	596.346	1162.83	DUSP16	-1.04975	3.42689e-15	9.12655e-14
		ENSG00000163399	27262.7	27274.5	25443.6	17608.3	11447.5	11343.2	11723.9	11717	ATP1A1	-1.04919	9.92095e-18	3.54092e-16
		ENSG00000013725	86.2902	64.2954	78.6148	49.7919	23.8641	34.4841	42.5428	27.0175	CD6	-1.04918	7.50426e-06	4.60164e-05
		ENSG00000219626	30.7471	44.9187	59.4923	32.8415	16.6011	24.0344	14.1809	21.614	FAM228B	-1.04868	0.000248881	0.0010974
		ENSG00000111859	2672.02	2138.48	2244.77	2062.66	889.199	865.237	1270.31	1344.39	NEDD9	-1.0485	1.93875e-09	2.23954e-08
		ENSG00000156650	2502.42	2712.74	2536.92	1910.1	1085.3	1133.79	849.363	1585.39	KAT6B	-1.04771	9.09873e-10	1.09981e-08
		ENSG00000169714	13770.7	14355.5	13941.4	11316.5	7024.36	6781.87	6126.16	5736.36	CNBP	-1.04726	1.67486e-40	5.50131e-38
		ENSG00000121775	932.331	782.995	853.077	878.244	363.15	368.875	494.84	419.312	TMEM39B	-1.04637	2.06946e-15	5.67138e-14
		ENSG00000100665	139.85	172.629	143.419	126.069	64.3294	80.4628	69.4119	62.6806	SERPINA4	-1.04585	4.25748e-11	6.31076e-10
		ENSG00000172482	33.7226	35.2304	18.0602	22.2474	8.30057	21.9444	9.70275	7.5649	AGXT	-1.04575	0.00556366	0.017695
		ENSG00000162545	1662.33	1570.39	1593.54	2274.54	622.543	622.803	1094.17	979.115	CAMK2N1	-1.04558	2.64255e-07	2.11255e-06
		ENSG00000111906	2656.15	2662.54	2659.09	1865.61	1183.87	1071.1	1141.19	1279.55	HDDC2	-1.04468	3.85499e-15	1.02067e-13
		ENSG00000136997	20242.5	18827.1	18342.8	15761.8	8583.83	9004.52	7128.53	10546.6	MYC	-1.04454	1.32884e-15	3.69532e-14
		ENSG00000253626	45.6247	42.2765	55.2429	108.059	24.9017	18.8095	17.1664	60.5192	EIF5AL1	-1.04417	1.24193e-05	7.30902e-05
		ENSG00000127528	49.5921	47.561	50.9934	154.673	18.6763	12.5397	9.70275	151.298	KLF2	-1.04405	0.000812536	0.00319821
		ENSG00000118804	57.5268	45.7995	42.4945	66.7423	18.6763	21.9444	22.391	36.7438	STBD1	-1.04314	0.000110603	0.000525517
		ENSG00000172458	258.871	253.659	212.473	182.217	95.4566	114.947	105.237	117.796	IL17D	-1.0416	1.36338e-12	2.54527e-11
		ENSG00000043591	49.5921	35.2304	45.6816	33.9009	13.4884	7.3148	23.1373	32.421	ADRB1	-1.04152	0.00254353	0.00887005
		ENSG00000183023	16.8613	18.496	15.9354	4.23761	2.07514	6.26983	1.49273	11.8877	SLC8A1	-1.04109	0.0183364	0.049919
		ENSG00000183617	904.559	856.979	855.202	617.631	384.939	426.349	358.255	379.326	MRPL54	-1.04038	1.07534e-21	5.77522e-20
		ENSG00000173011	1416.35	1307.93	1257.84	1137.8	573.777	618.623	588.882	689.487	TADA2B	-1.04004	1.40423e-20	6.68602e-19
		ENSG00000151338	337.226	395.461	394.136	136.663	161.861	152.566	117.179	134.007	MIPOL1	-1.04001	1.83754e-06	1.25705e-05
		ENSG00000164402	3042.97	2935.57	2858.82	2633.67	1349.88	1366.82	1406.15	1422.2	2008-09-01	-1.03839	6.24543e-27	6.02325e-25
		ENSG00000100557	1337.99	1632.93	1557.42	938.63	577.927	574.735	838.914	591.143	C14orf105	-1.03837	1.26763e-12	2.38221e-11
		ENSG00000110628	2068.98	1742.14	1708.28	1545.67	858.071	943.61	815.031	799.718	SLC22A18	-1.0382	1.1089e-26	1.03e-24
		ENSG00000176855	51.5757	36.9919	40.3698	51.9107	20.7514	7.3148	21.6446	32.421		-1.03814	0.00158207	0.0058057
		ENSG00000235781	14.8776	10.5691	14.8731	5.29701	3.11271	6.26983	4.47819	4.3228		-1.03756	0.0124615	0.0357866
		ENSG00000173218	2782.11	2672.22	2630.41	2214.15	1235.75	1187.09	1112.83	1426.52	VANGL1	-1.03514	3.08724e-12	5.49641e-11
		ENSG00000261167	83.3147	78.3876	77.5525	51.9107	31.1271	40.7539	37.3183	28.0982		-1.03453	8.32957e-07	6.09366e-06
		ENSG00000215388	21.8205	17.6152	15.9354	12.7128	5.18786	5.22486	10.4491	7.5649		-1.03415	0.00582309	0.0184014
		ENSG00000162746	21.8205	22.8997	12.7484	37.0791	5.18786	14.6296	9.70275	10.807	FCRLB	-1.03389	0.00516138	0.016555
		ENSG00000272087	32.7308	28.1843	21.2473	13.7722	14.526	7.3148	10.4491	8.6456		-1.03346	0.00718611	0.0222009
		ENSG00000164099	60.5023	44.9187	69.0536	43.4355	30.0896	15.6746	22.391	29.1789	PRSS12	-1.03345	0.00155602	0.00572493
		ENSG00000176268	11.9021	19.3767	13.8107	16.9504	5.18786	6.26983	3.73183	11.8877		-1.03342	0.00926206	0.0276751
		ENSG00000087253	3565.67	3525.68	3716.14	1989.56	1564.66	1493.26	1472.58	1491.37	LPCAT2	-1.03321	8.32147e-15	2.10489e-13
		ENSG00000164733	9229.08	9395.06	8728.37	6492.02	4165.85	4144.36	4151.28	3858.1	CTSB	-1.03282	2.14591e-23	1.39355e-21
		ENSG00000178202	3008.25	3127.58	2984.18	1627.24	947.303	746.11	2236.11	989.922	KDELC2	-1.03281	2.8358e-05	0.000154608
		ENSG00000163803	22.8124	36.1111	26.5591	25.4256	8.30057	7.3148	20.1519	10.807	PLB1	-1.03275	0.00802361	0.0243992
		ENSG00000079739	1972.77	2035.44	1882.51	2143.17	1030.31	957.194	951.615	955.339	PGM1	-1.03254	6.21193e-17	2.03156e-15
		ENSG00000180834	181.507	147.968	171.04	143.019	91.3063	96.1374	54.4846	67.0034	MAP6D1	-1.03242	7.14748e-08	6.32776e-07
		ENSG00000257433	34.7144	23.7805	25.4967	16.9504	8.30057	12.5397	17.1664	5.4035	LOC105369748	-1.03199	0.00306791	0.0104873
		ENSG00000205918	93.2331	79.2684	109.423	65.6829	42.5404	47.0237	35.0792	38.9052		-1.03181	1.97072e-05	0.0001113
		ENSG00000214900	44.6329	55.4879	47.8063	45.5543	25.9393	27.1693	19.4055	17.2912	LINC01588	-1.03067	0.000232363	0.00102998
		ENSG00000124496	1337	1263.89	1338.58	1520.24	641.219	664.602	563.506	801.88	TRERF1	-1.03032	3.07712e-31	4.61854e-29
		ENSG00000145819	4216.32	4255.83	4220.77	4123.19	1793.96	1711.66	2244.32	2443.46	ARHGAP26	-1.02852	2.76024e-14	6.46004e-13
		ENSG00000170412	2425.05	1802.91	2034.42	1536.13	1033.42	1073.19	766.517	865.641	GPRC5C	-1.0285	5.96939e-10	7.4213e-09
		ENSG00000163539	1224.92	1260.37	1292.9	1085.89	617.355	608.174	488.869	636.533	CLASP2	-1.02796	3.75797e-13	7.59097e-12
		ENSG00000177685	1516.53	1222.49	1189.85	1660.08	650.557	811.943	547.086	673.276	CRACR2B	-1.0272	2.6054e-10	3.42709e-09
		ENSG00000120158	1836.89	1786.18	1791.14	1151.57	764.69	741.93	844.139	769.459	RCL1	-1.02691	4.3756e-11	6.47737e-10
		ENSG00000182109	33.7226	45.7995	42.4945	29.6633	17.6387	10.4497	20.8982	20.5333		-1.02675	0.000499635	0.00206336
		ENSG00000197472	205.311	206.978	241.156	225.653	99.6068	84.6427	100.759	134.007	ZNF695	-1.02621	1.93298e-06	1.31441e-05
		ENSG00000114098	2012.45	2129.68	1986.62	1457.74	1009.56	904.946	897.131	853.753	ARMC8	-1.02614	6.06479e-20	2.67417e-18
		ENSG00000137831	5778.47	6003.26	6152.14	4895.5	2387.45	2271.77	3030.99	3477.69	UACA	-1.02604	2.92788e-13	6.02154e-12
		ENSG00000137709	24.796	21.1382	25.4967	33.9009	15.5636	11.4947	5.97092	15.1298	POU2F3	-1.02566	0.00112695	0.00430204
		ENSG00000120471	55.5431	66.057	67.9912	13.7722	14.526	19.8545	28.3619	19.4526	TP53AIP1	-1.02551	0.0032361	0.010991
		ENSG00000260966	161.67	216.667	208.223	75.2175	67.4421	82.5528	76.8756	69.1648		-1.02534	1.47579e-05	8.55867e-05
		ENSG00000198088	1002.75	1169.65	1108.04	650.473	479.358	492.182	524.695	381.487	NUP62CL	-1.02513	4.4409e-13	8.82881e-12
		ENSG00000092445	1202.11	1030.49	1094.23	654.71	526.049	510.991	422.443	440.926	TYRO3	-1.02482	1.3206e-12	2.47355e-11
		ENSG00000141524	4640.83	3887.67	4060.35	3361.48	2037.79	2360.59	1506.16	1827.46	TMC6	-1.02445	2.13944e-14	5.08795e-13
		ENSG00000102580	4612.06	5081.98	4904.93	3712.14	2103.16	2064.86	2267.46	2462.92	DNAJC3	-1.02339	7.94554e-18	2.85838e-16
		ENSG00000179044	60.5023	37.8727	43.5569	30.7227	13.4884	32.3941	14.1809	19.4526	EXOC3L1	-1.02337	0.000447422	0.00186644
		ENSG00000137962	10598.8	9848.65	10979.5	6284.37	4425.24	4274.98	4604.33	4759.41	ARHGAP29	-1.02329	5.3439e-14	1.19678e-12
		ENSG00000212541	21.8205	31.7073	32.9332	8.47522	13.4884	15.6746	7.46365	5.4035		-1.02306	0.00357551	0.012007
		ENSG00000177156	15304.1	14344	13868.1	17593.5	7647.94	7709.8	6004.51	8531.05	TALDO1	-1.02178	4.62502e-25	3.66509e-23
		ENSG00000184454	886.706	883.402	884.948	634.582	489.734	457.698	312.727	336.098	NCMAP	-1.02154	2.68861e-12	4.81696e-11
		ENSG00000120519	475.092	500.271	513.121	434.355	232.416	280.052	197.04	231.27	SLC10A7	-1.02057	4.83927e-17	1.6129e-15
		ENSG00000203400	9.91841	10.5691	24.4343	25.4256	6.22543	12.5397	5.22456	5.4035		-1.01994	0.0114809	0.0332912
		ENSG00000256655	17.8531	26.4228	25.4967	11.6534	10.3757	9.40475	8.21002	7.5649		-1.01958	0.00460156	0.0149755
		ENSG00000185838	2944.78	2264.43	2184.22	1500.11	962.866	1128.57	975.499	1177.96	GNB1L	-1.01955	8.1749e-10	9.94504e-09
		ENSG00000272604	51.5757	57.2494	54.1805	45.5543	25.9393	18.8095	26.8691	27.0175		-1.01951	2.76091e-05	0.000150779
		ENSG00000135919	396.737	461.518	495.061	116.534	162.899	132.711	208.236	151.298	SERPINE2	-1.01856	0.000408107	0.00171634
		ENSG00000155957	213.246	203.455	196.537	170.564	102.72	95.0924	108.223	73.4876	TMBIM4	-1.01794	1.81884e-10	2.45224e-09
		ENSG00000212125	20.8287	23.7805	26.5591	3.17821	5.18786	9.40475	8.21002	6.4842		-1.01737	0.0126351	0.0362209
		ENSG00000215417	266.805	329.404	312.335	117.594	173.274	146.296	79.1147	78.8911	MIR17	-1.01657	1.46133e-06	1.01719e-05
		ENSG00000160207	42.6492	25.542	49.931	20.1286	11.4133	14.6296	19.4055	16.2105	HSF2BP	-1.01644	0.00187593	0.00677009
		ENSG00000112561	343.177	337.331	309.147	477.79	137.997	158.836	232.866	168.589	TFEB	-1.01632	6.19095e-09	6.52309e-08
		ENSG00000164362	118.029	74.8646	82.8643	43.4355	46.6907	31.3492	44.0355	27.0175	TERT	-1.0161	1.82269e-05	0.000103584
		ENSG00000145439	731.979	795.326	815.894	496.86	411.916	402.314	265.706	288.547	CBR4	-1.01596	1.09925e-08	1.10775e-07
		ENSG00000263429	421.533	424.526	383.513	569.958	211.665	183.915	164.2	338.259	LINC00675	-1.0158	7.78158e-16	2.22118e-14
		ENSG00000165029	391.777	442.141	396.261	355.959	207.514	179.735	110.462	274.498	ABCA1	-1.01546	3.15173e-05	0.000170236
		ENSG00000268913	149.768	149.729	174.227	47.6731	47.7283	47.0237	76.8756	60.5192		-1.01545	0.000197636	0.000889265
		ENSG00000241468	1415.36	1447.97	1478.81	2609.31	728.375	721.031	693.373	1281.71	ATP5J2	-1.01496	9.67813e-35	2.03097e-32
		ENSG00000215005	19.8368	11.4499	14.8731	55.0889	7.263	8.35978	5.97092	22.6947		-1.01451	0.00283458	0.00976781
		ENSG00000101665	1097.97	867.548	854.139	835.868	376.638	336.481	554.549	492.799	SMAD7	-1.01447	2.62596e-07	2.10002e-06
		ENSG00000163131	230.107	233.401	283.651	254.256	73.6676	47.0237	188.084	158.863	CTSS	-1.01435	0.000487402	0.00201689
		ENSG00000178026	122.988	106.572	81.8019	144.079	72.63	75.238	21.6446	42.1473	LRRC75B	-1.01407	0.000495431	0.00204824
		ENSG00000203668	2379.43	2591.19	2629.35	2173.89	1298	1286.36	994.905	1209.3	CHML	-1.01345	5.76819e-18	2.12225e-16
		ENSG00000163939	3298.86	3638.42	3550.42	3408.1	1643.51	1588.36	1547.21	2114.93	PBRM1	-1.01317	8.51143e-20	3.68839e-18
		ENSG00000145386	3820.57	4172.16	3783.07	6107.45	1913.28	1895.58	2107.73	2713.64	CCNA2	-1.01306	3.09038e-09	3.42496e-08
		ENSG00000169884	44.6329	41.3957	77.5525	21.188	21.789	25.0793	29.1082	8.6456	WNT10B	-1.01305	0.00136893	0.00511212
		ENSG00000205089	99.1841	96.0028	92.4255	154.673	49.8034	51.2036	58.9628	48.6315	CCNI2	-1.01234	2.54676e-05	0.000140063
		ENSG00000057935	1681.17	1799.39	1729.53	1856.07	910.988	864.192	731.438	985.599	MTA3	-1.01165	7.05154e-23	4.35466e-21
		ENSG00000103534	4409.73	4078.8	4147.46	4509.87	1857.25	1776.45	2145.05	2789.29	TMC5	-1.01108	3.71061e-23	2.35567e-21
		ENSG00000177679	26.7797	17.6152	26.5591	10.594	9.33814	8.35978	11.9418	5.4035	SRRM3	-1.011	0.00972606	0.0288485
		ENSG00000203697	5219.07	5543.5	6002.35	2465.23	2125.98	2366.86	2890.67	1664.28	CAPN8	-1.01093	4.71859e-14	1.06304e-12
		ENSG00000228666	36.6981	30.8266	35.058	50.8513	12.4509	8.35978	17.1664	36.7438		-1.01033	0.000746975	0.00296436
		ENSG00000196218	8.92657	14.9729	20.1849	5.29701	6.22543	6.26983	2.2391	5.4035	RYR1	-1.00971	0.0175029	0.0479667
		ENSG00000261061	373.924	384.892	356.954	567.839	148.373	118.082	233.612	325.291		-1.00959	1.6638e-06	1.14476e-05
		ENSG00000169684	314.414	280.962	311.272	364.434	127.621	110.767	186.591	191.284	CHRNA5	-1.00951	5.7257e-08	5.14542e-07
		ENSG00000135587	768.677	801.491	756.402	555.127	329.948	342.751	368.704	360.954	SMPD2	-1.00912	9.89971e-15	2.47646e-13
		ENSG00000132481	1574.05	1351.09	1320.52	1083.77	628.768	675.052	725.467	584.659	TRIM47	-1.00881	1.6569e-19	7.04538e-18
		ENSG00000170458	66.4534	29.9458	40.3698	108.059	24.9017	12.5397	20.8982	52.9543	CD14	-1.00861	0.00295812	0.0101626
		ENSG00000033050	7556.84	7575.41	7312.24	5090.43	3643.95	3653.22	2770.51	3275.6	ABCF2	-1.00841	2.13981e-11	3.31035e-10
		ENSG00000178773	1692.08	1585.37	1725.28	647.295	758.465	741.93	652.323	496.042	CPNE7	-1.00788	1.45159e-12	2.70327e-11
		ENSG00000117472	4692.4	4533.27	4339.75	3679.3	2267.09	2206.98	2601.08	1382.22	TSPAN1	-1.0074	2.27112e-05	0.000126344
		ENSG00000213493	6.94289	14.9729	11.686	70.9799	1.03757	5.22486	5.22456	37.8245		-1.00733	0.0108674	0.0317518
		ENSG00000256340	19.8368	21.1382	21.2473	9.53462	10.3757	4.17989	8.95638	7.5649	ABCC6P1	-1.00712	0.00509683	0.0163711
		ENSG00000101182	14082.2	13591.9	12913	7916.91	6223.35	6554.06	5373.83	5250.04	PSMA7	-1.00686	1.68137e-14	4.04958e-13
		ENSG00000273081	15.8695	20.2575	15.9354	10.594	7.263	8.35978	3.73183	7.5649		-1.00644	0.0109641	0.0320012
		ENSG00000170004	5508.69	5256.37	5352.18	4545.89	2281.62	2278.04	2678.7	3000.02	CHD3	-1.00611	2.66535e-13	5.51163e-12
		ENSG00000037749	2409.18	2511.05	2474.24	952.402	1188.02	1000.04	1017.3	725.15	MFAP3	-1.00606	2.64003e-11	4.02378e-10
		ENSG00000169989	57.5268	63.4147	67.9912	36.0197	16.6011	31.3492	41.7964	15.1298	TIGD4	-1.00593	0.000237548	0.00105111
		ENSG00000101898	78.3555	87.1952	100.924	76.2769	26.9769	52.2486	42.5428	42.1473		-1.00398	1.57829e-05	9.0949e-05
		ENSG00000165282	1931.12	1940.31	1849.57	1473.63	895.424	926.89	959.079	784.589	PIGO	-1.00339	4.38492e-43	1.77464e-40
		ENSG00000204681	90.2576	73.103	106.236	42.3761	34.2398	56.4285	23.1373	31.3403	GABBR1	-1.00319	0.00046066	0.00191673
		ENSG00000172830	4414.69	4032.12	3926.49	3702.61	2054.39	2278.04	1651.71	1974.44	SSH3	-1.00299	2.12028e-21	1.09712e-19
		ENSG00000119977	2082.87	2096.21	2052.48	1400.53	804.118	853.742	1201.65	824.575	TCTN3	-1.00298	8.92539e-09	9.13664e-08
		ENSG00000164251	5723.92	5525.89	5244.88	2401.66	1906.02	1888.26	2898.88	2029.56	F2RL1	-1.00288	2.86977e-07	2.28373e-06
		ENSG00000095752	36.6981	47.561	42.4945	13.7722	13.4884	17.7645	10.4491	20.5333	IL11	-1.00272	0.00558958	0.0177725
		ENSG00000135766	1285.43	1402.17	1257.84	2406.96	788.554	809.853	632.171	807.283	EGLN1	-1.00248	2.14445e-11	3.313e-10
		ENSG00000204950	93.2331	83.6722	77.5525	240.484	68.4797	63.7433	31.3473	45.3894	LRRC10B	-1.00236	0.00235612	0.00829566
		ENSG00000172465	151.752	159.417	143.419	151.494	58.104	88.8226	76.1292	73.4876	TCEAL1	-1.00196	4.81189e-09	5.19318e-08
		ENSG00000267082	11.9021	16.7344	16.9978	19.0692	7.263	5.22486	8.21002	7.5649	LOC105372273	-1.0019	0.00563391	0.0178959
		ENSG00000196440	347.144	394.58	356.954	126.069	116.208	125.397	206.743	112.393	ARMCX4	-1.00165	2.93586e-05	0.000159602
		ENSG00000184178	636.762	625.339	549.241	671.661	307.121	252.883	349.299	306.919	SCFD2	-1.00128	1.15007e-08	1.15486e-07
		ENSG00000128203	41.6573	48.4418	46.744	23.3068	14.526	24.0344	15.6737	19.4526	ASPHD2	-1.00115	0.00368003	0.0123233
		ENSG00000215784	140.841	174.39	160.417	139.841	59.1416	57.4735	100.759	76.7297	FAM72D	-1.00109	2.14321e-05	0.000120083
		ENSG00000099337	1280.47	1044.58	1044.3	511.691	385.976	453.518	531.412	483.073	KCNK6	-1.00082	7.28044e-06	4.47286e-05
		ENSG00000004399	5578.12	5199.12	5085.53	7752.7	2857.47	3123.42	2378.67	3085.4	PLXND1	-1.00073	7.31542e-08	6.46381e-07
		ENSG00000213064	2224.7	2502.24	2310.64	1333.79	987.768	1074.23	956.84	1042.88	SFT2D2	-1.00062	5.44286e-12	9.31699e-11
		ENSG00000138297	1449.08	1469.99	1321.58	1135.68	697.248	634.298	726.213	599.789		-1.00043	1.35312e-19	5.78625e-18
		Name
		ENSG00000101246	1568.1	1385.43	1367.26	1096.48	2930.1	3207.02	2862.31	1992.81	ARFRP1	1.00121	2.28701e-24	1.67203e-22
		ENSG00000168778	297.552	287.128	259.216	275.445	723.187	646.838	417.964	502.526	TCTN2	1.00148	3.70382e-09	4.04937e-08
		ENSG00000132329	183.491	147.968	134.92	115.475	296.745	323.941	233.612	379.326	RAMP1	1.00219	9.77908e-05	0.000470259
		ENSG00000214655	719.085	744.242	646.979	1226.79	1931.96	1932.15	1285.99	1579.98	ZSWIM8	1.00228	4.65334e-06	2.95747e-05
		ENSG00000115042	336.234	327.643	358.016	472.493	814.493	901.811	700.837	630.048	FAHD2A	1.00267	1.23742e-10	1.71529e-09
		ENSG00000239521	88.2739	104.81	103.049	105.94	264.581	281.097	121.657	180.477	GATS	1.00286	0.000176769	0.000802381
		ENSG00000112855	1064.25	1085.1	1074.05	976.769	2270.21	2225.79	2320.45	1694.54	HARS2	1.00308	2.09625e-30	2.79467e-28
		ENSG00000151692	43.641	32.5881	30.8085	27.5445	60.1791	80.4628	75.3829	63.7613	RNF144A	1.00326	4.69833e-05	0.000244059
		ENSG00000161835	10.9103	13.2114	11.686	2.1188	25.9393	29.2592	12.6882	16.2105	GRASP	1.00384	0.00675812	0.0210018
		ENSG00000172748	46.6165	64.2954	62.6794	41.3167	159.786	132.711	97.7738	63.7613	ZNF596	1.00422	6.34023e-07	4.74397e-06
		ENSG00000261706	29.7552	12.3306	16.9978	16.9504	50.841	51.2036	41.7964	24.8561		1.00697	0.00217913	0.00772894
		ENSG00000114026	315.406	259.824	266.653	477.79	572.739	543.385	694.866	831.059	OGG1	1.00754	1.85463e-14	4.43857e-13
		ENSG00000106780	243.001	288.008	291.087	563.602	688.947	703.266	559.774	781.347	MEGF9	1.0077	4.50192e-09	4.87024e-08
		ENSG00000105321	1101.94	938.89	975.249	1585.92	2212.1	2296.85	2075.64	2616.38	CCDC9	1.00966	8.90407e-18	3.19813e-16
		ENSG00000272658	42.6492	45.7995	56.3052	41.3167	112.058	95.0924	94.7884	83.2139		1.01004	9.54667e-07	6.88843e-06
		ENSG00000103496	1044.41	888.686	961.438	1083.77	2164.37	2090.99	1824.86	1971.2	STX4	1.01026	6.84759e-23	4.24027e-21
		ENSG00000273004	13.8858	16.7344	21.2473	8.47522	45.6531	20.8994	41.0501	24.8561		1.01057	0.00371798	0.0124339
		ENSG00000186575	1659.35	1722.77	1528.74	4653.95	3164.59	3204.93	4784.2	7791.85	NF2	1.01085	3.97023e-07	3.08578e-06
		ENSG00000136235	14.8776	9.68835	12.7484	14.8316	41.5028	19.8545	47.021	15.1298	GPNMB	1.01117	0.0074489	0.0228973
		ENSG00000115234	1535.37	1492.89	1484.12	1771.32	3494.54	3530.96	3449.7	2514.79	SNX17	1.01143	3.69575e-14	8.44361e-13
		ENSG00000167968	39.6737	35.2304	31.8709	28.6039	69.5173	82.5528	70.9047	59.4385	DNASE1L2	1.01146	4.04729e-06	2.60369e-05
		ENSG00000162814	20.8287	15.8537	18.0602	20.1286	42.5404	45.9788	37.3183	33.5017	SPATA17	1.01169	0.000138763	0.000643528
		ENSG00000156958	637.754	750.407	721.344	822.096	1552.21	1427.43	1686.78	1318.45	GALK2	1.01178	2.78341e-16	8.39989e-15
		ENSG00000207507	4.95921	7.04608	5.31181	9.53462	16.6011	7.3148	17.1664	21.614	RNU6-9	1.01437	0.00834088	0.0252488
		ENSG00000172361	5.95105	10.5691	13.8107	7.41581	22.8266	15.6746	18.6591	28.0982	CFAP53	1.01489	0.00471388	0.0152862
		ENSG00000249459	17.8531	28.1843	21.2473	43.4355	65.367	58.5184	42.5428	63.7613	ZNF286B	1.01497	3.20255e-05	0.000172692
		ENSG00000188010	278.707	290.651	305.96	217.177	629.806	587.274	550.817	462.54	MORN2	1.01557	1.76671e-16	5.45475e-15
		ENSG00000230373	21.8205	17.6152	20.1849	4.23761	25.9393	49.1137	49.2601	22.6947	GOLGA6L17P	1.01562	0.00966144	0.0286831
		ENSG00000153233	77.3636	85.4337	64.8041	95.3462	250.055	235.119	61.9483	155.621	PTPRR	1.01575	0.0011461	0.00436998
		ENSG00000263069	18.845	19.3767	20.1849	12.7128	33.2023	51.2036	27.6155	44.3087	LOC100294362	1.01605	0.000437089	0.00182737
		ENSG00000135899	556.423	482.656	506.747	520.166	781.291	770.144	1945.77	912.111	SP110	1.0167	8.53421e-05	0.000416627
		ENSG00000134253	88.2739	61.6532	80.7396	91.1086	203.364	177.645	173.903	119.958	TRIM45	1.01707	1.0173e-07	8.71355e-07
		ENSG00000155792	137.866	209.621	215.66	188.574	474.17	467.102	342.582	296.112	DEPTOR	1.01715	4.11928e-08	3.79355e-07
		ENSG00000141854	29.7552	23.7805	15.9354	46.6137	76.7803	88.8226	30.601	60.5192	MISP3	1.01824	0.00268959	0.00932204
		ENSG00000008838	1626.62	1489.36	1514.93	2863.56	3717.62	3809.97	3806.46	3653.85	MED24	1.01873	4.78228e-11	7.0289e-10
		ENSG00000135740	118.029	110.976	111.548	51.9107	257.318	259.153	194.801	105.909	SLC9A5	1.01883	1.33691e-08	1.32486e-07
		ENSG00000163913	1163.43	1166.13	1036.87	1256.45	2854.36	2818.29	2064.45	1831.79	IFT122	1.01884	6.10834e-13	1.18628e-11
		ENSG00000258821	22.8124	21.1382	20.1849	28.6039	61.2167	47.0237	50.7528	39.9859		1.01884	0.000185655	0.000839355
		ENSG00000142945	2026.33	2406.24	1974.93	2895.35	4896.3	4767.16	4843.16	4682.68	KIF2C	1.01912	5.711e-09	6.07672e-08
		ENSG00000251880	4.95921	17.6152	7.43654	3.17821	22.8266	20.8994	15.6737	19.4526		1.01944	0.0154974	0.0432128
		ENSG00000167703	666.517	656.166	513.121	699.205	1500.33	1642.7	1116.56	1024.5	SLC43A2	1.01949	3.38909e-10	4.37916e-09
		ENSG00000140941	2004.51	1795.87	1974.93	1362.39	3572.36	3328.24	3734.81	4131.52	MAP1LC3B	1.0196	4.84828e-11	7.11667e-10
		ENSG00000189319	659.574	667.616	566.239	780.779	1511.74	1628.07	1168.81	1186.61	FAM53B	1.0199	3.36084e-13	6.81635e-12
		ENSG00000084731	279.699	296.816	339.956	636.701	1114.35	1165.14	294.068	890.497	KIF3C	1.02016	0.00858223	0.0258954
		ENSG00000139926	132.907	128.591	110.486	84.7522	206.477	227.804	285.858	221.544	FRMD6	1.02046	1.0238e-08	1.03864e-07
		ENSG00000145996	493.937	503.794	523.745	613.394	1165.19	1191.27	941.166	1052.6	CDKAL1	1.02047	1.03761e-21	5.59335e-20
		ENSG00000109089	870.837	768.022	748.966	1295.65	1846.88	2092.03	1328.53	2202.47	CDR2L	1.02105	6.37001e-10	7.88476e-09
		ENSG00000150457	835.13	753.049	762.776	959.818	1531.46	1507.89	1983.84	1719.39	LATS2	1.02137	1.15898e-15	3.23088e-14
		ENSG00000267216	32.7308	34.3496	41.4321	20.1286	64.3294	82.5528	73.1438	48.6315		1.02165	2.29786e-06	1.5472e-05
		ENSG00000087008	348.136	342.615	338.894	176.92	779.216	684.457	539.622	454.975	ACOX3	1.02189	7.69713e-12	1.28744e-10
		ENSG00000255153	21.8205	21.1382	14.8731	11.6534	38.3901	37.619	41.0501	32.421	TOLLIP-AS1	1.02318	0.00010982	0.000522234
		ENSG00000119655	425.5	353.185	430.257	1029.74	1081.15	1079.46	745.619	1454.62	NPC2	1.02326	8.17702e-08	7.14984e-07
		ENSG00000116128	1023.58	1102.71	1043.24	2312.67	2968.49	2860.09	2269.7	2670.41	BCL9	1.02376	6.50291e-09	6.82008e-08
		ENSG00000083750	149.768	148.848	165.729	189.633	354.849	323.941	472.449	236.673	RRAGB	1.02481	4.74987e-08	4.32855e-07
		ENSG00000105559	628.827	446.545	509.934	234.128	733.563	839.112	1748.73	517.656	PLEKHA4	1.02534	1.79723e-05	0.000102291
		ENSG00000168675	7.93473	9.68835	31.8709	51.9107	34.2398	31.3492	40.3037	117.796	LDLRAD4	1.0258	0.00126457	0.00476135
		ENSG00000197620	380.867	409.553	360.141	312.524	793.742	768.054	770.249	664.631	CXorf40A	1.02605	2.14321e-31	3.28201e-29
		ENSG00000164610	324.332	317.954	311.272	486.265	736.676	713.716	570.223	919.676	RP9	1.02634	8.15138e-21	3.96444e-19
		ENSG00000143067	248.952	205.217	251.78	199.168	502.184	531.891	506.782	338.259	ZNF697	1.02644	2.01873e-11	3.12731e-10
		ENSG00000149179	1120.78	1121.21	1012.43	1033.98	2464.23	2489.12	1814.41	2054.41	C11orf49	1.02705	1.91992e-19	8.10299e-18
		ENSG00000166262	32.7308	18.496	21.2473	11.6534	49.8034	48.0687	52.9919	30.2596	FAM227B	1.02817	0.000427905	0.00178997
		ENSG00000120217	43.641	31.7073	45.6816	36.0197	36.315	39.7089	181.367	111.312	CD274	1.02847	0.0117658	0.0340257
		ENSG00000007968	483.027	480.014	433.444	311.464	748.089	714.761	1352.41	730.554	E2F2	1.02878	4.00861e-07	3.11134e-06
		ENSG00000162572	43.641	23.7805	19.1225	7.41581	59.1416	72.1031	50.0065	24.8561	SCNN1D	1.02883	0.00120091	0.00455828
		ENSG00000198040	456.247	453.591	501.435	406.81	1020.97	1035.57	963.557	743.522	ZNF84	1.02923	3.53985e-16	1.05701e-14
		ENSG00000162430	264.822	239.567	231.595	429.058	554.063	508.901	790.401	536.027	SELENON	1.02931	1.82384e-07	1.49929e-06
		ENSG00000226465	13.8858	8.8076	14.8731	8.47522	24.9017	34.4841	35.0792	9.72631	LOC105372582	1.0295	0.00131544	0.00493188
		ENSG00000128524	847.032	864.906	717.095	1556.26	1887.34	1983.36	1677.83	2421.85	ATP6V1F	1.02963	1.00703e-13	2.16541e-12
		ENSG00000166816	10.9103	14.0922	14.8731	11.6534	41.5028	34.4841	23.1373	17.2912	LDHD	1.03064	0.0011428	0.00435814
		ENSG00000159788	597.088	590.109	573.676	668.483	1321.87	1484.91	1133.73	1095.83	RGS12	1.03151	4.88548e-11	7.16664e-10
		ENSG00000263834	5.95105	7.04608	2.12473	4.23761	15.5636	15.6746	17.9128	2.1614	MIR4635	1.03243	0.0174512	0.0478484
		ENSG00000248690	10.9103	12.3306	9.56126	11.6534	24.9017	25.0793	37.3183	12.9684		1.03252	0.00172071	0.00626679
		ENSG00000196204	609.982	553.998	542.867	398.335	1180.76	1240.38	993.412	918.595	RNF216P1	1.03338	1.28646e-18	4.99251e-17
		ENSG00000124299	1381.63	1094.78	1143.1	818.918	2750.6	2805.75	1836.06	1824.22	PEPD	1.03422	4.56475e-11	6.74416e-10
		ENSG00000134901	97.2005	108.333	110.486	122.891	268.731	228.849	219.431	199.93	KDELC1	1.03453	1.438e-10	1.97296e-09
		ENSG00000166619	2867.41	2416.8	2602.79	2919.71	4679.45	4721.18	6884.47	6185.93	BLCAP	1.03458	3.45259e-12	6.07999e-11
		ENSG00000264364	3173.89	3062.4	3105.29	7013.24	9324.65	9293.98	7522.61	7076.43	DYNLL2	1.03468	1.26976e-06	8.97067e-06
		ENSG00000100814	758.759	813.822	743.654	958.759	2206.91	1994.85	1447.2	1309.81	CCNB1IP1	1.035	7.82566e-08	6.88245e-07
		ENSG00000233967	2.97552	12.3306	10.6236	11.6534	16.6011	22.9894	21.6446	25.9368		1.03558	0.0037065	0.012401
		ENSG00000110442	1194.18	1301.76	1147.35	1482.1	2716.36	2693.94	2442.85	2706.07	COMMD9	1.03562	9.17848e-25	6.98058e-23
		ENSG00000224376	0.991841	3.52304	3.18709	7.41581	10.3757	6.26983	9.70275	12.9684		1.03656	0.0177189	0.0484942
		ENSG00000175220	972.005	1009.35	942.316	2954.67	2515.07	2565.41	3416.11	3345.85	ARHGAP1	1.0369	8.65324e-05	0.000421757
		ENSG00000091592	8.92657	3.52304	5.31181	14.8316	19.7139	15.6746	6.71729	36.7438	NLRP1	1.03751	0.00993202	0.0293557
		ENSG00000204387	1440.15	1383.67	1305.64	1397.35	3427.1	3470.35	2503.31	2399.16	C6orf48	1.03767	1.17261e-06	8.33627e-06
		ENSG00000175137	1418.33	1345.8	1252.53	1628.3	3439.55	3582.16	2234.62	2487.77	SH3BP5L	1.03826	5.03064e-11	7.37003e-10
		ENSG00000186409	14.8776	19.3767	23.372	22.2474	49.8034	38.664	46.2746	37.8245	CCDC30	1.03944	8.32465e-05	0.000407582
		ENSG00000124134	12.8939	4.4038	8.4989	1.0594	18.6763	16.7196	11.9418	17.2912	KCNS1	1.03969	0.0152284	0.0425674
		ENSG00000063438	100.176	81.9106	112.61	232.009	320.61	334.391	151.512	273.417	AHRR	1.04056	4.99828e-05	0.000257691
		ENSG00000166670	5.95105	10.5691	10.6236	0	17.6387	14.6296	17.1664	14.0491	MMP10	1.04162	0.0182877	0.0498105
		ENSG00000186577	134.89	106.572	104.112	230.95	319.572	307.222	273.916	268.014	C6orf1	1.04176	2.95734e-08	2.78228e-07
		ENSG00000124374	349.128	418.361	356.954	834.809	1164.15	1111.85	646.352	1032.07	PAIP2B	1.04185	1.23086e-06	8.72033e-06
		ENSG00000116032	16.8613	3.52304	10.6236	28.6039	43.578	44.9338	18.6591	29.1789	GRIN3B	1.04214	0.01012	0.0298282
		ENSG00000147166	44.6329	44.038	41.4321	51.9107	122.433	131.666	76.8756	69.1648	ITGB1BP2	1.04263	9.52502e-06	5.72765e-05
		ENSG00000125657	56.535	71.3415	63.7418	43.4355	210.627	207.949	55.9774	65.9227	TNFSF9	1.04375	0.00138741	0.00517514
		ENSG00000099977	9.91841	12.3306	10.6236	6.35641	19.7139	28.2142	26.1228	15.1298	DDT	1.04439	0.00181991	0.00659098
		ENSG00000010270	1453.05	1539.57	1437.38	874.007	2587.7	2721.11	2967.55	2690.94	STARD3NL	1.04525	1.14432e-13	2.449e-12
		ENSG00000177042	721.069	575.136	633.168	918.501	1456.75	1610.3	1540.5	1384.38	TMEM80	1.04639	4.60853e-10	5.84487e-09
		ENSG00000135953	1390.56	1341.4	1406.57	1776.62	3574.43	3579.03	2527.19	2689.86	MFSD9	1.04659	9.40857e-14	2.03664e-12
		ENSG00000141985	1061.27	950.34	904.071	1244.8	1994.21	2081.58	2014.44	2558.02	SH3GL1	1.04723	7.45287e-27	7.03799e-25
		ENSG00000145088	62.486	78.3876	71.1783	99.5838	189.876	161.971	136.585	170.751	EAF2	1.04759	8.51781e-08	7.4273e-07
		ENSG00000043039	134.89	130.352	141.294	395.157	320.61	335.436	475.435	478.75	BARX2	1.04803	9.73555e-05	0.000468464
		ENSG00000155034	561.382	473.849	489.749	753.235	997.106	1171.41	1023.27	1542.16	FBXL18	1.04807	2.42733e-25	2.02254e-23
		ENSG00000166925	1674.23	1309.69	1341.76	2326.45	3518.4	3976.12	3304.9	3097.29	TSC22D4	1.04969	1.17132e-09	1.39061e-08
		ENSG00000260034	5.95105	7.92684	14.8731	8.47522	17.6387	27.1693	17.9128	23.7754	LCMT1-AS2	1.04984	0.00414451	0.0136726
		ENSG00000186868	48.6002	42.2765	40.3698	51.9107	170.162	153.611	45.5283	56.1964	MAPT	1.05042	0.00227755	0.00804902
		ENSG00000120833	2.97552	2.64228	2.12473	65.6829	13.4884	7.3148	14.9273	96.1824	SOCS2	1.0507	0.0156885	0.0436812
		ENSG00000172000	8.92657	5.28456	10.6236	7.41581	29.052	20.8994	17.1664	9.72631	ZNF556	1.05134	0.00399578	0.0132244
		ENSG00000136144	1226.91	1251.56	1325.83	1501.17	3416.72	3341.82	2644.37	2040.36	RCBTB1	1.0516	1.08882e-07	9.25964e-07
		ENSG00000243406	25.7879	25.542	29.7462	14.8316	48.7658	61.6533	46.2746	50.7929	MRPS31P5	1.0517	7.02883e-06	4.33473e-05
		ENSG00000223759	8.92657	7.92684	7.43654	5.29701	14.526	11.4947	26.8691	17.2912		1.0525	0.0104749	0.0307357
		ENSG00000262194	15.8695	8.8076	11.686	16.9504	31.1271	38.664	20.1519	30.2596		1.05263	0.000735646	0.00292585
		ENSG00000249626	33.7226	51.0841	41.4321	44.4949	101.682	78.3729	142.556	61.5999		1.05319	8.22364e-05	0.000402811
		ENSG00000168661	221.181	252.778	253.905	199.168	665.083	608.174	433.638	300.435	ZNF30	1.05394	1.61076e-10	2.19257e-09
		ENSG00000042317	52.5676	53.7263	84.989	88.9898	190.913	129.577	128.375	143.733	SPATA7	1.05416	2.46195e-07	1.98005e-06
		ENSG00000172613	731.979	689.635	691.598	875.066	1789.81	1821.39	1387.49	1319.54	RAD9A	1.05441	7.40285e-12	1.24188e-10
		ENSG00000140830	434.427	431.572	457.878	521.226	945.227	968.689	924.746	1018.02	TXNL4B	1.05565	6.7551e-27	6.45982e-25
		ENSG00000099330	138.858	137.398	135.982	250.019	425.404	400.224	275.409	297.193	OCEL1	1.05607	3.62605e-07	2.84166e-06
		ENSG00000042832	1.98368	1.76152	5.31181	5.29701	14.526	8.35978	6.71729	9.72631	TG	1.05619	0.0143676	0.0404807
		ENSG00000197045	1989.63	2147.29	2077.98	1454.56	4801.88	4106.74	4564.77	2720.12	GMFB	1.05644	2.58433e-35	5.74227e-33
		ENSG00000117682	851.992	896.613	876.449	1132.5	2013.93	2070.09	1945.03	1806.93	DHDDS	1.05669	7.32002e-25	5.64289e-23
		ENSG00000096093	569.317	583.063	589.611	540.295	1586.45	1434.75	1078.5	846.189	EFHC1	1.05709	5.80945e-11	8.44551e-10
		ENSG00000131470	416.573	413.076	372.889	440.711	846.658	791.044	797.118	1051.52	PSMC3IP	1.05761	5.68997e-14	1.26802e-12
		ENSG00000161642	213.246	185.84	169.978	477.79	573.777	590.409	412.74	528.463	ZNF385A	1.05803	1.38149e-06	9.66959e-06
		ENSG00000257698	8.92657	6.16532	7.43654	16.9504	14.526	16.7196	26.8691	30.2596		1.0589	0.00422961	0.0139109
		ENSG00000196182	1422.3	1355.49	1343.89	3355.13	3219.58	3269.72	4654.33	3859.18	STK40	1.05898	1.27787e-07	1.07186e-06
		ENSG00000163406	65.4615	70.4608	87.1137	59.3265	164.974	176.6	183.606	92.9402	SLC15A2	1.06048	2.17048e-07	1.76314e-06
		ENSG00000155324	66.4534	93.3605	73.303	126.069	236.566	190.185	207.489	136.168	GRAMD3	1.06065	3.80277e-07	2.96682e-06
		ENSG00000126453	973.988	864.025	780.836	1652.67	2422.73	2584.22	2498.08	1676.17	BCL2L12	1.06106	3.6459e-06	2.36832e-05
		ENSG00000255145	9.91841	0.88076	3.18709	5.29701	16.6011	10.4497	14.9273	8.6456	STX17-AS1	1.06151	0.0179715	0.0490789
		ENSG00000198477	83.3147	126.829	97.7374	100.643	246.942	228.849	196.294	199.93		1.06158	1.719e-10	2.33151e-09
		ENSG00000271847	3.96737	12.3306	9.56126	2.1188	15.5636	24.0344	14.9273	12.9684		1.06205	0.00601062	0.018907
		ENSG00000073150	69.4289	51.9648	62.6794	30.7227	118.283	137.936	85.0856	140.491	PANX2	1.06242	7.10652e-05	0.000352125
		ENSG00000124380	522.7	607.724	573.676	1254.33	1426.66	1344.88	1464.37	1744.25	SNRNP27	1.06337	1.27148e-12	2.38747e-11
		ENSG00000185345	19.8368	22.019	13.8107	24.3662	43.578	40.7539	45.5283	46.4701	PARK2	1.06519	3.79382e-05	0.000200801
		ENSG00000124839	1220.96	1229.54	1129.29	1338.02	2918.69	3094.16	2395.09	2087.91	RAB17	1.06522	3.49985e-12	6.15365e-11
		ENSG00000163734	17.8531	15.8537	29.7462	44.4949	52.9161	54.3385	52.2456	71.3262	CXCL3	1.06539	2.44765e-05	0.000135071
		ENSG00000154479	7.93473	20.2575	12.7484	28.6039	46.6907	43.8888	34.3328	28.0982	CCDC173	1.06546	0.00210332	0.00747875
		ENSG00000253719	2583.75	2806.98	2669.72	3546.88	7469.48	7326.3	5384.28	4833.97	ATXN7L3B	1.06556	1.31267e-10	1.81404e-09
		ENSG00000238369	6.94289	27.3035	19.1225	3.17821	48.7658	45.9788	26.1228	11.8877		1.06654	0.00309323	0.0105628
		ENSG00000164845	11.9021	7.04608	10.6236	6.35641	28.0144	26.1243	17.9128	12.9684		1.0666	0.00215881	0.00766661
		ENSG00000203965	137.866	193.767	143.419	98.5244	367.3	339.616	299.292	221.544	EFCAB7	1.07065	1.45507e-11	2.32237e-10
		ENSG00000183248	204.319	182.317	158.292	361.256	507.372	536.071	283.619	618.161	PRR36	1.07074	4.7659e-05	0.000247286
		ENSG00000246859	23.8042	33.4689	26.5591	36.0197	71.5924	102.407	44.0355	55.1157	STARD4-AS1	1.07079	0.00013288	0.000619414
		ENSG00000159200	261.846	224.594	225.221	236.247	522.936	471.282	629.186	398.779	RCAN1	1.07084	7.58306e-14	1.66211e-12
		ENSG00000222041	347.144	291.531	318.709	283.92	589.34	587.274	960.572	532.785	CYTOR	1.07131	7.16339e-11	1.02624e-09
		ENSG00000197647	10.9103	22.8997	32.9332	26.485	50.841	45.9788	79.1147	36.7438	ZNF433	1.0742	0.00101148	0.00389272
		ENSG00000272894	102.16	97.7643	83.9266	108.059	141.11	155.701	293.321	273.417		1.07428	2.38151e-06	1.5983e-05
		ENSG00000153130	1912.27	2186.93	2119.41	653.651	4459.48	3985.52	4036.34	1672.92	SCOC	1.07463	4.145e-31	6.14001e-29
		ENSG00000139687	3567.65	4061.18	3690.65	4288.46	8924.15	7977.32	8154.78	8001.51	RB1	1.07516	6.09373e-35	1.30291e-32
		ENSG00000138107	2958.66	3076.49	2778.08	4410.29	7461.17	7442.29	6163.48	6784.64	ACTR1A	1.07536	1.73325e-17	6.01567e-16
		ENSG00000099769	5.95105	4.4038	7.43654	3.17821	14.526	25.0793	8.95638	6.4842	IGFALS	1.07588	0.0111808	0.0325541
		ENSG00000178662	4.95921	1.76152	6.37418	8.47522	13.4884	11.4947	20.8982	9.72631	CSRNP3	1.07603	0.00978951	0.0289984
		ENSG00000165655	316.397	214.025	217.784	563.602	673.384	830.753	346.313	873.206	ZNF503	1.07703	2.26005e-06	1.52355e-05
		ENSG00000140961	537.578	382.25	407.947	340.068	1130.95	1139.02	614.258	765.136	OSGIN1	1.0774	6.89913e-07	5.11823e-06
		ENSG00000175471	457.239	483.537	546.054	461.899	1066.62	1030.34	1032.22	1033.15	MCTP1	1.07846	1.02286e-17	3.63354e-16
		ENSG00000167562	10.9103	8.8076	9.56126	13.7722	21.789	30.3042	30.601	18.3719	ZNF701	1.07913	0.0026065	0.00906439
		ENSG00000147872	347.144	310.908	298.524	309.345	918.251	828.663	535.89	494.961	PLIN2	1.07958	2.68078e-09	3.01076e-08
		ENSG00000235245	37.69	39.6342	56.3052	34.9603	102.72	126.442	74.6365	68.0841		1.08094	7.03008e-07	5.21026e-06
		ENSG00000175221	519.725	499.391	450.442	2006.51	1547.02	1747.19	1274.79	1967.96	MED16	1.081	6.40103e-06	3.9746e-05
		ENSG00000111729	7.93473	6.16532	6.37418	6.35641	19.7139	14.6296	20.1519	11.8877	CLEC4A	1.08209	0.00761836	0.023358
		ENSG00000214719	4.95921	4.4038	6.37418	13.7722	24.9017	15.6746	15.6737	14.0491		1.08217	0.00670136	0.0208511
		ENSG00000236255	72.4044	66.057	52.0558	70.9799	147.335	154.656	123.15	141.572		1.08229	5.58663e-11	8.14247e-10
		ENSG00000264222	10.9103	9.68835	9.56126	8.47522	25.9393	24.0344	21.6446	20.5333		1.08311	0.00121558	0.00460471
		ENSG00000068971	177.54	149.729	141.294	287.098	405.69	459.788	341.089	403.101	PPP2R5B	1.08318	4.76056e-08	4.33655e-07
		ENSG00000140553	2540.11	2343.7	2137.47	2893.23	6331.26	6361.79	4010.22	4630.8	UNC45A	1.08358	7.05804e-12	1.1902e-10
		ENSG00000186174	2897.17	2664.3	2604.91	8566.32	7022.28	7837.29	7803.25	10070	BCL9L	1.08417	1.63569e-08	1.60274e-07
		ENSG00000255320	22.8124	21.1382	27.6214	46.6137	58.104	68.9681	60.4556	67.0034		1.08445	8.53698e-06	5.17986e-05
		ENSG00000223697	11.9021	18.496	14.8731	4.23761	36.315	36.574	32.0937	10.807		1.08461	0.000615986	0.00248987
		ENSG00000171224	466.165	464.16	415.384	228.831	1062.47	1057.51	681.431	560.884	C10orf35	1.08557	6.77412e-13	1.30774e-11
		ENSG00000113552	2333.8	2344.58	2218.21	1542.49	5130.79	4983.47	4581.93	3348.01	GNPDA1	1.08629	8.54479e-26	7.41989e-24
		ENSG00000114956	1129.71	1148.51	1043.24	503.216	1983.84	1989.63	2174.91	1915	DGUOK	1.08679	9.98716e-11	1.40154e-09
		ENSG00000259153	36.6981	60.7724	37.1827	63.5641	93.3814	100.317	146.288	96.1824		1.08688	9.84038e-06	5.90189e-05
		ENSG00000223764	12.8939	7.04608	8.4989	3.17821	29.052	22.9894	9.70275	19.4526	LOC100130417	1.08695	0.00568953	0.0180548
		ENSG00000229666	3.96737	4.4038	8.4989	7.41581	12.4509	17.7645	12.6882	17.2912		1.08704	0.00519321	0.0166476
		ENSG00000097007	1841.85	1641.74	1546.8	2555.28	4328.75	4374.25	3707.2	3693.83	ABL1	1.0871	1.90106e-15	5.22883e-14
		ENSG00000070501	489.97	546.071	558.803	462.959	1255.46	1261.28	979.231	927.241	POLB	1.08736	1.59192e-22	9.42019e-21
		ENSG00000168477	26.7797	16.7344	24.4343	12.7128	36.315	53.2936	48.5137	41.0666	TNXB	1.08831	9.94528e-05	0.000477138
		ENSG00000236624	55.5431	60.7724	65.8665	80.5145	151.485	145.251	157.483	117.796		1.08996	1.9676e-06	1.33755e-05
		ENSG00000100439	290.61	271.274	286.838	383.504	710.736	713.716	559.027	653.824	ABHD4	1.09003	3.20139e-16	9.58472e-15
		ENSG00000230084	5.95105	6.16532	7.43654	2.1188	13.4884	18.8095	14.1809	7.5649		1.09057	0.00779354	0.0238146
		ENSG00000269737	19.8368	15.8537	30.8085	26.485	58.104	55.3835	42.5428	52.9543		1.09078	2.35081e-05	0.00013033
		ENSG00000129197	557.415	591.87	627.856	732.047	1603.05	1569.55	1134.47	1140.14	RPAIN	1.09091	5.29436e-12	9.09026e-11
		ENSG00000141294	49.5921	39.6342	36.1203	29.6633	121.396	104.497	64.1874	61.5999	LRRC46	1.09102	3.21666e-05	0.000173412
		ENSG00000105219	21.8205	19.3767	20.1849	86.871	97.5317	126.442	37.3183	65.9227	CNTD2	1.09229	0.00792371	0.0241407
		ENSG00000235316	33.7226	25.542	38.2451	36.0197	62.2543	75.238	70.1583	87.5367		1.09336	5.86204e-07	4.41386e-06
		ENSG00000122008	544.521	561.925	568.364	716.156	1277.25	1155.74	1534.53	1168.24	POLK	1.09407	2.71243e-18	1.02457e-16
		ENSG00000233369	76.3718	72.2223	75.4277	170.564	338.248	263.333	94.7884	247.48	GTF2IP4	1.09654	0.00597475	0.0188098
		ENSG00000213190	120.013	142.683	124.296	154.673	405.69	349.021	229.134	215.059	MLLT11	1.0967	2.00266e-07	1.63444e-06
		ENSG00000130311	686.354	605.082	519.495	1360.27	1596.82	1691.81	1691.26	1705.35	DDA1	1.09686	7.69143e-08	6.76966e-07
		ENSG00000115507	125.964	108.333	126.421	339.009	490.771	503.676	176.889	493.88	OTX1	1.09687	0.00765461	0.0234531
		ENSG00000099284	26.7797	14.0922	12.7484	19.0692	44.6156	57.4735	39.5573	29.1789	H2AFY2	1.0973	0.000490154	0.00202753
		ENSG00000063978	1514.54	1631.17	1408.69	4256.68	4240.55	4030.46	4846.89	4996.08	RNF4	1.09804	3.69097e-07	2.88854e-06
		ENSG00000188868	20.8287	14.0922	22.3096	11.6534	41.5028	32.3941	58.2165	24.8561	ZNF563	1.09863	0.000283192	0.00123523
		ENSG00000196313	2554.98	2701.29	2371.19	1988.5	5223.13	5360.71	4661.05	5569.93	POM121	1.09882	3.13471e-19	1.28705e-17
		ENSG00000230266	47.6084	24.6613	31.8709	42.3761	39.4277	40.7539	153.751	117.796	XXYLT1-AS2	1.09904	0.00196743	0.00705872
		ENSG00000267374	45.6247	42.2765	64.8041	57.2077	119.321	101.362	129.121	124.281	MIR924HG	1.09971	4.85686e-05	0.0002512
		ENSG00000240445	44.6329	45.7995	47.8063	62.5047	115.17	135.846	88.0711	103.747		1.09988	1.0417e-07	8.90234e-07
		ENSG00000109819	28.7634	20.2575	30.8085	87.9304	76.7803	67.9232	123.15	82.1332	PPARGC1A	1.10023	0.000427007	0.00178687
		ENSG00000150873	5.95105	3.52304	8.4989	7.41581	15.5636	17.7645	10.4491	21.614	C2orf50	1.10031	0.00967976	0.02873
		ENSG00000104892	24.796	15.8537	15.9354	15.891	52.9161	87.7776	11.9418	34.5824	KLC3	1.10094	0.0078642	0.0239949
		ENSG00000204386	1122.76	927.44	1040.05	1294.59	2604.3	2533.01	2134.6	2279.2	NEU1	1.10147	5.89557e-10	7.34161e-09
		ENSG00000169379	779.587	773.307	809.52	775.482	1710.95	1499.53	1892.78	1682.65	ARL13B	1.10233	2.60699e-25	2.15638e-23
		ENSG00000150773	61.4942	60.7724	66.9288	30.7227	137.997	132.711	124.643	87.5367	PIH1D2	1.10242	1.03817e-08	1.05181e-07
		ENSG00000122877	78.3555	71.3415	59.4923	19.0692	143.185	129.577	193.309	39.9859	EGR2	1.10286	2.01613e-08	1.94358e-07
		ENSG00000189014	9.91841	9.68835	3.18709	11.6534	34.2398	24.0344	8.95638	21.614		1.10302	0.00308875	0.0105538
		ENSG00000187860	135.882	147.087	139.169	75.2175	348.624	332.301	211.221	197.768	CCDC157	1.10322	2.1378e-09	2.45322e-08
		ENSG00000068985	6.94289	9.68835	8.4989	19.0692	45.6531	39.7089	7.46365	28.0982	PAGE1	1.10335	0.0147826	0.0414696
		ENSG00000110876	4.95921	6.16532	2.12473	50.8513	21.789	12.5397	11.1955	92.9402	SELPLG	1.10351	0.00245834	0.0086077
		ENSG00000119242	127.948	143.564	145.544	429.058	389.089	416.944	347.06	518.736	CCDC92	1.10372	4.26544e-09	4.62546e-08
		ENSG00000166579	597.088	645.597	636.355	944.987	1534.57	1523.57	1431.53	1537.84	NDEL1	1.10682	9.84859e-21	4.74912e-19
		ENSG00000124785	6.94289	8.8076	5.31181	26.485	46.6907	41.7989	5.97092	27.0175	NRN1	1.10682	0.0131926	0.0375814
		ENSG00000223461	13.8858	13.2114	21.2473	7.41581	30.0896	36.574	50.0065	14.0491		1.10727	0.000655487	0.00263684
		ENSG00000198750	0.991841	4.4038	4.24945	19.0692	16.6011	16.7196	8.95638	21.614		1.10745	0.0113046	0.0328725
		ENSG00000188660	3.96737	3.52304	11.686	12.7128	14.526	25.0793	21.6446	17.2912	LINC00319	1.10804	0.00755492	0.0231886
		ENSG00000168256	1484.79	1506.1	1393.82	1919.64	3642.91	3676.21	2819.02	3460.4	NKIRAS2	1.1081	7.62164e-23	4.65598e-21
		ENSG00000182319	1830.94	1499.93	1465	3122.06	3467.56	4008.51	4315.48	4957.17		1.10961	2.31063e-15	6.3059e-14
		ENSG00000130522	811.326	671.139	610.858	3357.24	2001.47	2329.24	1385.25	4503.28	JUND	1.11042	4.94621e-08	4.49839e-07
		ENSG00000243335	256.887	253.659	233.72	172.683	487.658	458.743	644.859	407.424	KCTD7	1.1106	1.30748e-14	3.21396e-13
		ENSG00000168758	1186.24	1045.46	1057.05	757.472	2575.25	2738.87	1791.28	1786.4	SEMA4C	1.11109	1.50102e-11	2.39065e-10
		ENSG00000111961	1281.46	1345.8	1296.08	1132.5	2212.1	2296.85	3757.2	2824.95	SASH1	1.11114	4.06874e-13	8.1461e-12
		ENSG00000232833	13.8858	15.8537	10.6236	22.2474	54.9913	44.9338	38.811	18.3719		1.11577	0.000587822	0.00238753
		ENSG00000230733	538.57	490.583	534.368	702.383	1247.16	1293.68	1165.08	1235.24		1.11647	1.3347e-20	6.36836e-19
		ENSG00000145029	82.3228	88.9567	58.4299	113.356	224.115	222.579	166.439	167.509	NICN1	1.11704	3.13897e-06	2.05137e-05
		ENSG00000235106	367.973	373.442	342.081	544.533	922.401	1028.25	694.866	922.918	LINC00094	1.11743	1.66688e-09	1.94133e-08
		ENSG00000163141	8.92657	5.28456	12.7484	11.6534	22.8266	25.0793	16.42	29.1789	BNIPL	1.11763	0.000465521	0.00193447
		ENSG00000188641	56.535	81.0299	73.303	69.9205	173.274	195.41	164.947	100.505	DPYD	1.1178	1.37889e-09	1.6184e-08
		ENSG00000187801	45.6247	60.7724	42.4945	98.5244	148.373	127.487	122.404	142.652	ZFP69B	1.11923	2.54449e-09	2.8705e-08
		ENSG00000003393	1512.56	1537.81	1511.74	1592.28	3993.61	3836.09	2930.23	2791.45	ALS2	1.11963	1.57771e-16	4.92523e-15
		ENSG00000122550	784.546	757.453	655.478	653.651	2016	1896.62	1333.75	1129.33	KLHL7	1.12015	7.41034e-15	1.89557e-13
		ENSG00000082068	778.595	848.171	781.899	1419.6	2337.65	2177.72	1812.17	1962.55	WDR70	1.12039	1.91114e-12	3.49026e-11
		ENSG00000273055	8.92657	8.8076	7.43654	10.594	25.9393	25.0793	17.1664	19.4526		1.12076	0.00103639	0.00397711
		ENSG00000254343	6.94289	17.6152	9.56126	6.35641	31.1271	28.2142	20.1519	20.5333		1.12188	0.000449536	0.00187353
		ENSG00000214300	175.556	162.06	184.851	120.772	334.098	414.854	394.827	269.094	SPDYE3	1.1236	4.65075e-21	2.30645e-19
		ENSG00000085662	6.94289	7.04608	10.6236	18.0098	18.6763	22.9894	17.1664	43.228	AKR1B1	1.12379	0.000745088	0.00295894
		ENSG00000213398	119.021	88.076	118.985	96.4056	226.191	266.468	258.242	188.042	LCAT	1.12557	1.26552e-12	2.38023e-11
		ENSG00000130830	3.96737	7.04608	4.24945	62.5047	20.7514	10.4497	21.6446	104.828	MPP1	1.12558	0.00201353	0.00720027
		ENSG00000175267	8.92657	10.5691	10.6236	11.6534	35.2774	26.1243	26.1228	15.1298	VWA3A	1.12566	0.000464369	0.00193038
		ENSG00000136960	17.8531	21.1382	20.1849	1.0594	48.7658	38.664	44.7819	8.6456	ENPP2	1.12624	8.60859e-05	0.000419761
		ENSG00000224424	10.9103	7.92684	12.7484	8.47522	30.0896	14.6296	29.1082	23.7754	PRKAR2A-AS1	1.12626	0.00155911	0.00573259
		ENSG00000115459	306.479	291.531	337.831	305.108	720.074	734.615	715.764	568.448	ELMOD3	1.12675	2.57824e-25	2.14041e-23
		ENSG00000141376	173.572	172.629	173.165	294.514	508.41	529.801	364.972	397.698	BCAS3	1.12692	2.5914e-08	2.45841e-07
		ENSG00000105270	61.4942	66.9377	52.0558	98.5244	161.861	189.14	117.179	156.702	CLIP3	1.12694	8.85995e-08	7.70751e-07
		ENSG00000232498	19.8368	11.4499	18.0602	7.41581	25.9393	40.7539	51.4992	17.2912		1.12794	0.000471799	0.00195804
		ENSG00000272692	4.95921	0.88076	3.18709	6.35641	11.4133	9.40475	12.6882	8.6456		1.12838	0.00934119	0.0278858
		ENSG00000259471	89.2657	119.783	105.174	144.079	279.107	258.108	255.257	225.866	LINC01169	1.12852	2.07943e-13	4.34761e-12
		ENSG00000135315	287.634	328.523	327.208	320.999	741.863	756.56	633.664	671.115	CEP162	1.12879	8.47605e-17	2.72098e-15
		ENSG00000075213	1314.19	1314.09	1409.76	2046.76	3949	3735.77	2524.21	3165.37	SEMA3A	1.12906	5.23175e-13	1.02483e-11
		ENSG00000138092	1024.57	1097.43	1064.49	1278.7	2386.41	2249.82	2511.52	2702.83	CENPO	1.12923	3.60664e-22	2.03335e-20
		ENSG00000115844	5.95105	10.5691	10.6236	8.47522	20.7514	14.6296	21.6446	34.5824	DLX2	1.13252	0.00150272	0.00554777
		ENSG00000181045	164.646	133.875	154.043	80.5145	425.404	426.349	203.758	178.316	SLC26A11	1.13259	4.30158e-06	2.75398e-05
		ENSG00000251192	115.054	126.829	123.234	120.772	282.219	279.008	288.097	230.189	ZNF674	1.13342	2.37189e-17	8.08368e-16
		ENSG00000237437	24.796	22.019	26.5591	15.891	58.104	49.1137	45.5283	52.9543		1.13342	8.66716e-06	5.2508e-05
		ENSG00000115257	29.7552	27.3035	32.9332	41.3167	85.0808	86.7327	66.4265	61.5999	PCSK4	1.13377	3.16964e-06	2.06903e-05
		ENSG00000267259	1.98368	7.04608	5.31181	4.23761	11.4133	15.6746	23.1373	3.2421		1.13397	0.00787595	0.0240263
		ENSG00000167378	907.535	922.155	874.324	1809.46	2792.1	2739.92	1442.72	2790.37	IRGQ	1.13528	2.87134e-09	3.20414e-08
		ENSG00000269896	87.282	71.3415	74.3654	45.5543	221.003	188.095	126.136	100.505	LOC100129534	1.13566	6.85509e-09	7.16622e-08
		ENSG00000100296	3099.5	3034.22	3031.98	3708.97	8042.21	7790.27	5084.24	7679.46	THOC5	1.13582	2.49189e-16	7.57055e-15
		ENSG00000005961	3.96737	7.04608	4.24945	19.0692	34.2398	36.574	14.9273	7.5649	ITGA2B	1.13644	0.0136642	0.038735
		ENSG00000136378	92.2412	79.2684	66.9288	64.6235	240.717	274.828	107.477	103.747	ADAMTS7	1.13768	0.000145723	0.000673188
		ENSG00000143198	456.247	456.233	452.566	671.661	1241.97	1174.55	853.842	1237.4	MGST3	1.13783	2.30554e-14	5.45436e-13
		ENSG00000183696	607.007	539.906	460.003	391.979	930.701	1062.74	1132.98	1345.47	UPP1	1.13819	4.42705e-14	1.00536e-12
		ENSG00000237821	5.95105	5.28456	9.56126	29.6633	23.8641	21.9444	16.42	51.8736		1.13868	0.00101899	0.00391696
		ENSG00000123364	26.7797	43.1572	43.5569	95.3462	181.575	136.891	61.9483	101.586	HOXC13	1.13913	0.000258518	0.00113636
		ENSG00000140545	1130.7	980.285	1037.93	1358.15	3140.73	3193.43	1834.57	2134.38	MFGE8	1.13951	9.2675e-07	6.71479e-06
		ENSG00000177150	1486.77	1610.03	1484.12	1000.08	2427.92	2299.98	4717.77	3101.61	FAM210A	1.13955	1.5774e-08	1.5483e-07
		ENSG00000154099	4.95921	5.28456	6.37418	4.23761	25.9393	24.0344	5.97092	5.4035	DNAAF1	1.13992	0.00857836	0.0258881
		ENSG00000143919	368.965	335.569	292.15	525.463	775.066	784.774	859.066	926.16	CAMKMT	1.14028	4.95119e-18	1.83656e-16
		ENSG00000169435	442.361	405.149	484.437	489.444	1102.94	962.419	913.551	1129.33	RASSF6	1.1404	1.23139e-11	1.98776e-10
		ENSG00000128965	243.001	118.022	179.539	184.336	222.04	239.299	1362.12	274.498	CHAC1	1.14095	0.0125351	0.0359659
		ENSG00000121289	1248.73	1272.7	1263.15	1828.53	3249.67	3106.7	2603.32	3398.8	CEP89	1.14128	6.07227e-29	7.09392e-27
		ENSG00000175130	4992.93	5557.59	4683.96	16401.7	18947.1	19055.1	11169.4	16942.1	MARCKSL1	1.14208	8.09121e-06	4.92955e-05
		ENSG00000175697	5.95105	10.5691	3.18709	6.35641	16.6011	12.5397	28.3619	15.1298	GPR156	1.14239	0.00914162	0.0273765
		ENSG00000132952	1186.24	1257.72	1228.09	1032.92	3063.95	2851.73	2693.63	1951.75	USPL1	1.14259	3.62514e-36	8.64845e-34
		ENSG00000169427	10.9103	6.16532	13.8107	8.47522	36.315	28.2142	15.6737	18.3719	KCNK9	1.14299	0.00207664	0.00739781
		ENSG00000259318	2.97552	0.88076	9.56126	5.29701	13.4884	16.7196	9.70275	11.8877		1.14422	0.00816146	0.0247718
		ENSG00000254363	42.6492	62.5339	69.0536	44.4949	133.847	176.6	127.628	74.5683	LOC101929719	1.14426	8.19713e-08	7.16466e-07
		ENSG00000188958	23.8042	32.5881	30.8085	5.29701	41.5028	33.4391	105.237	37.8245	UTS2B	1.14463	0.0031527	0.0107513
		ENSG00000150636	4.95921	7.92684	9.56126	10.594	13.4884	19.8545	33.5864	19.4526	CCDC102B	1.14519	0.00432981	0.0141869
		ENSG00000180901	1129.71	1168.77	980.561	1117.67	2944.63	2887.26	2210.73	1896.63	KCTD2	1.14525	2.62826e-16	7.97415e-15
		ENSG00000186496	13.8858	16.7344	7.43654	11.6534	34.2398	34.4841	28.3619	27.0175	ZNF396	1.14603	0.00067301	0.00270014
		ENSG00000070718	580.227	626.22	558.803	425.88	1426.66	1392.95	1249.42	859.157	AP3M2	1.1469	9.75867e-31	1.34043e-28
		ENSG00000256294	141.833	133.875	114.735	130.306	346.549	310.357	274.662	245.319	ZNF225	1.14731	5.82382e-15	1.50847e-13
		ENSG00000225793	1.98368	6.16532	7.43654	10.594	18.6763	13.5846	18.6591	16.2105		1.14785	0.00612853	0.0192405
		ENSG00000156509	21.8205	14.9729	7.43654	10.594	44.6156	22.9894	48.5137	21.614	FBXO43	1.14815	0.00244917	0.00857927
		ENSG00000012822	1185.25	1194.31	1234.47	2029.81	3889.85	3809.97	2457.03	2777.4	CALCOCO1	1.14895	2.71721e-06	1.80278e-05
		ENSG00000130775	2.97552	0	3.18709	30.7227	10.3757	6.26983	11.9418	52.9543	THEMIS2	1.14999	0.00841253	0.0254419
		ENSG00000117010	55.5431	65.1762	67.9912	79.4551	174.312	146.296	188.83	116.716	ZNF684	1.15033	2.93823e-07	2.33492e-06
		ENSG00000234536	6.94289	5.28456	8.4989	3.17821	14.526	14.6296	19.4055	12.9684		1.15091	0.00325769	0.011056
		ENSG00000178199	15.8695	5.28456	7.43654	4.23761	20.7514	28.2142	17.9128	24.8561	ZC3H12D	1.15113	0.00712403	0.0220242
		ENSG00000126461	2468.69	2292.62	2009.99	7427.47	6448.51	7145.52	6495.61	8819.6	SCAF1	1.15198	7.56413e-09	7.84593e-08
		ENSG00000155099	239.034	220.19	226.283	269.088	490.771	499.497	623.961	521.978	TMEM55A	1.15316	4.39796e-18	1.63885e-16
		ENSG00000104221	216.221	185.84	176.352	102.762	468.982	425.304	325.415	299.354	BRF2	1.15343	4.59145e-14	1.03788e-12
		ENSG00000216775	203.327	165.583	185.913	274.385	483.508	427.394	542.607	418.231	LOC730101	1.1535	3.49087e-12	6.14264e-11
		ENSG00000063127	45.6247	59.8916	38.2451	47.6731	147.335	148.386	88.8174	75.649	SLC6A16	1.15456	1.74936e-06	1.19926e-05
		ENSG00000272760	9.91841	8.8076	9.56126	8.47522	21.789	21.9444	22.391	25.9368		1.15466	0.00117384	0.00447049
		ENSG00000254184	83.3147	94.2413	79.6772	112.297	179.5	181.825	332.879	158.863		1.15475	5e-07	3.81677e-06
		ENSG00000135622	147.784	93.3605	95.6126	60.3859	326.835	297.817	182.113	129.684	SEMA4F	1.15694	2.12236e-06	1.43672e-05
		ENSG00000163517	323.34	237.805	269.84	354.9	931.739	923.755	417.218	518.736	HDAC11	1.15725	4.60827e-06	2.93293e-05
		ENSG00000187189	668.501	640.312	677.787	563.602	1909.13	1889.31	1224.78	918.595	TSPYL4	1.15775	1.71647e-12	3.1602e-11
		ENSG00000138029	2436.95	2608.81	2507.18	1570.03	6330.22	6060.84	4779.72	3463.65	HADHB	1.15824	1.15277e-21	6.11861e-20
		ENSG00000131171	853.975	933.605	820.144	638.819	2337.65	2131.74	1537.51	1403.83	SH3BGRL	1.15845	5.14282e-13	1.00915e-11
		ENSG00000251705	382.851	511.721	404.76	84.7522	1655.96	1013.62	494.094	185.88		1.16001	2.06223e-05	0.000116063
		ENSG00000239779	105.135	124.187	109.423	172.683	391.164	362.605	163.454	275.579	WBP1	1.16051	1.84971e-06	1.26385e-05
		ENSG00000126773	899.6	960.909	926.38	719.334	2439.33	2143.24	1962.94	1417.88	PCNX4	1.16097	5.59242e-33	1.03046e-30
		ENSG00000105520	161.67	130.352	122.172	101.703	244.867	222.579	441.848	283.144	PLPPR2	1.16245	9.79489e-08	8.42472e-07
		ENSG00000113312	1532.39	1721	1644.54	2069.01	4457.41	4218.55	3092.19	3938.07	TTC1	1.16268	7.5795e-21	3.69423e-19
		ENSG00000260425	4.95921	9.68835	3.18709	1.0594	15.5636	21.9444	8.21002	11.8877		1.16316	0.015125	0.0423252
		ENSG00000227542	1.98368	4.4038	1.06236	5.29701	8.30057	9.40475	13.4346	7.5649		1.16359	0.00944263	0.0281441
		ENSG00000108799	537.578	555.759	547.117	744.76	1660.11	1557.01	1291.96	991.002	EZH1	1.16442	1.59366e-12	2.94606e-11
		ENSG00000229419	12.8939	22.8997	21.2473	18.0098	42.5404	41.7989	49.2601	56.1964	RALGAPA1P1	1.16554	0.000626018	0.00252636
		ENSG00000214708	8.92657	9.68835	6.37418	10.594	13.4884	19.8545	35.0792	22.6947	LOC105371730	1.1658	0.00157899	0.00579629
		ENSG00000221953	3.96737	1.76152	1.06236	16.9504	6.22543	14.6296	14.9273	22.6947		1.16659	0.00751787	0.0230843
		ENSG00000198721	51.5757	56.3686	55.2429	24.3662	116.208	99.2723	116.433	97.2631	ECI2	1.16675	5.19302e-08	4.69839e-07
		ENSG00000140527	2.97552	14.9729	16.9978	6.35641	41.5028	32.3941	28.3619	8.6456	WDR93	1.16677	0.00150326	0.00554858
		ENSG00000268204	1.98368	0.88076	7.43654	2.1188	12.4509	14.6296	5.97092	8.6456		1.16723	0.016953	0.0466712
		ENSG00000140463	575.268	577.778	572.613	469.315	1655.96	1551.78	969.528	901.304	BBS4	1.16824	1.41479e-13	3.01077e-12
		ENSG00000139645	1875.57	1623.24	1740.15	3091.33	4019.55	4216.46	5195.45	5162.51	ANKRD52	1.16848	8.69339e-16	2.46592e-14
		ENSG00000196503	7.93473	7.04608	8.4989	15.891	21.789	27.1693	31.3473	16.2105	ARL9	1.16987	0.00130568	0.00489851
		ENSG00000272812	3.96737	7.04608	8.4989	6.35641	20.7514	13.5846	25.3764	9.72631		1.17041	0.00258362	0.00899328
		ENSG00000167646	83.3147	64.2954	67.9912	177.98	247.98	280.052	135.838	220.463	DNAAF3	1.17056	1.24406e-05	7.31777e-05
		ENSG00000214022	3266.13	3041.26	2867.32	7367.08	8502.9	9107.98	8725.01	9670.11	REPIN1	1.17072	1.7388e-10	2.35554e-09
		ENSG00000123091	1214.01	1254.2	1254.65	2038.29	3744.59	3500.66	2886.94	2829.27	RNF11	1.17073	4.20383e-14	9.55622e-13
		ENSG00000176401	26.7797	37.8727	40.3698	26.485	95.4566	82.5528	96.2811	45.3894	EID2B	1.17122	1.75413e-05	0.000100115
		ENSG00000228285	3.96737	3.52304	1.06236	22.2474	12.4509	10.4497	11.9418	39.9859		1.17135	0.0016713	0.0061035
		ENSG00000235314	16.8613	9.68835	8.4989	24.3662	26.9769	38.664	28.3619	51.8736		1.17165	0.000294757	0.00127977
		ENSG00000232260	3.96737	2.64228	1.06236	8.47522	14.526	3.13492	13.4346	15.1298		1.17194	0.0111088	0.032361
		ENSG00000115355	116.045	148.848	132.795	127.128	281.182	304.087	305.263	325.291	CCDC88A	1.17387	3.87363e-11	5.79102e-10
		ENSG00000102547	551.464	493.225	507.809	409.989	1160	1102.45	1168.06	1053.68	CAB39L	1.17398	1.12564e-19	4.85008e-18
		ENSG00000240449	47.6084	41.3957	32.9332	110.178	117.246	86.7327	112.701	206.414		1.17419	2.45924e-08	2.34186e-07
		ENSG00000138617	432.443	414.838	431.319	402.573	941.077	884.046	1237.47	796.476	PARP16	1.1751	3.47093e-19	1.41484e-17
		ENSG00000117519	659.574	672.02	667.164	1060.46	1935.07	1877.81	1162.84	1915	CNN3	1.17512	9.56155e-13	1.81341e-11
		ENSG00000196787	13.8858	8.8076	14.8731	18.0098	29.052	34.4841	44.0355	27.0175	HIST1H2AG	1.17526	0.000158452	0.00072666
		ENSG00000144031	8.92657	2.64228	1.06236	6.35641	13.4884	13.5846	14.1809	11.8877	ANKRD53	1.1765	0.0072576	0.0223882
		ENSG00000260698	2.97552	4.4038	1.06236	6.35641	16.6011	14.6296	9.70275	6.4842		1.17651	0.0147318	0.0413526
		ENSG00000268655	4.95921	3.52304	5.31181	4.23761	14.526	13.5846	11.1955	10.807	LOC101059948	1.17676	0.00600285	0.0188851
		ENSG00000260597	29.7552	39.6342	35.058	68.8611	128.659	110.767	91.0565	83.2139		1.17694	1.37949e-05	8.04133e-05
		ENSG00000130513	2359.59	1704.27	1692.34	3277.79	4735.47	5610.45	3041.44	8082.56	GDF15	1.17794	1.10036e-07	9.34375e-07
		ENSG00000182687	2.97552	7.04608	6.37418	12.7128	14.526	15.6746	14.9273	31.3403	GALR2	1.17797	0.00297656	0.0102167
		ENSG00000105479	14.8776	10.5691	21.2473	26.485	71.5924	78.3729	35.0792	17.2912	CCDC114	1.17797	0.00160751	0.00589239
		ENSG00000269516	1.98368	4.4038	6.37418	3.17821	36.315	21.9444	4.47819	1.0807		1.17833	0.0169587	0.0466729
		ENSG00000105464	1165.41	986.451	966.75	3091.33	3353.43	3670.99	2339.85	3693.83	GRIN2D	1.17864	1.64794e-08	1.61057e-07
		ENSG00000111653	425.5	428.049	438.756	643.057	1346.77	1326.07	915.79	943.452	ING4	1.18023	6.82251e-08	6.05661e-07
		ENSG00000218902	0.991841	3.52304	1.06236	4.23761	7.263	8.35978	8.21002	7.5649		1.18098	0.0159028	0.0441809
		ENSG00000186907	23.8042	7.04608	18.0602	55.0889	73.6676	72.1031	27.6155	77.8104	RTN4RL2	1.18294	0.00209085	0.00744144
		ENSG00000124702	1503.63	1535.16	1334.33	3815.97	5092.4	5161.12	3921.4	4149.89	KLHDC3	1.1843	4.42689e-07	3.41378e-06
		ENSG00000248559	0.991841	7.04608	4.24945	1.0594	7.263	10.4497	10.4491	15.1298		1.18498	0.0129672	0.0370277
		ENSG00000173715	135.882	126.829	120.047	279.682	373.526	379.325	414.979	342.582	C11orf80	1.18521	9.38731e-08	8.10183e-07
		ENSG00000240476	171.589	93.3605	126.421	45.5543	197.139	206.904	331.386	324.21		1.18522	5.88401e-05	0.000298802
		ENSG00000121671	1027.55	863.144	928.505	756.413	2417.54	2347.01	1871.14	1626.45	CRY2	1.18578	3.32414e-20	1.50677e-18
		ENSG00000100034	566.341	532.86	572.613	1073.17	1696.43	1760.78	1530.79	1316.29	PPM1F	1.18599	3.67547e-09	4.02225e-08
		ENSG00000104826	5.95105	4.4038	1.06236	2.1188	14.526	9.40475	10.4491	8.6456	LHB	1.18734	0.0121614	0.0350134
		ENSG00000163545	154.727	109.214	121.109	222.474	374.563	383.505	419.457	251.803	NUAK2	1.18781	3.31752e-07	2.61252e-06
		ENSG00000161021	1555.21	1642.62	1526.61	3724.86	5205.49	5034.67	4560.29	4236.35	MAML1	1.18791	2.25028e-08	2.15555e-07
		ENSG00000123453	138.858	90.7182	80.7396	67.8017	323.722	304.087	169.425	125.361	SARDH	1.18824	4.76541e-07	3.6537e-06
		ENSG00000237877	2.97552	3.52304	1.06236	1.0594	3.11271	6.26983	22.391	2.1614	LINC01473	1.18935	0.0163944	0.0453401
		ENSG00000175198	347.144	392.819	381.388	746.878	1302.15	1183.95	824.733	958.581	PCCA	1.19168	6.30471e-09	6.6337e-08
		ENSG00000257773	3.96737	0.88076	3.18709	10.594	8.30057	7.3148	5.97092	37.8245		1.19232	0.00790465	0.0240891
		ENSG00000235078	3.96737	4.4038	1.06236	3.17821	8.30057	8.35978	7.46365	16.2105		1.19333	0.00962421	0.028595
		ENSG00000136888	1907.31	1986.99	2064.17	2707.83	4952.33	4850.76	4220.69	5841.19	ATP6V1G1	1.19335	2.29743e-30	3.02727e-28
		ENSG00000250120	16.8613	7.92684	13.8107	13.7722	34.2398	36.574	23.1373	37.8245	PCDHA10	1.19338	4.81009e-05	0.000249293
		ENSG00000149582	175.556	153.252	188.038	205.524	539.537	519.351	272.423	411.747	TMEM25	1.19457	6.69544e-06	4.13927e-05
		ENSG00000178053	636.762	629.743	690.536	572.077	1871.78	1767.05	1351.67	1024.5	MLF1	1.19468	5.20752e-13	1.02096e-11
		ENSG00000010318	86.2902	83.6722	69.0536	93.2274	237.604	156.746	203.758	178.316	PHF7	1.19486	3.23482e-12	5.73213e-11
		ENSG00000266648	6.94289	3.52304	2.12473	8.47522	13.4884	11.4947	15.6737	17.2912		1.19492	0.00304434	0.010424
		ENSG00000250999	3.96737	2.64228	6.37418	1.0594	7.263	14.6296	8.21002	12.9684		1.19506	0.00757394	0.0232438
		ENSG00000166974	296.561	255.42	264.528	387.741	867.41	771.189	558.281	600.87	MAPRE2	1.19604	1.38432e-12	2.58224e-11
		ENSG00000185305	203.327	272.155	209.285	155.732	518.786	449.338	516.485	461.459	ARL15	1.19614	5.8151e-18	2.13604e-16
		ENSG00000011021	589.154	574.255	612.983	798.789	1604.09	1563.28	1255.39	1500.01	CLCN6	1.19623	1.01499e-24	7.6679e-23
		ENSG00000227359	35.7063	19.3767	26.5591	10.594	43.578	49.1137	88.8174	46.4701		1.19658	0.000232469	0.00103004
		ENSG00000166997	80.3391	101.287	78.6148	137.722	253.167	269.603	205.25	202.091	CNPY4	1.19683	1.52363e-10	2.07863e-09
		ENSG00000163001	534.602	623.578	552.429	1006.43	1923.66	1853.78	1221.8	1336.83	CFAP36	1.19705	9.61892e-09	9.80671e-08
		ENSG00000149050	113.07	103.93	131.733	122.891	322.685	305.132	273.17	206.414	ZNF214	1.1973	1.82602e-12	3.34288e-11
		ENSG00000164897	2052.12	1715.72	1623.29	4828.75	4833.01	5749.44	4382.66	7314.18	TMUB1	1.19824	1.66247e-12	3.06827e-11
		ENSG00000224597	348.136	361.992	337.831	263.791	670.271	645.793	797.118	983.438	SVIL-AS1	1.19921	6.60825e-15	1.69999e-13
		ENSG00000162676	16.8613	23.7805	14.8731	12.7128	46.6907	52.2486	29.1082	44.3087	GFI1	1.20081	5.97135e-05	0.000302356
		ENSG00000174521	14.8776	13.2114	11.686	2.1188	30.0896	39.7089	20.1519	17.2912	TTC9B	1.20161	0.00052189	0.00214588
		ENSG00000237149	54.5513	37.8727	43.5569	88.9898	129.696	132.711	110.462	151.298	ZNF503-AS2	1.20258	8.26923e-09	8.51494e-08
		ENSG00000174132	153.735	125.949	138.107	174.801	362.112	388.73	334.372	299.354	FAM174A	1.20371	1.52738e-15	4.23184e-14
		ENSG00000263272	35.7063	37.8727	50.9934	46.6137	160.824	133.756	91.0565	51.8736		1.20478	2.9242e-06	1.9221e-05
		ENSG00000196593	8.92657	2.64228	7.43654	1.0594	16.6011	11.4947	17.1664	11.8877		1.20492	0.00636716	0.0199069
		ENSG00000052344	1417.34	1157.32	1203.66	2928.19	4136.8	4277.07	3360.14	3308.02	PRSS8	1.20544	7.77573e-09	8.04699e-08
		ENSG00000119335	8638.94	9392.42	8976.96	23693.5	29093.5	27160.9	27129.6	29873.8	SET	1.20678	4.20556e-09	4.56488e-08
		ENSG00000158604	1913.26	1848.71	1861.26	3348.77	5534.4	5415.04	4954.37	4720.5	TMED4	1.20692	1.2129e-14	2.99772e-13
		ENSG00000270949	106.127	131.233	124.296	139.841	217.89	293.637	292.575	400.94		1.2074	2.35099e-09	2.67484e-08
		ENSG00000250802	21.8205	11.4499	15.9354	15.891	43.578	65.8332	55.9774	11.8877		1.20763	0.00093362	0.00362508
		ENSG00000142459	83.3147	63.4147	61.617	182.217	217.89	210.039	185.845	264.772	EVI5L	1.20771	1.41882e-08	1.39992e-07
		ENSG00000260672	1.98368	1.76152	2.12473	3.17821	7.263	13.5846	8.95638	2.1614		1.2078	0.0121542	0.0349973
		ENSG00000261770	8.92657	21.1382	9.56126	14.8316	29.052	35.529	48.5137	27.0175		1.20962	0.000109867	0.000522348
		ENSG00000189042	267.797	273.916	235.844	169.504	561.326	527.711	709.047	421.473	ZNF567	1.20968	1.77819e-16	5.47567e-15
		ENSG00000176076	7.93473	4.4038	7.43654	13.7722	23.8641	13.5846	18.6591	32.421	KCNE5	1.21067	0.000979302	0.00378236
		ENSG00000159885	151.752	142.683	160.417	118.653	486.621	415.899	282.872	207.495	ZNF222	1.21245	8.06535e-10	9.84877e-09
		ENSG00000189238	2.97552	4.4038	9.56126	0	13.4884	8.35978	37.3183	2.1614		1.21296	0.0159595	0.044316
		ENSG00000182308	26.7797	40.5149	48.8687	22.2474	79.893	96.1374	67.1729	91.8595	DCAF4L1	1.21369	4.76421e-06	3.01947e-05
		ENSG00000173894	857.943	839.364	815.894	603.859	2169.56	2255.05	1327.04	1668.6	CBX2	1.21463	7.65941e-11	1.09247e-09
		ENSG00000160325	634.778	579.54	616.17	944.987	1864.52	2117.11	1491.98	1234.16	CACFD1	1.216	3.50378e-10	4.51961e-09
		ENSG00000102024	4521.8	4725.27	4453.42	2895.35	10341.5	9357.72	10741.7	8085.8	PLS3	1.21783	6.77952e-34	1.3361e-31
		ENSG00000258704	5.95105	14.9729	9.56126	11.6534	37.3526	29.2592	20.8982	23.7754		1.21848	0.000215108	0.000960823
		ENSG00000268632	0	0	1.06236	0	3.11271	7.3148	0.746365	4.3228		1.21895	0.0174614	0.0478615
		ENSG00000180881	67.4452	109.214	62.6794	96.4056	218.928	197.5	228.388	165.347	CAPS2	1.22019	2.60019e-11	3.9684e-10
		ENSG00000162849	6.94289	4.4038	10.6236	6.35641	18.6763	22.9894	19.4055	15.1298	KIF26B	1.22109	0.000960649	0.00372046
		ENSG00000179981	394.753	347.019	321.896	977.828	1168.31	1129.61	1226.28	989.922	TSHZ1	1.22356	8.9318e-08	7.75893e-07
		ENSG00000237575	1.98368	1.76152	2.12473	4.23761	10.3757	11.4947	4.47819	8.6456	PYY2	1.22442	0.0059311	0.0186905
		ENSG00000260874	3.96737	3.52304	10.6236	10.594	25.9393	20.8994	17.1664	14.0491	LOC105371050	1.22468	0.0017948	0.00651152
		ENSG00000180596	45.6247	34.3496	55.2429	33.9009	81.9681	99.2723	211.221	54.035	HIST1H2BC	1.22632	0.000282984	0.00123461
		ENSG00000178585	309.454	240.447	276.214	243.662	710.736	731.48	587.389	526.301	CTNNBIP1	1.22691	2.88859e-15	7.79369e-14
		ENSG00000272168	0	0	2.12473	8.47522	6.22543	14.6296	5.22456	9.72631	CASC15	1.22718	0.0165742	0.0457648
		ENSG00000096654	265.813	302.101	292.15	385.622	855.996	748.2	786.669	574.933	ZNF184	1.22718	1.30644e-16	4.1296e-15
		ENSG00000150722	39.6737	17.6152	24.4343	19.0692	46.6907	34.4841	104.491	76.7297	PPP1R1C	1.2278	0.000487573	0.00201722
		ENSG00000235027	39.6737	23.7805	25.4967	19.0692	88.1936	111.812	32.8401	48.6315		1.22837	0.000125906	0.000590551
		ENSG00000269533	6.94289	1.76152	2.12473	2.1188	13.4884	6.26983	11.9418	10.807		1.22853	0.0102253	0.0300812
		ENSG00000115271	1003.74	1053.39	955.064	864.472	2697.69	2457.77	2489.87	1646.99	GCA	1.23091	2.49532e-38	6.81372e-36
		ENSG00000224660	33.7226	51.0841	33.9956	32.8415	126.584	132.711	76.1292	54.035	SH3BP5-AS1	1.2317	1.22962e-06	8.71425e-06
		ENSG00000179361	553.447	501.152	481.25	817.858	1411.1	1443.11	1098.65	1567.02	ARID3B	1.23267	1.23917e-18	4.82552e-17
		ENSG00000256683	149.768	147.087	147.668	175.861	367.3	367.83	452.297	310.161	ZNF350	1.23371	2.83044e-14	6.59292e-13
		ENSG00000185686	0.991841	0	2.12473	1.0594	9.33814	10.4497	0.746365	3.2421	PRAME	1.23444	0.0179778	0.0490902
		ENSG00000245522	13.8858	14.0922	16.9978	8.47522	41.5028	38.664	46.2746	20.5333	LOC440028	1.23507	0.000929402	0.00361055
		ENSG00000264063	0.991841	0	0	28.6039	1.03757	3.13492	2.98546	88.6174	MIR3687-2	1.23532	0.00618239	0.0194042
		ENSG00000260977	3.96737	0.88076	3.18709	6.35641	18.6763	12.5397	11.9418	4.3228		1.23558	0.00815864	0.0247666
		ENSG00000009694	1.98368	3.52304	1.06236	19.0692	15.5636	11.4947	5.22456	35.6631	TENM1	1.23618	0.00558431	0.0177582
		ENSG00000167994	36.6981	18.496	27.6214	29.6633	59.1416	90.9126	55.231	78.8911	RAB3IL1	1.23623	9.6069e-06	5.77382e-05
		ENSG00000100554	1190.21	1146.75	1134.6	968.293	3141.77	2763.95	2462.26	2203.55	ATP6V1D	1.23723	1.63556e-34	3.3395e-32
		ENSG00000230795	1.98368	2.64228	2.12473	3.17821	9.33814	6.26983	6.71729	10.807		1.23828	0.0095049	0.0282995
		ENSG00000175344	13.8858	2.64228	7.43654	13.7722	28.0144	39.7089	26.1228	12.9684	CHRNA7	1.23859	0.00181984	0.00659098
		ENSG00000166819	16.8613	25.542	21.2473	25.4256	81.9681	77.3279	32.0937	41.0666	PLIN1	1.23912	3.11294e-05	0.000168421
		ENSG00000105088	12.8939	9.68835	8.4989	9.53462	34.2398	41.7989	14.9273	22.6947	OLFM2	1.23922	0.000728228	0.00289794
		ENSG00000165659	18.845	17.6152	20.1849	30.7227	86.1184	93.0025	14.1809	61.5999		1.23924	0.00219483	0.00778096
		ENSG00000254180	0.991841	0.88076	0	0	3.11271	7.3148	5.22456	0		1.23971	0.0176949	0.0484402
		ENSG00000269910	1.98368	1.76152	2.12473	1.0594	13.4884	5.22486	5.22456	3.2421		1.23987	0.0111183	0.0323846
		ENSG00000188388	0	1.76152	2.12473	0	4.15028	6.26983	5.22456	4.3228		1.24055	0.0177092	0.0484736
		ENSG00000159917	138.858	157.656	138.107	173.742	438.893	429.483	356.016	258.287	ZNF235	1.24066	2.84004e-14	6.60849e-13
		ENSG00000153404	1.98368	3.52304	3.18709	1.0594	7.263	9.40475	14.9273	2.1614	PLEKHG4B	1.24161	0.00831267	0.0251735
		ENSG00000125971	417.565	415.719	431.319	4591.45	2590.82	2573.77	2945.16	4079.64	DYNLRB1	1.24224	0.0027095	0.00938674
		ENSG00000122203	3013.21	3141.67	2888.56	1365.57	7708.12	7594.86	4494.61	5297.59	KIAA1191	1.2424	3.88489e-09	4.23711e-08
		ENSG00000188316	7.93473	16.7344	14.8731	10.594	29.052	38.664	36.5719	25.9368	ENO4	1.24247	6.03747e-05	0.000305295
		ENSG00000188283	148.776	110.095	120.047	107	344.474	299.907	361.241	186.961	ZNF383	1.24307	4.94642e-15	1.29005e-13
		ENSG00000090612	295.569	347.9	331.457	229.89	688.947	666.692	808.313	695.971	ZNF268	1.2432	4.73949e-25	3.71681e-23
		ENSG00000250337	0	1.76152	0	0	4.15028	5.22486	7.46365	3.2421	LINC01021	1.24381	0.0168773	0.0464997
		ENSG00000198719	4.95921	7.04608	5.31181	29.6633	78.8554	114.947	11.1955	39.9859	DLL1	1.24679	0.016256	0.0450343
		ENSG00000144130	0.991841	0.88076	1.06236	3.17821	9.33814	3.13492	5.22456	8.6456	NT5DC4	1.24683	0.0162871	0.0450929
		ENSG00000174370	53.5594	47.561	35.058	15.891	89.2311	97.1824	111.955	71.3262	C11orf45	1.24741	4.13476e-06	2.65769e-05
		ENSG00000272769	22.8124	32.5881	23.372	13.7722	50.841	70.0131	60.4556	50.7929		1.24842	4.95418e-07	3.78562e-06
		ENSG00000108797	57.5268	47.561	28.6838	18.0098	100.644	120.172	108.223	58.3578	CNTNAP1	1.25127	1.60854e-05	9.25751e-05
		ENSG00000144199	195.393	175.271	191.225	185.395	596.603	571.6	363.48	329.614	FAHD2B	1.25217	7.25175e-10	8.91773e-09
		ENSG00000139679	160.678	158.537	175.29	222.474	576.89	509.946	322.43	373.922	LPAR6	1.25283	1.18038e-09	1.40063e-08
		ENSG00000181523	550.472	463.28	452.566	379.266	1276.21	1352.19	1202.39	704.617	SGSH	1.25286	1.40962e-22	8.40729e-21
		ENSG00000197580	2.97552	7.92684	9.56126	7.41581	19.7139	22.9894	20.8982	15.1298	BCO2	1.25489	0.000746675	0.00296379
		ENSG00000178184	20.8287	21.1382	20.1849	22.2474	66.4046	51.2036	45.5283	50.7929	PARD6G	1.25507	2.37081e-07	1.91285e-06
		ENSG00000267060	6.94289	8.8076	7.43654	9.53462	17.6387	21.9444	26.8691	22.6947	PTGES3L	1.25754	0.000585125	0.00237785
		ENSG00000058404	3.96737	0.88076	2.12473	1.0594	10.3757	8.35978	4.47819	8.6456	CAMK2B	1.25771	0.00973045	0.0288577
		ENSG00000147437	15.8695	31.7073	32.9332	26.485	74.7051	91.9575	61.9483	49.7122	GNRH1	1.25806	7.66025e-06	4.68968e-05
		ENSG00000147485	4.95921	1.76152	5.31181	2.1188	9.33814	13.5846	7.46365	15.1298	PXDNL	1.25841	0.00371098	0.0124123
		ENSG00000188785	181.507	204.336	189.101	182.217	534.349	457.698	494.094	357.712	ZNF548	1.25966	7.58811e-26	6.66578e-24
		ENSG00000260360	3.96737	0	2.12473	1.0594	8.30057	5.22486	5.22456	9.72631		1.26001	0.0110639	0.0322428
		ENSG00000242802	1346.92	1055.15	1089.98	1131.44	2950.85	3422.28	2642.13	2291.09	AP5Z1	1.26082	5.3308e-19	2.13082e-17
		ENSG00000256312	0	0.88076	0	2.1188	5.18786	3.13492	3.73183	9.72631		1.26119	0.0159884	0.0443853
		ENSG00000136436	727.02	680.827	725.594	1775.56	2262.94	2138.01	2378.67	2234.89	CALCOCO2	1.26123	4.33675e-11	6.42405e-10
		ENSG00000137094	60.5023	77.5068	69.0536	87.9304	190.913	206.904	162.708	168.589	DNAJB5	1.26193	2.6487e-10	3.48131e-09
		ENSG00000112186	92.2412	72.2223	80.7396	63.5641	170.162	170.33	282.872	145.895	CAP2	1.26254	4.0464e-09	4.40056e-08
		ENSG00000161277	111.086	87.1952	87.1137	177.98	297.783	319.761	188.83	309.08	THAP8	1.2627	1.44562e-10	1.98086e-09
		ENSG00000237781	0.991841	0.88076	3.18709	3.17821	5.18786	8.35978	7.46365	9.72631		1.26302	0.0114352	0.0332052
		ENSG00000186417	76.3718	85.4337	89.2385	60.3859	215.815	199.59	189.577	159.944	GLDN	1.26316	2.56773e-14	6.04938e-13
		ENSG00000183734	33.7226	32.5881	13.8107	176.92	131.772	146.296	82.8465	185.88	ASCL2	1.26355	0.000116235	0.000549397
		ENSG00000234776	3.96737	3.52304	8.4989	4.23761	8.30057	15.6746	20.1519	15.1298	C11orf94	1.26378	0.00374843	0.0125191
		ENSG00000263072	121.005	107.453	122.172	122.891	307.121	322.896	314.22	219.382		1.2644	6.99724e-20	3.0615e-18
		ENSG00000236345	100.176	106.572	94.5503	93.2274	270.806	261.243	234.359	205.333		1.265	1.5882e-16	4.94437e-15
		ENSG00000126752	4.95921	0.88076	1.06236	4.23761	18.6763	8.35978	3.73183	11.8877	SSX1	1.26602	0.012117	0.0349033
		ENSG00000250892	3.96737	5.28456	8.4989	5.29701	17.6387	13.5846	17.9128	16.2105		1.26647	0.00170726	0.00622445
		ENSG00000249825	0.991841	1.76152	1.06236	1.0594	9.33814	2.08994	3.73183	8.6456	CTD-2201I18.1	1.26787	0.011198	0.0325874
		ENSG00000164970	818.269	704.608	796.772	449.186	2355.29	2471.36	1115.07	1075.3	FAM219A	1.26822	3.60868e-08	3.34508e-07
		ENSG00000113108	178.531	168.225	178.477	169.504	546.8	593.544	363.48	265.852	APBB3	1.26832	3.86284e-12	6.76042e-11
		ENSG00000198157	182.499	268.632	209.285	503.216	606.979	589.364	625.454	932.645	HMGN5	1.2684	6.20029e-14	1.3723e-12
		ENSG00000137710	1278.48	1235.71	1215.34	1350.74	2861.62	2667.81	3711.67	3109.18	RDX	1.26921	7.63989e-31	1.07261e-28
		ENSG00000108950	6.94289	4.4038	5.31181	4.23761	16.6011	16.7196	11.1955	17.2912	FAM20A	1.26967	0.00162439	0.00594657
		ENSG00000176601	3.96737	6.16532	5.31181	2.1188	15.5636	14.6296	14.1809	8.6456	MAP3K19	1.26998	0.00331177	0.0112178
		ENSG00000234322	3.96737	1.76152	0	37.0791	15.5636	7.3148	6.71729	79.9718		1.27039	0.00168551	0.00615142
		ENSG00000167118	2025.34	1989.64	1858.07	1473.63	4920.16	5126.63	4620.75	3279.93	URM1	1.27299	4.37442e-59	4.72105e-56
		ENSG00000169826	328.299	291.531	373.952	315.702	918.251	900.766	754.575	644.098	CSGALNACT2	1.27311	7.42618e-23	4.54884e-21
		ENSG00000270270	0.991841	0.88076	0	1.0594	7.263	4.17989	2.98546	3.2421		1.27371	0.0147866	0.0414757
		ENSG00000238311	0	0.88076	0	0	2.07514	2.08994	5.22456	4.3228		1.27405	0.0135682	0.0384964
		ENSG00000215704	3.96737	1.76152	0	2.1188	8.30057	11.4947	5.97092	5.4035	CELA2B	1.27506	0.00890096	0.0267335
		ENSG00000140104	304.495	301.22	303.836	265.91	934.852	909.126	656.055	463.621	C14orf79	1.27523	3.11095e-15	8.34396e-14
		ENSG00000132510	1014.65	924.798	899.821	1757.55	2854.36	3131.78	2139.83	2799.01	KDM6B	1.2759	5.17427e-16	1.52232e-14
		ENSG00000247121	7.93473	4.4038	7.43654	12.7128	18.6763	24.0344	23.1373	21.614		1.27607	0.00028744	0.00125087
		ENSG00000257108	4.95921	6.16532	8.4989	8.47522	36.315	28.2142	14.1809	12.9684	NHLRC4	1.2785	0.00244889	0.00857927
		ENSG00000171130	660.566	610.366	587.486	1290.35	2248.42	2423.29	1602.45	1651.31	ATP6V0E2	1.2787	3.66522e-07	2.87037e-06
		ENSG00000143156	333.259	348.781	332.519	318.88	855.996	833.888	677.699	926.16	NME7	1.27903	7.5787e-25	5.8225e-23
		ENSG00000231966	2.97552	6.16532	7.43654	3.17821	14.526	25.0793	11.1955	10.807		1.28297	0.00148395	0.00548559
		ENSG00000204920	50.5839	51.0841	65.8665	44.4949	158.748	140.026	127.628	104.828	ZNF155	1.28387	5.67946e-13	1.10774e-11
		ENSG00000105792	216.221	216.667	225.221	127.128	650.557	594.589	464.985	274.498	CFAP69	1.28511	1.87696e-14	4.48728e-13
		ENSG00000255495	2.97552	0	7.43654	2.1188	22.8266	7.3148	9.70275	6.4842		1.28528	0.00880365	0.0264818
		ENSG00000234801	12.8939	22.019	15.9354	70.9799	64.3294	47.0237	42.5428	140.491		1.28672	1.8185e-07	1.49545e-06
		ENSG00000261924	3.96737	1.76152	8.4989	1.0594	15.5636	10.4497	7.46365	17.2912		1.287	0.00381468	0.0127104
		ENSG00000271755	2.97552	0.88076	0	2.1188	9.33814	8.35978	3.73183	5.4035		1.28735	0.00796016	0.0242355
		ENSG00000100314	4.95921	13.2114	4.24945	6.35641	34.2398	37.619	15.6737	12.9684	CABP7	1.28743	0.00501888	0.0161505
		ENSG00000169507	211.262	307.385	314.459	441.771	1227.45	1374.14	488.123	603.031	SLC38A11	1.28874	0.000275965	0.00120673
		ENSG00000174564	29.7552	36.9919	47.8063	30.7227	78.8554	89.8676	129.121	73.4876	IL20RB	1.28898	3.40348e-08	3.16782e-07
		ENSG00000232150	2.97552	4.4038	1.06236	11.6534	13.4884	13.5846	14.9273	19.4526		1.29046	0.00417071	0.0137411
		ENSG00000139364	0.991841	0.88076	0	3.17821	6.22543	13.5846	2.98546	3.2421	TMEM132B	1.29048	0.00742248	0.0228347
		ENSG00000172940	5.95105	7.92684	7.43654	5.29701	32.1647	17.7645	15.6737	12.9684	SLC22A13	1.29063	0.000949623	0.0036828
		ENSG00000102032	4.95921	7.04608	16.9978	9.53462	53.9537	55.3835	5.22456	21.614	RENBP	1.29084	0.00587239	0.0185313
		ENSG00000152439	220.189	175.271	210.348	154.673	537.462	488.002	613.512	287.466	ZNF773	1.29248	3.40966e-18	1.2773e-16
		ENSG00000258479	0	0.88076	0	0	4.15028	3.13492	2.2391	3.2421	LINC00640	1.29311	0.0129558	0.0370046
		ENSG00000250075	0	0	0	0	4.15028	5.22486	0.746365	2.1614	LOC101927237	1.29396	0.0128414	0.0367147
		ENSG00000079263	1.98368	0	3.18709	5.29701	8.30057	7.3148	5.22456	16.2105	SP140	1.29462	0.0088124	0.0265027
		ENSG00000125148	597.088	458.876	420.696	851.759	1575.03	1650.01	1223.29	1358.44	MT2A	1.29478	1.43811e-10	1.97296e-09
		ENSG00000197870	5.95105	4.4038	7.43654	11.6534	10.3757	22.9894	25.3764	27.0175	PRB3	1.29522	0.00123253	0.00466034
		ENSG00000267767	2.97552	3.52304	2.12473	0	6.22543	9.40475	6.71729	10.807	LOC400685	1.29551	0.00696323	0.02158
		ENSG00000269300	0	0.88076	0	1.0594	5.18786	6.26983	4.47819	1.0807		1.29621	0.0127014	0.0363695
		ENSG00000099994	13.8858	11.4499	19.1225	23.3068	73.6676	60.6084	20.8982	33.5017	SUSD2	1.29621	0.000219037	0.000975871
		ENSG00000272593	45.6247	67.8185	63.7418	28.6039	153.561	156.746	144.048	70.2455		1.2965	1.26353e-11	2.03385e-10
		ENSG00000163793	0.991841	0.88076	0	0	3.11271	3.13492	9.70275	2.1614	DNAJC5G	1.29728	0.0126999	0.0363695
		ENSG00000239906	6.94289	4.4038	1.06236	2.1188	16.6011	24.0344	6.71729	5.4035		1.29868	0.00533437	0.0170466
		ENSG00000136931	0	1.76152	3.18709	12.7128	23.8641	22.9894	4.47819	10.807	NR5A1	1.29885	0.00682275	0.0211878
		ENSG00000139292	291.601	381.369	320.833	666.364	1791.89	1635.38	416.472	969.388	LGR5	1.299	0.00061458	0.00248507
		ENSG00000272848	0.991841	0	0	2.1188	3.11271	6.26983	8.95638	3.2421		1.30005	0.0130307	0.037195
		ENSG00000131471	34.7144	37.8727	44.6192	32.8415	115.17	127.487	88.0711	61.5999	AOC3	1.30077	1.31197e-08	1.30243e-07
		ENSG00000089101	2.97552	2.64228	4.24945	1.0594	17.6387	2.08994	17.1664	5.4035	CFAP61	1.30119	0.00740907	0.0227996
		ENSG00000197757	165.638	162.941	118.985	632.463	605.942	607.129	459.014	724.069	HOXC6	1.30157	7.24567e-07	5.35603e-06
		ENSG00000114670	68.4371	68.6992	58.4299	45.5543	170.162	166.151	164.947	122.119	NEK11	1.30171	5.36066e-09	5.73085e-08
		ENSG00000228470	2.97552	3.52304	1.06236	2.1188	5.18786	11.4947	5.97092	14.0491		1.30384	0.00591307	0.0186415
		ENSG00000176222	1.98368	0.88076	0	3.17821	2.07514	4.17989	10.4491	11.8877	ZNF404	1.30414	0.0116611	0.0337574
		ENSG00000255040	4.95921	11.4499	7.43654	50.8513	28.0144	26.1243	22.391	116.716		1.30657	3.43431e-05	0.000183856
		ENSG00000105146	32.7308	22.8997	24.4343	19.0692	68.4797	76.283	50.0065	67.0034	AURKC	1.30675	9.4431e-08	8.13758e-07
		ENSG00000188130	357.063	295.054	364.39	153.613	971.167	877.776	744.126	380.407	MAPK12	1.30783	3.80621e-16	1.12911e-14
		ENSG00000227698	0.991841	0	1.06236	2.1188	3.11271	5.22486	11.9418	2.1614		1.30783	0.0115312	0.0334114
		ENSG00000126882	69.4289	58.1301	73.303	168.445	306.084	323.941	123.897	189.123	FAM78A	1.30802	7.57393e-06	4.64311e-05
		ENSG00000203288	4.95921	13.2114	13.8107	24.3662	45.6531	33.4391	41.0501	35.6631		1.30896	0.000505917	0.0020874
		ENSG00000164039	101.168	73.103	73.303	82.6334	337.211	306.177	118.672	158.863	BDH2	1.3092	2.26421e-05	0.000126053
		ENSG00000110987	382.851	369.038	334.644	759.591	1198.39	1143.2	1008.34	1165	BCL7A	1.30957	2.56317e-14	6.04491e-13
		ENSG00000156232	450.296	421.003	401.573	801.967	1152.74	1098.27	1707.68	1198.5	WHAMM	1.3097	6.76974e-11	9.74155e-10
		ENSG00000160716	0.991841	3.52304	3.18709	1.0594	5.18786	13.5846	11.9418	3.2421	CHRNB2	1.31177	0.0078345	0.0239236
		ENSG00000105136	227.132	229.878	275.152	184.336	673.384	609.219	731.438	342.582	ZNF419	1.31223	4.91941e-24	3.44116e-22
		ENSG00000088543	15.8695	20.2575	15.9354	20.1286	56.0288	78.3729	23.8837	45.3894	C3orf18	1.31323	0.000129972	0.000606984
		ENSG00000236882	0	0	0	1.0594	4.15028	4.17989	4.47819	1.0807	LINC01554	1.31482	0.0117252	0.0339257
		ENSG00000121417	224.156	236.924	244.343	221.415	778.178	647.883	541.115	431.2	ZNF211	1.31798	1.21864e-14	3.00864e-13
		ENSG00000087077	344.169	306.504	345.268	228.831	783.366	933.16	898.623	524.14	TRIP6	1.31942	3.03081e-19	1.25119e-17
		ENSG00000102104	0.991841	1.76152	1.06236	1.0594	4.15028	10.4497	6.71729	2.1614	RS1	1.32039	0.0115391	0.0334213
		ENSG00000234393	10.9103	8.8076	9.56126	13.7722	32.1647	20.8994	52.2456	18.3719		1.3208	0.000361243	0.00153895
		ENSG00000178750	34.7144	44.9187	49.931	83.6928	94.419	82.5528	258.242	146.975	STX19	1.32394	4.53138e-05	0.00023607
		ENSG00000137496	349.128	386.653	398.386	357.018	1073.89	1009.44	993.412	725.15	IL18BP	1.32417	3.35491e-27	3.36441e-25
		ENSG00000162643	4.95921	0.88076	3.18709	4.23761	12.4509	17.7645	11.1955	5.4035	WDR63	1.32436	0.004311	0.0141334
		ENSG00000225595	0	0	2.12473	1.0594	5.18786	4.17989	8.21002	4.3228	LINC01623	1.32441	0.0114255	0.0331814
		ENSG00000239388	5.95105	12.3306	10.6236	12.7128	32.1647	34.4841	30.601	20.5333	ASB14	1.32549	6.02288e-05	0.000304825
		ENSG00000170581	770.661	742.48	713.908	1015.97	2302.37	2116.07	1981.6	1798.29	STAT2	1.32638	2.3638e-22	1.38432e-20
		ENSG00000248144	88.2739	212.263	101.987	586.909	1780.47	1791.08	120.165	891.578	ADH1C	1.32702	0.00809126	0.0245818
[truncated: 451 more rows]

## Sheet: HCT116
		Ensembl gene id	Ensembl biotype	Ensembl gene	baseMean	baseMeanA shCTRL	baseMeanB shTGM2-1	log2FoldChange shTGM2-1/shCTRL	pvalue	padj
		ENSG00000072506	protein_coding	HSD17B10	303.215	116.022	490.407	2.07014	3.92153e-106	4.40258e-103
		ENSG00000261204	lncRNA	AC004449.1	8.18221	3.73217	12.6322	1.52645	0.00098296	0.00465496
		ENSG00000101222	protein_coding	SPEF1	13.1633	6.76077	19.5659	1.40598	0.000176737	0.00101962
		ENSG00000160345	protein_coding	C9orf116	28.434	15.7318	41.1362	1.33247	4.49904e-07	4.69268e-06
		ENSG00000105520	protein_coding	PLPPR2	121.651	69.0448	174.258	1.32313	9.34892e-24	5.6027e-22
		ENSG00000043039	protein_coding	BARX2	12.2887	6.81184	17.7655	1.26435	0.000730725	0.00358028
		ENSG00000185338	protein_coding	SOCS1	31.9734	18.8375	45.1093	1.21683	1.49637e-06	1.3876e-05
		ENSG00000084764	protein_coding	MAPRE3	151.454	91.6228	211.285	1.19656	9.4102e-22	5.03072e-20
		ENSG00000257181	lncRNA	AC025423.4	11.83	6.82502	16.835	1.18854	0.00201559	0.00861047
		ENSG00000166402	protein_coding	TUB	9.92265	5.70289	14.1424	1.17574	0.00741885	0.0260876
		ENSG00000183741	protein_coding	CBX6	1836.95	1129.61	2544.29	1.17073	7.5232e-157	2.11151e-153
		ENSG00000204103	protein_coding	MAFB	14.0455	8.26747	19.8235	1.16797	0.00111244	0.00518646
		ENSG00000278189	rRNA	RNA5-8SN1	8.93423	5.21095	12.6575	1.13681	0.0114708	0.0377504
		ENSG00000135679	protein_coding	MDM2	6225.16	3904.75	8545.58	1.12975	2.55628e-174	1.07619e-170
		ENSG00000233170	processed_pseudogene	AC138356.2	13.3353	8.03612	18.6345	1.11961	0.00251624	0.0104208
		ENSG00000224786	transcribed_unitary_pseudogene	CETN4P	20.4168	12.6535	28.1801	1.09572	0.000405522	0.00213417
		ENSG00000100228	protein_coding	RAB36	111.045	70.8788	151.211	1.08244	1.01713e-15	3.43254e-14
		ENSG00000143333	protein_coding	RGS16	94.8162	60.6653	128.967	1.07561	1.10871e-12	2.68644e-11
		ENSG00000186575	protein_coding	NF2	1559.65	1007.1	2112.2	1.06779	9.02082e-134	1.6879e-130
		ENSG00000268149	lncRNA	AC010336.4	16.2388	10.1513	22.3263	1.06475	0.00108137	0.00506543
		ENSG00000269896	transcribed_processed_pseudogene	AL513477.1	16.5417	10.4977	22.5857	1.03657	0.00146074	0.00655969
		ENSG00000213965	protein_coding	NUDT19	272.58	178.331	366.829	1.03641	7.34045e-30	6.43819e-28
		ENSG00000158604	protein_coding	TMED4	667.539	437.342	897.735	1.03584	5.4581e-62	1.58473e-59
		ENSG00000162814	protein_coding	SPATA17	35.8768	23.2315	48.5222	1.03119	2.88463e-05	0.000202742
		ENSG00000267475	lncRNA	AC008736.1	15.6086	9.97443	21.2428	1.01919	0.00344722	0.0136079
		ENSG00000284753	protein_coding	EEF1AKMT4	19.4685	12.5745	26.3626	1.01131	0.000896862	0.00430167
		ENSG00000161714	protein_coding	PLCD3	779.634	517.438	1041.83	1.00826	3.6761e-62	1.10546e-59
		ENSG00000159388	protein_coding	BTG2	1115.99	741.365	1490.61	1.00667	9.81889e-88	6.614e-85
		ENSG00000135312	protein_coding	HTR1B	14.92	9.61011	20.2299	1.00066	0.00426816	0.0163095
		ENSG00000125971	protein_coding	DYNLRB1	43.7306	28.9648	58.4963	0.989532	2.89828e-06	2.51453e-05
		ENSG00000163884	protein_coding	KLF15	23.458	15.4138	31.5023	0.985631	0.000426056	0.00222612
		ENSG00000188486	protein_coding	H2AX	1059.22	711.895	1406.55	0.981422	2.67912e-87	1.73524e-84
		ENSG00000165698	protein_coding	SPACA9	16.1813	10.6045	21.7581	0.971693	0.00311321	0.012444
		ENSG00000079313	protein_coding	REXO1	510.567	344.842	676.291	0.969662	2.83747e-48	5.4923e-46
		ENSG00000130522	protein_coding	JUND	976.22	659.751	1292.69	0.969312	1.51004e-62	4.7091e-60
		ENSG00000264462	miRNA	MIR3648-2	13.8197	9.04104	18.5983	0.964819	0.00832123	0.0288095
		ENSG00000158050	protein_coding	DUSP2	102.839	69.6082	136.07	0.957	7.02044e-12	1.54139e-10
		ENSG00000286830	lncRNA	AC105052.5	15.5443	10.28	20.8087	0.951131	0.00464122	0.0174811
		ENSG00000075618	protein_coding	FSCN1	1286.69	877.665	1695.71	0.949355	2.01007e-82	1.25369e-79
		ENSG00000124702	protein_coding	KLHDC3	494.316	337.206	651.426	0.947913	4.635e-45	8.13056e-43
		ENSG00000175414	protein_coding	ARL10	15.2207	10.1092	20.3321	0.941279	0.00674033	0.0240634
		ENSG00000176401	protein_coding	EID2B	46.5177	31.5539	61.4815	0.9406	3.54482e-06	3.01184e-05
		ENSG00000204516	protein_coding	MICB	549.687	376.971	722.403	0.936525	3.28655e-47	6.08193e-45
		ENSG00000187624	protein_coding	C17orf97	40.0083	27.202	52.8145	0.932196	2.31674e-05	0.000165383
		ENSG00000110047	protein_coding	EHD1	838.404	578.077	1098.73	0.925325	2.54713e-56	6.40204e-54
		ENSG00000279865	TEC	AC006511.3	11.8583	7.87155	15.845	0.925063	0.0159966	0.0496284
		ENSG00000100294	protein_coding	MCAT	142.604	98.5918	186.617	0.91369	9.62133e-15	2.91409e-13
		ENSG00000160683	protein_coding	CXCR5	42.8105	29.4798	56.1412	0.906679	2.36793e-05	0.000168751
		ENSG00000185621	protein_coding	LMLN	188.639	132.176	245.102	0.885923	1.33393e-16	4.81016e-15
		ENSG00000116017	protein_coding	ARID3A	426.171	298.999	553.343	0.885822	2.74732e-35	3.377e-33
		ENSG00000169955	protein_coding	ZNF747	22.7184	15.7308	29.7061	0.876018	0.00200863	0.00858945
		ENSG00000116885	protein_coding	OSCP1	36.4243	25.4109	47.4376	0.874993	0.000187706	0.00107516
		ENSG00000154479	protein_coding	CCDC173	23.8647	16.5733	31.1561	0.871706	0.00152624	0.00679946
		ENSG00000108821	protein_coding	COL1A1	184.037	129.815	238.26	0.871054	7.01461e-17	2.59048e-15
		ENSG00000142459	protein_coding	EVI5L	90.3967	64.0235	116.77	0.856936	2.5933e-08	3.40383e-07
		ENSG00000186174	protein_coding	BCL9L	2418.55	1724.96	3112.15	0.850971	9.09596e-75	4.37646e-72
		ENSG00000123643	protein_coding	SLC36A1	222.993	158.915	287.072	0.849126	8.33414e-19	3.58944e-17
		ENSG00000168159	protein_coding	RNF187	1028.49	735.5	1321.48	0.844492	3.51778e-59	9.55475e-57
		ENSG00000264364	protein_coding	DYNLL2	1341.66	959.668	1723.65	0.844194	7.29914e-65	2.41015e-62
		ENSG00000100647	protein_coding	SUSD6	341.835	245.146	438.523	0.836422	5.02571e-23	2.87867e-21
		ENSG00000024422	protein_coding	EHD2	933.831	671.033	1196.63	0.833579	1.78432e-42	2.83471e-40
		ENSG00000167011	protein_coding	NAT16	16.2106	11.4129	21.0082	0.826199	0.0104332	0.0349227
		ENSG00000140104	protein_coding	CLBA1	118.586	85.436	151.737	0.821342	1.65972e-09	2.62193e-08
		ENSG00000088727	protein_coding	KIF9	137.907	99.4191	176.395	0.820934	5.75407e-12	1.26997e-10
		ENSG00000163739	protein_coding	CXCL1	19.9819	14.2064	25.7574	0.815257	0.00556825	0.020505
		ENSG00000230453	protein_coding	ANKRD18B	47.3545	34.1083	60.6007	0.811135	7.00845e-05	0.000446301
		ENSG00000170396	protein_coding	ZNF804A	413.437	300.036	526.839	0.81016	9.78501e-26	6.67124e-24
		ENSG00000130311	protein_coding	DDA1	229.611	166.626	292.596	0.808587	2.05579e-16	7.28832e-15
		ENSG00000116741	protein_coding	RGS2	674.386	491.056	857.716	0.80336	1.29299e-10	2.40331e-09
		ENSG00000157578	protein_coding	LCA5L	46.3503	33.5773	59.1233	0.7981	6.6652e-05	0.000427752
		ENSG00000171130	protein_coding	ATP6V0E2	126.317	92.0158	160.618	0.79704	2.54274e-10	4.50733e-09
		ENSG00000161642	protein_coding	ZNF385A	208.5	152.334	264.667	0.792942	4.69957e-15	1.48204e-13
		ENSG00000130734	protein_coding	ATG4D	133.335	97.3593	169.31	0.792029	1.51958e-10	2.79364e-09
		ENSG00000175221	protein_coding	MED16	497.983	365.722	630.245	0.783515	1.60683e-28	1.30091e-26
		ENSG00000269904	transcribed_processed_pseudogene	MAP2K4P1	47.5993	34.7234	60.4751	0.783134	7.74961e-05	0.000488411
		ENSG00000078902	protein_coding	TOLLIP	318.925	234.477	403.373	0.780103	1.05706e-20	5.18976e-19
		ENSG00000125740	protein_coding	FOSB	96.6052	70.8723	122.338	0.779113	9.19933e-08	1.09792e-06
		ENSG00000188322	protein_coding	SBK1	270.217	198.789	341.644	0.778234	4.90811e-18	1.98208e-16
		ENSG00000155254	protein_coding	MARVELD1	359.716	265.266	454.166	0.773521	2.77164e-23	1.60393e-21
		ENSG00000126003	protein_coding	PLAGL2	596.502	440.454	752.55	0.771441	9.60126e-31	8.98251e-29
		ENSG00000275004	protein_coding	ZNF280B	448.2	330.983	565.418	0.77076	3.19548e-26	2.27055e-24
		ENSG00000137494	protein_coding	ANKRD42	208.075	153.875	262.275	0.765466	2.61473e-14	7.56565e-13
		ENSG00000188010	protein_coding	MORN2	69.5872	51.3737	87.8006	0.761725	6.2195e-06	5.01371e-05
		ENSG00000257698	lncRNA	GIHCG	37.4072	27.5753	47.2392	0.755435	0.000584237	0.00293951
		ENSG00000130766	protein_coding	SESN2	285.719	212.468	358.969	0.753851	9.98441e-19	4.26745e-17
		ENSG00000172794	protein_coding	RAB37	42.2774	31.2298	53.325	0.753219	0.000309819	0.0016803
		ENSG00000140406	protein_coding	TLNRD1	487.033	362.828	611.238	0.750833	4.7948e-29	4.03723e-27
		ENSG00000178531	protein_coding	CTXN1	82.4933	61.2642	103.722	0.750095	1.21509e-06	1.15211e-05
		ENSG00000181826	protein_coding	RELL1	469.89	350.41	589.37	0.748464	9.53605e-27	7.01254e-25
		ENSG00000157600	protein_coding	TMEM164	192.874	143.762	241.986	0.74719	7.88024e-13	1.96597e-11
		ENSG00000105792	protein_coding	CFAP69	51.5558	38.2556	64.856	0.746416	0.000140659	0.000829959
		ENSG00000116106	protein_coding	EPHA4	45.6566	33.9399	57.3732	0.740432	0.000563301	0.0028495
		ENSG00000008838	protein_coding	MED24	1355.29	1016.04	1694.54	0.737368	2.06369e-51	4.39905e-49
		ENSG00000168811	protein_coding	IL12A	80.7934	60.335	101.252	0.737343	1.20474e-05	9.12274e-05
		ENSG00000105327	protein_coding	BBC3	280.6	210.453	350.746	0.734199	8.23792e-18	3.26415e-16
		ENSG00000154319	protein_coding	FAM167A	71.0887	53.1626	89.0149	0.732867	1.85091e-05	0.000135166
		ENSG00000164897	protein_coding	TMUB1	312.508	234.562	390.455	0.732736	4.23411e-19	1.87145e-17
		ENSG00000156345	protein_coding	CDK20	104.136	78.0657	130.207	0.730723	1.74911e-07	1.9835e-06
		ENSG00000107864	protein_coding	CPEB3	164.588	123.533	205.643	0.73061	2.56635e-11	5.24483e-10
		ENSG00000139645	protein_coding	ANKRD52	1285.67	966.919	1604.42	0.729995	3.92685e-58	1.03325e-55
		ENSG00000172901	protein_coding	LVRN	62.2238	46.5973	77.8504	0.728238	4.45104e-05	0.000297797
		ENSG00000080823	protein_coding	MOK	187.66	141.48	233.839	0.720911	8.76191e-12	1.91128e-10
		ENSG00000169515	protein_coding	CCDC8	25.9384	19.3706	32.5063	0.717944	0.00725248	0.0256364
		ENSG00000198435	protein_coding	NRARP	121.75	91.9211	151.579	0.715477	2.0347e-08	2.72371e-07
		ENSG00000230733	lncRNA	AC092171.2	53.664	40.4519	66.8761	0.711467	0.000185788	0.00106671
		ENSG00000164938	protein_coding	TP53INP1	472.652	358.241	587.063	0.711016	8.6806e-24	5.23947e-22
		ENSG00000123364	protein_coding	HOXC13	31.4627	23.6402	39.2851	0.709233	0.00263078	0.0108186
		ENSG00000170469	protein_coding	SPATA24	34.1619	25.7051	42.6187	0.707831	0.00260044	0.0107122
		ENSG00000148730	protein_coding	EIF4EBP2	1683.75	1279.24	2088.25	0.706565	5.69134e-53	1.26108e-50
		ENSG00000132510	protein_coding	KDM6B	764.207	580.601	947.813	0.706095	2.02359e-32	2.09063e-30
		ENSG00000248008	lncRNA	NRAV	444.696	337.779	551.613	0.705926	2.21677e-23	1.29171e-21
		ENSG00000156232	protein_coding	WHAMM	477.653	363.342	591.964	0.702651	1.71426e-25	1.13654e-23
		ENSG00000175220	protein_coding	ARHGAP1	369.589	281.261	457.918	0.70121	1.81268e-19	8.31759e-18
		ENSG00000181004	protein_coding	BBS12	104.121	79.0915	129.151	0.700462	6.35134e-07	6.38928e-06
		ENSG00000230513	lncRNA	THAP7-AS1	25.2183	18.9913	31.4454	0.698643	0.0108672	0.036078
		ENSG00000085982	protein_coding	USP40	602.851	460.333	745.369	0.69408	1.09049e-26	7.98428e-25
		ENSG00000158062	protein_coding	UBXN11	233.819	178.477	289.161	0.693052	6.72313e-14	1.86213e-12
		ENSG00000174307	protein_coding	PHLDA3	352.662	269.641	435.684	0.690211	3.87407e-18	1.56825e-16
		ENSG00000116863	protein_coding	ADPRS	197.189	150.876	243.502	0.686957	3.1255e-10	5.48265e-09
		ENSG00000076984	protein_coding	MAP2K7	1055.32	809.807	1300.83	0.68311	5.94374e-36	7.58277e-34
		ENSG00000218283	processed_pseudogene	MORF4L1P1	253.377	194.463	312.29	0.680608	3.62421e-05	0.000249109
		ENSG00000232388	protein_coding	SMIM26	52.4356	40.0674	64.8039	0.680181	0.000329621	0.00177512
		ENSG00000124762	protein_coding	CDKN1A	4992.19	3839.54	6144.83	0.678296	1.88754e-50	3.97327e-48
		ENSG00000136048	protein_coding	DRAM1	333.754	256.539	410.97	0.677746	4.38776e-17	1.64895e-15
		ENSG00000124380	protein_coding	SNRNP27	719.171	553.888	884.454	0.674221	2.46727e-28	1.96914e-26
		ENSG00000262712	lncRNA	AC012676.1	35.6406	27.2611	44.0201	0.671754	0.002474	0.0102717
		ENSG00000102781	protein_coding	KATNAL1	1056.84	815.391	1298.29	0.670389	1.74423e-42	2.79741e-40
		ENSG00000117318	protein_coding	ID3	139.668	107.624	171.712	0.669026	4.95646e-08	6.2011e-07
		ENSG00000271576	lncRNA	AL359504.1	45.7965	35.2086	56.3844	0.664326	0.00202083	0.00862411
		ENSG00000167378	protein_coding	IRGQ	862.113	666.842	1057.38	0.664286	1.47726e-32	1.53562e-30
		ENSG00000205155	protein_coding	PSENEN	36.0856	27.7081	44.4631	0.663238	0.00367733	0.014368
		ENSG00000162772	protein_coding	ATF3	1062.88	823.778	1301.98	0.659741	3.8396e-12	8.6674e-11
		ENSG00000120337	protein_coding	TNFSF18	28.8106	22.1363	35.4848	0.657139	0.0142649	0.0452736
		ENSG00000161888	protein_coding	SPC24	217.084	168.37	265.798	0.655566	1.41878e-10	2.62264e-09
		ENSG00000112981	protein_coding	NME5	47.387	36.596	58.178	0.654481	0.00117968	0.00545015
		ENSG00000007376	protein_coding	RPUSD1	378.168	293.805	462.53	0.652901	2.95952e-15	9.45698e-14
		ENSG00000133640	protein_coding	LRRIQ1	72.0235	55.8146	88.2325	0.651307	4.48876e-05	0.000300082
		ENSG00000250479	protein_coding	CHCHD10	335.675	261.174	410.175	0.649228	5.36407e-17	1.99847e-15
		ENSG00000197885	protein_coding	NKIRAS1	350.036	272.715	427.356	0.646138	1.64522e-16	5.8698e-15
		ENSG00000174684	protein_coding	B4GAT1	50.1109	38.8601	61.3617	0.645717	0.000667671	0.00330402
		ENSG00000269473	lncRNA	AC012313.8	58.7104	45.5754	71.8453	0.645268	0.000376794	0.00200065
		ENSG00000166963	protein_coding	MAP1A	254.685	198.748	310.621	0.641614	9.08444e-10	1.49689e-08
		ENSG00000231925	protein_coding	TAPBP	679.921	531.664	828.178	0.638456	1.39549e-24	8.73605e-23
		ENSG00000052344	protein_coding	PRSS8	135.417	105.731	165.104	0.638106	1.38971e-07	1.61193e-06
		ENSG00000100034	protein_coding	PPM1F	600.19	469.599	730.781	0.636911	1.06682e-22	5.9685e-21
		ENSG00000184675	protein_coding	AMER1	289.657	226.805	352.51	0.633952	3.11393e-13	8.10489e-12
		ENSG00000104228	protein_coding	TRIM35	697.43	547.998	846.861	0.627026	2.68302e-27	2.04444e-25
		ENSG00000196976	protein_coding	LAGE3	53.3176	41.7195	64.9158	0.625731	0.00125398	0.005743
		ENSG00000133135	protein_coding	RNF128	225.176	176.913	273.44	0.625322	2.71488e-10	4.79733e-09
		ENSG00000011009	protein_coding	LYPLA2	425.143	334.336	515.951	0.624417	8.35305e-17	3.0447e-15
		ENSG00000167703	protein_coding	SLC43A2	169.18	132.972	205.388	0.623424	1.00033e-08	1.40731e-07
		ENSG00000008256	protein_coding	CYTH3	444.573	349.777	539.37	0.623394	1.37348e-18	5.84076e-17
		ENSG00000161021	protein_coding	MAML1	1215.83	957.336	1474.33	0.622437	7.47492e-37	9.75796e-35
		ENSG00000167470	protein_coding	MIDN	774.558	610.109	939.006	0.621238	7.85328e-29	6.41986e-27
		ENSG00000150773	protein_coding	PIH1D2	39.8198	31.2169	48.4227	0.617354	0.00430181	0.0164214
		ENSG00000187860	protein_coding	CCDC157	36.1709	28.3431	43.9987	0.616862	0.00544566	0.0200931
		ENSG00000106366	protein_coding	SERPINE1	659.821	520.804	798.839	0.616201	9.21516e-19	3.94869e-17
		ENSG00000197021	protein_coding	EOLA2	145.355	114.611	176.099	0.615278	9.64263e-08	1.14677e-06
		ENSG00000143674	protein_coding	MAP3K21	726.604	574.366	878.841	0.612763	1.98687e-25	1.31211e-23
		ENSG00000130590	protein_coding	SAMD10	28.1601	22.0762	34.2439	0.61097	0.015295	0.0478752
		ENSG00000140718	protein_coding	FTO	834.292	660.4	1008.18	0.609596	5.02249e-29	4.18706e-27
		ENSG00000136436	protein_coding	CALCOCO2	1253.45	992.864	1514.04	0.608238	2.96548e-39	4.16156e-37
		ENSG00000068120	protein_coding	COASY	632.717	501.274	764.16	0.607287	8.36982e-23	4.71397e-21
		ENSG00000165617	protein_coding	DACT1	175.941	139.294	212.588	0.606376	4.77423e-08	5.99985e-07
		ENSG00000002330	protein_coding	BAD	161.575	127.997	195.154	0.60465	5.86111e-08	7.27884e-07
		ENSG00000253276	protein_coding	CCDC71L	130.256	103.18	157.331	0.603864	3.20449e-06	2.75888e-05
		ENSG00000214022	protein_coding	REPIN1	877.622	696.612	1058.63	0.603068	5.2999e-30	4.69738e-28
		ENSG00000181026	protein_coding	AEN	1204.88	957.478	1452.27	0.60049	1.23016e-37	1.63118e-35
		ENSG00000126461	protein_coding	SCAF1	1929.97	1534.93	2325.01	0.598743	1.05599e-48	2.0921e-46
		ENSG00000174567	protein_coding	GOLT1A	29.0057	22.8677	35.1437	0.598689	0.0144635	0.0457916
		ENSG00000185950	protein_coding	IRS2	262.36	208.561	316.16	0.597837	3.06446e-11	6.21005e-10
		ENSG00000179611	processed_pseudogene	DGKZP1	51.5408	40.8554	62.2263	0.595113	0.00236388	0.00989996
		ENSG00000164933	protein_coding	SLC25A32	146.71	116.671	176.75	0.595087	3.15085e-07	3.40566e-06
		ENSG00000278133	lncRNA	AC135050.6	55.37	43.9158	66.8242	0.594578	0.00110906	0.00517502
		ENSG00000162643	protein_coding	WDR63	140.78	111.99	169.569	0.594158	2.29842e-06	2.04682e-05
		ENSG00000004961	protein_coding	HCCS	477.403	380.532	574.273	0.592441	7.78209e-19	3.37759e-17
		ENSG00000212724	protein_coding	KRTAP2-3	83.3165	66.3502	100.283	0.588633	0.000184333	0.00105981
		ENSG00000140450	protein_coding	ARRDC4	127.592	101.721	153.464	0.588531	2.79755e-06	2.43466e-05
		ENSG00000099994	protein_coding	SUSD2	50.0027	39.7506	60.2549	0.588005	0.00475732	0.0178506
		ENSG00000181085	protein_coding	MAPK15	179.584	143.541	215.628	0.583738	3.52828e-08	4.51491e-07
		ENSG00000167065	protein_coding	DUSP18	135.934	108.61	163.258	0.583586	8.11439e-07	7.98721e-06
		ENSG00000178700	protein_coding	DHFR2	32.4506	25.781	39.1201	0.583119	0.0137425	0.0437806
		ENSG00000180758	protein_coding	GPR157	159.672	127.665	191.679	0.582583	1.5055e-07	1.73474e-06
		ENSG00000185787	protein_coding	MORF4L1	2319.97	1857.9	2782.05	0.582221	9.08873e-34	1.04832e-31
		ENSG00000214999	lncRNA	AC129492.1	35.047	27.8884	42.2056	0.580728	0.0104831	0.0350227
		ENSG00000030110	protein_coding	BAK1	318.083	254.958	381.208	0.578449	1.75092e-12	4.14705e-11
		ENSG00000175745	protein_coding	NR2F1	1186.67	952.064	1421.28	0.577566	9.43107e-09	1.33799e-07
		ENSG00000130787	protein_coding	HIP1R	1154.45	926.422	1382.48	0.577003	1.35957e-32	1.42206e-30
		ENSG00000141526	protein_coding	SLC16A3	1437.8	1153.87	1721.73	0.576975	6.00887e-33	6.52835e-31
		ENSG00000118515	protein_coding	SGK1	48.6305	38.853	58.408	0.57597	0.00320997	0.0127701
		ENSG00000120889	protein_coding	TNFRSF10B	1808.94	1453.23	2164.65	0.574544	1.13715e-43	1.896e-41
		ENSG00000170855	protein_coding	TRIAP1	623.235	500.751	745.72	0.573595	3.33425e-21	1.72235e-19
		ENSG00000180901	protein_coding	KCTD2	711.164	571.956	850.371	0.571363	1.6413e-20	7.98831e-19
		ENSG00000286388	lncRNA	AC026748.3	82.341	66.0511	98.631	0.571334	0.000126202	0.00075363
		ENSG00000198576	protein_coding	ARC	179.255	144.117	214.392	0.569742	4.89255e-08	6.13024e-07
		ENSG00000174132	protein_coding	FAM174A	130.034	104.503	155.564	0.569465	3.83709e-06	3.2276e-05
		ENSG00000110400	protein_coding	NECTIN1	289.262	232.719	345.805	0.569354	1.12297e-11	2.40152e-10
		ENSG00000132768	protein_coding	DPH2	590.759	475.489	706.03	0.569327	2.99242e-19	1.33667e-17
		ENSG00000131019	protein_coding	ULBP3	686.631	552.696	820.566	0.569282	1.66283e-23	9.75681e-22
		ENSG00000168778	protein_coding	TCTN2	203.756	163.878	243.634	0.569228	4.50715e-09	6.74071e-08
		ENSG00000084070	protein_coding	SMAP2	309.582	249.116	370.048	0.569005	4.08602e-11	8.08562e-10
		ENSG00000239789	protein_coding	MRPS17	40.2531	32.2285	48.2778	0.568515	0.00668634	0.0238859
		ENSG00000196118	protein_coding	CCDC189	56.9646	45.6907	68.2385	0.568439	0.00200673	0.00858775
		ENSG00000071575	protein_coding	TRIB2	197.175	158.67	235.681	0.567854	3.08628e-08	4.001e-07
		ENSG00000277879	lncRNA	AL391988.1	137.395	110.509	164.28	0.567751	4.30808e-06	3.59009e-05
		ENSG00000157502	protein_coding	PWWP3B	373.98	301.189	446.772	0.567313	4.35758e-13	1.12204e-11
		ENSG00000100335	protein_coding	MIEF1	1613.15	1300.07	1926.23	0.566827	6.66126e-38	8.97405e-36
		ENSG00000119636	protein_coding	BBOF1	165.073	132.883	197.263	0.566446	2.25864e-07	2.50233e-06
		ENSG00000196182	protein_coding	STK40	514.738	414.897	614.578	0.565713	8.01631e-18	3.18384e-16
		ENSG00000184319	transcribed_unprocessed_pseudogene	RPL23AP82	322.28	259.699	384.861	0.5657	4.47929e-12	9.97769e-11
		ENSG00000262003	lncRNA	AC087392.1	53.2914	42.8021	63.7807	0.564563	0.0028764	0.0116635
		ENSG00000136867	protein_coding	SLC31A2	125.459	101.032	149.886	0.564435	1.43341e-05	0.000107235
		ENSG00000174456	protein_coding	C12orf76	56.3157	45.2557	67.3757	0.563853	0.00163554	0.00721952
		ENSG00000170779	protein_coding	CDCA4	824.52	665.356	983.683	0.563366	9.2374e-23	5.18526e-21
		ENSG00000126453	protein_coding	BCL2L12	199.145	160.584	237.707	0.562951	9.27015e-08	1.10559e-06
		ENSG00000141385	protein_coding	AFG3L2	1870.18	1509.9	2230.46	0.56258	1.2235e-42	2.00037e-40
		ENSG00000235106	protein_coding	BRD3OS	202.439	163.382	241.496	0.560913	1.10193e-07	1.29856e-06
		ENSG00000173065	protein_coding	FAM222B	400.561	323.855	477.268	0.558024	9.54257e-14	2.60449e-12
		ENSG00000112977	protein_coding	DAP	648.204	524.388	772.02	0.557123	2.06828e-18	8.68575e-17
		ENSG00000163093	protein_coding	BBS5	36.6952	29.5239	43.8665	0.555699	0.0143867	0.0455758
		ENSG00000196159	protein_coding	FAT4	195.181	157.931	232.431	0.554593	3.48785e-06	2.96944e-05
		ENSG00000132819	protein_coding	RBM38	407.308	329.797	484.818	0.554469	4.57311e-14	1.28781e-12
		ENSG00000088256	protein_coding	GNA11	968.673	784.597	1152.75	0.554467	1.29211e-25	8.70368e-24
		ENSG00000142178	protein_coding	SIK1	40.718	32.8052	48.6307	0.553988	0.0117233	0.038401
		ENSG00000099875	protein_coding	MKNK2	778.836	631.151	926.521	0.55311	6.71853e-24	4.09928e-22
		ENSG00000158109	protein_coding	TPRG1L	358.667	290.577	426.757	0.552915	9.06945e-12	1.9707e-10
		ENSG00000166224	protein_coding	SGPL1	1556.29	1262.91	1849.68	0.550157	1.67604e-30	1.55079e-28
		ENSG00000267100	lncRNA	ILF3-DT	124.296	100.707	147.886	0.549789	4.1091e-05	0.000278013
		ENSG00000249936	processed_pseudogene	RAC1P2	96.8036	78.3919	115.215	0.549738	0.000121724	0.000729477
		ENSG00000135519	protein_coding	KCNH3	283.153	229.68	336.626	0.549529	2.61561e-10	4.63164e-09
		ENSG00000051009	protein_coding	FAM160A2	236.785	192.058	281.511	0.549271	1.79183e-09	2.82003e-08
		ENSG00000174996	protein_coding	KLC2	671.583	545.467	797.698	0.547516	1.26933e-20	6.21382e-19
		ENSG00000119335	protein_coding	SET	11155.7	9064.55	13246.8	0.54729	3.94353e-68	1.44367e-65
		ENSG00000185049	protein_coding	NELFA	466.786	379.134	554.437	0.547116	1.16914e-15	3.92197e-14
		ENSG00000128165	protein_coding	ADM2	54.0132	43.7056	64.3208	0.547084	0.00301286	0.0121101
		ENSG00000269940	lncRNA	AL049840.5	55.0928	44.6151	65.5704	0.545368	0.00375668	0.0146271
		ENSG00000107263	protein_coding	RAPGEF1	1332.99	1084.4	1581.58	0.544056	3.63968e-30	3.27765e-28
		ENSG00000251322	protein_coding	SHANK3	464.576	377.947	551.205	0.543208	8.71007e-15	2.6572e-13
		ENSG00000100583	protein_coding	SAMD15	39.8589	32.2581	47.4597	0.543078	0.0135051	0.0431521
		ENSG00000110921	protein_coding	MVK	256.405	208.709	304.101	0.5409	4.98329e-09	7.41331e-08
		ENSG00000167118	protein_coding	URM1	353.357	287.712	419.002	0.540767	4.46941e-12	9.96886e-11
		ENSG00000245556	lncRNA	SCAMP1-AS1	99.5213	80.9317	118.111	0.539813	7.58266e-05	0.000479685
		ENSG00000171861	protein_coding	MRM3	487.638	397.281	577.996	0.539767	1.28361e-15	4.28039e-14
		ENSG00000114446	protein_coding	IFT57	656.385	535.006	777.763	0.538935	1.07891e-17	4.25498e-16
		ENSG00000165943	protein_coding	MOAP1	201.357	164.088	238.626	0.53755	5.2462e-08	6.55872e-07
		ENSG00000101220	protein_coding	C20orf27	413.162	336.981	489.344	0.53685	9.13942e-12	1.98211e-10
		ENSG00000146535	protein_coding	GNA12	550.771	449.317	652.224	0.536635	1.7272e-17	6.67112e-16
		ENSG00000145632	protein_coding	PLK2	2892.92	2360.92	3424.92	0.536534	2.34551e-06	2.07996e-05
		ENSG00000154813	protein_coding	DPH3	298.356	243.385	353.327	0.535922	2.47024e-10	4.3927e-09
		ENSG00000184949	protein_coding	FAM227A	147.493	120.316	174.671	0.53411	6.9348e-06	5.52422e-05
		ENSG00000161513	protein_coding	FDXR	716.003	585.194	846.812	0.532366	3.7384e-19	1.6567e-17
		ENSG00000063978	protein_coding	RNF4	939.437	767.967	1110.91	0.532042	6.45609e-26	4.51122e-24
		ENSG00000249992	protein_coding	TMEM158	61.5018	50.1138	72.8898	0.531664	0.0029677	0.011956
		ENSG00000155034	protein_coding	FBXL18	521.809	426.849	616.769	0.529966	3.38773e-16	1.18115e-14
		ENSG00000167904	protein_coding	TMEM68	341.65	279.42	403.881	0.52991	9.10522e-11	1.72866e-09
		ENSG00000104221	protein_coding	BRF2	280.011	229.012	331.01	0.529515	2.94827e-09	4.51353e-08
		ENSG00000169718	protein_coding	DUS1L	808.33	661.598	955.061	0.528968	2.28754e-22	1.2589e-20
		ENSG00000181035	protein_coding	SLC25A42	93.3501	76.2542	110.446	0.528661	0.000263654	0.00145524
		ENSG00000174574	protein_coding	AKIRIN1	745.78	610.624	880.937	0.52803	4.12028e-21	2.11541e-19
		ENSG00000169064	protein_coding	ZBBX	43.9423	35.818	52.0665	0.52739	0.00992642	0.0334992
		ENSG00000083817	protein_coding	ZNF416	119.34	97.64	141.041	0.52606	5.61718e-05	0.000366215
		ENSG00000166171	protein_coding	DPCD	195.836	160.355	231.316	0.525857	1.08286e-07	1.27967e-06
		ENSG00000183665	protein_coding	TRMT12	403.368	330.542	476.195	0.525385	2.12131e-12	4.97533e-11
		ENSG00000091879	protein_coding	ANGPT2	159.556	130.739	188.373	0.523545	2.27292e-06	2.02733e-05
		ENSG00000114383	protein_coding	TUSC2	331.5	271.849	391.151	0.523305	3.09929e-11	6.26555e-10
		ENSG00000259426	lncRNA	AC027237.3	40.7881	33.2948	48.2813	0.523049	0.0148779	0.0468132
		ENSG00000132970	protein_coding	WASF3	114.903	94.1602	135.647	0.522019	4.31323e-05	0.000289928
		ENSG00000107249	protein_coding	GLIS3	90.9831	74.5888	107.377	0.51982	0.000300937	0.00163741
		ENSG00000105671	protein_coding	DDX49	761.212	625.503	896.921	0.519267	1.82546e-18	7.6852e-17
		ENSG00000141562	protein_coding	NARF	317.198	260.603	373.793	0.518713	3.42417e-10	5.98786e-09
		ENSG00000235316	processed_pseudogene	DUSP8P5	43.9007	35.9318	51.8696	0.517576	0.0131443	0.0421941
		ENSG00000213762	protein_coding	ZNF134	271.73	223.328	320.133	0.517563	1.4013e-09	2.24315e-08
		ENSG00000118960	protein_coding	HS1BP3	137.978	113.316	162.64	0.517498	1.13055e-05	8.62642e-05
		ENSG00000112658	protein_coding	SRF	1199.67	987.477	1411.86	0.515339	3.67478e-21	1.89246e-19
		ENSG00000240356	transcribed_processed_pseudogene	RPL23AP7	132.829	109.272	156.385	0.513232	1.66946e-05	0.000123197
		ENSG00000087074	protein_coding	PPP1R15A	1223.39	1007.99	1438.8	0.512961	1.15041e-17	4.52639e-16
		ENSG00000205765	protein_coding	C5orf51	596.748	491.652	701.844	0.512636	4.39656e-17	1.64895e-15
		ENSG00000196449	protein_coding	YRDC	486.152	400.573	571.732	0.512199	2.37368e-14	6.89186e-13
		ENSG00000146858	protein_coding	ZC3HAV1L	132.492	109.095	155.889	0.510997	8.78896e-05	0.000546551
		ENSG00000177606	protein_coding	JUN	729.143	601.234	857.051	0.510739	2.11901e-15	6.88747e-14
		ENSG00000176396	protein_coding	EID2	170.061	140.159	199.964	0.509611	3.41631e-06	2.91738e-05
		ENSG00000164916	protein_coding	FOXK1	1703.88	1406.33	2001.43	0.508793	1.02335e-32	1.08385e-30
		ENSG00000118503	protein_coding	TNFAIP3	144.193	118.881	169.505	0.508209	1.85795e-05	0.000135504
		ENSG00000181938	protein_coding	GINS3	218.28	180.054	256.506	0.508183	2.00648e-07	2.24066e-06
		ENSG00000183421	protein_coding	RIPK4	164.226	135.513	192.939	0.506565	3.11289e-06	2.68688e-05
		ENSG00000150457	protein_coding	LATS2	1108.44	916.117	1300.76	0.505284	6.49477e-22	3.51678e-20
		ENSG00000125520	protein_coding	SLC2A4RG	474.205	392.191	556.22	0.503017	1.62289e-13	4.35184e-12
		ENSG00000261188	lncRNA	Z95115.1	49.0409	40.4217	57.6601	0.501992	0.0104786	0.0350227
		ENSG00000118707	protein_coding	TGIF2	243.206	201.16	285.253	0.501794	2.45435e-08	3.23153e-07
		ENSG00000115234	protein_coding	SNX17	734.663	608.026	861.3	0.501686	3.06371e-18	1.2553e-16
		ENSG00000176108	protein_coding	CHMP6	204.636	169.24	240.033	0.501659	1.91778e-06	1.74193e-05
		ENSG00000223768	lncRNA	LINC00205	316.713	262.146	371.281	0.500525	3.99261e-10	6.89596e-09
		ENSG00000170619	protein_coding	COMMD5	219.199	181.393	257.005	0.500344	3.23954e-07	3.48587e-06
		ENSG00000275342	protein_coding	PRAG1	398.833	330.22	467.445	0.500092	1.75716e-11	3.68042e-10
		ENSG00000136888	protein_coding	ATP6V1G1	594.256	492.225	696.288	0.499509	6.911e-13	1.74223e-11
		ENSG00000127585	protein_coding	FBXL16	553.032	458.085	647.98	0.499414	1.69272e-14	5.00973e-13
		ENSG00000204954	protein_coding	C12orf73	113.904	94.2493	133.558	0.498453	0.000196959	0.00112357
		ENSG00000108179	protein_coding	PPIF	692.193	573.672	810.714	0.498232	9.72377e-15	2.93983e-13
		ENSG00000004142	protein_coding	POLDIP2	789.77	654.572	924.968	0.498208	2.49937e-19	1.12538e-17
		ENSG00000132004	protein_coding	FBXW9	103.938	85.9969	121.878	0.498196	0.00040863	0.00214974
		ENSG00000178605	protein_coding	GTPBP6	396.792	328.837	464.746	0.49779	4.37283e-12	9.80538e-11
		ENSG00000119280	protein_coding	C1orf198	599.328	496.793	701.864	0.4977	1.47956e-16	5.31253e-15
		ENSG00000119986	protein_coding	AVPI1	109.931	91.0162	128.847	0.496849	0.00022907	0.00128201
		ENSG00000096872	protein_coding	IFT74	544.648	451.699	637.597	0.496353	2.22792e-12	5.21086e-11
		ENSG00000130764	protein_coding	LRRC47	591.029	490.184	691.875	0.496332	1.45804e-14	4.35343e-13
		ENSG00000185340	protein_coding	GAS2L1	191.131	158.493	223.769	0.494954	1.41527e-06	1.32259e-05
		ENSG00000123728	protein_coding	RAP2C	446.798	370.732	522.863	0.494925	1.94846e-12	4.60197e-11
		ENSG00000253716	lncRNA	MINCR	55.1599	45.644	64.6758	0.493672	0.00704535	0.0250158
		ENSG00000259943	lncRNA	AL050341.2	52.0631	43.0785	61.0477	0.493303	0.00893094	0.0305747
		ENSG00000173846	protein_coding	PLK3	716.169	594.742	837.596	0.493287	4.07788e-16	1.41299e-14
		ENSG00000054598	protein_coding	FOXC1	736.403	611.681	861.125	0.49276	2.56897e-17	9.80986e-16
		ENSG00000159596	protein_coding	TMEM69	335.675	278.763	392.587	0.49248	1.92994e-10	3.50973e-09
		ENSG00000189410	protein_coding	SH2D5	217.102	180.266	253.937	0.49203	2.26669e-07	2.50796e-06
		ENSG00000103502	protein_coding	CDIPT	316.39	262.821	369.959	0.491702	9.70581e-10	1.58994e-08
		ENSG00000145016	protein_coding	RUBCN	1052.15	874.461	1229.84	0.49153	8.13033e-24	4.94277e-22
		ENSG00000168209	protein_coding	DDIT4	321.674	267.35	375.999	0.490445	3.965e-10	6.8553e-09
		ENSG00000167123	protein_coding	CERCAM	176.573	146.705	206.441	0.489985	4.30854e-06	3.59009e-05
		ENSG00000267575	lncRNA	AC006504.5	286.693	238.389	334.997	0.489093	1.24843e-08	1.72466e-07
		ENSG00000011332	protein_coding	DPF1	117.709	97.8073	137.612	0.488358	0.000266032	0.00146644
		ENSG00000103194	protein_coding	USP10	2520.35	2098.69	2942	0.487112	2.34657e-41	3.49701e-39
		ENSG00000075336	protein_coding	TIMM21	572.052	476.374	667.73	0.486305	3.35738e-15	1.0708e-13
		ENSG00000177542	protein_coding	SLC25A22	406.755	338.723	474.787	0.485957	1.12375e-11	2.40152e-10
		ENSG00000177494	protein_coding	ZBED2	470.949	392.252	549.647	0.485671	2.80415e-10	4.94471e-09
		ENSG00000185800	protein_coding	DMWD	313.644	261.226	366.062	0.485214	1.45747e-09	2.32422e-08
		ENSG00000204610	protein_coding	TRIM15	79.7435	66.2994	93.1876	0.484943	0.00145713	0.006547
		ENSG00000006432	protein_coding	MAP3K9	553.506	461.235	645.777	0.484642	5.47293e-15	1.71309e-13
		ENSG00000151065	protein_coding	DCP1B	257.494	214.534	300.454	0.484027	6.9513e-08	8.50726e-07
		ENSG00000113070	protein_coding	HBEGF	148.856	123.973	173.739	0.483584	2.19395e-05	0.000157486
		ENSG00000121289	protein_coding	CEP89	585.524	488.199	682.849	0.483256	1.92271e-15	6.26276e-14
		ENSG00000111860	protein_coding	CEP85L	546.532	455.951	637.113	0.481771	9.35564e-14	2.55761e-12
		ENSG00000067048	protein_coding	DDX3Y	233.56	194.757	272.363	0.481756	4.08055e-07	4.30824e-06
		ENSG00000157796	protein_coding	WDR19	279.087	232.773	325.401	0.481535	1.02793e-08	1.44373e-07
		ENSG00000144199	protein_coding	FAHD2B	63.2401	52.6234	73.8568	0.48127	0.00603267	0.0219322
		ENSG00000129932	protein_coding	DOHH	194.673	162.362	226.984	0.480854	1.32832e-06	1.24966e-05
		ENSG00000141985	protein_coding	SH3GL1	1043.02	871.241	1214.8	0.47911	1.77944e-21	9.33516e-20
		ENSG00000113552	protein_coding	GNPDA1	675.467	564.185	786.749	0.479012	2.72891e-15	8.75329e-14
		ENSG00000082068	protein_coding	WDR70	509.118	425.254	592.982	0.478703	3.81558e-13	9.85495e-12
		ENSG00000131381	protein_coding	RBSN	798.265	667.133	929.397	0.477711	2.50561e-18	1.04184e-16
		ENSG00000089818	protein_coding	NECAP1	557.22	465.745	648.696	0.477131	6.65442e-14	1.84613e-12
		ENSG00000223508	transcribed_processed_pseudogene	RPL23AP53	118.197	98.676	137.719	0.476844	0.000162645	0.000946091
		ENSG00000079432	protein_coding	CIC	873.555	730.403	1016.71	0.476582	2.38119e-19	1.07794e-17
		ENSG00000177169	protein_coding	ULK1	200.513	167.569	233.456	0.475977	1.50283e-06	1.39206e-05
		ENSG00000197312	protein_coding	DDI2	1677.43	1403.2	1951.65	0.475689	2.99499e-30	2.72625e-28
		ENSG00000198746	protein_coding	GPATCH3	253.725	212.195	295.256	0.47467	3.18202e-07	3.43274e-06
		ENSG00000204604	protein_coding	ZNF468	341.457	285.641	397.273	0.474515	1.37157e-08	1.88395e-07
		ENSG00000139722	protein_coding	VPS37B	1057.55	885.277	1229.81	0.473783	1.82801e-22	1.0093e-20
		ENSG00000198794	protein_coding	SCAMP5	77.2658	64.5302	90.0014	0.473729	0.00251564	0.0104208
		ENSG00000149115	protein_coding	TNKS1BP1	524.075	438.665	609.485	0.473552	4.88847e-11	9.63956e-10
		ENSG00000132825	protein_coding	PPP1R3D	60.3894	50.4096	70.3691	0.473261	0.00701475	0.0249163
		ENSG00000161677	protein_coding	JOSD2	86.2464	72.0659	100.427	0.47317	0.0011831	0.00546444
		ENSG00000177082	protein_coding	WDR73	657.283	550.43	764.137	0.472542	2.66947e-15	8.57898e-14
		ENSG00000105552	protein_coding	BCAT2	267.938	224.31	311.567	0.472251	5.63508e-08	7.03445e-07
		ENSG00000168256	protein_coding	NKIRAS2	546.223	457.587	634.86	0.471513	7.3402e-13	1.84216e-11
		ENSG00000197852	protein_coding	INKA2	131.272	109.857	152.686	0.47128	0.000118066	0.000709889
		ENSG00000119421	protein_coding	NDUFA8	235.422	197.148	273.696	0.471257	4.5004e-07	4.69268e-06
		ENSG00000167981	protein_coding	ZNF597	292.696	245.286	340.107	0.46989	2.05213e-08	2.74061e-07
		ENSG00000065559	protein_coding	MAP2K4	1136.67	953.082	1320.25	0.469724	9.42884e-21	4.65636e-19
		ENSG00000080546	protein_coding	SESN1	480.538	402.837	558.239	0.46969	2.76592e-11	5.639e-10
		ENSG00000256628	lncRNA	ZBTB11-AS1	54.1721	45.2871	63.0572	0.46875	0.0146965	0.0463462
		ENSG00000182934	protein_coding	SRPRA	1297.54	1088.45	1506.63	0.468685	2.13569e-24	1.33204e-22
		ENSG00000170260	protein_coding	ZNF212	248.513	208.343	288.683	0.468606	2.26564e-07	2.50796e-06
		ENSG00000105810	protein_coding	CDK6	5666.25	4756.05	6576.44	0.46746	9.05222e-40	1.281e-37
		ENSG00000205084	protein_coding	TMEM231	132.486	111.07	153.902	0.466954	0.000175634	0.0010136
		ENSG00000117682	protein_coding	DHDDS	527.976	443.116	612.836	0.466917	1.09104e-12	2.64742e-11
		ENSG00000278970	lncRNA	HEIH	79.0703	66.2332	91.9074	0.46662	0.00303382	0.0121758
		ENSG00000178821	protein_coding	TMEM52	65.6748	55.0025	76.3471	0.465856	0.0051746	0.019207
		ENSG00000170100	protein_coding	ZNF778	1452.98	1220.55	1685.41	0.465241	2.68631e-18	1.11148e-16
		ENSG00000232098	lncRNA	AC012313.1	140.659	118.017	163.301	0.46517	8.13862e-05	0.000509875
		ENSG00000274425	lncRNA	AC114271.1	70.5165	59.0955	81.9374	0.464765	0.0062987	0.0227423
		ENSG00000034152	protein_coding	MAP2K3	1156.44	971.686	1341.2	0.464549	1.16005e-15	3.89924e-14
		ENSG00000240489	processed_pseudogene	SETP14	59.9664	50.238	69.6947	0.464388	0.0108614	0.0360762
		ENSG00000115267	protein_coding	IFIH1	161.931	135.934	187.928	0.464356	5.76096e-05	0.000375298
		ENSG00000196396	protein_coding	PTPN1	1426.66	1199.28	1654.04	0.463496	1.59149e-25	1.05932e-23
		ENSG00000103942	protein_coding	HOMER2	91.198	76.5207	105.875	0.463274	0.00378784	0.0147246
		ENSG00000105447	protein_coding	GRWD1	1885.4	1585.62	2185.19	0.462462	5.41565e-28	4.26166e-26
		ENSG00000138942	protein_coding	RNF185	368.002	309.385	426.619	0.462264	4.73139e-10	8.12198e-09
		ENSG00000020129	protein_coding	NCDN	513.058	431.405	594.712	0.462232	1.70408e-12	4.04749e-11
		ENSG00000284024	protein_coding	HSPA14	590.525	496.703	684.347	0.46155	9.90364e-12	2.13817e-10
		ENSG00000102100	protein_coding	SLC35A2	185.652	156.071	215.234	0.461177	7.63262e-06	6.01185e-05
		ENSG00000088356	protein_coding	PDRG1	243.87	205.097	282.642	0.460744	2.33653e-07	2.58015e-06
		ENSG00000167977	protein_coding	KCTD5	782.513	658.497	906.53	0.460579	2.12268e-15	6.88747e-14
		ENSG00000130669	protein_coding	PAK4	523.941	440.985	606.896	0.459825	7.59434e-12	1.66089e-10
		ENSG00000240891	protein_coding	PLCXD2	940.826	792.114	1089.54	0.459441	2.31641e-16	8.17786e-15
		ENSG00000164066	protein_coding	INTU	783.967	660.025	907.909	0.45943	1.87388e-15	6.11552e-14
		ENSG00000137502	protein_coding	RAB30	114.707	96.4465	132.967	0.459199	0.000517723	0.00264436
		ENSG00000183077	protein_coding	AFMID	272.529	229.37	315.688	0.459107	1.73788e-07	1.97342e-06
		ENSG00000110768	protein_coding	GTF2H1	1556.35	1311.01	1801.69	0.458368	2.3012e-25	1.50787e-23
		ENSG00000110060	protein_coding	PUS3	352.736	297.019	408.453	0.458294	6.9609e-08	8.51282e-07
		ENSG00000116586	protein_coding	LAMTOR2	75.1661	63.1767	87.1555	0.458	0.00418615	0.0160398
		ENSG00000119242	protein_coding	CCDC92	57.4367	48.2442	66.6292	0.457693	0.0125867	0.0406286
		ENSG00000124217	protein_coding	MOCS3	226.362	190.641	262.084	0.457114	1.59927e-06	1.47409e-05
		ENSG00000105227	protein_coding	PRX	68.6679	57.7308	79.605	0.456751	0.00747987	0.0262583
		ENSG00000166145	protein_coding	SPINT1	1008.99	850.44	1167.53	0.456723	1.73983e-14	5.14013e-13
		ENSG00000027001	protein_coding	MIPEP	320.481	270.056	370.906	0.45635	5.74151e-08	7.14613e-07
		ENSG00000120833	protein_coding	SOCS2	230.245	194.038	266.452	0.455521	8.41363e-07	8.26155e-06
		ENSG00000146083	protein_coding	RNF44	419.892	354.195	485.589	0.454091	2.34933e-10	4.19542e-09
		ENSG00000148926	protein_coding	ADM	490.623	414.057	567.188	0.45306	2.66624e-10	4.71634e-09
		ENSG00000112787	protein_coding	FBRSL1	1123.41	948.513	1298.3	0.452474	1.85817e-19	8.50317e-18
		ENSG00000218891	protein_coding	ZNF579	253.29	213.754	292.825	0.452273	3.51722e-07	3.76063e-06
		ENSG00000168661	protein_coding	ZNF30	98.6194	83.133	114.106	0.452219	0.00108894	0.00509523
		ENSG00000105656	protein_coding	ELL	391.162	330.199	452.126	0.452212	2.87007e-09	4.40182e-08
		ENSG00000198205	protein_coding	ZXDA	71.9692	60.6296	83.3087	0.452058	0.00411101	0.0157986
		ENSG00000134590	protein_coding	RTL8C	203.055	171.349	234.76	0.451983	3.68624e-06	3.11472e-05
		ENSG00000182858	protein_coding	ALG12	170.405	143.794	197.015	0.451606	7.42728e-05	0.000470916
		ENSG00000183891	protein_coding	TTC32	67.6124	56.9876	78.2371	0.450431	0.00663858	0.0237505
		ENSG00000101871	protein_coding	MID1	2309.38	1951.92	2666.84	0.450041	4.03716e-24	2.49032e-22
		ENSG00000113048	protein_coding	MRPS27	1613.52	1364.09	1862.94	0.44936	8.77906e-24	5.27997e-22
		ENSG00000106683	protein_coding	LIMK1	450.884	381.343	520.424	0.447591	7.73443e-11	1.48685e-09
		ENSG00000159423	protein_coding	ALDH4A1	96.0047	81.0918	110.918	0.447125	0.00160804	0.00711678
		ENSG00000122008	protein_coding	POLK	729.114	616.978	841.251	0.446696	1.38287e-15	4.59319e-14
		ENSG00000164054	protein_coding	SHISA5	316.202	267.504	364.9	0.446506	2.81906e-08	3.68292e-07
		ENSG00000197358	transcribed_processed_pseudogene	BNIP3P1	56.7941	47.9222	65.6659	0.446461	0.0130295	0.0418654
		ENSG00000148229	protein_coding	POLE3	2596.72	2198.3	2995.14	0.44606	7.70159e-30	6.71994e-28
		ENSG00000188070	protein_coding	C11orf95	431.318	365.021	497.616	0.446	3.1937e-10	5.59063e-09
		ENSG00000116922	protein_coding	C1orf109	529.153	448.037	610.27	0.444974	3.11938e-12	7.13727e-11
		ENSG00000026103	protein_coding	FAS	484.26	410.207	558.313	0.443791	1.95789e-11	4.08056e-10
		ENSG00000160446	protein_coding	ZDHHC12	134.697	114.002	155.391	0.443492	0.00032361	0.00174666
		ENSG00000168734	protein_coding	PKIG	221.76	187.794	255.725	0.443407	3.66703e-06	3.10004e-05
		ENSG00000167637	protein_coding	ZNF283	347.345	294.294	400.395	0.442868	1.11019e-08	1.54765e-07
		ENSG00000128891	protein_coding	CCDC32	353.494	299.553	407.435	0.442489	8.2755e-09	1.18604e-07
		ENSG00000123091	protein_coding	RNF11	1126.6	955.374	1297.82	0.441556	3.10652e-20	1.48619e-18
		ENSG00000198324	protein_coding	PHETA1	131.693	111.555	151.831	0.441311	0.000301951	0.00164187
		ENSG00000121671	protein_coding	CRY2	255.793	216.821	294.765	0.441307	1.61953e-06	1.49114e-05
		ENSG00000168101	protein_coding	NUDT16L1	87.0097	73.6758	100.344	0.440542	0.00236333	0.00989996
		ENSG00000059769	protein_coding	DNAJC25	362.887	307.817	417.958	0.440056	4.96054e-09	7.38599e-08
		ENSG00000140830	protein_coding	TXNL4B	413.984	351.301	476.666	0.439193	5.3264e-10	9.06816e-09
		ENSG00000174446	protein_coding	SNAPC5	369.489	313.639	425.339	0.438304	9.96172e-09	1.40264e-07
		ENSG00000182224	protein_coding	CYB5D1	128.513	109.021	148.004	0.437565	0.000292599	0.00159462
		ENSG00000109220	protein_coding	CHIC2	308.426	261.874	354.978	0.437418	6.80369e-07	6.80774e-06
		ENSG00000128512	protein_coding	DOCK4	173.818	147.528	200.109	0.437236	0.0001222	0.000732067
		ENSG00000129473	protein_coding	BCL2L2	552.295	469.154	635.436	0.436881	4.0614e-12	9.13137e-11
		ENSG00000124882	protein_coding	EREG	13178.6	11200.5	15156.7	0.436358	4.18478e-11	8.27132e-10
		ENSG00000058729	protein_coding	RIOK2	554.771	471.408	638.134	0.436086	1.39786e-10	2.58681e-09
		ENSG00000182095	protein_coding	TNRC18	1701.5	1446.21	1956.8	0.43596	4.62249e-21	2.35175e-19
		ENSG00000105072	protein_coding	C19orf44	187.59	159.381	215.799	0.434855	6.15431e-05	0.000398917
		ENSG00000153531	protein_coding	ADPRHL1	149.118	126.676	171.56	0.434619	0.000123168	0.00073743
		ENSG00000149792	protein_coding	MRPL49	973.366	827.727	1119	0.434536	1.94261e-17	7.46884e-16
		ENSG00000187189	protein_coding	TSPYL4	159.931	135.888	183.975	0.434329	9.32561e-05	0.00057504
		ENSG00000188215	protein_coding	DCUN1D3	631.309	536.857	725.762	0.43426	2.52356e-13	6.66094e-12
		ENSG00000101400	protein_coding	SNTA1	107.941	91.6801	124.203	0.433933	0.00144375	0.0064955
		ENSG00000140105	protein_coding	WARS1	1457.87	1240.12	1675.63	0.433918	9.84487e-22	5.22989e-20
		ENSG00000196152	protein_coding	ZNF79	190.283	161.759	218.807	0.433501	2.06674e-05	0.000149053
		ENSG00000196511	protein_coding	TPK1	78.6325	66.7731	90.492	0.432932	0.00565446	0.0207725
		ENSG00000260290	processed_pseudogene	AC092115.1	93.3704	79.3188	107.422	0.432849	0.00270547	0.0110663
		ENSG00000174628	protein_coding	IQCK	189.397	161.309	217.485	0.428787	0.000126987	0.000757513
		ENSG00000131408	protein_coding	NR1H2	318.718	271.594	365.843	0.42841	1.19597e-07	1.40252e-06
		ENSG00000102678	protein_coding	FGF9	68.9215	58.651	79.1921	0.426914	0.00998005	0.0336465
		ENSG00000262814	protein_coding	MRPL12	79.7341	67.9047	91.5634	0.42584	0.00501304	0.018681
		ENSG00000164818	protein_coding	DNAAF5	687.176	586.356	787.996	0.425783	8.68713e-13	2.15451e-11
		ENSG00000042317	protein_coding	SPATA7	86.1071	73.3737	98.8405	0.424833	0.00421781	0.0161317
		ENSG00000066654	protein_coding	THUMPD1	2573.42	2197.4	2949.43	0.424469	9.93633e-29	8.08347e-27
		ENSG00000136463	protein_coding	TACO1	557.264	475.886	638.642	0.42362	2.21161e-11	4.56975e-10
		ENSG00000170836	protein_coding	PPM1D	1131.48	966.534	1296.43	0.423271	5.62691e-19	2.47408e-17
		ENSG00000114739	protein_coding	ACVR2B	903.346	771.764	1034.93	0.422826	4.03301e-15	1.27902e-13
		ENSG00000273841	protein_coding	TAF9	481.928	411.746	552.11	0.42231	1.33287e-08	1.83679e-07
		ENSG00000173020	protein_coding	GRK2	1026.49	877.191	1175.78	0.42224	6.14936e-16	2.11337e-14
		ENSG00000183647	protein_coding	ZNF530	86.8701	74.105	99.6351	0.422153	0.00444162	0.0168575
		ENSG00000116133	protein_coding	DHCR24	3000.85	2564.88	3436.82	0.422041	2.6445e-30	2.42029e-28
		ENSG00000178229	protein_coding	ZNF543	278.184	237.651	318.716	0.42189	6.90241e-07	6.89013e-06
		ENSG00000183340	protein_coding	JRKL	236.439	201.984	270.894	0.421674	4.40816e-06	3.66584e-05
		ENSG00000163001	protein_coding	CFAP36	519.079	443.696	594.462	0.42119	1.44942e-09	2.31577e-08
		ENSG00000177045	protein_coding	SIX5	84.1909	71.8588	96.523	0.42064	0.00460602	0.0173835
		ENSG00000165244	protein_coding	ZNF367	1010.31	863.987	1156.64	0.42043	3.70798e-17	1.39692e-15
		ENSG00000243335	protein_coding	KCTD7	108.106	92.3297	123.882	0.420162	0.0015537	0.00690898
		ENSG00000152763	protein_coding	WDR78	91.8149	78.4361	105.194	0.418833	0.00413798	0.0158914
		ENSG00000182307	protein_coding	C8orf33	1004.21	859.436	1148.98	0.418472	1.53571e-16	5.50243e-15
		ENSG00000164758	protein_coding	MED30	182.593	156.157	209.03	0.418395	0.000110133	0.000666656
		ENSG00000166848	protein_coding	TERF2IP	996.819	853.269	1140.37	0.418003	8.56508e-17	3.11525e-15
		ENSG00000172586	protein_coding	CHCHD1	95.3054	81.4572	109.154	0.417801	0.00316164	0.0126016
		ENSG00000124766	protein_coding	SOX4	2618.94	2242.38	2995.51	0.41761	3.90644e-07	4.13478e-06
		ENSG00000059728	protein_coding	MXD1	108.281	92.5761	123.985	0.417542	0.00173633	0.00760267
		ENSG00000164885	protein_coding	CDK5	98.6134	84.3009	112.926	0.417463	0.00283495	0.0115204
		ENSG00000083535	protein_coding	PIBF1	685.225	586.782	783.668	0.416803	1.19601e-11	2.54303e-10
		ENSG00000143158	protein_coding	MPC2	222.447	190.521	254.373	0.415108	1.68278e-05	0.000124017
		ENSG00000225190	protein_coding	PLEKHM1	315.196	270.03	360.363	0.414997	1.59699e-07	1.82824e-06
		ENSG00000170684	protein_coding	ZNF296	127.279	108.973	145.585	0.414584	0.00107996	0.00506166
		ENSG00000149016	protein_coding	TUT1	139.342	119.322	159.363	0.414445	0.000591721	0.00297539
		ENSG00000128581	protein_coding	IFT22	375.001	321.391	428.612	0.414223	1.79298e-07	2.03051e-06
		ENSG00000126062	protein_coding	TMEM115	301.923	258.749	345.097	0.41406	6.67468e-07	6.69057e-06
		ENSG00000124444	protein_coding	ZNF576	126.816	108.602	145.029	0.413977	0.00108569	0.00508286
		ENSG00000159348	protein_coding	CYB5R1	174.894	149.909	199.878	0.412644	0.000127094	0.000757886
		ENSG00000119599	protein_coding	DCAF4	217.757	186.688	248.827	0.412596	2.92347e-05	0.000204959
		ENSG00000162191	protein_coding	UBXN1	717.652	615.626	819.679	0.412421	1.24026e-11	2.63047e-10
		ENSG00000258429	protein_coding	PDF	81.4475	69.7538	93.1411	0.412016	0.00886879	0.0303805
		ENSG00000138107	protein_coding	ACTR1A	1666.67	1430.64	1902.7	0.411141	2.73459e-23	1.58795e-21
		ENSG00000089116	protein_coding	LHX5	120.519	103.33	137.708	0.410895	0.00125792	0.0057595
		ENSG00000186272	protein_coding	ZNF17	118.164	101.319	135.01	0.410637	0.00163918	0.0072318
		ENSG00000181817	protein_coding	LSM10	205.677	176.534	234.82	0.409588	6.33472e-05	0.00040888
		ENSG00000072958	protein_coding	AP1M1	516.292	443.353	589.231	0.409573	5.0257e-10	8.60089e-09
		ENSG00000135974	protein_coding	C2orf49	424.821	364.787	484.855	0.409521	4.11557e-08	5.211e-07
		ENSG00000180015	processed_pseudogene	AC093909.1	83.7765	71.8368	95.7163	0.409092	0.00603691	0.0219392
		ENSG00000215251	protein_coding	FASTKD5	677.785	582.209	773.36	0.408993	1.19951e-12	2.8981e-11
		ENSG00000095397	protein_coding	WHRN	113.438	97.3292	129.546	0.40887	0.00130138	0.00593107
		ENSG00000240682	protein_coding	ISY1	271.425	233.089	309.761	0.408752	3.26343e-06	2.80103e-05
		ENSG00000055070	protein_coding	SZRD1	1429.26	1228.13	1630.4	0.40847	5.77281e-21	2.90597e-19
		ENSG00000089123	protein_coding	TASP1	293.962	252.517	335.407	0.408123	1.26359e-06	1.19678e-05
		ENSG00000078804	protein_coding	TP53INP2	138.772	119.134	158.409	0.408091	0.000751424	0.00367208
		ENSG00000152582	protein_coding	SPEF2	84.4521	72.4481	96.4562	0.408027	0.0118719	0.0387598
		ENSG00000147400	protein_coding	CETN2	350.662	301.285	400.039	0.407834	4.14502e-07	4.37083e-06
		ENSG00000128335	protein_coding	APOL2	305.067	262.114	348.019	0.407615	5.02959e-06	4.13162e-05
		ENSG00000136003	protein_coding	ISCU	991.189	851.993	1130.39	0.407485	1.15303e-14	3.45498e-13
		ENSG00000100292	protein_coding	HMOX1	1480.47	1272.78	1688.15	0.407186	1.93587e-16	6.89219e-15
		ENSG00000198909	protein_coding	MAP3K3	491.992	422.961	561.022	0.406696	8.3151e-10	1.38093e-08
		ENSG00000117748	protein_coding	RPA2	1136.78	977.507	1296.06	0.406595	2.99165e-17	1.13467e-15
		ENSG00000152102	protein_coding	FAM168B	1977.9	1701.29	2254.5	0.405966	7.46907e-21	3.7103e-19
		ENSG00000138623	protein_coding	SEMA7A	444.568	382.313	506.822	0.405801	6.0917e-07	6.16491e-06
		ENSG00000154174	protein_coding	TOMM70	1704.52	1466.29	1942.75	0.405687	3.21749e-23	1.84923e-21
		ENSG00000129911	protein_coding	KLF16	328.359	282.355	374.364	0.405677	4.0343e-06	3.38335e-05
		ENSG00000203727	protein_coding	SAMD5	259.409	223.12	295.698	0.404722	7.56698e-06	5.96852e-05
		ENSG00000090971	protein_coding	NAT14	117.817	101.27	134.363	0.404456	0.00123009	0.00565665
		ENSG00000116761	protein_coding	CTH	130.874	112.52	149.227	0.404199	0.00112242	0.00523007
		ENSG00000115271	protein_coding	GCA	135.557	116.598	154.517	0.403205	0.000844313	0.0040775
		ENSG00000113595	protein_coding	TRIM23	393.264	338.545	447.983	0.403055	7.96295e-08	9.62642e-07
		ENSG00000081181	protein_coding	ARG2	103.344	88.8632	117.825	0.403034	0.00283099	0.0115099
		ENSG00000165688	protein_coding	PMPCA	1425.63	1227.72	1623.54	0.402871	2.31387e-18	9.66886e-17
		ENSG00000148300	protein_coding	REXO4	775.036	667.683	882.39	0.401728	2.24772e-12	5.23535e-11
		ENSG00000198113	protein_coding	TOR4A	422.847	364.254	481.44	0.40145	2.0522e-08	2.74061e-07
		ENSG00000149346	protein_coding	SLX4IP	484.111	417.103	551.118	0.401118	2.46359e-09	3.80963e-08
		ENSG00000174276	protein_coding	ZNHIT2	83.8867	72.1631	95.6103	0.401061	0.0101001	0.0340172
		ENSG00000088876	protein_coding	ZNF343	250.09	215.435	284.744	0.400795	1.01863e-05	7.82559e-05
		ENSG00000168394	protein_coding	TAP1	427.878	368.711	487.045	0.400616	7.68389e-07	7.5937e-06
		ENSG00000186907	protein_coding	RTN4RL2	125.406	107.968	142.844	0.400598	0.00120686	0.00556506
		ENSG00000179151	protein_coding	EDC3	513.977	442.977	584.976	0.400356	1.89411e-09	2.97268e-08
		ENSG00000101365	protein_coding	IDH3B	909.799	784.431	1035.17	0.3997	6.27468e-14	1.74654e-12
		ENSG00000122644	protein_coding	ARL4A	514.656	443.689	585.623	0.399638	1.19045e-09	1.92391e-08
		ENSG00000169981	protein_coding	ZNF35	400.526	345.315	455.736	0.399277	3.0995e-08	4.00888e-07
		ENSG00000002919	protein_coding	SNX11	201.323	173.524	229.122	0.398974	6.89887e-05	0.000440565
		ENSG00000126254	protein_coding	RBM42	738.679	637.111	840.246	0.398722	3.93665e-10	6.82028e-09
		ENSG00000165406	protein_coding	MARCHF8	456.814	393.986	519.641	0.398489	1.09788e-08	1.53176e-07
		ENSG00000153574	protein_coding	RPIA	573.705	494.93	652.481	0.398009	1.12999e-10	2.11904e-09
		ENSG00000160213	protein_coding	CSTB	301.099	259.709	342.489	0.397824	1.39037e-06	1.30222e-05
		ENSG00000143878	protein_coding	RHOB	796.084	686.887	905.282	0.397788	2.73763e-12	6.29803e-11
		ENSG00000139719	protein_coding	VPS33A	170.024	146.598	193.451	0.397737	0.000261755	0.00144665
		ENSG00000131845	protein_coding	ZNF304	299.787	258.615	340.96	0.397452	1.04569e-06	1.00568e-05
		ENSG00000196072	protein_coding	BLOC1S2	866.07	747.397	984.744	0.39741	4.83414e-14	1.35905e-12
		ENSG00000002745	protein_coding	WNT16	2021.98	1745.33	2298.62	0.397068	5.78087e-21	2.90597e-19
		ENSG00000134901	protein_coding	POGLUT2	169.71	146.371	193.05	0.396977	0.000410591	0.00215661
		ENSG00000160813	protein_coding	PPP1R35	106.656	91.9426	121.37	0.396839	0.00231844	0.00973386
		ENSG00000137221	protein_coding	TJAP1	597.9	516.239	679.56	0.395892	1.21272e-10	2.2616e-09
		ENSG00000170310	protein_coding	STX8	152.842	131.93	173.753	0.394653	0.000397258	0.00209705
		ENSG00000163898	protein_coding	LIPH	306.929	265.167	348.691	0.393748	1.21574e-06	1.15211e-05
		ENSG00000079215	protein_coding	SLC1A3	560.012	483.996	636.028	0.393384	1.21823e-09	1.96692e-08
		ENSG00000196814	protein_coding	MVB12B	198.875	171.825	225.925	0.392902	0.000216736	0.00122437
		ENSG00000167566	protein_coding	NCKAP5L	188.625	162.966	214.284	0.392843	0.000492627	0.00252768
		ENSG00000271601	protein_coding	LIX1L	188.415	162.803	214.027	0.392559	0.000109355	0.000662426
		ENSG00000163644	protein_coding	PPM1K	172.134	148.759	195.509	0.391951	0.000233424	0.00130334
		ENSG00000167964	protein_coding	RAB26	80.2398	69.2857	91.1939	0.391439	0.0103661	0.0347669
		ENSG00000005194	protein_coding	CIAPIN1	718.311	621.328	815.294	0.391413	9.9434e-12	2.14401e-10
		ENSG00000176101	protein_coding	SSNA1	351.102	303.642	398.561	0.391301	1.3178e-06	1.24115e-05
		ENSG00000104973	protein_coding	MED25	640.155	553.795	726.514	0.391018	2.89866e-11	5.89534e-10
		ENSG00000083635	protein_coding	NUFIP1	856.755	741.332	972.177	0.390638	1.28807e-13	3.48172e-12
		ENSG00000255737	lncRNA	AGAP2-AS1	103.278	89.2517	117.305	0.390485	0.00389526	0.0150831
		ENSG00000057757	protein_coding	PITHD1	917.872	794.353	1041.39	0.390229	3.56865e-14	1.01342e-12
		ENSG00000147642	protein_coding	SYBU	364.979	315.858	414.1	0.389624	2.97844e-07	3.23385e-06
		ENSG00000264247	lncRNA	LINC00909	129.341	111.847	146.835	0.389624	0.00150438	0.00671628
		ENSG00000105402	protein_coding	NAPA	224.509	194.245	254.773	0.389575	5.23123e-05	0.000344117
		ENSG00000066117	protein_coding	SMARCD1	1095.42	948.318	1242.51	0.38946	6.1108e-17	2.26665e-15
		ENSG00000183778	protein_coding	B3GALT5	126.922	109.776	144.068	0.38908	0.00124957	0.0057261
		ENSG00000198925	protein_coding	ATG9A	343.458	297.314	389.602	0.388868	1.42077e-06	1.32553e-05
		ENSG00000168884	protein_coding	TNIP2	995.745	862.222	1129.27	0.388863	1.6406e-14	4.88121e-13
		ENSG00000139112	protein_coding	GABARAPL1	472.929	409.475	536.382	0.388654	2.50956e-08	3.29906e-07
		ENSG00000186501	protein_coding	TMEM222	169.984	147.099	192.868	0.388513	0.000425508	0.002224
		ENSG00000103351	protein_coding	CLUAP1	303.501	262.761	344.24	0.388369	2.95839e-06	2.56404e-05
		ENSG00000128510	protein_coding	CPA4	777.516	673.421	881.612	0.38813	1.13918e-08	1.58282e-07
		ENSG00000171202	protein_coding	TMEM126A	135.409	117.186	153.633	0.38779	0.000929706	0.0044352
		ENSG00000148200	protein_coding	NR6A1	480.986	416.614	545.358	0.387677	1.09272e-08	1.52583e-07
		ENSG00000059573	protein_coding	ALDH18A1	1634.12	1415.88	1852.36	0.387422	1.98869e-17	7.62861e-16
		ENSG00000105085	protein_coding	MED26	190.468	164.921	216.015	0.387297	0.00018552	0.0010659
		ENSG00000164144	protein_coding	ARFIP1	479.794	415.741	543.846	0.386697	4.01206e-08	5.08758e-07
		ENSG00000130244	protein_coding	FAM98C	263.751	228.48	299.021	0.386693	1.01025e-05	7.7683e-05
		ENSG00000112033	protein_coding	PPARD	574.034	497.434	650.635	0.386661	3.18567e-09	4.85491e-08
		ENSG00000177150	protein_coding	FAM210A	1046.05	906.735	1185.36	0.386198	1.58378e-15	5.21935e-14
		ENSG00000253251	protein_coding	SHLD3	85.6832	74.1663	97.2	0.385637	0.0160456	0.0497437
		ENSG00000182919	protein_coding	C11orf54	371.12	321.694	420.545	0.385523	6.98368e-07	6.96713e-06
		ENSG00000100242	protein_coding	SUN2	442.872	383.927	501.816	0.385445	4.57051e-08	5.76535e-07
		ENSG00000164610	protein_coding	RP9	245.114	212.451	277.777	0.385207	8.79516e-05	0.000546735
		ENSG00000123159	protein_coding	GIPC1	939.082	814.442	1063.72	0.384821	1.79707e-10	3.27873e-09
		ENSG00000123933	protein_coding	MXD4	268.777	233.026	304.528	0.384635	0.000215369	0.00121746
		ENSG00000132005	protein_coding	RFX1	170.034	147.368	192.699	0.384634	0.000476857	0.0024595
		ENSG00000115128	protein_coding	SF3B6	695.908	603.694	788.122	0.384045	5.00065e-09	7.43257e-08
		ENSG00000143156	protein_coding	NME7	299.637	259.858	339.416	0.384033	6.05769e-06	4.89499e-05
		ENSG00000116871	protein_coding	MAP7D1	1392.07	1207.8	1576.34	0.383925	1.40699e-17	5.48464e-16
		ENSG00000138111	protein_coding	MFSD13A	230.888	200.235	261.542	0.383664	4.75615e-05	0.0003162
		ENSG00000116670	protein_coding	MAD2L2	433.565	376.124	491.005	0.383634	5.70514e-08	7.11136e-07
		ENSG00000105364	protein_coding	MRPL4	675.805	586.363	765.246	0.383554	1.54604e-11	3.25848e-10
		ENSG00000105698	protein_coding	USF2	877.633	761.557	993.709	0.38343	1.88402e-11	3.93147e-10
		ENSG00000198863	protein_coding	RUNDC1	450.881	391.221	510.542	0.383184	1.25913e-07	1.47044e-06
		ENSG00000197780	protein_coding	TAF13	494.48	429.066	559.895	0.383173	7.35446e-07	7.30673e-06
		ENSG00000166166	protein_coding	TRMT61A	356.821	309.581	404.061	0.383169	5.89147e-07	5.99833e-06
		ENSG00000102078	protein_coding	SLC25A14	120.768	104.716	136.82	0.382592	0.00234676	0.00983314
		ENSG00000123562	protein_coding	MORF4L2	1745.28	1515.09	1975.46	0.382563	7.66752e-21	3.79768e-19
		ENSG00000128272	protein_coding	ATF4	2763.99	2399.84	3128.14	0.382225	3.11182e-19	1.38267e-17
		ENSG00000124333	protein_coding	VAMP7	856.517	743.656	969.378	0.381972	4.95239e-13	1.26361e-11
		ENSG00000082146	protein_coding	STRADB	139.916	121.394	158.438	0.381462	0.00128288	0.00586104
		ENSG00000102931	protein_coding	ARL2BP	530.253	460.425	600.081	0.381462	5.26586e-09	7.80608e-08
		ENSG00000159885	protein_coding	ZNF222	114.851	99.6244	130.077	0.381434	0.00301955	0.0121301
		ENSG00000206625	snRNA	RNU6-1	329.566	286.126	373.006	0.381377	1.5945e-05	0.000117976
		ENSG00000181638	protein_coding	ZFP41	127.932	111.003	144.861	0.381062	0.00158885	0.00704666
		ENSG00000166925	protein_coding	TSC22D4	165.234	143.407	187.06	0.38105	0.000424097	0.00221795
		ENSG00000182544	protein_coding	MFSD5	115.677	100.361	130.994	0.380963	0.00302961	0.0121618
		ENSG00000139637	protein_coding	MYG1	313.748	272.524	354.972	0.380098	4.59581e-06	3.80873e-05
		ENSG00000169047	protein_coding	IRS1	3117.85	2709.41	3526.29	0.380049	2.85791e-18	1.17959e-16
		ENSG00000147144	protein_coding	CCDC120	117.814	102.27	133.358	0.379666	0.0026816	0.0109901
		ENSG00000168993	protein_coding	CPLX1	109.853	95.3528	124.354	0.379608	0.00396659	0.0153135
		ENSG00000135632	protein_coding	SMYD5	528.322	459.117	597.527	0.379416	6.17454e-09	9.06247e-08
		ENSG00000184897	protein_coding	H1-10	345.023	299.82	390.226	0.379103	1.21624e-05	9.18864e-05
		ENSG00000159720	protein_coding	ATP6V0D1	265.218	230.463	299.974	0.378855	2.41235e-05	0.000171554
		ENSG00000148426	protein_coding	PROSER2	228.577	198.611	258.542	0.378779	4.20781e-05	0.000283892
		ENSG00000131467	protein_coding	PSME3	3023.43	2628.7	3418.17	0.37875	1.28283e-23	7.63355e-22
		ENSG00000136870	protein_coding	ZNF189	565.098	491.334	638.862	0.378124	6.9885e-09	1.01717e-07
		ENSG00000198920	protein_coding	KIAA0753	520.91	452.909	588.911	0.378094	3.941e-09	5.93087e-08
		ENSG00000234608	lncRNA	MAPKAPK5-AS1	241.589	209.989	273.188	0.378	2.85508e-05	0.000200833
		ENSG00000163517	protein_coding	HDAC11	91.7565	79.6762	103.837	0.377931	0.0108157	0.0359385
		ENSG00000135900	protein_coding	MRPL44	715.149	621.905	808.393	0.377829	5.72847e-11	1.11782e-09
		ENSG00000235954	lncRNA	TTC28-AS1	172.379	149.831	194.926	0.377369	0.000566624	0.00286287
		ENSG00000179454	protein_coding	KLHL28	567.992	493.997	641.986	0.377366	3.3046e-09	5.02251e-08
		ENSG00000173163	protein_coding	COMMD1	211.065	183.491	238.638	0.377303	9.44067e-05	0.000581283
		ENSG00000142556	protein_coding	ZNF614	284.239	247.162	321.315	0.377188	9.33052e-06	7.22086e-05
		ENSG00000109881	protein_coding	CCDC34	543.265	472.54	613.99	0.377076	7.73203e-09	1.11193e-07
		ENSG00000129295	protein_coding	LRRC6	194.461	169.079	219.843	0.376816	0.000373599	0.00198843
		ENSG00000156384	protein_coding	SFR1	407.064	354.086	460.042	0.37673	6.14815e-07	6.21831e-06
		ENSG00000118894	protein_coding	EEF2KMT	293.145	255.145	331.145	0.37485	5.78114e-06	4.69404e-05
		ENSG00000113739	protein_coding	STC2	968.976	843.697	1094.26	0.374763	1.5267e-12	3.65194e-11
		ENSG00000100307	protein_coding	CBX7	115.44	100.404	130.475	0.374666	0.00432672	0.0164883
		ENSG00000180185	protein_coding	FAHD1	509.798	443.879	575.717	0.374451	5.54601e-09	8.19253e-08
		ENSG00000141699	protein_coding	RETREG3	593.62	516.907	670.333	0.374335	2.75762e-09	4.23708e-08
		ENSG00000147669	protein_coding	POLR2K	518.389	451.383	585.396	0.374332	3.13228e-08	4.04506e-07
		ENSG00000165572	protein_coding	KBTBD6	515.172	448.595	581.749	0.374247	2.183e-08	2.89441e-07
		ENSG00000130479	protein_coding	MAP1S	350.917	305.581	396.252	0.373785	1.20835e-06	1.14705e-05
		ENSG00000167646	protein_coding	DNAAF3	275.499	239.892	311.106	0.37365	1.99315e-05	0.000144178
		ENSG00000254999	protein_coding	BRK1	477.628	416.035	539.221	0.373382	1.74411e-07	1.97917e-06
		ENSG00000168795	protein_coding	ZBTB5	701.897	611.458	792.335	0.373319	1.87379e-11	3.91496e-10
		ENSG00000140471	protein_coding	LINS1	386.233	336.414	436.053	0.373285	4.52685e-07	4.71733e-06
		ENSG00000253719	protein_coding	ATXN7L3B	1190.54	1037.27	1343.81	0.373226	5.58377e-15	1.74454e-13
		ENSG00000164542	protein_coding	KIAA0895	330.481	287.865	373.097	0.373015	5.10316e-06	4.18374e-05
		ENSG00000150347	protein_coding	ARID5B	444.137	386.959	501.316	0.372693	9.73104e-08	1.15646e-06
		ENSG00000175772	lncRNA	LINC01106	77.1678	67.1292	87.2064	0.372609	0.0155615	0.0485199
		ENSG00000138073	protein_coding	PREB	952.847	830.374	1075.32	0.372536	1.4218e-12	3.41557e-11
		ENSG00000172748	protein_coding	ZNF596	295.003	257.013	332.992	0.372367	9.32319e-05	0.00057504
		ENSG00000076108	protein_coding	BAZ2A	3053.28	2661.72	3444.83	0.371954	2.02522e-26	1.45746e-24
		ENSG00000174173	protein_coding	TRMT10C	1489.2	1298.19	1680.22	0.371904	8.57199e-15	2.61982e-13
		ENSG00000100014	protein_coding	SPECC1L	352.576	307.28	397.872	0.371684	9.15724e-07	8.92924e-06
		ENSG00000064995	protein_coding	TAF11	485.988	423.634	548.343	0.371486	3.15174e-08	4.06707e-07
		ENSG00000156502	protein_coding	SUPV3L1	1179.59	1028.55	1330.63	0.371175	2.63628e-15	8.50478e-14
		ENSG00000158122	protein_coding	PRXL2C	367.125	320.063	414.187	0.370906	6.2967e-07	6.34569e-06
		ENSG00000105341	protein_coding	DMAC2	664.414	579.387	749.44	0.370721	1.75346e-10	3.20264e-09
		ENSG00000177732	protein_coding	SOX12	465.876	406.246	525.505	0.370545	9.75089e-08	1.158e-06
		ENSG00000213903	protein_coding	LTB4R	232.095	202.339	261.851	0.370356	9.64542e-05	0.000593022
		ENSG00000126775	protein_coding	ATG14	586.636	511.623	661.648	0.370345	9.532e-10	1.56757e-08
		ENSG00000164117	protein_coding	FBXO8	111.196	96.8756	125.516	0.370304	0.00460219	0.0173769
		ENSG00000090432	protein_coding	MUL1	401.827	350.413	453.242	0.370292	3.20578e-07	3.45396e-06
		ENSG00000120306	protein_coding	CYSTM1	255.742	222.978	288.506	0.370234	4.30419e-05	0.000289699
		ENSG00000164978	protein_coding	NUDT2	263.962	230.169	297.756	0.370019	4.17909e-05	0.000282181
		ENSG00000205922	protein_coding	ONECUT3	887.663	774.449	1000.88	0.3696	9.32903e-09	1.32799e-07
		ENSG00000110108	protein_coding	TMEM109	426.525	372.073	480.976	0.369502	3.39065e-07	3.63544e-06
		ENSG00000149084	protein_coding	HSD17B12	925.315	807.384	1043.25	0.369351	3.46432e-13	8.96147e-12
		ENSG00000131475	protein_coding	VPS25	396.764	346.128	447.4	0.369318	2.32252e-07	2.56636e-06
		ENSG00000100364	protein_coding	KIAA0930	732.398	639.052	825.745	0.369252	4.83693e-09	7.20831e-08
		ENSG00000185818	protein_coding	NAT8L	193.407	168.676	218.138	0.369054	0.00091574	0.00438098
		ENSG00000163481	protein_coding	RNF25	330.048	287.945	372.151	0.368964	4.47076e-06	3.71423e-05
		ENSG00000131966	protein_coding	ACTR10	358.042	312.394	403.69	0.368839	2.30719e-06	2.05354e-05
		ENSG00000184857	protein_coding	TMEM186	143.658	125.295	162.02	0.368247	0.00149672	0.00669451
		ENSG00000132879	protein_coding	FBXO44	210.841	183.965	237.717	0.368051	0.000168875	0.000978278
		ENSG00000158552	protein_coding	ZFAND2B	108.08	94.2428	121.917	0.368002	0.00499328	0.0186156
		ENSG00000006695	protein_coding	COX10	425.185	371.14	479.23	0.367882	9.81672e-07	9.52257e-06
		ENSG00000146232	protein_coding	NFKBIE	213.995	186.732	241.259	0.367877	0.000226657	0.00127145
		ENSG00000108799	protein_coding	EZH1	566.737	494.743	638.731	0.367873	5.84538e-09	8.61964e-08
		ENSG00000151366	protein_coding	NDUFC2	114.226	99.6194	128.832	0.367739	0.00733601	0.0258449
		ENSG00000136819	protein_coding	C9orf78	1155.68	1009.45	1301.91	0.366728	3.35287e-12	7.66111e-11
		ENSG00000142039	protein_coding	CCDC97	425.531	371.684	479.378	0.366217	2.68091e-07	2.9335e-06
		ENSG00000116752	protein_coding	BCAS2	797.268	696.517	898.019	0.366124	5.26267e-11	1.03366e-09
		ENSG00000158792	protein_coding	SPATA2L	172.885	150.956	194.815	0.365842	0.000724804	0.0035554
		ENSG00000117395	protein_coding	EBNA1BP2	1872.49	1636.33	2108.65	0.365661	5.60015e-17	2.08182e-15
		ENSG00000141179	protein_coding	PCTP	231.297	202.022	260.573	0.365577	0.00014586	0.000857639
		ENSG00000167747	transcribed_unitary_pseudogene	C19orf48	1020.8	892.031	1149.58	0.365575	7.35798e-13	1.84388e-11
		ENSG00000112078	protein_coding	KCTD20	1424.17	1244.7	1603.65	0.365298	3.54686e-16	1.23407e-14
		ENSG00000104980	protein_coding	TIMM44	1024.2	895.178	1153.22	0.365067	2.59048e-13	6.80557e-12
		ENSG00000179361	protein_coding	ARID3B	349.12	305.078	393.162	0.364887	2.73938e-06	2.39022e-05
		ENSG00000122965	protein_coding	RBM19	1445.67	1263.71	1627.62	0.364844	4.49983e-13	1.15338e-11
		ENSG00000173465	protein_coding	ZNRD2	313.796	274.224	353.368	0.364641	7.1311e-06	5.66719e-05
		ENSG00000125952	protein_coding	MAX	943.753	825.215	1062.29	0.363948	1.07601e-10	2.02458e-09
		ENSG00000164442	protein_coding	CITED2	218.515	190.976	246.054	0.363898	0.00121953	0.00561577
		ENSG00000169914	protein_coding	OTUD3	1415.29	1237.63	1592.96	0.36387	7.09332e-15	2.18376e-13
		ENSG00000063587	protein_coding	ZNF275	502.553	439.388	565.718	0.363855	3.99423e-08	5.06879e-07
		ENSG00000089289	protein_coding	IGBP1	598.578	523.477	673.68	0.363322	2.15816e-09	3.35272e-08
		ENSG00000165195	protein_coding	PIGA	228.908	200.113	257.704	0.363295	0.000107911	0.000654618
		ENSG00000113328	protein_coding	CCNG1	1380.08	1207.16	1553	0.36318	6.10784e-15	1.90122e-13
		ENSG00000162430	protein_coding	SELENON	606.86	530.783	682.936	0.363025	2.02883e-09	3.1664e-08
		ENSG00000112149	protein_coding	CD83	312.549	273.333	351.766	0.362784	1.08755e-05	8.32092e-05
		ENSG00000169612	protein_coding	RAMAC	234.897	205.422	264.371	0.362416	7.72199e-05	0.000486852
		ENSG00000251493	protein_coding	FOXD1	552.282	483.19	621.375	0.362211	6.45423e-09	9.42665e-08
		ENSG00000139239	processed_pseudogene	RPL14P1	202.579	177.193	227.965	0.361685	0.000759303	0.00369985
		ENSG00000104524	protein_coding	PYCR3	192.243	168.182	216.304	0.361131	0.000354793	0.00189734
		ENSG00000067082	protein_coding	KLF6	1891.06	1655.5	2126.63	0.361105	2.73282e-12	6.29559e-11
		ENSG00000162729	protein_coding	IGSF8	133.166	116.464	149.868	0.361061	0.00388563	0.0150561
		ENSG00000164494	protein_coding	PDSS2	426.444	373.275	479.612	0.360777	2.13222e-07	2.37163e-06
		ENSG00000185721	protein_coding	DRG1	735.864	644.33	827.399	0.360289	5.4341e-11	1.06407e-09
		ENSG00000179094	protein_coding	PER1	825.083	722.514	927.652	0.360118	2.50334e-11	5.13475e-10
		ENSG00000285976	protein_coding	AL135905.2	103.404	90.4553	116.354	0.359724	0.0104576	0.0349765
		ENSG00000204524	protein_coding	ZNF805	521.601	456.807	586.395	0.359593	5.81519e-08	7.23248e-07
		ENSG00000136897	protein_coding	MRPL50	1730.11	1515.89	1944.33	0.358897	2.6134e-12	6.04528e-11
		ENSG00000157985	protein_coding	AGAP1	1171.64	1026.59	1316.69	0.358742	1.95171e-10	3.5455e-09
		ENSG00000103540	protein_coding	CCP110	1935.96	1696.8	2175.11	0.358083	1.65777e-19	7.66944e-18
		ENSG00000137124	protein_coding	ALDH1B1	785.531	688.436	882.627	0.35802	2.31174e-10	4.13267e-09
		ENSG00000103326	protein_coding	CAPN15	569.922	499.517	640.328	0.357642	3.66507e-08	4.67928e-07
		ENSG00000103111	protein_coding	MON1B	597.457	523.752	671.162	0.357172	1.35953e-08	1.86894e-07
		ENSG00000163913	protein_coding	IFT122	431.655	378.5	484.809	0.35629	7.36505e-07	7.31294e-06
		ENSG00000173638	protein_coding	SLC19A1	614.191	538.669	689.713	0.356013	3.16569e-09	4.82882e-08
		ENSG00000163545	protein_coding	NUAK2	120.369	105.48	135.257	0.355738	0.00506362	0.018832
		ENSG00000256235	protein_coding	SMIM3	149.341	130.904	167.777	0.355627	0.00163401	0.00721636
		ENSG00000104886	protein_coding	PLEKHJ1	333.533	292.531	374.534	0.355434	6.42315e-06	5.16058e-05
		ENSG00000133398	protein_coding	MED10	388.671	340.931	436.412	0.355289	3.96875e-06	3.33336e-05
		ENSG00000104689	protein_coding	TNFRSF10A	1414.45	1241.31	1587.58	0.354711	3.22029e-14	9.19148e-13
		ENSG00000163719	protein_coding	MTMR14	587.311	515.352	659.27	0.354701	9.91653e-09	1.39744e-07
		ENSG00000124374	protein_coding	PAIP2B	109.37	95.8765	122.864	0.354535	0.00743779	0.0261378
		ENSG00000182704	protein_coding	TSKU	150.821	132.278	169.363	0.354168	0.00233557	0.00979357
		ENSG00000215012	protein_coding	RTL10	347.024	304.524	389.524	0.354125	7.31929e-06	5.79487e-05
		ENSG00000157933	protein_coding	SKI	1481.51	1300.69	1662.34	0.353696	2.63776e-16	9.29286e-15
		ENSG00000130684	protein_coding	ZNF337	394.474	346.248	442.699	0.353617	1.14951e-06	1.09489e-05
		ENSG00000161999	protein_coding	JMJD8	908.089	797.276	1018.9	0.35347	6.79168e-11	1.31462e-09
		ENSG00000173812	protein_coding	EIF1	2315.54	2033.41	2597.67	0.353162	1.68166e-18	7.09752e-17
		ENSG00000074855	protein_coding	ANO8	147.891	129.795	165.988	0.35244	0.00190409	0.00821121
		ENSG00000138621	protein_coding	PPCDC	164.787	144.64	184.934	0.352383	0.00103609	0.00488186
		ENSG00000171574	protein_coding	ZNF584	346.873	304.7	389.045	0.351522	1.63447e-05	0.000120774
		ENSG00000141084	protein_coding	RANBP10	445.555	391.456	499.655	0.351284	5.51309e-07	5.64379e-06
		ENSG00000119630	protein_coding	PGF	99.2973	87.1548	111.44	0.351044	0.0114219	0.0376335
		ENSG00000187866	protein_coding	FAM122A	105.058	92.2185	117.898	0.351038	0.00774578	0.0270676
		ENSG00000164332	protein_coding	UBLCP1	1132.2	995.034	1269.36	0.350967	4.66822e-12	1.03574e-10
		ENSG00000115641	protein_coding	FHL2	787.003	691.742	882.263	0.350525	1.47206e-09	2.34527e-08
		ENSG00000115317	protein_coding	HTRA2	209.661	184.211	235.111	0.350294	0.000321159	0.00173566
		ENSG00000126088	protein_coding	UROD	395.137	347.298	442.975	0.350156	2.83218e-06	2.46225e-05
		ENSG00000153904	protein_coding	DDAH1	857.983	754.289	961.677	0.350023	1.1728e-10	2.19201e-09
		ENSG00000185252	protein_coding	ZNF74	231.614	203.537	259.69	0.349974	0.000146987	0.000863061
		ENSG00000169925	protein_coding	BRD3	500.406	439.92	560.891	0.349772	1.18121e-07	1.38617e-06
		ENSG00000080819	protein_coding	CPOX	4095.89	3601.93	4589.85	0.349589	2.91589e-27	2.21187e-25
		ENSG00000186230	protein_coding	ZNF749	208.703	183.436	233.97	0.349354	0.000291062	0.00158727
		ENSG00000006744	protein_coding	ELAC2	2670.42	2348.97	2991.88	0.348892	1.75081e-21	9.21365e-20
		ENSG00000160972	protein_coding	PPP1R16A	488.533	429.633	547.434	0.34886	1.92231e-07	2.15668e-06
		ENSG00000099889	protein_coding	ARVCF	227.27	199.807	254.733	0.348827	0.000400274	0.00211106
		ENSG00000023608	protein_coding	SNAPC1	440.306	387.224	493.389	0.348757	3.42971e-06	2.92616e-05
		ENSG00000048392	protein_coding	RRM2B	1925.57	1693.96	2157.18	0.348558	8.56155e-16	2.89511e-14
		ENSG00000177238	protein_coding	TRIM72	628.402	552.779	704.025	0.348364	3.00092e-08	3.89935e-07
		ENSG00000135549	protein_coding	PKIB	240.867	211.81	269.924	0.348325	0.000437047	0.00227719
		ENSG00000106012	protein_coding	IQCE	697.657	613.947	781.367	0.347385	5.86497e-10	9.90633e-09
		ENSG00000131018	protein_coding	SYNE1	405.336	356.657	454.016	0.347341	2.39054e-05	0.000170147
		ENSG00000224870	lncRNA	MRPL20-AS1	119.264	104.873	133.655	0.346936	0.00694032	0.0246884
		ENSG00000173281	protein_coding	PPP1R3B	310.421	273.212	347.631	0.346409	4.6238e-05	0.000308376
		ENSG00000171612	protein_coding	SLC25A33	273.326	240.554	306.099	0.346361	4.35167e-05	0.000291961
		ENSG00000140395	protein_coding	WDR61	475.909	418.971	532.847	0.346135	1.83909e-07	2.07715e-06
		ENSG00000169155	protein_coding	ZBTB43	571.634	503.317	639.952	0.345885	1.28023e-08	1.76714e-07
		ENSG00000112031	protein_coding	MTRF1L	740.957	652.527	829.387	0.345538	8.59337e-10	1.42293e-08
		ENSG00000149573	protein_coding	MPZL2	223.763	196.976	250.55	0.345519	0.000183097	0.00105306
		ENSG00000160193	protein_coding	WDR4	380.767	335.28	426.254	0.345433	1.1783e-05	8.944e-05
		ENSG00000126067	protein_coding	PSMB2	1205.89	1062.18	1349.6	0.345222	4.40386e-12	9.86184e-11
		ENSG00000119661	protein_coding	DNAL1	377.259	332.251	422.267	0.34496	4.75411e-06	3.92416e-05
		ENSG00000214114	protein_coding	MYCBP	351.26	309.446	393.075	0.344129	4.88888e-05	0.000323747
		ENSG00000107798	protein_coding	LIPA	335.183	295.279	375.087	0.344112	7.71561e-05	0.000486632
		ENSG00000174744	protein_coding	BRMS1	573.59	505.402	641.778	0.344038	3.55813e-08	4.54621e-07
		ENSG00000224470	protein_coding	ATXN1L	854.503	753.096	955.91	0.343634	8.55518e-11	1.63584e-09
		ENSG00000110442	protein_coding	COMMD9	230.559	203.128	257.991	0.343429	0.000278625	0.00152637
		ENSG00000213859	protein_coding	KCTD11	144.269	127.085	161.452	0.34291	0.0046102	0.0173915
		ENSG00000206075	protein_coding	SERPINB5	627.258	552.952	701.563	0.342866	9.71489e-09	1.37363e-07
		ENSG00000104885	protein_coding	DOT1L	1203.57	1061.16	1345.98	0.342719	2.23169e-12	5.21244e-11
		ENSG00000167173	protein_coding	C15orf39	286.919	252.923	320.915	0.34229	3.63686e-05	0.000249876
		ENSG00000119231	protein_coding	SENP5	771.779	680.556	863.001	0.3422	3.72171e-07	3.95917e-06
		ENSG00000116649	protein_coding	SRM	439.718	387.73	491.705	0.341955	7.54353e-07	7.46814e-06
		ENSG00000100147	protein_coding	CCDC134	248.918	219.457	278.378	0.341724	0.00016113	0.000938577
		ENSG00000101255	protein_coding	TRIB3	192.058	169.303	214.813	0.341673	0.000650967	0.00323085
		ENSG00000164953	protein_coding	TMEM67	828.997	731.276	926.717	0.341298	3.43618e-10	5.9964e-09
		ENSG00000179041	protein_coding	RRS1	625.641	551.9	699.383	0.341124	3.68663e-08	4.70325e-07
		ENSG00000103591	protein_coding	AAGAB	1764.95	1557.14	1972.76	0.341121	1.18412e-15	3.96432e-14
		ENSG00000135953	protein_coding	MFSD9	188.454	166.174	210.734	0.340897	0.000628025	0.0031299
		ENSG00000139405	protein_coding	RITA1	195.148	172.088	218.207	0.340785	0.000537121	0.00273266
		ENSG00000012232	protein_coding	EXTL3	1416.82	1250.34	1583.3	0.34037	7.61301e-15	2.33097e-13
		ENSG00000079974	protein_coding	RABL2B	168.762	148.83	188.694	0.340345	0.00145989	0.00655764
		ENSG00000136045	protein_coding	PWP1	1629.84	1438.47	1821.21	0.340154	6.7636e-13	1.70763e-11
		ENSG00000133477	protein_coding	FAM83F	465.128	410.447	519.809	0.340046	3.45797e-06	2.94697e-05
		ENSG00000114744	protein_coding	COMMD2	506.1	446.613	565.586	0.340043	2.63495e-07	2.89072e-06
		ENSG00000100284	protein_coding	TOM1	233.088	205.63	260.546	0.340013	0.00025122	0.00139346
		ENSG00000136816	protein_coding	TOR1B	386.086	340.684	431.489	0.340001	3.30774e-06	2.83014e-05
		ENSG00000145919	protein_coding	BOD1	737.264	650.688	823.839	0.339931	1.88112e-09	2.95504e-08
		ENSG00000254615	lncRNA	AC027031.2	103.241	91.0169	115.465	0.339929	0.0104873	0.035027
		ENSG00000196177	protein_coding	ACADSB	454.97	401.555	508.386	0.339574	1.06068e-06	1.01835e-05
		ENSG00000177613	protein_coding	CSTF2T	704.838	622.191	787.484	0.339406	3.66017e-09	5.52801e-08
		ENSG00000163818	protein_coding	LZTFL1	307.446	271.35	343.542	0.339214	2.99409e-05	0.0002093
		ENSG00000261373	lncRNA	VPS9D1-AS1	389.899	344.167	435.631	0.339119	2.8825e-06	2.50213e-05
		ENSG00000172890	protein_coding	NADSYN1	493.011	435.228	550.794	0.339048	2.70033e-07	2.95091e-06
		ENSG00000162231	protein_coding	NXF1	944.532	833.982	1055.08	0.338906	3.71709e-11	7.41655e-10
		ENSG00000149091	protein_coding	DGKZ	1171.73	1034.63	1308.83	0.338863	2.00369e-12	4.71259e-11
		ENSG00000111845	protein_coding	PAK1IP1	931.71	822.726	1040.69	0.338694	2.4641e-10	4.38642e-09
		ENSG00000124688	protein_coding	MAD2L1BP	225.557	199.085	252.03	0.338692	0.000574473	0.00289992
		ENSG00000113068	protein_coding	PFDN1	441.426	389.734	493.119	0.338672	6.48713e-07	6.51809e-06
		ENSG00000146066	protein_coding	HIGD2A	167.589	147.901	187.277	0.338504	0.00133413	0.00605083
		ENSG00000147457	protein_coding	CHMP7	1054.34	931.19	1177.49	0.338247	1.05044e-12	2.56741e-11
		ENSG00000172007	protein_coding	RAB33B	228.571	201.788	255.353	0.338159	0.000242483	0.00135034
		ENSG00000131100	protein_coding	ATP6V1E1	1216.28	1074.27	1358.29	0.338151	1.4505e-12	3.47954e-11
		ENSG00000225648	transcribed_unprocessed_pseudogene	SBDSP1	512.685	452.796	572.575	0.337939	3.17945e-07	3.43217e-06
		ENSG00000177225	protein_coding	GATD1	772.846	682.723	862.97	0.337568	3.77702e-09	5.69937e-08
		ENSG00000178381	protein_coding	ZFAND2A	239.035	211.081	266.989	0.337557	0.000200389	0.00114082
		ENSG00000173141	protein_coding	MRPL57	284.058	250.925	317.19	0.336895	0.000128306	0.000764029
		ENSG00000099904	protein_coding	ZDHHC8	297.133	262.488	331.778	0.336824	0.000111225	0.000673026
		ENSG00000136521	protein_coding	NDUFB5	734.734	649.25	820.218	0.336772	1.59262e-09	2.52302e-08
		ENSG00000144048	protein_coding	DUSP11	509.055	449.794	568.317	0.336763	4.25957e-07	4.47481e-06
		ENSG00000117362	protein_coding	APH1A	481.413	425.404	537.422	0.336514	5.44683e-07	5.58275e-06
		ENSG00000159111	protein_coding	MRPL10	728.284	643.745	812.822	0.335985	1.65827e-09	2.62193e-08
		ENSG00000084463	protein_coding	WBP11	2354.31	2081.48	2627.13	0.335731	3.64917e-16	1.26705e-14
		ENSG00000101019	protein_coding	UQCC1	626.899	554.234	699.563	0.33542	2.11959e-08	2.82165e-07
		ENSG00000112996	protein_coding	MRPS30	824.817	729.273	920.362	0.335333	2.50729e-09	3.87365e-08
		ENSG00000169021	protein_coding	UQCRFS1	723.048	639.409	806.687	0.334803	6.35256e-09	9.28621e-08
		ENSG00000140931	protein_coding	CMTM3	153.416	135.587	171.246	0.334651	0.00392248	0.015178
		ENSG00000174851	protein_coding	YIF1A	132.309	116.917	147.701	0.334637	0.00659147	0.0236071
		ENSG00000112592	protein_coding	TBP	548.061	484.714	611.409	0.334389	2.55614e-07	2.80792e-06
		ENSG00000135446	protein_coding	CDK4	870.602	770.095	971.109	0.334209	2.53251e-10	4.49393e-09
		ENSG00000186312	transcribed_unprocessed_pseudogene	CA5BP1	112.317	99.265	125.368	0.333819	0.0095612	0.0324095
		ENSG00000127445	protein_coding	PIN1	331.798	293.474	370.122	0.333754	5.30192e-05	0.000348087
		ENSG00000103966	protein_coding	EHD4	1018.6	901.186	1136.01	0.33375	8.93963e-12	1.945e-10
		ENSG00000162139	protein_coding	NEU3	601.219	531.939	670.498	0.333414	6.34217e-08	7.81288e-07
		ENSG00000163482	protein_coding	STK36	226.58	200.417	252.742	0.333176	0.00094825	0.00451599
		ENSG00000106400	protein_coding	ZNHIT1	422.97	374.246	471.693	0.333066	2.92344e-06	2.53505e-05
		ENSG00000197296	protein_coding	FITM2	104.456	92.3378	116.574	0.333035	0.013544	0.0432379
		ENSG00000127870	protein_coding	RNF6	1500.89	1328.31	1673.47	0.33302	8.03419e-13	2.00142e-11
		ENSG00000170043	protein_coding	TRAPPC1	215.208	190.393	240.023	0.332635	0.000627065	0.00312745
		ENSG00000103343	protein_coding	ZNF174	147.364	130.342	164.386	0.332512	0.00363202	0.0142207
		ENSG00000171067	protein_coding	C11orf24	428.251	379.017	477.485	0.33241	6.54142e-06	5.24061e-05
		ENSG00000146376	protein_coding	ARHGAP18	2312.38	2047.09	2577.67	0.332346	7.5135e-14	2.06744e-12
		ENSG00000177674	protein_coding	AGTRAP	133.624	118.189	149.06	0.332286	0.00578932	0.0211985
		ENSG00000106348	protein_coding	IMPDH1	1204.41	1066.3	1342.52	0.332048	3.10145e-12	7.10591e-11
		ENSG00000064666	protein_coding	CNN2	2271.39	2011.11	2531.67	0.33195	3.2044e-16	1.12187e-14
		ENSG00000218890	processed_pseudogene	NUFIP1P1	141.425	125.116	157.734	0.331855	0.00719572	0.0254571
		ENSG00000066855	protein_coding	MTFR1	915.359	810.457	1020.26	0.331765	5.68968e-11	1.11153e-09
		ENSG00000077463	protein_coding	SIRT6	159.446	141.099	177.794	0.331405	0.00336829	0.0133275
		ENSG00000114902	protein_coding	SPCS1	481.687	426.495	536.88	0.331377	4.65653e-07	4.82857e-06
		ENSG00000085978	protein_coding	ATG16L1	1073.76	950.879	1196.64	0.33135	1.6994e-12	4.04208e-11
		ENSG00000122696	protein_coding	SLC25A51	199.277	176.38	222.173	0.331319	0.000880268	0.0042293
		ENSG00000144182	protein_coding	LIPT1	202.463	179.212	225.715	0.331183	0.000974554	0.00462035
		ENSG00000103174	protein_coding	NAGPA	188.556	166.903	210.209	0.331043	0.00113812	0.00529153
		ENSG00000146278	protein_coding	PNRC1	317.591	281.206	353.976	0.330971	0.000112599	0.000681092
		ENSG00000232445	lncRNA	EMSLR	174.37	154.37	194.37	0.330505	0.00190314	0.00821121
		ENSG00000109321	protein_coding	AREG	2299.8	2037.49	2562.1	0.330388	9.94331e-05	0.000609779
		ENSG00000135631	protein_coding	RAB11FIP5	472.519	418.604	526.433	0.32996	5.43054e-06	4.42644e-05
		ENSG00000274523	protein_coding	RCC1L	496.214	439.609	552.818	0.329912	4.83893e-07	5.00538e-06
		ENSG00000140463	protein_coding	BBS4	306.012	271.065	340.959	0.329873	5.27642e-05	0.000346684
		ENSG00000126391	protein_coding	FRMD8	383.152	339.436	426.867	0.329777	8.46062e-06	6.62067e-05
		ENSG00000008283	protein_coding	CYB561	518.811	459.659	577.963	0.329772	9.23271e-07	8.99241e-06
		ENSG00000276023	protein_coding	DUSP14	343.154	304.013	382.296	0.329588	1.86943e-05	0.000136223
		ENSG00000160908	protein_coding	ZNF394	379.365	336.143	422.586	0.329293	2.99929e-05	0.000209577
		ENSG00000086015	protein_coding	MAST2	1073.82	951.72	1195.93	0.329211	6.10967e-10	1.03018e-08
		ENSG00000224051	protein_coding	CPTP	106.128	93.9596	118.296	0.329159	0.0146333	0.0462076
		ENSG00000135924	protein_coding	DNAJB2	386.412	342.456	430.369	0.328798	1.29804e-05	9.75415e-05
		ENSG00000149582	protein_coding	TMEM25	203.138	179.984	226.291	0.32868	0.0011789	0.00544956
		ENSG00000174109	protein_coding	C16orf91	105.733	93.6349	117.832	0.328477	0.0121682	0.0395262
		ENSG00000177051	protein_coding	FBXO46	204.992	181.666	228.318	0.328145	0.000805791	0.00390715
		ENSG00000163155	protein_coding	LYSMD1	112.961	100.063	125.86	0.327981	0.0100671	0.0339126
		ENSG00000166579	protein_coding	NDEL1	1074.28	952.607	1195.94	0.32789	2.36755e-11	4.87402e-10
		ENSG00000119523	protein_coding	ALG2	484.423	429.514	539.332	0.327787	1.82094e-06	1.65845e-05
		ENSG00000118242	protein_coding	MREG	358.654	317.972	399.336	0.327779	4.71414e-05	0.000313889
		ENSG00000112651	protein_coding	MRPL2	157.352	139.445	175.26	0.327705	0.00284905	0.0115665
		ENSG00000243147	protein_coding	MRPL33	156.627	138.812	174.443	0.327519	0.00723418	0.0255771
		ENSG00000005007	protein_coding	UPF1	2368.63	2100.89	2636.38	0.327417	4.71213e-17	1.75948e-15
		ENSG00000182318	protein_coding	ZSCAN22	158.351	140.355	176.348	0.327268	0.00254005	0.0105019
		ENSG00000003509	protein_coding	NDUFAF7	468.32	415.408	521.231	0.326692	1.43865e-06	1.34146e-05
		ENSG00000189306	protein_coding	RRP7A	1268.43	1125.34	1411.52	0.326626	4.4058e-13	1.131e-11
		ENSG00000166452	protein_coding	AKIP1	189.626	168.156	211.097	0.326367	0.0012328	0.00566296
		ENSG00000158769	protein_coding	F11R	655.493	581.559	729.427	0.326335	4.88268e-08	6.12244e-07
		ENSG00000117984	protein_coding	CTSD	152.69	135.388	169.993	0.326216	0.0056938	0.0209079
		ENSG00000072803	protein_coding	FBXW11	785.918	697.388	874.447	0.325991	1.11211e-08	1.54905e-07
		ENSG00000177981	protein_coding	ASB8	263.173	233.456	292.889	0.325956	0.000159902	0.00093207
		ENSG00000148400	protein_coding	NOTCH1	899.291	798.151	1000.43	0.325523	9.64431e-10	1.5814e-08
		ENSG00000177640	lncRNA	CASC2	104.897	93.0131	116.781	0.32517	0.0158352	0.0492183
		ENSG00000102978	protein_coding	POLR2C	857.128	760.833	953.422	0.325153	8.99042e-10	1.4843e-08
		ENSG00000162585	protein_coding	FAAP20	299.986	266.233	333.738	0.324934	0.000132649	0.000788088
		ENSG00000109519	protein_coding	GRPEL1	976.604	867.024	1086.18	0.324788	7.7492e-09	1.11345e-07
		ENSG00000162852	protein_coding	CNST	545.97	484.664	607.276	0.324769	4.87745e-07	5.03904e-06
		ENSG00000100578	protein_coding	KIAA0586	887.01	787.487	986.533	0.324741	1.22489e-08	1.69492e-07
		ENSG00000211460	protein_coding	TSN	1000.31	888.135	1112.48	0.324598	3.61825e-10	6.29456e-09
		ENSG00000171135	protein_coding	JAGN1	222.738	197.676	247.8	0.32457	0.000675206	0.00333715
		ENSG00000132002	protein_coding	DNAJB1	1642.49	1458.46	1826.52	0.324457	2.56107e-11	5.2404e-10
		ENSG00000204619	protein_coding	PPP1R11	716.603	636.297	796.908	0.324256	2.44584e-08	3.22285e-07
		ENSG00000090615	protein_coding	GOLGA3	1952.25	1733.69	2170.81	0.324223	9.06829e-15	2.7565e-13
		ENSG00000068028	protein_coding	RASSF1	287.642	255.352	319.932	0.324139	0.000135836	0.000804315
		ENSG00000136522	protein_coding	MRPL47	630.279	559.671	700.886	0.324084	4.76139e-07	4.93074e-06
		ENSG00000135677	protein_coding	GNS	1117.34	992.351	1242.32	0.323823	7.52313e-12	1.64746e-10
		ENSG00000168061	protein_coding	SAC3D1	155.15	137.705	172.596	0.32371	0.00325658	0.0129342
		ENSG00000132698	protein_coding	RAB25	155.947	138.432	173.463	0.323358	0.00350711	0.0137958
		ENSG00000183520	protein_coding	UTP11	956.602	849.888	1063.32	0.322887	5.80439e-11	1.13132e-09
		ENSG00000157617	protein_coding	C2CD2	832.17	739.402	924.939	0.322609	1.47377e-09	2.34578e-08
		ENSG00000144560	protein_coding	VGLL4	479.038	425.602	532.474	0.322528	1.54373e-06	1.42759e-05
		ENSG00000102547	protein_coding	CAB39L	107.576	95.4959	119.656	0.322356	0.0143141	0.0454039
		ENSG00000130517	protein_coding	PGPEP1	328.377	291.739	365.014	0.322285	3.35526e-05	0.000232713
		ENSG00000175115	protein_coding	PACS1	706.798	628.158	785.439	0.321912	1.72635e-08	2.33883e-07
		ENSG00000127993	protein_coding	RBM48	370.103	328.917	411.289	0.321551	1.9053e-05	0.000138597
		ENSG00000117877	protein_coding	CD3EAP	1157.68	1029.11	1286.25	0.321498	5.71366e-08	7.11672e-07
		ENSG00000168495	protein_coding	POLR3D	1038.14	922.835	1153.45	0.321497	1.1844e-09	1.91782e-08
		ENSG00000112855	protein_coding	HARS2	764.509	679.597	849.422	0.321378	1.40908e-08	1.93075e-07
		ENSG00000163597	lncRNA	SNHG16	2871.29	2552.75	3189.83	0.321315	8.37045e-16	2.8419e-14
		ENSG00000118965	protein_coding	WDR35	477.139	424.143	530.136	0.321133	1.13441e-06	1.08297e-05
		ENSG00000170291	protein_coding	ELP5	497.256	442.035	552.478	0.321106	2.78517e-06	2.42514e-05
		ENSG00000205659	protein_coding	LIN52	266.895	237.212	296.579	0.321027	0.000263143	0.00145337
		ENSG00000107815	protein_coding	TWNK	1888.06	1678.96	2097.17	0.320701	4.41452e-12	9.87259e-11
		ENSG00000068438	protein_coding	FTSJ1	747.925	665.039	830.81	0.320646	7.57174e-09	1.09159e-07
		ENSG00000114473	protein_coding	IQCG	209.879	186.562	233.197	0.320352	0.000855783	0.00413171
		ENSG00000237190	protein_coding	CDKN2AIPNL	376.03	334.371	417.688	0.320117	1.95962e-05	0.000141875
		ENSG00000234851	processed_pseudogene	RPL23AP42	103.692	92.1324	115.251	0.319885	0.0152622	0.047808
		ENSG00000169230	protein_coding	PRELID1	1403.74	1248.7	1558.77	0.319748	2.19008e-11	4.53083e-10
		ENSG00000183530	protein_coding	PRR14L	3282.57	2920.56	3644.58	0.319408	5.70926e-15	1.78044e-13
		ENSG00000111361	protein_coding	EIF2B1	680.953	605.77	756.136	0.319404	1.1125e-07	1.30919e-06
		ENSG00000121417	protein_coding	ZNF211	159.709	141.994	177.424	0.319351	0.00334908	0.013264
		ENSG00000138663	protein_coding	COPS4	836.381	744.085	928.678	0.319326	4.62944e-07	4.80639e-06
		ENSG00000113583	protein_coding	C5orf15	382.32	340.107	424.532	0.319042	1.75269e-05	0.000128895
		ENSG00000259494	protein_coding	MRPL46	122.629	109.018	136.239	0.318957	0.0119066	0.0388428
		ENSG00000136875	protein_coding	PRPF4	1487.17	1323.41	1650.92	0.318793	4.96541e-14	1.39363e-12
		ENSG00000142634	protein_coding	EFHD2	1730.15	1539.81	1920.49	0.318534	4.66101e-15	1.47263e-13
		ENSG00000070718	protein_coding	AP3M2	680.533	605.633	755.433	0.318388	2.90504e-07	3.16026e-06
		ENSG00000136854	protein_coding	STXBP1	590.662	525.666	655.658	0.318254	2.06e-07	2.29586e-06
		ENSG00000156958	protein_coding	GALK2	292.751	260.486	325.016	0.318212	0.000114237	0.000689271
		ENSG00000205629	protein_coding	LCMT1	351.855	313.11	390.599	0.318108	4.55777e-05	0.000304454
		ENSG00000129657	protein_coding	SEC14L1	980.822	873.059	1088.58	0.317976	1.60209e-07	1.83244e-06
		ENSG00000163156	protein_coding	SCNM1	400.892	356.802	444.983	0.317827	2.41716e-05	0.000171824
		ENSG00000122970	protein_coding	IFT81	287.535	255.883	319.187	0.317802	0.000134589	0.000798053
		ENSG00000187713	protein_coding	TMEM203	303.042	269.699	336.385	0.317707	0.000134932	0.000799808
		ENSG00000135655	protein_coding	USP15	2569.56	2287.94	2851.18	0.317384	2.24658e-15	7.27545e-14
		ENSG00000184185	protein_coding	KCNJ12	180.834	160.917	200.75	0.317314	0.00276722	0.0112736
		ENSG00000141858	protein_coding	SAMD1	707.285	629.732	784.838	0.317205	6.6484e-07	6.6682e-06
		ENSG00000186480	protein_coding	INSIG1	1263.54	1125.2	1401.88	0.31693	2.9508e-11	5.99414e-10
		ENSG00000072518	protein_coding	MARK2	1239.06	1103.49	1374.62	0.316704	9.75977e-12	2.10981e-10
		ENSG00000177971	protein_coding	IMP3	325.327	289.674	360.98	0.316506	0.000114678	0.000691684
		ENSG00000006194	protein_coding	ZNF263	880.634	784.4	976.867	0.316211	3.79583e-08	4.83524e-07
		ENSG00000238227	protein_coding	TMEM250	229.684	204.52	254.847	0.316002	0.000604488	0.00303144
		ENSG00000171453	protein_coding	POLR1C	599.876	534.393	665.358	0.315699	1.55489e-07	1.78732e-06
		ENSG00000138640	protein_coding	FAM13A	584.254	520.482	648.026	0.315659	3.90006e-07	4.13323e-06
		ENSG00000175130	protein_coding	MARCKSL1	723.164	644.275	802.054	0.315583	1.91596e-07	2.15099e-06
		ENSG00000109083	protein_coding	IFT20	222.532	198.182	246.881	0.315556	0.00182443	0.00792864
		ENSG00000122550	protein_coding	KLHL7	481.781	429.344	534.218	0.314637	2.72208e-06	2.37758e-05
		ENSG00000128626	protein_coding	MRPS12	219.501	195.555	243.447	0.314588	0.00122272	0.00562892
		ENSG00000147119	protein_coding	CHST7	173.421	154.481	192.361	0.314565	0.00389101	0.0150701
		ENSG00000197345	protein_coding	MRPL21	468.194	417.313	519.075	0.314137	5.00774e-06	4.1177e-05
		ENSG00000241506	processed_pseudogene	PSMC1P1	197.853	176.333	219.373	0.313485	0.00237261	0.00992544
		ENSG00000140259	protein_coding	MFAP1	858.426	765.449	951.402	0.313381	2.08006e-07	2.31514e-06
		ENSG00000006625	protein_coding	GGCT	342.286	305.157	379.416	0.313309	4.78822e-05	0.000317705
		ENSG00000148296	protein_coding	SURF6	1033.94	922.043	1145.83	0.313182	1.65707e-08	2.2504e-07
		ENSG00000048162	protein_coding	NOP16	581.762	518.756	644.768	0.313179	6.67913e-06	5.33823e-05
		ENSG00000114353	protein_coding	GNAI2	1705.82	1521.48	1890.16	0.312844	1.63027e-12	3.88864e-11
		ENSG00000082515	protein_coding	MRPL22	368.591	328.68	408.501	0.312802	5.29155e-05	0.000347542
		ENSG00000178913	protein_coding	TAF7	1208.47	1077.97	1338.96	0.312536	3.13318e-11	6.3189e-10
		ENSG00000117133	protein_coding	RPF1	973.379	868.279	1078.48	0.312446	8.69619e-09	1.24316e-07
		ENSG00000154719	protein_coding	MRPL39	741.852	661.751	821.952	0.31234	3.09634e-08	4.00787e-07
		ENSG00000150977	protein_coding	RILPL2	114.162	101.745	126.578	0.312308	0.0158198	0.0491885
		ENSG00000089234	protein_coding	BRAP	803.981	717.216	890.746	0.312216	5.53409e-09	8.18209e-08
		ENSG00000134758	protein_coding	RNF138	854.287	762.121	946.453	0.312143	4.25386e-09	6.37889e-08
		ENSG00000106591	protein_coding	MRPL32	325.496	290.335	360.657	0.311944	7.70011e-05	0.000486019
		ENSG00000100814	protein_coding	CCNB1IP1	614.902	548.602	681.201	0.311808	2.38855e-07	2.63278e-06
		ENSG00000115758	protein_coding	ODC1	3728.61	3327.24	4129.98	0.311725	5.73714e-19	2.51597e-17
		ENSG00000136840	protein_coding	ST6GALNAC4	205.121	182.975	227.266	0.31121	0.00131738	0.00598616
		ENSG00000116205	protein_coding	TCEANC2	245.727	219.297	272.157	0.310281	0.000545708	0.00277133
		ENSG00000264522	protein_coding	OTUD7B	1445.28	1290.56	1599.99	0.309849	1.73786e-12	4.12191e-11
		ENSG00000104946	protein_coding	TBC1D17	157.752	140.774	174.731	0.30978	0.00635152	0.0228888
		ENSG00000116688	protein_coding	MFN2	3152.63	2815.43	3489.83	0.309699	9.72212e-17	3.52846e-15
		ENSG00000101928	protein_coding	MOSPD1	1026.46	916.642	1136.27	0.309574	6.30508e-10	1.05966e-08
		ENSG00000198585	protein_coding	NUDT16	374.479	334.374	414.585	0.309375	0.000262932	0.00145268
		ENSG00000148468	protein_coding	FAM171A1	1242.09	1109.33	1374.85	0.309336	1.45798e-11	3.08061e-10
		ENSG00000075975	protein_coding	MKRN2	603.463	538.919	668.008	0.30928	9.95727e-07	9.64586e-06
		ENSG00000165283	protein_coding	STOML2	1145.69	1023.52	1267.87	0.308606	9.39523e-11	1.78171e-09
		ENSG00000144597	protein_coding	EAF1	1215.32	1085.93	1344.71	0.308109	1.16961e-10	2.18847e-09
		ENSG00000083457	protein_coding	ITGAE	134.551	120.132	148.969	0.308093	0.0104263	0.0349201
		ENSG00000013275	protein_coding	PSMC4	1741.95	1556.69	1927.2	0.307845	4.48531e-12	9.9779e-11
		ENSG00000198715	protein_coding	GLMP	193.012	172.392	213.632	0.307826	0.00250989	0.0104002
		ENSG00000133639	protein_coding	BTG1	248.731	222.205	275.258	0.307645	0.000665164	0.0032935
		ENSG00000198258	protein_coding	UBL5	196.608	175.619	217.596	0.307623	0.00264789	0.0108704
		ENSG00000064490	protein_coding	RFXANK	130.467	116.505	144.429	0.307602	0.0102085	0.0342998
		ENSG00000105229	protein_coding	PIAS4	420.153	375.458	464.848	0.307369	2.5871e-05	0.000182977
		ENSG00000168924	protein_coding	LETM1	3514.83	3142.06	3887.6	0.30708	2.72887e-19	1.22219e-17
		ENSG00000174032	protein_coding	SLC25A30	542.599	484.981	600.217	0.306986	3.22299e-06	2.77056e-05
		ENSG00000156853	protein_coding	ZNF689	261.557	233.751	289.363	0.306727	0.000487681	0.00250765
		ENSG00000114956	protein_coding	DGUOK	348.578	311.564	385.591	0.306653	0.000135013	0.000800005
		ENSG00000117592	protein_coding	PRDX6	1440.15	1287.7	1592.6	0.306373	1.71304e-11	3.59247e-10
		ENSG00000087088	protein_coding	BAX	354.267	316.737	391.797	0.30595	7.48137e-05	0.000473824
		ENSG00000179918	protein_coding	SEPHS2	618.967	553.48	684.455	0.305927	4.58716e-07	4.76544e-06
		ENSG00000183971	protein_coding	NPW	132.192	118.129	146.254	0.305777	0.0124693	0.0403116
		ENSG00000136878	protein_coding	USP20	124.138	110.932	137.344	0.305639	0.0143238	0.0454177
		ENSG00000114779	protein_coding	ABHD14B	193.034	172.561	213.507	0.305583	0.00192393	0.00829044
		ENSG00000103671	protein_coding	TRIP4	438.862	392.453	485.271	0.305569	8.72842e-06	6.80179e-05
		ENSG00000162972	protein_coding	MAIP1	411.146	367.727	454.565	0.305105	2.02879e-05	0.000146567
		ENSG00000256294	protein_coding	ZNF225	149.348	133.518	165.177	0.304925	0.00967051	0.032734
		ENSG00000114784	protein_coding	EIF1B	354.362	316.967	391.757	0.304758	8.97368e-05	0.000556599
		ENSG00000187840	protein_coding	EIF4EBP1	408.215	365.183	451.247	0.30455	8.05668e-05	0.000505682
		ENSG00000047621	protein_coding	C12orf4	472.221	422.465	521.978	0.304505	1.10429e-05	8.43749e-05
		ENSG00000141522	protein_coding	ARHGDIA	2709.86	2425	2994.72	0.304322	4.80394e-15	1.51212e-13
		ENSG00000145725	protein_coding	PPIP5K2	2065.08	1848.01	2282.15	0.304277	3.08497e-14	8.8352e-13
		ENSG00000134248	protein_coding	LAMTOR5	222.809	199.307	246.31	0.304107	0.00186195	0.00806049
		ENSG00000225614	protein_coding	ZNF469	425.237	380.518	469.957	0.303844	0.000420279	0.00219997
		ENSG00000146409	protein_coding	SLC18B1	261.658	234.11	289.206	0.303738	0.00037637	0.00200002
		ENSG00000136936	protein_coding	XPA	235.939	211.102	260.775	0.303568	0.000966571	0.00458799
		ENSG00000196123	protein_coding	KIAA0895L	187.816	168.024	207.608	0.303565	0.00298461	0.0120126
		ENSG00000138658	protein_coding	ZGRF1	829.809	742.739	916.879	0.303508	1.22647e-07	1.43528e-06
		ENSG00000115649	protein_coding	CNPPD1	305.003	272.957	337.05	0.303288	0.000277051	0.00151873
		ENSG00000003056	protein_coding	M6PR	1699.67	1521.59	1877.76	0.303259	1.39873e-13	3.76874e-12
		ENSG00000105948	protein_coding	TTC26	324.038	290.003	358.073	0.303244	0.000164018	0.000953424
		ENSG00000169379	protein_coding	ARL13B	393.68	352.37	434.991	0.303118	3.01174e-05	0.000210272
		ENSG00000185414	protein_coding	MRPL30	722.812	647.057	798.567	0.303099	4.54027e-07	4.72548e-06
		ENSG00000108679	protein_coding	LGALS3BP	972.631	870.732	1074.53	0.303093	4.5915e-08	5.78749e-07
		ENSG00000183527	protein_coding	PSMG1	617.305	552.628	681.982	0.302932	7.05944e-07	7.03854e-06
		ENSG00000168246	protein_coding	UBTD2	582.281	521.3	643.262	0.302768	4.31107e-06	3.59043e-05
		ENSG00000143669	protein_coding	LYST	751.208	672.639	829.776	0.302484	2.12458e-05	0.000152767
		ENSG00000122643	protein_coding	NT5C3A	502.793	450.182	555.405	0.302426	5.22785e-06	4.27302e-05
		ENSG00000104823	protein_coding	ECH1	152.688	136.638	168.738	0.302424	0.0101041	0.0340237
		ENSG00000119616	protein_coding	FCF1	894.173	800.697	987.649	0.302401	3.84913e-09	5.7978e-08
		ENSG00000163138	protein_coding	PACRGL	403.987	361.711	446.263	0.302304	3.72106e-05	0.000254623
		ENSG00000068394	protein_coding	GPKOW	397.378	355.802	438.954	0.302227	4.80145e-05	0.000318332
		ENSG00000163743	protein_coding	RCHY1	511.351	457.905	564.796	0.302084	5.39877e-06	4.40268e-05
		ENSG00000135047	protein_coding	CTSL	523.589	468.879	578.3	0.302022	5.10545e-06	4.18374e-05
		ENSG00000099399	protein_coding	MAGEB2	1413.71	1266.39	1561.04	0.30157	7.36361e-11	1.42043e-09
		ENSG00000110435	protein_coding	PDHX	722.595	647.244	797.946	0.301561	1.16794e-07	1.37251e-06
		ENSG00000155876	protein_coding	RRAGA	363.01	325.105	400.914	0.30155	7.30047e-05	0.0004634
		ENSG00000103642	protein_coding	LACTB	138.593	124.075	153.111	0.301175	0.0111601	0.0368865
		ENSG00000073050	protein_coding	XRCC1	421.208	377.299	465.118	0.30117	2.27203e-05	0.000162536
		ENSG00000119328	protein_coding	ABITRAM	378.964	339.45	418.478	0.301151	8.42253e-05	0.000526096
		ENSG00000241127	protein_coding	YAE1	177.051	158.535	195.566	0.301141	0.00437878	0.0166633
		ENSG00000124839	protein_coding	RAB17	256.786	229.986	283.586	0.301063	0.000524577	0.00267372
		ENSG00000143727	protein_coding	ACP1	1502.06	1345.81	1658.32	0.301037	3.66345e-12	8.32557e-11
		ENSG00000110330	protein_coding	BIRC2	1733.77	1553.46	1914.08	0.300996	1.00011e-11	2.1537e-10
		ENSG00000101181	protein_coding	MTG2	571.107	511.684	630.53	0.300783	3.07329e-06	2.65678e-05
		ENSG00000139433	protein_coding	GLTP	544.065	487.509	600.621	0.300472	3.58892e-06	3.04164e-05
		ENSG00000109534	protein_coding	GAR1	357.025	319.879	394.171	0.300448	0.000682322	0.00336663
		ENSG00000106245	protein_coding	BUD31	739.588	662.76	816.417	0.30041	8.75912e-08	1.05209e-06
		ENSG00000162783	protein_coding	IER5	742.514	665.387	819.641	0.30039	2.51606e-07	2.7657e-06
		ENSG00000005238	protein_coding	FAM214B	121.868	109.126	134.61	0.30031	0.0152003	0.0476851
		ENSG00000138078	protein_coding	PREPL	811.031	726.876	895.187	0.300107	2.13062e-08	2.83186e-07
		ENSG00000030582	protein_coding	GRN	501.674	449.607	553.742	0.299946	1.2049e-05	9.12274e-05
		ENSG00000075234	protein_coding	TTC38	282.687	253.363	312.01	0.299321	0.000375426	0.0019969
		ENSG00000151575	protein_coding	TEX9	199.766	179.025	220.507	0.299152	0.00253403	0.0104822
		ENSG00000164080	protein_coding	RAD54L2	1154.88	1035.53	1274.22	0.298984	8.70143e-11	1.6576e-09
		ENSG00000167721	protein_coding	TSR1	3328.92	2985.23	3672.61	0.298875	1.0577e-17	4.18114e-16
		ENSG00000149639	protein_coding	SOGA1	1198.76	1074.94	1322.58	0.298843	3.97195e-11	7.88769e-10
		ENSG00000122863	protein_coding	CHST3	807.958	724.497	891.42	0.298753	4.26501e-07	4.4754e-06
		ENSG00000175832	protein_coding	ETV4	377.212	338.221	416.204	0.298526	0.000168418	0.000976092
		ENSG00000115275	protein_coding	MOGS	673.882	604.333	743.43	0.298408	1.31744e-06	1.24115e-05
		ENSG00000135926	protein_coding	TMBIM1	736.181	660.245	812.117	0.298278	1.50605e-07	1.73474e-06
		ENSG00000143294	protein_coding	PRCC	847.568	760.193	934.942	0.298158	9.05728e-08	1.08404e-06
		ENSG00000234337	processed_pseudogene	AC026462.1	223.905	200.755	247.055	0.29806	0.00239424	0.00999728
		ENSG00000198952	protein_coding	SMG5	2722.89	2442.57	3003.21	0.297993	2.19537e-17	8.40226e-16
		ENSG00000180667	protein_coding	YOD1	1703	1527.7	1878.29	0.297883	2.02887e-10	3.66196e-09
		ENSG00000114026	protein_coding	OGG1	174.237	156.21	192.264	0.297878	0.00681098	0.0242693
		ENSG00000138381	protein_coding	ASNSD1	318.589	285.762	351.417	0.297431	0.000249872	0.00138644
		ENSG00000236144	lncRNA	TMEM147-AS1	336.288	301.65	370.926	0.297366	0.000326275	0.00175823
		ENSG00000127124	protein_coding	HIVEP3	360.508	323.387	397.629	0.297333	0.000214182	0.00121116
		ENSG00000257267	transcribed_unitary_pseudogene	ZNF271P	529.492	475.05	583.933	0.297158	2.54131e-06	2.23554e-05
		ENSG00000144867	protein_coding	SRPRB	726.377	651.736	801.018	0.297134	6.57711e-08	8.07867e-07
		ENSG00000181915	protein_coding	ADO	564.271	506.275	622.267	0.297083	3.04798e-06	2.63732e-05
		ENSG00000076604	protein_coding	TRAF4	742.547	666.262	818.831	0.297073	9.1955e-08	1.09792e-06
		ENSG00000182446	protein_coding	NPLOC4	2468.44	2215.12	2721.76	0.297035	4.33607e-14	1.22722e-12
		ENSG00000163961	protein_coding	RNF168	1412.82	1267.86	1557.79	0.296903	9.3755e-12	2.02935e-10
		ENSG00000198612	protein_coding	COPS8	396.012	355.316	436.709	0.296816	3.97042e-05	0.000269604
		ENSG00000162408	protein_coding	NOL9	1425.44	1279.53	1571.35	0.296186	7.97742e-10	1.32878e-08
		ENSG00000198517	protein_coding	MAFK	796.148	714.634	877.661	0.296085	6.3009e-08	7.76773e-07
		ENSG00000169032	protein_coding	MAP2K1	897.311	805.536	989.087	0.295818	1.20265e-08	1.66551e-07
		ENSG00000109775	protein_coding	UFSP2	326.771	293.286	360.256	0.295804	0.00026544	0.00146462
		ENSG00000067248	protein_coding	DHX29	1660.06	1490.42	1829.71	0.295716	1.72674e-13	4.61561e-12
		ENSG00000125651	protein_coding	GTF2F1	1343.4	1206.16	1480.64	0.295572	3.45379e-11	6.9158e-10
		ENSG00000108852	protein_coding	MPP2	190.952	171.366	210.538	0.29544	0.0027764	0.0113043
		ENSG00000182154	protein_coding	MRPL41	204.986	183.986	225.986	0.295187	0.0028586	0.0116025
		ENSG00000141965	protein_coding	FEM1A	1060.5	952.326	1168.66	0.295054	2.30246e-08	3.04105e-07
		ENSG00000145868	protein_coding	FBXO38	790.744	710.161	871.328	0.294694	3.97464e-08	5.04774e-07
		ENSG00000164615	protein_coding	CAMLG	259.639	233.119	286.16	0.29461	0.00108951	0.00509646
		ENSG00000109065	protein_coding	NAT9	639.265	574.119	704.412	0.294604	4.75607e-06	3.92416e-05
		ENSG00000269292	lncRNA	AC093503.1	257.889	231.555	284.222	0.294513	0.0065016	0.0233448
		ENSG00000156398	protein_coding	SFXN2	205.376	184.398	226.354	0.294311	0.00330503	0.013108
		ENSG00000163636	protein_coding	PSMD6	1438.76	1292.43	1585.09	0.29427	2.86004e-11	5.82382e-10
		ENSG00000115042	protein_coding	FAHD2A	145.668	130.776	160.559	0.293972	0.00996978	0.0336186
		ENSG00000145414	protein_coding	NAF1	683.175	613.755	752.596	0.293779	3.43015e-07	3.6722e-06
		ENSG00000117543	protein_coding	DPH5	364.749	327.645	401.854	0.293727	0.000192983	0.00110426
		ENSG00000148843	protein_coding	PDCD11	5651.29	5078.12	6224.45	0.293599	1.73689e-19	8.01349e-18
		ENSG00000147383	protein_coding	NSDHL	373.133	335.208	411.058	0.293492	7.05123e-05	0.000448593
		ENSG00000154814	protein_coding	OXNAD1	409.331	367.766	450.896	0.293284	4.77917e-05	0.00031723
		ENSG00000175216	protein_coding	CKAP5	5269.73	4735.86	5803.6	0.293264	3.30708e-16	1.15542e-14
		ENSG00000134086	protein_coding	VHL	677.251	608.65	745.853	0.292845	4.53283e-07	4.72065e-06
		ENSG00000101017	protein_coding	CD40	153.077	137.511	168.643	0.292502	0.0077134	0.0269657
		ENSG00000132541	protein_coding	RIDA	258.614	232.4	284.829	0.292348	0.00213189	0.00903851
		ENSG00000065970	protein_coding	FOXJ2	758.042	681.404	834.679	0.292323	2.73202e-07	2.98361e-06
		ENSG00000131470	protein_coding	PSMC3IP	818.949	736.221	901.676	0.292112	4.31996e-07	4.52977e-06
		ENSG00000136478	protein_coding	TEX2	1251.57	1125.25	1377.89	0.29198	3.10152e-10	5.44625e-09
		ENSG00000114770	protein_coding	ABCC5	651.476	585.676	717.276	0.291975	1.26973e-06	1.1999e-05
		ENSG00000165632	protein_coding	TAF3	1098.17	987.339	1209.01	0.29194	4.81398e-09	7.18046e-08
		ENSG00000164975	protein_coding	SNAPC3	824.257	741.047	907.468	0.291925	4.39074e-08	5.54273e-07
		ENSG00000238045	lncRNA	AC009133.1	190.547	171.234	209.86	0.291919	0.0058875	0.0215066
		ENSG00000259956	protein_coding	RBM15B	866.701	779.245	954.158	0.291813	2.92355e-07	3.17835e-06
		ENSG00000103353	protein_coding	UBFD1	883.398	794.259	972.537	0.291812	2.78291e-07	3.03524e-06
		ENSG00000172831	protein_coding	CES2	462.283	415.601	508.965	0.291734	1.90865e-05	0.000138781
		ENSG00000275052	protein_coding	PPP4R3B	2445.98	2199.6	2692.35	0.291506	2.16984e-14	6.37699e-13
		ENSG00000182810	protein_coding	DDX28	157.438	141.486	173.39	0.291496	0.00758713	0.026585
		ENSG00000105220	protein_coding	GPI	3073.83	2764.29	3383.38	0.291458	9.73423e-14	2.6525e-12
		ENSG00000160214	protein_coding	RRP1	740.883	666.239	815.528	0.291298	6.0117e-07	6.09862e-06
		ENSG00000104976	protein_coding	SNAPC2	176.536	158.674	194.397	0.291276	0.00736056	0.0259097
		ENSG00000184967	protein_coding	NOC4L	232.761	209.3	256.223	0.290576	0.00264036	0.0108501
		ENSG00000127837	protein_coding	AAMP	665.103	598.254	731.952	0.290553	4.99399e-07	5.14681e-06
		ENSG00000119326	protein_coding	CTNNAL1	2429.12	2185.33	2672.91	0.290442	1.85749e-12	4.39329e-11
		ENSG00000135002	protein_coding	RFK	765.031	688.183	841.879	0.290439	3.32683e-07	3.57295e-06
		ENSG00000105058	protein_coding	FAM32A	880.526	792.226	968.826	0.289995	2.74247e-08	3.58844e-07
		ENSG00000154518	protein_coding	ATP5MC3	763.901	687.376	840.426	0.289639	4.16179e-07	4.38302e-06
		ENSG00000171951	protein_coding	SCG2	406.595	365.842	447.349	0.289464	0.000194734	0.00111239
		ENSG00000105464	protein_coding	GRIN2D	314.244	282.727	345.76	0.289431	0.000249453	0.00138594
		ENSG00000135297	protein_coding	MTO1	693.903	624.465	763.34	0.289285	5.97734e-07	6.0784e-06
		ENSG00000007968	protein_coding	E2F2	305.075	274.496	335.654	0.289233	0.0023735	0.00992544
		ENSG00000176058	protein_coding	TPRN	200.543	180.408	220.678	0.28923	0.00420718	0.0160984
		ENSG00000161981	protein_coding	SNRNP25	171.348	154.135	188.561	0.289139	0.00638494	0.0229896
		ENSG00000086289	protein_coding	EPDR1	252.633	227.314	277.952	0.289002	0.000954726	0.00454315
		ENSG00000197894	protein_coding	ADH5	1539.22	1385.7	1692.74	0.288556	5.25422e-12	1.16269e-10
		ENSG00000100216	protein_coding	TOMM22	1319.21	1187.68	1450.74	0.28843	1.97266e-09	3.08732e-08
		ENSG00000280206	lncRNA	AC026401.3	217.577	195.806	239.348	0.288352	0.00237641	0.00993515
		ENSG00000167565	protein_coding	SERTAD3	193.978	174.559	213.397	0.288325	0.00733242	0.025843
		ENSG00000155324	protein_coding	GRAMD2B	321.615	289.497	353.734	0.288215	0.000894724	0.00429386
		ENSG00000132467	protein_coding	UTP3	1115.8	1004.62	1226.98	0.288205	7.60099e-07	7.51619e-06
		ENSG00000163909	protein_coding	HEYL	210.093	189.09	231.096	0.288043	0.0045837	0.0173148
		ENSG00000116809	protein_coding	ZBTB17	356.79	321.208	392.371	0.287898	0.000375763	0.00199806
		ENSG00000102858	protein_coding	MGRN1	779.231	701.645	856.817	0.287874	1.00772e-06	9.74565e-06
		ENSG00000168763	protein_coding	CNNM3	400.709	360.769	440.648	0.287828	4.35627e-05	0.000292153
		ENSG00000149923	protein_coding	PPP4C	826.362	744.11	908.615	0.287804	4.27695e-08	5.4072e-07
		ENSG00000169100	protein_coding	SLC25A6	1405.26	1265.53	1544.98	0.28764	5.37397e-10	9.13195e-09
		ENSG00000100104	protein_coding	SRRD	718.194	646.819	789.569	0.287301	1.39197e-06	1.30299e-05
		ENSG00000278845	protein_coding	MRPL45	976.647	879.661	1073.63	0.287186	1.04064e-08	1.45914e-07
		ENSG00000025039	protein_coding	RRAGD	333.217	300.1	366.334	0.28685	0.00045944	0.00237914
		ENSG00000077235	protein_coding	GTF3C1	3564.54	3211.3	3917.78	0.286798	2.24914e-14	6.5642e-13
		ENSG00000100764	protein_coding	PSMC1	1422.36	1281.35	1563.36	0.286778	3.69009e-10	6.41292e-09
		ENSG00000107371	protein_coding	EXOSC3	357.889	322.341	393.438	0.286742	0.000173852	0.00100469
		ENSG00000185730	protein_coding	ZNF696	351.337	316.439	386.235	0.286731	0.000201756	0.00114821
		ENSG00000173258	protein_coding	ZNF483	637.731	574.492	700.97	0.286613	8.01879e-07	7.91075e-06
		ENSG00000113312	protein_coding	TTC1	1482.09	1335.36	1628.83	0.286405	4.92505e-10	8.4458e-09
		ENSG00000143845	protein_coding	ETNK2	160.98	144.966	176.994	0.286197	0.0107917	0.0358657
		ENSG00000106346	protein_coding	USP42	720.217	648.925	791.508	0.286154	2.00968e-06	1.8127e-05
		ENSG00000004779	protein_coding	NDUFAB1	498.5	449.144	547.856	0.28604	2.12362e-05	0.000152763
		ENSG00000100601	protein_coding	ALKBH1	280.302	252.508	308.096	0.286025	0.000586939	0.00295223
		ENSG00000158526	protein_coding	TSR2	856.492	771.834	941.149	0.285798	6.87947e-08	8.42547e-07
		ENSG00000198720	protein_coding	ANKRD13B	286.69	258.298	315.082	0.285691	0.000647549	0.00321768
		ENSG00000142751	protein_coding	GPN2	371.383	334.639	408.126	0.285634	0.000444575	0.00231069
		ENSG00000172939	protein_coding	OXSR1	1778.93	1603.36	1954.49	0.285531	8.89735e-11	1.69301e-09
		ENSG00000196498	protein_coding	NCOR2	1394.16	1256.61	1531.72	0.285409	1.7177e-07	1.95183e-06
		ENSG00000139168	protein_coding	ZCRB1	825.286	743.843	906.728	0.285324	3.76258e-07	3.99568e-06
		ENSG00000166526	protein_coding	ZNF3	681.917	614.657	749.177	0.285103	5.30602e-07	5.44837e-06
		ENSG00000198783	protein_coding	ZNF830	361.181	325.513	396.849	0.28508	0.000156061	0.00091094
		ENSG00000179455	protein_coding	MKRN3	142.401	128.287	156.515	0.284914	0.015141	0.047561
		ENSG00000048471	protein_coding	SNX29	224.234	202.075	246.394	0.284797	0.00206524	0.00879361
		ENSG00000116521	protein_coding	SCAMP3	454.412	409.62	499.204	0.284713	2.9045e-05	0.000203799
		ENSG00000091947	protein_coding	TMEM101	322.466	290.658	354.274	0.284654	0.000594975	0.0029864
		ENSG00000166170	protein_coding	BAG5	1150.34	1037.13	1263.54	0.284622	1.89914e-08	2.5524e-07
		ENSG00000175105	protein_coding	ZNF654	818.589	738.014	899.164	0.284586	2.04263e-07	2.278e-06
		ENSG00000100056	protein_coding	ESS2	237.525	214.085	260.966	0.284475	0.00209968	0.00891769
		ENSG00000112079	protein_coding	STK38	636.276	573.688	698.864	0.284296	9.4459e-07	9.17882e-06
		ENSG00000175137	protein_coding	SH3BP5L	589.611	531.65	647.572	0.28408	1.07864e-05	8.26026e-05
		ENSG00000072401	protein_coding	UBE2D1	475.835	429.079	522.592	0.28384	9.2705e-05	0.00057248
		ENSG00000185127	protein_coding	C6orf120	298.164	268.845	327.482	0.283686	0.000721786	0.00354576
		ENSG00000173915	protein_coding	ATP5MD	816.777	736.658	896.896	0.283597	2.56875e-06	2.25771e-05
		ENSG00000130741	protein_coding	EIF2S3	4085.55	3685.28	4485.83	0.28353	8.5516e-16	2.89511e-14
		ENSG00000282826	transcribed_unprocessed_pseudogene	FRG1CP	342.725	309.072	376.379	0.283408	0.000581494	0.00292921
		ENSG00000175756	protein_coding	AURKAIP1	419.977	378.777	461.177	0.283293	4.25303e-05	0.000286532
		ENSG00000143149	protein_coding	ALDH9A1	605.027	545.719	664.335	0.283281	4.87675e-06	4.01587e-05
		ENSG00000168785	protein_coding	TSPAN5	1549.1	1397.49	1700.71	0.283111	1.3067e-10	2.42611e-09
		ENSG00000107897	protein_coding	ACBD5	562.863	507.715	618.011	0.283108	5.48266e-06	4.46461e-05
		ENSG00000178741	protein_coding	COX5A	400.761	361.476	440.046	0.283044	8.41137e-05	0.000525593
		ENSG00000188735	protein_coding	TMEM120B	383.423	345.852	420.995	0.282907	0.000403157	0.0021238
		ENSG00000082213	protein_coding	C5orf22	778.968	702.78	855.155	0.282747	8.27738e-07	8.13725e-06
		ENSG00000196636	protein_coding	SDHAF3	183.71	165.673	201.747	0.282658	0.00633306	0.0228419
		ENSG00000101624	protein_coding	CEP76	263.134	237.343	288.926	0.282646	0.00212289	0.00900262
		ENSG00000108100	protein_coding	CCNY	900.679	812.647	988.711	0.282603	7.08999e-08	8.65734e-07
		ENSG00000196943	protein_coding	NOP9	1022.46	922.663	1122.26	0.282257	9.90063e-09	1.39637e-07
		ENSG00000005882	protein_coding	PDK2	200.837	181.198	220.475	0.281642	0.00596548	0.0217351
		ENSG00000115310	protein_coding	RTN4	3452.7	3116.69	3788.7	0.281606	2.65489e-17	1.0115e-15
		ENSG00000170689	protein_coding	HOXB9	276.19	249.225	303.155	0.281576	0.000923197	0.00441039
		ENSG00000002549	protein_coding	LAP3	636.764	574.735	698.793	0.281524	4.18956e-06	3.50135e-05
		ENSG00000100075	protein_coding	SLC25A1	524.428	473.333	575.522	0.281475	2.2256e-05	0.000159554
		ENSG00000174672	protein_coding	BRSK2	261.061	235.586	286.536	0.28138	0.00141638	0.00639117
		ENSG00000100142	protein_coding	POLR2F	264.36	238.569	290.151	0.281325	0.00155313	0.00690829
		ENSG00000171425	protein_coding	ZNF581	172.684	155.806	189.563	0.281292	0.00804903	0.0280111
		ENSG00000103363	protein_coding	ELOB	463.081	418.03	508.132	0.280986	4.09718e-05	0.000277317
		ENSG00000068697	protein_coding	LAPTM4A	729.305	658.416	800.193	0.280961	1.00197e-06	9.69727e-06
		ENSG00000129559	protein_coding	NEDD8	189.886	171.357	208.415	0.280961	0.00657483	0.0235575
		ENSG00000105401	protein_coding	CDC37	2508.31	2264.78	2751.84	0.280909	3.88075e-12	8.74857e-11
		ENSG00000151465	protein_coding	CDC123	1748.24	1578.62	1917.87	0.280681	1.11751e-11	2.39426e-10
		ENSG00000132603	protein_coding	NIP7	1008.42	910.557	1106.28	0.280616	1.06709e-08	1.49374e-07
		ENSG00000133773	protein_coding	CCDC59	1077.86	973.295	1182.43	0.280542	2.16807e-08	2.87709e-07
		ENSG00000106367	protein_coding	AP1S1	645.02	582.42	707.62	0.280478	3.17896e-06	2.73829e-05
		ENSG00000143486	protein_coding	EIF2D	580.237	523.931	636.543	0.280394	6.45819e-06	5.18132e-05
		ENSG00000101882	protein_coding	NKAP	733.805	662.623	804.987	0.280393	1.00503e-05	7.73172e-05
		ENSG00000198721	protein_coding	ECI2	535.539	483.6	587.479	0.280197	8.28891e-05	0.000518712
		ENSG00000135148	protein_coding	TRAFD1	439.787	397.185	482.389	0.279745	0.000101574	0.000621774
		ENSG00000145990	protein_coding	GFOD1	254.195	229.534	278.855	0.279701	0.00208047	0.00884948
		ENSG00000188428	protein_coding	BLOC1S5	261.085	235.76	286.41	0.279685	0.00161009	0.00712026
		ENSG00000136802	protein_coding	LRRC8A	574.542	518.929	630.156	0.279681	1.62231e-05	0.000119929
		ENSG00000144043	protein_coding	TEX261	574.493	518.892	630.093	0.279642	3.43982e-05	0.000237989
		ENSG00000082516	protein_coding	GEMIN5	1716.26	1550.41	1882.11	0.279538	1.74141e-10	3.18407e-09
		ENSG00000181135	protein_coding	ZNF707	207.339	187.22	227.458	0.279511	0.0050347	0.0187493
		ENSG00000111696	protein_coding	NT5DC3	859.824	776.809	942.84	0.279127	3.60557e-07	3.84777e-06
		ENSG00000176946	protein_coding	THAP4	543.963	491.412	596.514	0.279109	1.13166e-05	8.63095e-05
		ENSG00000158805	protein_coding	ZNF276	797.21	720.263	874.157	0.279016	9.33075e-07	9.08265e-06
		ENSG00000101224	protein_coding	CDC25B	1902.52	1719.06	2085.97	0.278946	2.37257e-11	4.8784e-10
		ENSG00000178053	protein_coding	MLF1	638.461	576.857	700.064	0.278834	2.62166e-06	2.29822e-05
		ENSG00000165689	protein_coding	ENTR1	1240.7	1121.15	1360.25	0.278677	2.01175e-09	3.14266e-08
		ENSG00000204370	protein_coding	SDHD	515.777	466.042	565.513	0.278558	5.80752e-05	0.000378039
		ENSG00000150764	protein_coding	DIXDC1	306.25	276.68	335.82	0.278552	0.000620726	0.00309811
		ENSG00000174177	protein_coding	CTU2	437.762	395.541	479.984	0.27852	7.48159e-05	0.000473824
		ENSG00000022840	protein_coding	RNF10	1308.13	1182.17	1434.1	0.278487	2.41439e-10	4.30702e-09
		ENSG00000214050	protein_coding	FBXO16	145.951	131.812	160.09	0.278481	0.0159654	0.0495498
		ENSG00000187049	protein_coding	TMEM216	158.803	143.427	174.178	0.278477	0.0121965	0.0395892
		ENSG00000141429	protein_coding	GALNT1	1422.01	1285.12	1558.91	0.278438	5.26737e-10	8.97798e-09
		ENSG00000100347	protein_coding	SAMM50	644.494	582.409	706.578	0.278383	3.9995e-06	3.35751e-05
		ENSG00000124562	protein_coding	SNRPC	976.817	882.782	1070.85	0.278345	1.3385e-08	1.84303e-07
		ENSG00000164347	protein_coding	GFM2	759.69	686.571	832.808	0.278207	6.26189e-07	6.31439e-06
		ENSG00000114023	protein_coding	FAM162A	350.557	316.766	384.347	0.278195	0.000653088	0.00323757
		ENSG00000269343	protein_coding	ZNF587B	604.717	546.502	662.931	0.278169	7.21715e-06	5.73017e-05
		ENSG00000214517	protein_coding	PPME1	1018.18	920.23	1116.13	0.27816	2.29354e-08	3.03403e-07
		ENSG00000178057	protein_coding	NDUFAF3	215.586	194.776	236.395	0.278084	0.00377048	0.0146741
		ENSG00000224597	transcribed_unprocessed_pseudogene	SVIL-AS1	345.816	312.494	379.137	0.27808	0.000311358	0.00168757
		ENSG00000092208	protein_coding	GEMIN2	273.246	246.898	299.594	0.278072	0.00125036	0.00572796
		ENSG00000075415	protein_coding	SLC25A3	3764.28	3402.63	4125.93	0.277995	6.46417e-15	2.00104e-13
		ENSG00000144791	protein_coding	LIMD1	1033.28	933.967	1132.59	0.277914	1.12907e-08	1.57137e-07
		ENSG00000060069	protein_coding	CTDP1	609.103	550.557	667.649	0.277739	1.854e-05	0.000135288
		ENSG00000197622	protein_coding	CDC42SE1	1241.76	1122.71	1360.8	0.277241	6.22935e-09	9.12193e-08
		ENSG00000107862	protein_coding	GBF1	2320.17	2097.9	2542.44	0.277153	1.60435e-12	3.83223e-11
		ENSG00000155621	protein_coding	C9orf85	188.629	170.477	206.782	0.277059	0.00605389	0.0219904
		ENSG00000171219	protein_coding	CDC42BPG	453.924	410.379	497.469	0.277033	0.000104163	0.000634398
		ENSG00000087111	protein_coding	PIGS	380.853	344.316	417.389	0.276927	0.000143104	0.00084261
		ENSG00000138029	protein_coding	HADHB	692.254	625.926	758.581	0.276908	2.13262e-06	1.91028e-05
		ENSG00000132432	protein_coding	SEC61G	524.877	474.59	575.163	0.276759	0.000418103	0.00219
		ENSG00000118495	protein_coding	PLAGL1	607.037	548.919	665.155	0.27664	4.10355e-06	3.43288e-05
		ENSG00000255302	protein_coding	EID1	973.812	880.648	1066.98	0.276607	1.9714e-06	1.7839e-05
		ENSG00000171161	protein_coding	ZNF672	236.561	213.867	259.255	0.276484	0.00311611	0.0124526
		ENSG00000165804	protein_coding	ZNF219	179.805	162.546	197.063	0.27626	0.00931994	0.0317002
		ENSG00000125445	protein_coding	MRPS7	677.957	613.208	742.705	0.276003	3.2202e-06	2.76957e-05
		ENSG00000160959	protein_coding	LRRC14	595.611	538.722	652.5	0.275972	6.26139e-06	5.04265e-05
		ENSG00000149357	protein_coding	LAMTOR1	317.481	287.119	347.843	0.275913	0.000447602	0.00232427
		ENSG00000144580	protein_coding	CNOT9	1309.94	1184.96	1434.91	0.275908	9.57403e-10	1.57294e-08
		ENSG00000196639	protein_coding	HRH1	313.18	283.233	343.127	0.275868	0.000704403	0.00346745
		ENSG00000187051	protein_coding	RPS19BP1	402.763	364.281	441.245	0.275839	0.000133509	0.000792489
		ENSG00000110107	protein_coding	PRPF19	1469.28	1329.23	1609.34	0.275683	1.87498e-08	2.52194e-07
		ENSG00000188807	protein_coding	TMEM201	487.042	440.567	533.517	0.275604	0.000275321	0.00151121
		ENSG00000168564	protein_coding	CDKN2AIP	255.926	231.464	280.387	0.27555	0.00165267	0.00727987
		ENSG00000138614	protein_coding	INTS14	764.994	692.067	837.92	0.275538	3.80368e-07	4.03362e-06
		ENSG00000156463	protein_coding	SH3RF2	416.043	376.372	455.714	0.275306	0.0013196	0.00599299
		ENSG00000147324	protein_coding	MFHAS1	891.436	806.555	976.318	0.275268	1.61166e-07	1.84003e-06
		ENSG00000153786	protein_coding	ZDHHC7	970.802	878.42	1063.18	0.275122	5.82068e-08	7.23397e-07
		ENSG00000108406	protein_coding	DHX40	1366.75	1236.79	1496.71	0.274997	1.64701e-08	2.23973e-07
		ENSG00000064102	protein_coding	INTS13	882.373	798.438	966.308	0.274989	1.11282e-06	1.06355e-05
		ENSG00000073111	protein_coding	MCM2	2153.25	1948.57	2357.92	0.27497	1.18989e-08	1.65055e-07
		ENSG00000144659	protein_coding	SLC25A38	504.489	456.53	552.448	0.274583	2.14802e-05	0.000154254
		ENSG00000103415	protein_coding	HMOX2	594.899	538.384	651.414	0.274475	1.52836e-05	0.000113732
		ENSG00000204560	protein_coding	DHX16	830.307	751.469	909.146	0.274466	7.76513e-07	7.66949e-06
		ENSG00000100241	protein_coding	SBF1	1334.79	1208.19	1461.39	0.274278	9.39766e-10	1.54698e-08
		ENSG00000160867	protein_coding	FGFR4	500.968	453.416	548.521	0.274162	2.55388e-05	0.000180855
		ENSG00000143774	protein_coding	GUK1	528.299	478.222	578.377	0.273807	2.37743e-05	0.000169285
		ENSG00000163171	protein_coding	CDC42EP3	659.291	596.827	721.754	0.273778	3.0492e-06	2.63732e-05
		ENSG00000169991	protein_coding	IFFO2	562.737	509.413	616.061	0.273748	1.81596e-05	0.00013296
		ENSG00000104695	protein_coding	PPP2CB	1309.25	1185.37	1433.14	0.273625	1.52367e-08	2.08268e-07
		ENSG00000100380	protein_coding	ST13	3219.59	2915.09	3524.09	0.273621	8.55803e-11	1.63584e-09
		ENSG00000188636	protein_coding	RTL6	806.057	729.823	882.291	0.273366	4.4275e-07	4.63388e-06
		ENSG00000197037	protein_coding	ZSCAN25	254.725	230.578	278.871	0.273267	0.0033229	0.0131727
		ENSG00000131043	protein_coding	AAR2	467.391	423.187	511.595	0.273119	5.77004e-05	0.000375744
		ENSG00000100554	protein_coding	ATP6V1D	721.828	653.615	790.04	0.273104	8.28149e-06	6.48955e-05
		ENSG00000062485	protein_coding	CS	1771.52	1604.28	1938.75	0.273048	9.01072e-11	1.71265e-09
		ENSG00000172922	protein_coding	RNASEH2C	457.662	414.405	500.918	0.272934	5.07086e-05	0.000334613
		ENSG00000163348	protein_coding	PYGO2	335.638	303.916	367.361	0.272709	0.000483749	0.00248895
		ENSG00000136699	protein_coding	SMPD4	1094.37	991.155	1197.58	0.272691	3.63886e-07	3.87348e-06
		ENSG00000132740	protein_coding	IGHMBP2	414.208	375.087	453.33	0.272675	0.000219857	0.00123909
		ENSG00000157895	protein_coding	C12orf43	389.983	353.152	426.814	0.272616	0.000162911	0.000947313
		ENSG00000162129	protein_coding	CLPB	853.687	773.19	934.184	0.272562	3.02712e-07	3.28035e-06
		ENSG00000186866	protein_coding	POFUT2	307.172	278.148	336.197	0.272559	0.000678557	0.003351
		ENSG00000188312	protein_coding	CENPP	155.535	140.793	170.276	0.272538	0.0126481	0.0408112
		ENSG00000145022	protein_coding	TCTA	215.159	194.809	235.51	0.272457	0.00572507	0.021009
		ENSG00000149657	protein_coding	LSM14B	488.584	442.496	534.671	0.272423	6.51141e-05	0.000419641
		ENSG00000106484	protein_coding	MEST	704.179	637.836	770.522	0.272261	1.47398e-06	1.37062e-05
		ENSG00000146576	protein_coding	C7orf26	199.939	181.061	218.816	0.271872	0.00587123	0.0214565
		ENSG00000137074	protein_coding	APTX	620.791	562.411	679.171	0.271709	3.05291e-05	0.000212794
		ENSG00000166199	protein_coding	ALKBH3	320.749	290.564	350.933	0.271489	0.000636722	0.00316856
		ENSG00000064012	protein_coding	CASP8	1014.27	919.047	1109.48	0.27141	1.66923e-06	1.53239e-05
		ENSG00000112339	protein_coding	HBS1L	2246.42	2035.74	2457.1	0.271281	8.40138e-13	2.0898e-11
		ENSG00000177954	protein_coding	RPS27	390.107	353.461	426.753	0.271151	0.00258305	0.0106614
		ENSG00000110104	protein_coding	CCDC86	1194.89	1082.86	1306.92	0.271099	4.74924e-07	4.92168e-06
		ENSG00000041988	protein_coding	THAP3	245.137	222.088	268.185	0.270986	0.00269767	0.0110452
		ENSG00000158882	protein_coding	TOMM40L	185.017	167.599	202.435	0.270967	0.0101812	0.0342493
		ENSG00000178184	protein_coding	PARD6G	291.56	264.176	318.945	0.270874	0.00137729	0.00622478
		ENSG00000151332	protein_coding	MBIP	693.21	628.281	758.14	0.270661	3.53277e-06	3.00312e-05
		ENSG00000145780	protein_coding	FEM1C	1087.98	986.157	1189.8	0.270585	2.18456e-08	2.89441e-07
		ENSG00000171109	protein_coding	MFN1	1362.37	1234.92	1489.82	0.270522	3.09777e-09	4.72951e-08
		ENSG00000104825	protein_coding	NFKBIB	544.008	493.062	594.953	0.270506	1.82174e-05	0.000133267
		ENSG00000042753	protein_coding	AP2S1	490.45	444.547	536.352	0.270289	3.9489e-05	0.000268468
		ENSG00000167595	protein_coding	PROSER3	338.194	306.514	369.874	0.270277	0.000731004	0.0035806
		ENSG00000106399	protein_coding	RPA3	353.835	320.755	386.914	0.269773	0.000440249	0.00229175
		ENSG00000125875	protein_coding	TBC1D20	499.732	453.064	546.401	0.269701	0.000115627	0.000696656
		ENSG00000084072	protein_coding	PPIE	934.387	847.213	1021.56	0.269689	1.43498e-07	1.66082e-06
		ENSG00000066739	protein_coding	ATG2B	460.38	417.413	503.347	0.269491	0.000194639	0.00111222
		ENSG00000134001	protein_coding	EIF2S1	3011.72	2731.25	3292.2	0.269403	4.43717e-12	9.91008e-11
		ENSG00000197785	protein_coding	ATAD3A	957.544	868.338	1046.75	0.269306	5.9995e-08	7.4288e-07
		ENSG00000139263	protein_coding	LRIG3	248.024	224.856	271.191	0.269216	0.00293658	0.0118647
		ENSG00000204673	protein_coding	AKT1S1	781.076	708.4	853.751	0.268903	4.60419e-05	0.000307311
		ENSG00000175970	protein_coding	UNC119B	649.68	589.257	710.103	0.268716	6.99836e-06	5.56695e-05
		ENSG00000059691	protein_coding	GATB	359.467	325.996	392.939	0.268699	0.000416643	0.00218439
		ENSG00000233276	polymorphic_pseudogene	GPX1	598.494	542.833	654.156	0.268675	2.2647e-05	0.000162081
		ENSG00000164070	protein_coding	HSPA4L	2448.16	2220.8	2675.52	0.268629	2.28512e-13	6.05054e-12
		ENSG00000144736	protein_coding	SHQ1	570.713	517.659	623.767	0.268532	9.64444e-06	7.45011e-05
		ENSG00000117419	protein_coding	ERI3	278.273	252.365	304.181	0.268446	0.00245386	0.0102057
		ENSG00000268858	lncRNA	AL118506.1	327.691	297.212	358.171	0.268334	0.00124961	0.0057261
		ENSG00000152291	protein_coding	TGOLN2	1899.09	1723.17	2075	0.267905	1.39886e-09	2.24136e-08
		ENSG00000116918	protein_coding	TSNAX	916.015	831.154	1000.87	0.26778	1.58479e-06	1.46155e-05
		ENSG00000017797	protein_coding	RALBP1	2198.21	1994.75	2401.67	0.267709	6.3857e-12	1.40569e-10
		ENSG00000113734	protein_coding	BNIP1	305.212	276.898	333.526	0.267567	0.00097868	0.0046373
		ENSG00000132326	protein_coding	PER2	801.14	726.975	875.305	0.267544	1.35958e-06	1.27764e-05
		ENSG00000113141	protein_coding	IK	1645.83	1493.7	1797.97	0.267316	1.44677e-07	1.67103e-06
		ENSG00000158941	protein_coding	CCAR2	2588.75	2349.64	2827.86	0.267167	4.11046e-10	7.09222e-09
		ENSG00000097007	protein_coding	ABL1	1179.51	1070.53	1288.5	0.267144	3.54412e-08	4.53173e-07
		ENSG00000103932	protein_coding	RPAP1	480.562	436.121	525.003	0.267039	6.10992e-05	0.000396344
		ENSG00000103549	protein_coding	RNF40	2218.07	2013.36	2422.78	0.266937	2.00155e-10	3.62431e-09
		ENSG00000133243	protein_coding	BTBD2	304.736	276.532	332.94	0.266936	0.00106206	0.00499584
		ENSG00000103248	protein_coding	MTHFSD	251.843	228.526	275.16	0.266846	0.00467836	0.0175935
		ENSG00000181991	protein_coding	MRPS11	527.927	479.151	576.702	0.266835	3.50517e-05	0.000241617
		ENSG00000086065	protein_coding	CHMP5	1604.94	1456.87	1753	0.266788	1.94144e-07	2.17379e-06
		ENSG00000175826	protein_coding	CTDNEP1	620.047	562.82	677.275	0.266635	7.43955e-06	5.87627e-05
		ENSG00000110048	protein_coding	OSBP	1971.11	1789.46	2152.76	0.266532	1.32553e-11	2.80778e-10
		ENSG00000126524	protein_coding	SBDS	1600.46	1452.95	1747.96	0.266521	2.86507e-08	3.7331e-07
		ENSG00000173334	protein_coding	TRIB1	4702.23	4269.2	5135.27	0.266419	6.97499e-08	8.52386e-07
		ENSG00000213281	protein_coding	NRAS	1771.97	1608.74	1935.2	0.2664	9.85378e-10	1.60948e-08
		ENSG00000186283	protein_coding	TOR3A	461.177	418.632	503.722	0.266366	7.00989e-05	0.000446301
		ENSG00000177380	protein_coding	PPFIA3	265.732	241.186	290.278	0.26628	0.00251996	0.0104317
		ENSG00000251095	lncRNA	AC093866.1	257.806	233.996	281.615	0.266202	0.00307937	0.0123347
		ENSG00000178188	protein_coding	SH2B1	547.925	497.428	598.422	0.266187	2.34043e-05	0.000167004
		ENSG00000140464	protein_coding	PML	256.822	233.112	280.531	0.266095	0.00291919	0.0118068
		ENSG00000213593	protein_coding	TMX2	681.83	619.038	744.622	0.266086	4.07918e-06	3.41418e-05
		ENSG00000198431	protein_coding	TXNRD1	7769.48	7055.58	8483.39	0.265842	3.85408e-11	7.67172e-10
		ENSG00000133216	protein_coding	EPHB2	214.555	194.754	234.356	0.265803	0.00628041	0.0226909
		ENSG00000146223	protein_coding	RPL7L1	2208.06	2005.15	2410.97	0.265784	1.0593e-11	2.27823e-10
		ENSG00000117408	protein_coding	IPO13	253.421	230.054	276.788	0.265757	0.00375595	0.0146271
		ENSG00000119718	protein_coding	EIF2B2	395.432	359.025	431.839	0.265731	0.000349407	0.00187032
		ENSG00000204520	protein_coding	MICA	611.249	555.045	667.453	0.265624	2.31075e-05	0.000165026
		ENSG00000233830	processed_pseudogene	EIF4HP1	432.509	392.714	472.303	0.265616	0.000323918	0.00174721
		ENSG00000128590	protein_coding	DNAJB9	339.777	308.534	371.021	0.265283	0.00195451	0.00841358
		ENSG00000198042	protein_coding	MAK16	2355.03	2139.04	2571.03	0.265265	2.28204e-12	5.30795e-11
		ENSG00000197728	protein_coding	RPS26	833.574	757.065	910.082	0.265259	3.5869e-06	3.04164e-05
		ENSG00000164221	protein_coding	CCDC112	647.293	587.897	706.689	0.2651	4.94575e-05	0.000327384
		ENSG00000116213	protein_coding	WRAP73	424.345	385.393	463.296	0.264978	0.000145916	0.000857669
		ENSG00000135823	protein_coding	STX6	712.065	646.776	777.354	0.264932	2.28702e-06	2.03864e-05
		ENSG00000183475	protein_coding	ASB7	474.06	430.59	517.529	0.264766	7.85673e-05	0.000494238
		ENSG00000129055	protein_coding	ANAPC13	368.823	334.985	402.661	0.264749	0.000382722	0.00202929
		ENSG00000130204	protein_coding	TOMM40	1420.4	1290.48	1550.32	0.264467	6.50322e-08	7.99375e-07
		ENSG00000257923	protein_coding	CUX1	1668.49	1516.13	1820.84	0.264052	2.59622e-09	4.00369e-08
		ENSG00000187678	protein_coding	SPRY4	1769	1607.54	1930.47	0.26395	3.48757e-09	5.27205e-08
		ENSG00000149499	protein_coding	EML3	361.586	328.524	394.648	0.263836	0.000724672	0.0035554
		ENSG00000036054	protein_coding	TBC1D23	611.594	555.752	667.436	0.263757	1.70704e-05	0.00012575
		ENSG00000104853	protein_coding	CLPTM1	926.979	842.389	1011.57	0.263751	2.47812e-07	2.72577e-06
		ENSG00000134294	protein_coding	SLC38A2	11490.1	10442.6	12537.5	0.263745	2.99339e-11	6.07333e-10
		ENSG00000106993	protein_coding	CDC37L1	613.909	557.875	669.942	0.263662	1.10024e-05	8.41038e-05
		ENSG00000101412	protein_coding	E2F1	280.396	254.771	306.021	0.263483	0.00175125	0.00765604
		ENSG00000065183	protein_coding	WDR3	3363.47	3057.12	3669.83	0.263461	5.95373e-13	1.51223e-11
		ENSG00000134440	protein_coding	NARS1	3222.59	2929.34	3515.84	0.263215	5.82467e-14	1.62936e-12
		ENSG00000137413	protein_coding	TAF8	510.833	464.278	557.388	0.263175	0.000223769	0.00125903
		ENSG00000132612	protein_coding	VPS4A	344.791	313.349	376.232	0.263085	0.000836326	0.00404008
		ENSG00000154803	protein_coding	FLCN	175.923	159.844	192.003	0.262965	0.0147024	0.0463563
		ENSG00000165678	protein_coding	GHITM	1494.57	1358.72	1630.41	0.262806	7.34891e-09	1.06319e-07
		ENSG00000159692	protein_coding	CTBP1	1260.53	1145.97	1375.09	0.26275	6.84623e-09	9.98186e-08
		ENSG00000138592	protein_coding	USP8	2993.87	2721.93	3265.81	0.262723	1.7946e-13	4.78182e-12
		ENSG00000127774	protein_coding	EMC6	395.816	359.793	431.839	0.26266	0.000479416	0.00247194
		ENSG00000178951	protein_coding	ZBTB7A	1664.4	1513.29	1815.51	0.262527	1.48328e-09	2.35869e-08
		ENSG00000278053	protein_coding	DDX52	2380.55	2164.5	2596.6	0.262477	4.89772e-12	1.08523e-10
		ENSG00000164338	protein_coding	UTP15	1836.61	1669.93	2003.28	0.262438	4.93234e-10	8.4497e-09
		ENSG00000143436	protein_coding	MRPL9	789.276	717.639	860.914	0.262276	3.28568e-06	2.81582e-05
		ENSG00000135931	protein_coding	ARMC9	287.997	261.81	314.184	0.262178	0.00178561	0.0077876
		ENSG00000141682	protein_coding	PMAIP1	1920.89	1746.91	2094.87	0.261921	3.24945e-07	3.4943e-06
		ENSG00000185088	protein_coding	RPS27L	899.408	817.947	980.868	0.261759	4.76486e-05	0.000316655
		ENSG00000018610	protein_coding	CXorf56	512.099	465.73	558.468	0.261468	0.000282356	0.0015448
		ENSG00000155275	protein_coding	TRMT44	325.279	295.799	354.76	0.261417	0.00196921	0.00845742
		ENSG00000138814	protein_coding	PPP3CA	2575.9	2343.08	2808.73	0.261409	2.15706e-10	3.86847e-09
		ENSG00000154529	protein_coding	CNTNAP3B	255.596	232.414	278.778	0.261391	0.00244327	0.0101692
		ENSG00000125877	protein_coding	ITPA	226.662	206.105	247.219	0.261248	0.00543384	0.0200539
		ENSG00000189043	protein_coding	NDUFA4	429.559	390.685	468.433	0.261225	0.000301512	0.00164001
		ENSG00000086544	protein_coding	ITPKC	284.54	258.77	310.309	0.261112	0.00363366	0.0142238
		ENSG00000128564	protein_coding	VGF	269.899	245.459	294.339	0.261024	0.00361187	0.0141583
		ENSG00000213588	protein_coding	ZBTB9	331.622	301.614	361.63	0.261019	0.00114286	0.00530919
		ENSG00000234616	protein_coding	JRK	477.949	434.766	521.133	0.260862	0.000133605	0.00079278
		ENSG00000104915	protein_coding	STX10	612.548	557.279	667.817	0.260626	1.68147e-05	0.000123975
		ENSG00000145293	protein_coding	ENOPH1	1022.06	929.927	1114.2	0.260559	1.87081e-07	2.10451e-06
		ENSG00000116717	protein_coding	GADD45A	377.216	343.162	411.269	0.260496	0.00248758	0.0103147
		ENSG00000162616	protein_coding	DNAJB4	1472.63	1340.01	1605.25	0.260372	7.67684e-08	9.31398e-07
		ENSG00000136261	protein_coding	BZW2	1358.24	1236.05	1480.43	0.260086	1.41465e-08	1.9368e-07
		ENSG00000010539	protein_coding	ZNF200	271.268	246.802	295.734	0.259983	0.00414246	0.0159049
		ENSG00000173039	protein_coding	RELA	806.559	734.077	879.041	0.259675	3.85368e-06	3.23994e-05
		ENSG00000106244	protein_coding	PDAP1	2132.22	1940.81	2323.62	0.259596	5.28718e-11	1.03651e-09
		ENSG00000130513	protein_coding	GDF15	543.364	494.529	592.198	0.259544	0.000562228	0.00284578
		ENSG00000132952	protein_coding	USPL1	838.186	762.926	913.446	0.259466	1.21464e-06	1.15211e-05
		ENSG00000140553	protein_coding	UNC45A	1140.04	1037.75	1242.32	0.259342	8.64877e-08	1.04107e-06
		ENSG00000137574	protein_coding	TGS1	1394.69	1269.77	1519.61	0.258948	1.86838e-08	2.51507e-07
		ENSG00000167778	protein_coding	SPRYD3	1092.74	994.848	1190.62	0.258933	2.69938e-07	2.95091e-06
		ENSG00000125266	protein_coding	EFNB2	1274.13	1160.06	1388.19	0.258802	2.41752e-07	2.6626e-06
		ENSG00000168610	protein_coding	STAT3	1433.14	1304.88	1561.41	0.258754	7.0945e-08	8.65734e-07
		ENSG00000174775	protein_coding	HRAS	497.28	452.719	541.841	0.258732	0.00010415	0.000634398
		ENSG00000164172	protein_coding	MOCS2	745.852	679.069	812.635	0.2587	1.05144e-05	8.06294e-05
		ENSG00000174306	protein_coding	ZHX3	305.068	277.725	332.412	0.258462	0.00308933	0.0123602
		ENSG00000151779	protein_coding	NBAS	949.998	865.071	1034.92	0.258361	7.34506e-07	7.30563e-06
		ENSG00000175634	protein_coding	RPS6KB2	437.214	398.082	476.346	0.25835	0.00028927	0.00157852
		ENSG00000100395	protein_coding	L3MBTL2	682.15	621.153	743.147	0.258319	1.18883e-05	9.01795e-05
		ENSG00000197258	processed_pseudogene	EIF4BP6	235.323	214.225	256.422	0.25829	0.00804032	0.0279866
		ENSG00000197933	protein_coding	ZNF823	208.429	189.74	227.117	0.258169	0.0073301	0.0258403
		ENSG00000011638	protein_coding	TMEM159	191.773	174.572	208.974	0.258152	0.0118467	0.0387074
		ENSG00000167264	protein_coding	DUS2	264.286	240.648	287.924	0.257783	0.00488452	0.0182874
		ENSG00000174977	processed_pseudogene	AC026271.1	293.328	267.103	319.553	0.257775	0.00415646	0.0159405
		ENSG00000160785	protein_coding	SLC25A44	537.986	489.977	585.995	0.257693	4.99372e-05	0.00033004
		ENSG00000119537	protein_coding	KDSR	385.054	350.671	419.436	0.257661	0.000446352	0.00231921
		ENSG00000110619	protein_coding	CARS1	803.356	731.723	874.99	0.257646	2.35387e-06	2.08189e-05
		ENSG00000161217	protein_coding	PCYT1A	828.641	754.791	902.491	0.257522	1.99789e-06	1.80496e-05
		ENSG00000185551	protein_coding	NR2F2	3411.57	3107.87	3715.26	0.257461	6.03039e-13	1.5294e-11
		ENSG00000164715	protein_coding	LMTK2	1311.35	1194.62	1428.08	0.257333	2.37917e-07	2.6255e-06
		ENSG00000183742	protein_coding	MACC1	732.625	667.372	797.879	0.257325	3.15424e-06	2.7184e-05
		ENSG00000146085	protein_coding	MMUT	355.415	323.744	387.087	0.257078	0.00128084	0.00585326
		ENSG00000161057	protein_coding	PSMC2	2163.22	1970.93	2355.52	0.257046	6.15155e-11	1.19621e-09
		ENSG00000085063	protein_coding	CD59	724.121	659.719	788.522	0.256943	9.39406e-06	7.2667e-05
		ENSG00000204843	protein_coding	DCTN1	2919.23	2659.88	3178.58	0.25693	1.551e-08	2.11585e-07
		ENSG00000152147	protein_coding	GEMIN6	315.518	287.448	343.588	0.256557	0.00174414	0.0076309
		ENSG00000138785	protein_coding	INTS12	473.474	431.409	515.538	0.256478	9.6164e-05	0.000591454
		ENSG00000164815	protein_coding	ORC5	580.355	528.872	631.839	0.256194	5.10657e-05	0.000336574
		ENSG00000169976	protein_coding	SF3B5	242.28	220.737	263.824	0.256188	0.00431949	0.0164645
		ENSG00000151576	protein_coding	QTRT2	1512.54	1378.59	1646.49	0.256031	3.02742e-09	4.62629e-08
		ENSG00000172172	protein_coding	MRPL13	711.629	648.577	774.681	0.255963	7.92638e-06	6.22576e-05
		ENSG00000226121	processed_pseudogene	AHCTF1P1	283.846	258.665	309.027	0.255742	0.00454171	0.0171755
		ENSG00000034713	protein_coding	GABARAPL2	536.988	489.471	584.505	0.255515	9.27525e-05	0.000572563
		ENSG00000101199	protein_coding	ARFGAP1	811.344	739.603	883.085	0.255484	3.49405e-06	2.97321e-05
		ENSG00000198874	protein_coding	TYW1	568.186	517.94	618.432	0.255378	2.88751e-05	0.000202861
		ENSG00000176248	protein_coding	ANAPC2	484.571	441.73	527.412	0.255236	0.000136539	0.000807629
		ENSG00000144231	protein_coding	POLR2D	974.295	888.282	1060.31	0.255132	2.2884e-05	0.000163619
		ENSG00000165490	protein_coding	DDIAS	721.097	657.446	784.749	0.255004	1.56214e-05	0.000115938
		ENSG00000104897	protein_coding	SF3A2	1139.52	1039.01	1240.03	0.254943	3.79701e-07	4.02909e-06
		ENSG00000185418	protein_coding	TARS3	353.823	322.577	385.07	0.254754	0.00113595	0.00528439
		ENSG00000127463	protein_coding	EMC1	2109.59	1923.87	2295.31	0.254562	1.79846e-11	3.76225e-10
		ENSG00000143793	protein_coding	C1orf35	280.804	256.014	305.595	0.254487	0.00224579	0.00945713
		ENSG00000205571	protein_coding	SMN2	197.321	179.877	214.764	0.254441	0.0100204	0.033769
		ENSG00000032389	protein_coding	EIPR1	456.801	416.592	497.01	0.254082	0.000382606	0.00202929
		ENSG00000121690	protein_coding	DEPDC7	351.645	320.68	382.611	0.254016	0.00144293	0.00649357
		ENSG00000107262	protein_coding	BAG1	833.213	759.991	906.434	0.253913	1.79508e-06	1.63666e-05
		ENSG00000180104	protein_coding	EXOC3	843.883	769.731	918.035	0.253893	1.97901e-06	1.78982e-05
		ENSG00000168894	protein_coding	RNF181	254.109	231.722	276.497	0.253865	0.00350153	0.0137771
		ENSG00000204599	protein_coding	TRIM39	179.547	163.704	195.39	0.253845	0.0143571	0.0455147
		ENSG00000163795	protein_coding	ZNF513	250.151	228.125	272.178	0.253711	0.00908801	0.0310367
		ENSG00000100297	protein_coding	MCM5	1684.41	1536.63	1832.19	0.253652	1.78679e-08	2.41296e-07
		ENSG00000100983	protein_coding	GSS	568.227	518.316	618.138	0.253647	0.000105134	0.000639382
		ENSG00000167112	protein_coding	TRUB2	555.055	506.322	603.788	0.253527	3.80567e-05	0.000259674
		ENSG00000078070	protein_coding	MCCC1	231.306	210.957	251.655	0.253396	0.00559402	0.0205774
		ENSG00000213790	processed_pseudogene	OLA1P1	235.132	214.448	255.815	0.253385	0.0151616	0.0475989
		ENSG00000105223	protein_coding	PLD3	301.134	274.682	327.587	0.253272	0.00323963	0.0128759
		ENSG00000102977	protein_coding	ACD	232.667	212.214	253.121	0.253211	0.00913924	0.0311801
		ENSG00000179981	protein_coding	TSHZ1	268.157	244.61	291.704	0.253071	0.00386394	0.014979
		ENSG00000186432	protein_coding	KPNA4	2091.3	1908.34	2274.25	0.25295	2.82956e-10	4.98429e-09
		ENSG00000104969	protein_coding	SGTA	1311.71	1196.95	1426.47	0.2529	1.55171e-08	2.11585e-07
		ENSG00000086827	protein_coding	ZW10	767.61	700.436	834.785	0.252819	4.65977e-06	3.85605e-05
		ENSG00000165861	protein_coding	ZFYVE1	216.022	197.069	234.974	0.252628	0.00921708	0.0313998
		ENSG00000166529	protein_coding	ZSCAN21	207.869	189.629	226.109	0.252617	0.0134421	0.0430106
		ENSG00000116903	protein_coding	EXOC8	435.78	397.692	473.867	0.252247	0.000799507	0.00388115
		ENSG00000108578	protein_coding	BLMH	1109.05	1012.27	1205.84	0.252214	1.02722e-07	1.21477e-06
		ENSG00000134153	protein_coding	EMC7	398.488	363.672	433.305	0.252108	0.000417915	0.0021897
		ENSG00000166333	protein_coding	ILK	948.583	865.872	1031.3	0.251965	6.16916e-06	4.98028e-05
		ENSG00000149100	protein_coding	EIF3M	2698.52	2463.42	2933.62	0.251924	1.09064e-11	2.33966e-10
		ENSG00000132646	protein_coding	PCNA	2830.69	2584.11	3077.27	0.251891	1.20235e-10	2.24474e-09
		ENSG00000118640	protein_coding	VAMP8	172.388	157.293	187.483	0.251834	0.0153286	0.0479268
		ENSG00000123146	protein_coding	ADGRE5	895.589	817.546	973.633	0.251795	2.03093e-06	1.82795e-05
		ENSG00000083845	protein_coding	RPS5	2241.72	2046.61	2436.84	0.251665	2.13347e-09	3.31742e-08
		ENSG00000086189	protein_coding	DIMT1	915.911	836.147	995.675	0.251642	7.41849e-07	7.36166e-06
		ENSG00000176903	protein_coding	PNMA1	348.058	317.694	378.421	0.251627	0.00199108	0.00853392
		ENSG00000106682	protein_coding	EIF4H	4394.82	4012.68	4776.96	0.251468	4.95921e-16	1.71134e-14
		ENSG00000165526	protein_coding	RPUSD4	491.379	448.598	534.16	0.251335	9.55218e-05	0.000587934
		ENSG00000138074	protein_coding	SLC5A6	589.395	538.124	640.667	0.25121	3.93889e-05	0.000267896
		ENSG00000130706	protein_coding	ADRM1	1672.29	1526.98	1817.61	0.251204	2.86633e-08	3.7331e-07
		ENSG00000168096	protein_coding	ANKS3	258.72	236.194	281.246	0.250887	0.0037298	0.0145461
		ENSG00000108559	protein_coding	NUP88	1453.9	1327.76	1580.04	0.250792	6.18422e-09	9.06372e-08
		ENSG00000213341	protein_coding	CHUK	1557.35	1422.28	1692.43	0.25073	5.1748e-09	7.67786e-08
		ENSG00000113811	protein_coding	SELENOK	469.023	428.294	509.753	0.250662	0.000218857	0.00123511
		ENSG00000160877	protein_coding	NACC1	2039.57	1862.78	2216.35	0.250609	2.1368e-08	2.83783e-07
		ENSG00000221944	protein_coding	TIGD1	179.945	164.283	195.606	0.250373	0.0146443	0.046225
		ENSG00000213585	protein_coding	VDAC1	3179.21	2904.15	3454.27	0.250188	3.75778e-11	7.48888e-10
		ENSG00000156261	protein_coding	CCT8	3882.1	3546.84	4217.36	0.24974	1.07286e-11	2.30445e-10
		ENSG00000152117	transcribed_processed_pseudogene	SMPD4BP	252.602	230.714	274.49	0.249655	0.00601968	0.0218992
		ENSG00000169288	protein_coding	MRPL1	772.061	705.394	838.729	0.249452	1.20595e-05	9.12318e-05
		ENSG00000135372	protein_coding	NAT10	3335.63	3048.11	3623.15	0.249254	1.22432e-11	2.59994e-10
		ENSG00000122873	protein_coding	CISD1	355.644	324.925	386.363	0.249148	0.00110615	0.00516326
		ENSG00000123131	protein_coding	PRDX4	747.224	682.836	811.611	0.248916	4.69954e-06	3.88514e-05
		ENSG00000167522	protein_coding	ANKRD11	6493.68	5934.83	7052.53	0.248896	3.20897e-13	8.3265e-12
		ENSG00000075089	protein_coding	ACTR6	380.647	347.81	413.485	0.248877	0.00144477	0.00649837
		ENSG00000153130	protein_coding	SCOC	597.365	545.911	648.82	0.248734	0.000124525	0.000744409
		ENSG00000183258	protein_coding	DDX41	820.505	749.974	891.036	0.248338	4.57115e-06	3.79203e-05
		ENSG00000117308	protein_coding	GALE	416.311	380.49	452.132	0.248287	0.0011781	0.00544732
		ENSG00000178719	protein_coding	GRINA	487.259	445.354	529.164	0.248252	0.000409469	0.00215281
		ENSG00000134597	protein_coding	RBMX2	356.609	325.918	387.299	0.248238	0.00165204	0.00727901
		ENSG00000117118	protein_coding	SDHB	804.356	735.269	873.444	0.248132	3.55607e-06	3.01988e-05
		ENSG00000145337	protein_coding	PYURF	458.685	419.26	498.11	0.248076	0.000371415	0.00197869
		ENSG00000129968	protein_coding	ABHD17A	414.611	378.967	450.255	0.24807	0.000535903	0.00272729
		ENSG00000151498	protein_coding	ACAD8	269.412	246.226	292.599	0.248014	0.00388426	0.0150543
		ENSG00000116898	protein_coding	MRPS15	1100.92	1006.45	1195.39	0.247979	3.29754e-07	3.54375e-06
		ENSG00000095574	protein_coding	IKZF5	755.963	691.09	820.836	0.247891	8.77791e-06	6.83719e-05
		ENSG00000114745	protein_coding	GORASP1	237.044	216.644	257.443	0.247873	0.00573811	0.0210476
		ENSG00000113643	protein_coding	RARS1	1888.59	1726.76	2050.41	0.247716	5.80921e-10	9.822e-09
		ENSG00000249550	lncRNA	LINC01234	687.428	628.477	746.379	0.247687	2.25086e-05	0.000161158
		ENSG00000158796	protein_coding	DEDD	314.962	287.91	342.014	0.247645	0.0022438	0.00945351
		ENSG00000149547	protein_coding	EI24	3219.7	2944.05	3495.34	0.24755	3.69138e-12	8.37774e-11
		ENSG00000159377	protein_coding	PSMB4	885.488	809.633	961.342	0.247501	2.34159e-06	2.07758e-05
		ENSG00000148175	protein_coding	STOM	520.9	476.268	565.531	0.247355	0.000220403	0.00124175
		ENSG00000092203	protein_coding	TOX4	834.31	762.915	905.705	0.247221	2.98965e-06	2.58847e-05
		ENSG00000116514	protein_coding	RNF19B	405.41	370.723	440.096	0.246865	0.000453486	0.0023512
		ENSG00000128607	protein_coding	KLHDC10	603.775	552.185	655.364	0.246732	6.09888e-05	0.000395781
		ENSG00000107819	protein_coding	SFXN3	747.664	683.808	811.519	0.246703	1.76336e-05	0.000129559
		ENSG00000103495	protein_coding	MAZ	1657.89	1516.42	1799.36	0.24666	3.43063e-08	4.39998e-07
		ENSG00000109445	protein_coding	ZNF330	752.277	688.052	816.502	0.246608	2.59225e-05	0.000183264
		ENSG00000167461	protein_coding	RAB8A	2851.73	2608.61	3094.85	0.2465	1.99979e-12	4.70999e-11
		ENSG00000128524	protein_coding	ATP6V1F	614.562	562.132	666.992	0.246356	9.92111e-05	0.00060864
		ENSG00000099942	protein_coding	CRKL	2313.73	2116.59	2510.87	0.246343	1.45015e-10	2.67365e-09
		ENSG00000119760	protein_coding	SUPT7L	788.738	721.481	855.995	0.246329	4.04045e-06	3.38682e-05
		ENSG00000165832	protein_coding	TRUB1	863.396	789.791	937	0.246292	4.35241e-06	3.62307e-05
		ENSG00000137760	protein_coding	ALKBH8	914.151	836.246	992.057	0.246226	2.64439e-06	2.31573e-05
		ENSG00000101457	protein_coding	DNTTIP1	474.836	434.33	515.342	0.246216	0.000564945	0.0028561
		ENSG00000101343	protein_coding	CRNKL1	1058.19	968.07	1148.32	0.246107	4.21954e-06	3.52465e-05
		ENSG00000213523	protein_coding	SRA1	424.018	387.859	460.176	0.246069	0.000780088	0.00379344
		ENSG00000170315	protein_coding	UBB	2860.82	2617.43	3104.22	0.245994	1.54024e-10	2.82852e-09
		ENSG00000145284	protein_coding	SCD5	369.206	337.748	400.664	0.245774	0.000921643	0.00440672
		ENSG00000129562	protein_coding	DAD1	522.881	478.393	567.369	0.245621	0.000287435	0.00156952
		ENSG00000100938	protein_coding	GMPR2	652.65	597.18	708.12	0.24545	5.06001e-05	0.000334159
		ENSG00000204104	protein_coding	TRAF3IP1	682.949	624.923	740.975	0.245386	2.43456e-05	0.000172914
		ENSG00000171497	protein_coding	PPID	1997.56	1828.01	2167.11	0.245372	7.10294e-09	1.03026e-07
		ENSG00000130956	protein_coding	HABP4	274.015	250.7	297.329	0.245199	0.0050562	0.0188086
		ENSG00000119471	protein_coding	HSDL2	868.142	794.549	941.736	0.244903	4.65441e-06	3.8535e-05
		ENSG00000151502	protein_coding	VPS26B	672.415	615.396	729.435	0.2449	4.04907e-05	0.000274282
		ENSG00000188343	protein_coding	CIBAR1	1493.58	1367.09	1620.08	0.244795	1.73877e-08	2.35377e-07
		ENSG00000187017	protein_coding	ESPN	399.402	365.555	433.249	0.244493	0.000927388	0.00442606
		ENSG00000170946	protein_coding	DNAJC24	368.749	337.502	399.996	0.244423	0.00131896	0.0059917
		ENSG00000141380	protein_coding	SS18	1141.12	1044.61	1237.62	0.244394	2.64155e-07	2.89607e-06
		ENSG00000164111	protein_coding	ANXA5	1907.16	1745.93	2068.38	0.244378	8.30096e-09	1.18867e-07
		ENSG00000160208	protein_coding	RRP1B	2724.54	2494.32	2954.76	0.244305	6.89254e-07	6.88436e-06
		ENSG00000162302	protein_coding	RPS6KA4	784.224	717.899	850.55	0.244301	4.57472e-05	0.000305465
		ENSG00000163798	protein_coding	SLC4A1AP	657.424	601.841	713.007	0.244162	0.000100237	0.000614038
		ENSG00000158042	protein_coding	MRPL17	531.228	486.321	576.134	0.244035	0.000211474	0.00119785
		ENSG00000144061	protein_coding	NPHP1	201.457	184.381	218.533	0.243944	0.0131921	0.0423232
		ENSG00000076924	protein_coding	XAB2	1145.45	1048.83	1242.08	0.243758	1.62186e-06	1.49247e-05
		ENSG00000175592	protein_coding	FOSL1	1568.49	1436.33	1700.66	0.243557	7.52761e-07	7.45676e-06
		ENSG00000122376	protein_coding	SHLD2	2166.6	1984.3	2348.91	0.243249	8.71416e-10	1.44152e-08
		ENSG00000148187	protein_coding	MRRF	983.84	901.077	1066.6	0.243052	6.37744e-07	6.41171e-06
		ENSG00000103429	protein_coding	BFAR	786.517	720.453	852.582	0.242625	6.29734e-06	5.06192e-05
		ENSG00000102241	protein_coding	HTATSF1	2051.05	1878.9	2223.19	0.242621	2.01674e-06	1.81809e-05
		ENSG00000178105	protein_coding	DDX10	3239	2967.29	3510.71	0.242543	1.04165e-10	1.96431e-09
		ENSG00000203760	protein_coding	CENPW	311.538	285.336	337.741	0.24247	0.00266713	0.0109414
		ENSG00000146733	protein_coding	PSPH	455.32	417.064	493.575	0.242465	0.000431232	0.00225107
		ENSG00000100612	protein_coding	DHRS7	331.595	303.745	359.444	0.242175	0.00234161	0.00981399
		ENSG00000134574	protein_coding	DDB2	558.8	511.94	605.659	0.242096	0.000103123	0.000629429
		ENSG00000198055	protein_coding	GRK6	957.566	877.342	1037.79	0.242049	7.15028e-06	5.67975e-05
		ENSG00000070423	protein_coding	RNF126	557.17	510.464	603.875	0.242004	0.000938612	0.00447388
		ENSG00000127554	protein_coding	GFER	294.927	270.165	319.688	0.242003	0.00452368	0.0171188
		ENSG00000163214	protein_coding	DHX57	809.041	741.306	876.777	0.24184	6.97921e-06	5.55435e-05
		ENSG00000023734	protein_coding	STRAP	1936.35	1774.36	2098.34	0.241829	8.32835e-10	1.38177e-08
		ENSG00000169733	protein_coding	RFNG	231.866	212.395	251.336	0.241816	0.0156488	0.0487655
		ENSG00000159199	protein_coding	ATP5MC1	456.7	418.442	494.958	0.241749	0.000344837	0.00185056
		ENSG00000150459	protein_coding	SAP18	1281.6	1174.39	1388.8	0.241732	1.17176e-07	1.37604e-06
		ENSG00000130382	protein_coding	MLLT1	653.051	598.394	707.709	0.241689	5.54128e-05	0.000361547
		ENSG00000101751	protein_coding	POLI	378.625	346.904	410.345	0.241661	0.000998909	0.00471987
		ENSG00000119321	protein_coding	FKBP15	899.758	824.547	974.969	0.241484	2.11557e-06	1.89804e-05
		ENSG00000099804	protein_coding	CDC34	601.807	551.475	652.14	0.241482	0.000186905	0.00107239
		ENSG00000235173	protein_coding	HGH1	251.814	230.706	272.921	0.241466	0.00910466	0.0310873
		ENSG00000175792	protein_coding	RUVBL1	1733.26	1588.52	1878	0.241375	6.91501e-09	1.00734e-07
		ENSG00000108587	protein_coding	GOSR1	995.511	912.358	1078.66	0.241329	2.33147e-06	2.06968e-05
		ENSG00000161526	protein_coding	SAP30BP	1323.48	1212.99	1433.96	0.241255	9.91942e-08	1.17719e-06
		ENSG00000084623	protein_coding	EIF3I	2457.84	2252.84	2662.83	0.241118	5.6165e-10	9.51528e-09
		ENSG00000164941	protein_coding	INTS8	1706.42	1564.08	1848.75	0.241092	7.44611e-09	1.07449e-07
		ENSG00000165630	protein_coding	PRPF18	222.993	204.322	241.663	0.241062	0.011125	0.0367921
		ENSG00000141034	protein_coding	GID4	255.048	233.717	276.38	0.240938	0.00579282	0.0212068
		ENSG00000183495	protein_coding	EP400	3391.56	3109.12	3673.99	0.240767	2.41707e-11	4.96383e-10
		ENSG00000170515	protein_coding	PA2G4	3555.85	3259.76	3851.95	0.240754	3.05115e-10	5.369e-09
		ENSG00000136271	protein_coding	DDX56	1583.33	1451.49	1715.17	0.240665	2.76103e-08	3.60991e-07
		ENSG00000141503	protein_coding	MINK1	1550.67	1421.58	1679.76	0.240599	7.63999e-08	9.27595e-07
		ENSG00000134684	protein_coding	YARS1	2156.71	1977.23	2336.19	0.240565	1.79101e-09	2.82003e-08
		ENSG00000172171	protein_coding	TEFM	241.08	220.946	261.215	0.240542	0.0112822	0.0372386
		ENSG00000130811	protein_coding	EIF3G	1613.42	1479.19	1747.64	0.240453	1.80691e-07	2.04492e-06
		ENSG00000185900	protein_coding	POMK	3106.51	2848.15	3364.88	0.240452	9.81189e-13	2.40513e-11
		ENSG00000118418	protein_coding	HMGN3	229.558	210.391	248.725	0.240427	0.0108991	0.0361587
		ENSG00000071994	protein_coding	PDCD2	1940.65	1779.24	2102.06	0.240414	7.06817e-09	1.0261e-07
		ENSG00000185043	protein_coding	CIB1	239.34	219.362	259.317	0.240395	0.00964277	0.0326597
		ENSG00000176171	protein_coding	BNIP3	610.704	559.864	661.544	0.240365	6.8169e-05	0.000436157
		ENSG00000100139	protein_coding	MICALL1	388.469	356.1	420.838	0.24036	0.00143437	0.00646024
		ENSG00000120686	protein_coding	UFM1	1019.97	935.133	1104.8	0.240309	6.20277e-06	5.00262e-05
		ENSG00000122882	protein_coding	ECD	967.547	887.096	1048	0.240226	1.6698e-06	1.53239e-05
		ENSG00000145220	protein_coding	LYAR	1450.03	1329.54	1570.51	0.240139	2.70938e-08	3.55065e-07
		ENSG00000200488	misc_RNA	RN7SKP203	385.873	353.755	417.991	0.240097	0.00444338	0.0168604
		ENSG00000223496	protein_coding	EXOSC6	363.784	333.51	394.058	0.240017	0.00260671	0.0107328
		ENSG00000079785	protein_coding	DDX1	2198.06	2015.57	2380.55	0.240002	6.11746e-10	1.03018e-08
		ENSG00000115368	protein_coding	WDR75	2297	2106.33	2487.66	0.239951	9.83554e-10	1.60806e-08
		ENSG00000078246	protein_coding	TULP3	552.949	507.012	598.886	0.239825	0.000269826	0.00148444
		ENSG00000159840	protein_coding	ZYX	810.846	743.523	878.169	0.239824	7.05123e-05	0.000448593
		ENSG00000105171	protein_coding	POP4	356.908	327.23	386.586	0.239808	0.00150344	0.00671628
		ENSG00000168872	protein_coding	DDX19A	588.252	539.391	637.112	0.239805	0.000224612	0.00126251
		ENSG00000142207	protein_coding	URB1	2516.81	2308.07	2725.54	0.23976	4.74852e-09	7.08911e-08
		ENSG00000125166	protein_coding	GOT2	2098.56	1924.52	2272.6	0.239732	6.2837e-10	1.05712e-08
		ENSG00000170191	protein_coding	NANP	211.635	194.024	229.245	0.239517	0.0119658	0.0389906
		ENSG00000070501	protein_coding	POLB	369.699	339.02	400.378	0.23934	0.00143308	0.00645616
		ENSG00000106052	protein_coding	TAX1BP1	2702.57	2479.13	2926.01	0.239008	8.97374e-10	1.483e-08
		ENSG00000101384	protein_coding	JAG1	655.884	601.61	710.157	0.238942	4.34672e-05	0.000291745
		ENSG00000266412	protein_coding	NCOA4	1474.53	1352.63	1596.43	0.238913	1.60311e-07	1.83244e-06
		ENSG00000221867	protein_coding	MAGEA3	1029.96	944.798	1115.11	0.23888	1.69154e-06	1.5486e-05
		ENSG00000164535	protein_coding	DAGLB	321.98	295.305	348.656	0.238853	0.00216485	0.00916672
		ENSG00000167680	protein_coding	SEMA6B	372.156	341.365	402.948	0.238635	0.00194693	0.00838526
		ENSG00000176720	protein_coding	BOK	238.61	218.847	258.373	0.238527	0.0134386	0.0430075
		ENSG00000243943	protein_coding	ZNF512	340.675	312.498	368.851	0.238489	0.00222985	0.00940178
		ENSG00000031698	protein_coding	SARS1	1719.96	1578.08	1861.85	0.238429	3.32437e-09	5.04347e-08
		ENSG00000023287	protein_coding	RB1CC1	1819.34	1669.3	1969.39	0.238369	4.96677e-07	5.12188e-06
		ENSG00000108511	protein_coding	HOXB6	524.143	480.859	567.426	0.238362	0.000236834	0.0013215
		ENSG00000130305	protein_coding	NSUN5	648.839	595.292	702.386	0.238296	0.000186638	0.00107123
		ENSG00000137054	protein_coding	POLR1E	2306.57	2116.5	2496.64	0.238204	1.44033e-09	2.30343e-08
		ENSG00000167674	protein_coding	HDGFL2	516.701	474.063	559.34	0.238185	0.000439114	0.00228654
		ENSG00000167272	protein_coding	POP5	342.757	314.461	371.054	0.238052	0.00186924	0.00808997
		ENSG00000134480	protein_coding	CCNH	1112.77	1021.11	1204.43	0.237998	4.09314e-07	4.31883e-06
		ENSG00000187325	protein_coding	TAF9B	506.204	464.512	547.897	0.237717	0.000404409	0.00212953
		ENSG00000133606	protein_coding	MKRN1	856.224	785.826	926.622	0.237493	1.14458e-05	8.71374e-05
		ENSG00000125485	protein_coding	DDX31	930.492	853.995	1006.99	0.237493	5.01581e-06	4.12231e-05
		ENSG00000152240	protein_coding	HAUS1	406.075	372.654	439.496	0.237428	0.000835633	0.0040379
		ENSG00000127526	protein_coding	SLC35E1	1448.6	1329.68	1567.51	0.23723	4.02245e-08	5.09693e-07
		ENSG00000137876	protein_coding	RSL24D1	1836.06	1685.43	1986.68	0.237114	1.66003e-07	1.89013e-06
		ENSG00000152464	protein_coding	RPP38	297.679	273.194	322.165	0.237076	0.00405971	0.0156371
		ENSG00000101474	protein_coding	APMAP	1024.26	940.214	1108.3	0.237056	1.0409e-05	7.98939e-05
		ENSG00000125686	protein_coding	MED1	3661.4	3361.5	3961.31	0.236808	4.57257e-10	7.85735e-09
		ENSG00000253738	lncRNA	OTUD6B-AS1	664.581	610.091	719.072	0.236754	0.000237799	0.001326
		ENSG00000165699	protein_coding	TSC1	1201.7	1103.25	1300.14	0.236707	4.49041e-07	4.68807e-06
		ENSG00000151881	protein_coding	TMEM267	334.341	306.893	361.788	0.236695	0.00291944	0.0118068
		ENSG00000178982	protein_coding	EIF3K	755.052	693.217	816.886	0.236512	3.67654e-05	0.000252051
		ENSG00000085719	protein_coding	CPNE3	1858.09	1706.07	2010.12	0.23648	1.64435e-09	2.60253e-08
		ENSG00000134283	protein_coding	PPHLN1	1135.89	1042.95	1228.83	0.236401	1.69206e-06	1.5486e-05
		ENSG00000075239	protein_coding	ACAT1	851.212	781.581	920.844	0.236283	5.44225e-06	4.43384e-05
		ENSG00000115211	protein_coding	EIF2B4	764.085	701.586	826.584	0.23623	2.03692e-05	0.000147092
		ENSG00000055950	protein_coding	MRPL43	776.887	713.346	840.427	0.236215	1.23403e-05	9.30216e-05
		ENSG00000171204	protein_coding	TMEM126B	501.844	460.783	542.904	0.236139	0.000510644	0.00261137
		ENSG00000083812	protein_coding	ZNF324	217.639	199.79	235.489	0.236083	0.0137078	0.0436866
		ENSG00000261609	protein_coding	GAN	2615.42	2401.95	2828.88	0.235932	3.45395e-10	6.02118e-09
		ENSG00000119414	protein_coding	PPP6C	848.725	779.414	918.036	0.235882	1.52085e-05	0.000113223
		ENSG00000041802	protein_coding	LSG1	1563	1435.56	1690.45	0.235642	1.17524e-08	1.63158e-07
		ENSG00000090470	protein_coding	PDCD7	616.822	566.492	667.153	0.23558	6.58166e-05	0.000423844
		ENSG00000123179	protein_coding	EBPL	312.012	286.533	337.491	0.235389	0.00404734	0.0155966
		ENSG00000013561	protein_coding	RNF14	726.386	667.188	785.584	0.235348	6.17262e-05	0.000399488
		ENSG00000052749	protein_coding	RRP12	2206.81	2027.19	2386.43	0.235265	3.05554e-08	3.9642e-07
		ENSG00000128463	protein_coding	EMC4	701.113	643.993	758.232	0.235258	4.37764e-05	0.000293469
		ENSG00000125945	protein_coding	ZNF436	326.095	299.503	352.687	0.235095	0.0028851	0.0116932
		ENSG00000068308	protein_coding	OTUD5	989.707	909.181	1070.23	0.235047	2.23939e-06	2.00167e-05
		ENSG00000138382	protein_coding	METTL5	546.93	502.396	591.463	0.235033	0.000319432	0.00172688
		ENSG00000031691	protein_coding	CENPQ	392.945	360.958	424.931	0.234798	0.000970857	0.00460424
		ENSG00000147364	protein_coding	FBXO25	217.793	200.031	235.555	0.234762	0.0129161	0.0415258
		ENSG00000079332	protein_coding	SAR1A	1498	1376.37	1619.63	0.234639	1.71673e-08	2.32767e-07
		ENSG00000160563	protein_coding	MED27	244.318	224.416	264.219	0.234595	0.00833142	0.0288329
		ENSG00000126953	protein_coding	TIMM8A	231.615	212.749	250.481	0.234536	0.0115002	0.0378324
		ENSG00000132664	protein_coding	POLR3F	538.572	494.878	582.265	0.234166	0.000165703	0.000961888
		ENSG00000124228	protein_coding	DDX27	1629.23	1497.31	1761.15	0.234003	1.23788e-07	1.44763e-06
		ENSG00000101782	protein_coding	RIOK3	837.511	769.658	905.364	0.234001	6.15951e-05	0.000398947
		ENSG00000065054	protein_coding	SLC9A3R2	420.278	386.208	454.348	0.23386	0.00164122	0.007237
		ENSG00000144747	protein_coding	TMF1	1904.56	1750.48	2058.64	0.233818	1.98127e-07	2.21544e-06
		ENSG00000213995	protein_coding	NAXD	363.763	334.278	393.248	0.233745	0.00173217	0.00758836
		ENSG00000169635	protein_coding	HIC2	358.49	329.432	387.548	0.233738	0.00393674	0.0152227
		ENSG00000095906	protein_coding	NUBP2	434.96	399.725	470.196	0.233712	0.00115747	0.00536521
		ENSG00000079462	protein_coding	PAFAH1B3	406.226	373.323	439.13	0.233648	0.00202776	0.00864711
		ENSG00000163319	protein_coding	MRPS18C	250.528	230.209	270.846	0.233594	0.0119384	0.0389134
		ENSG00000179091	protein_coding	CYC1	1023.5	940.769	1106.23	0.233514	1.80614e-06	1.64586e-05
		ENSG00000129245	protein_coding	FXR2	999.388	918.615	1080.16	0.233481	8.64498e-06	6.73988e-05
		ENSG00000112282	protein_coding	MED23	750.74	690.14	811.34	0.233106	4.1914e-05	0.000282899
		ENSG00000112306	protein_coding	RPS12	2190.68	2014.07	2367.28	0.233008	0.00626292	0.0226325
		ENSG00000170264	protein_coding	FAM161A	423.206	389.028	457.385	0.232982	0.00119135	0.00550106
		ENSG00000147140	protein_coding	NONO	3948.49	3630.31	4266.68	0.23296	5.33105e-10	9.06816e-09
		ENSG00000255112	protein_coding	CHMP1B	397.14	365.072	429.208	0.232908	0.00142905	0.00643971
		ENSG00000143621	protein_coding	ILF2	3838.02	3529.27	4146.76	0.232553	9.14548e-12	1.98211e-10
		ENSG00000168288	protein_coding	MMADHC	1080.34	993.404	1167.28	0.232481	6.01942e-06	4.87107e-05
		ENSG00000007080	protein_coding	CCDC124	881.18	810.262	952.097	0.232455	0.000164918	0.000958325
		ENSG00000204356	protein_coding	NELFE	443.52	407.806	479.233	0.232316	0.00197332	0.00847076
		ENSG00000152601	protein_coding	MBNL1	6872.48	6320.42	7424.55	0.23225	1.07951e-09	1.75642e-08
		ENSG00000129460	protein_coding	NGDN	517.227	475.616	558.839	0.232182	0.00116884	0.00541196
		ENSG00000139651	protein_coding	ZNF740	974.659	896.328	1052.99	0.232154	3.23502e-06	2.77902e-05
		ENSG00000154723	protein_coding	ATP5PF	416.614	383.121	450.107	0.231911	0.00273138	0.0111642
		ENSG00000184216	protein_coding	IRAK1	1895.82	1743.81	2047.83	0.23173	3.25203e-08	4.18687e-07
		ENSG00000132017	protein_coding	DCAF15	362.345	333.231	391.459	0.231696	0.00360002	0.0141184
		ENSG00000180917	protein_coding	CMTR2	1259.72	1158.82	1360.62	0.23142	1.71449e-06	1.56573e-05
		ENSG00000132170	protein_coding	PPARG	539.269	496.035	582.504	0.231394	0.000324898	0.00175193
		ENSG00000112249	protein_coding	ASCC3	3867.63	3558.05	4177.21	0.231393	1.94065e-09	3.04288e-08
		ENSG00000130414	protein_coding	NDUFA10	1382.34	1271.81	1492.87	0.231035	3.76315e-07	3.99568e-06
		ENSG00000166260	protein_coding	COX11	708.652	651.992	765.312	0.230867	5.20165e-05	0.000342305
		ENSG00000166130	protein_coding	IKBIP	1228.94	1130.77	1327.12	0.230805	1.80649e-05	0.000132382
		ENSG00000185009	protein_coding	AP3M1	787.103	724.247	849.959	0.230617	8.09055e-05	0.000507241
		ENSG00000179021	protein_coding	C3orf38	462.833	425.858	499.809	0.230504	0.000550921	0.00279275
		ENSG00000117906	protein_coding	RCN2	1245.94	1146.55	1345.33	0.230474	3.22515e-05	0.00022415
		ENSG00000160803	protein_coding	UBQLN4	992.287	913.117	1071.46	0.230468	7.43115e-06	5.87442e-05
		ENSG00000108828	protein_coding	VAT1	799.809	735.992	863.625	0.230425	0.000185655	0.00106631
		ENSG00000164896	protein_coding	FASTK	356.538	328.062	385.014	0.230293	0.00244529	0.0101751
		ENSG00000087263	protein_coding	OGFOD1	1323.99	1218.54	1429.44	0.230122	2.81054e-07	3.0634e-06
		ENSG00000158773	protein_coding	USF1	470.559	433.032	508.085	0.230104	0.000611043	0.00305794
		ENSG00000169689	protein_coding	CENPX	425.589	391.664	459.515	0.229954	0.00301315	0.0121101
		ENSG00000029364	protein_coding	SLC39A9	1675.21	1541.92	1808.5	0.229925	3.20674e-08	4.13171e-07
		ENSG00000172888	protein_coding	ZNF621	874.936	805.302	944.57	0.229862	1.46674e-05	0.000109534
		ENSG00000124172	protein_coding	ATP5F1E	977.025	899.284	1054.77	0.229838	0.000126427	0.000754439
		ENSG00000142546	protein_coding	NOSIP	669.097	615.841	722.353	0.229802	8.51065e-05	0.000531009
		ENSG00000138593	protein_coding	SECISBP2L	1502.49	1383.03	1621.96	0.229756	1.05125e-06	1.01045e-05
		ENSG00000196961	protein_coding	AP2A1	677.196	623.316	731.076	0.229716	0.000132674	0.000788088
		ENSG00000107443	protein_coding	CCNJ	597.51	549.978	645.042	0.229635	0.000245088	0.00136394
		ENSG00000166974	protein_coding	MAPRE2	795.277	732.072	858.482	0.229512	1.55253e-05	0.000115429
		ENSG00000160087	protein_coding	UBE2J2	614.528	565.677	663.379	0.229481	0.000211045	0.00119583
		ENSG00000178952	protein_coding	TUFM	3378.05	3110.08	3646.02	0.229305	1.85475e-09	2.91634e-08
[truncated: 3,742 more rows]
